# Supplementary material for: In utero and childhood exposure to tobacco smoke and multi-layer molecular signatures in children
Source: Springer Nature journal article supplement (doi:10.1186/s12916-020-01686-8), 2020-08-19

cg14179389

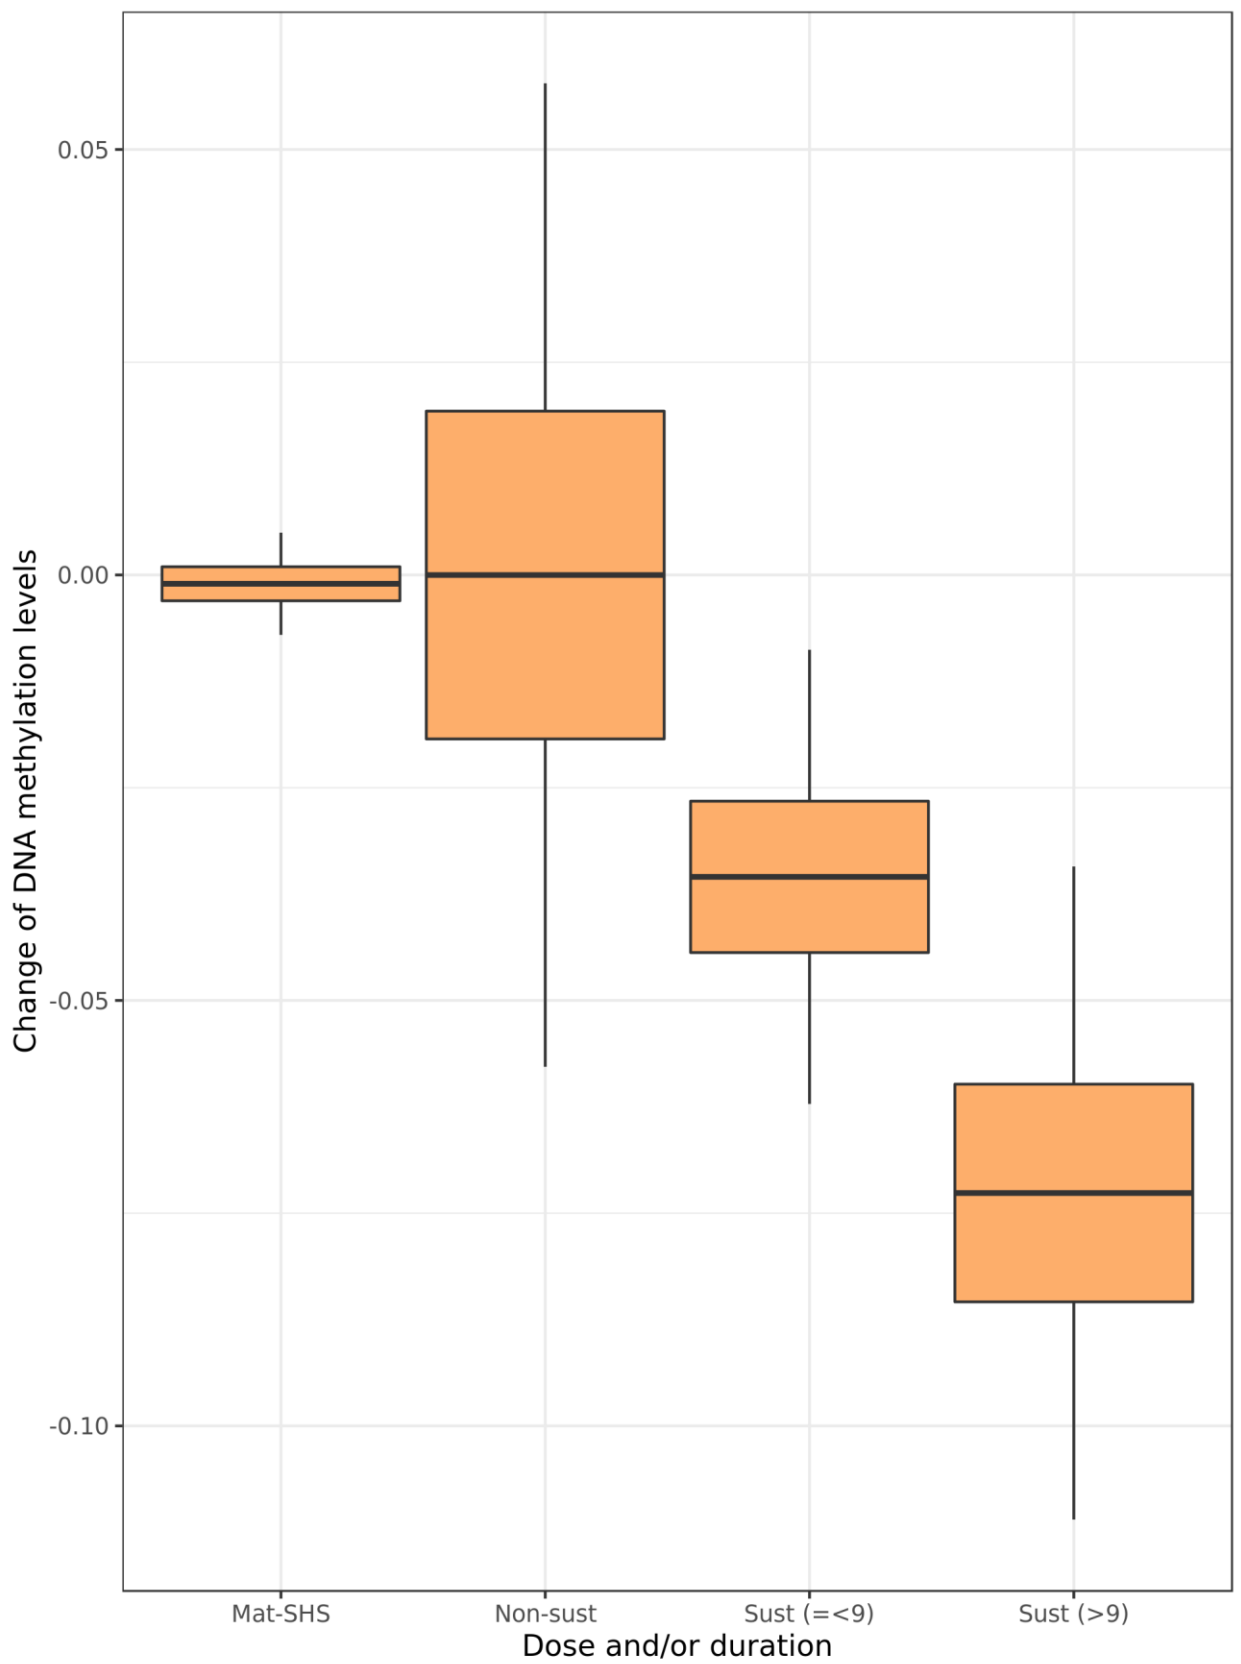

cg13822849

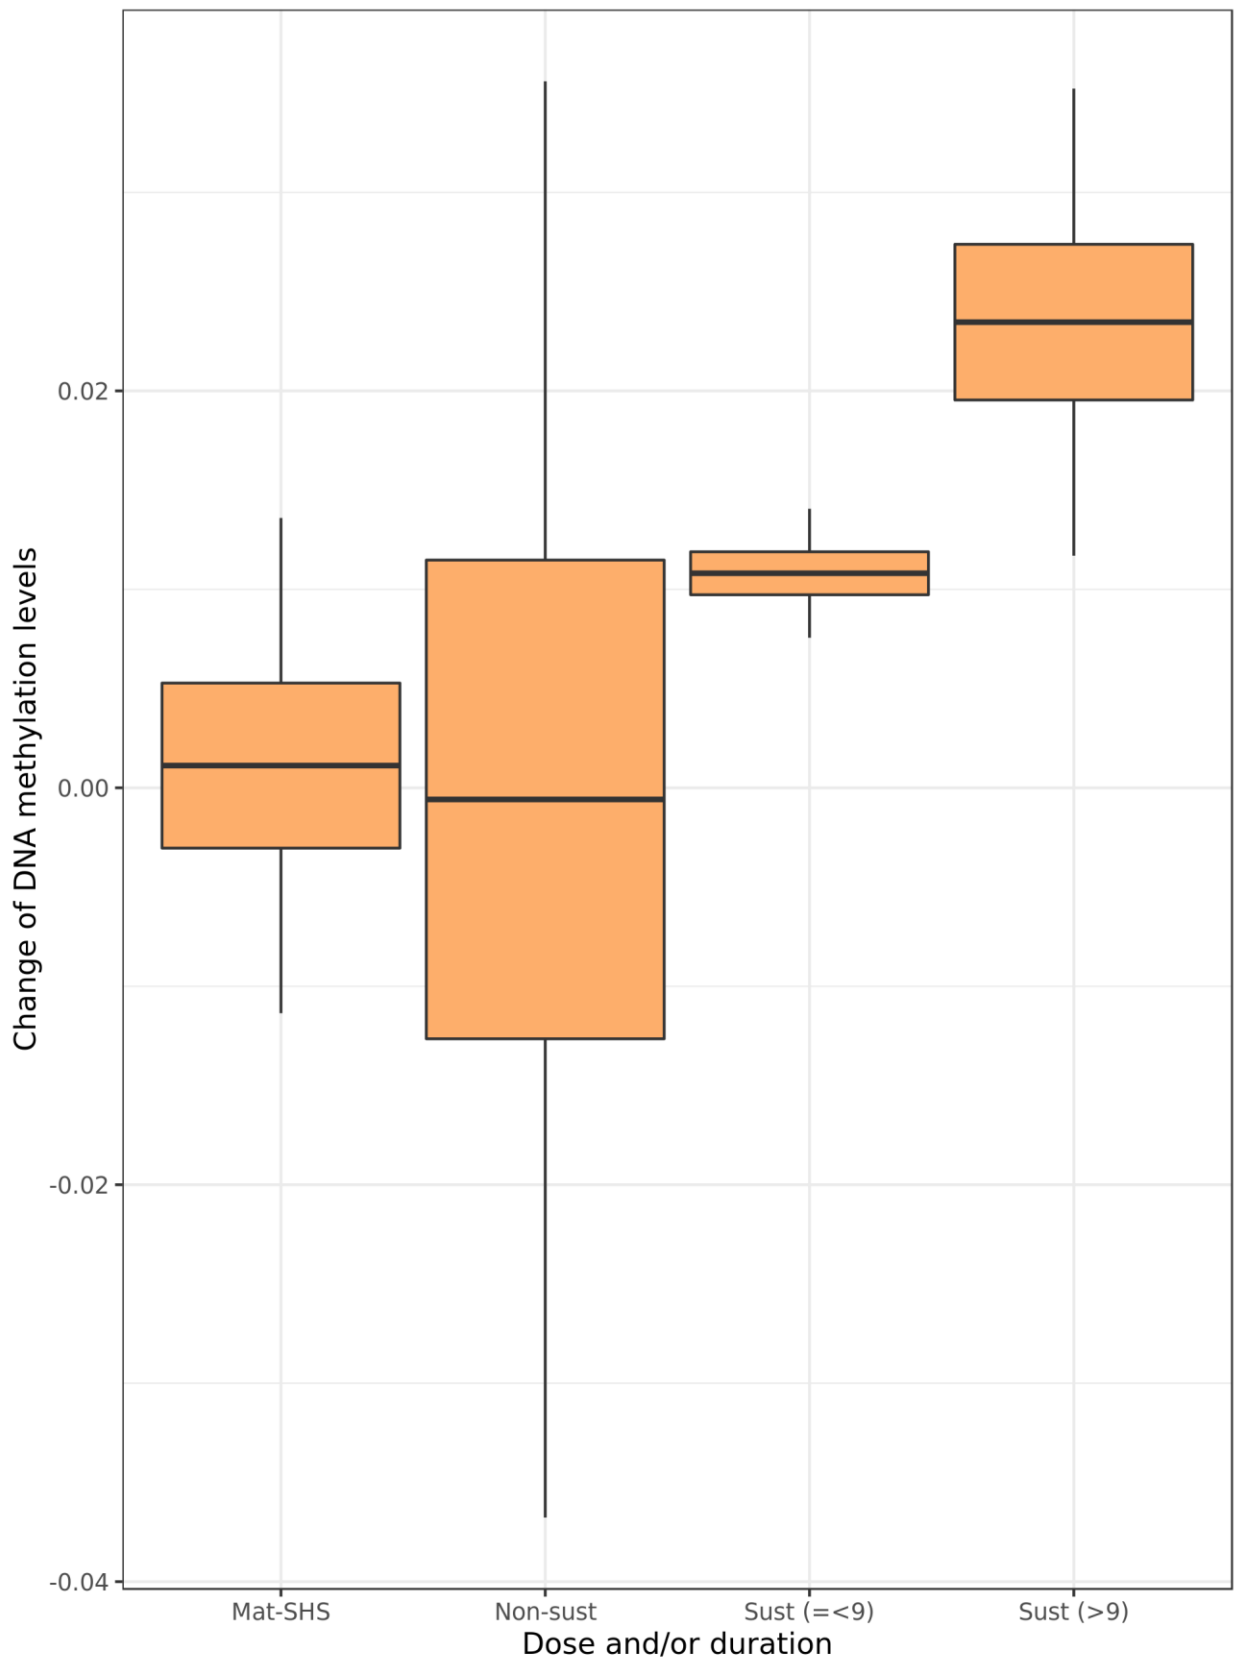

cg13570656

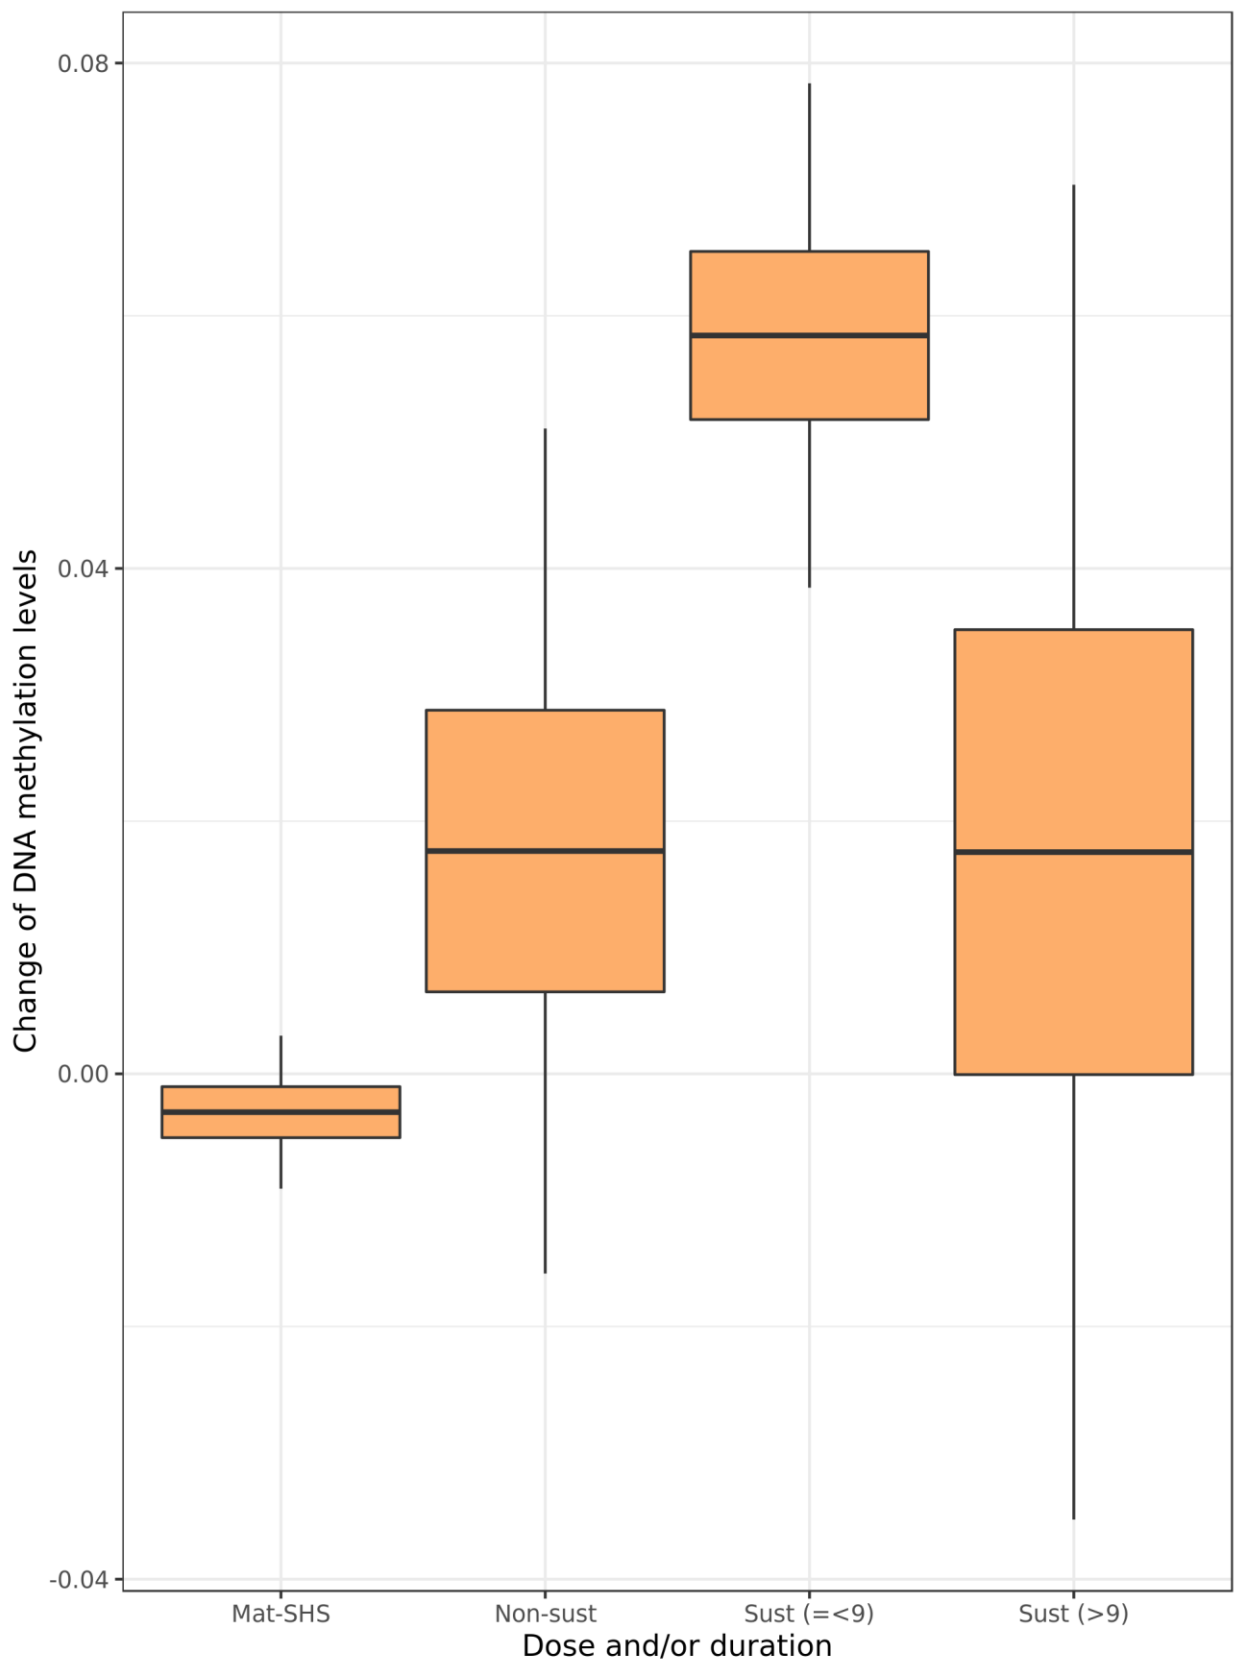

cg12803068

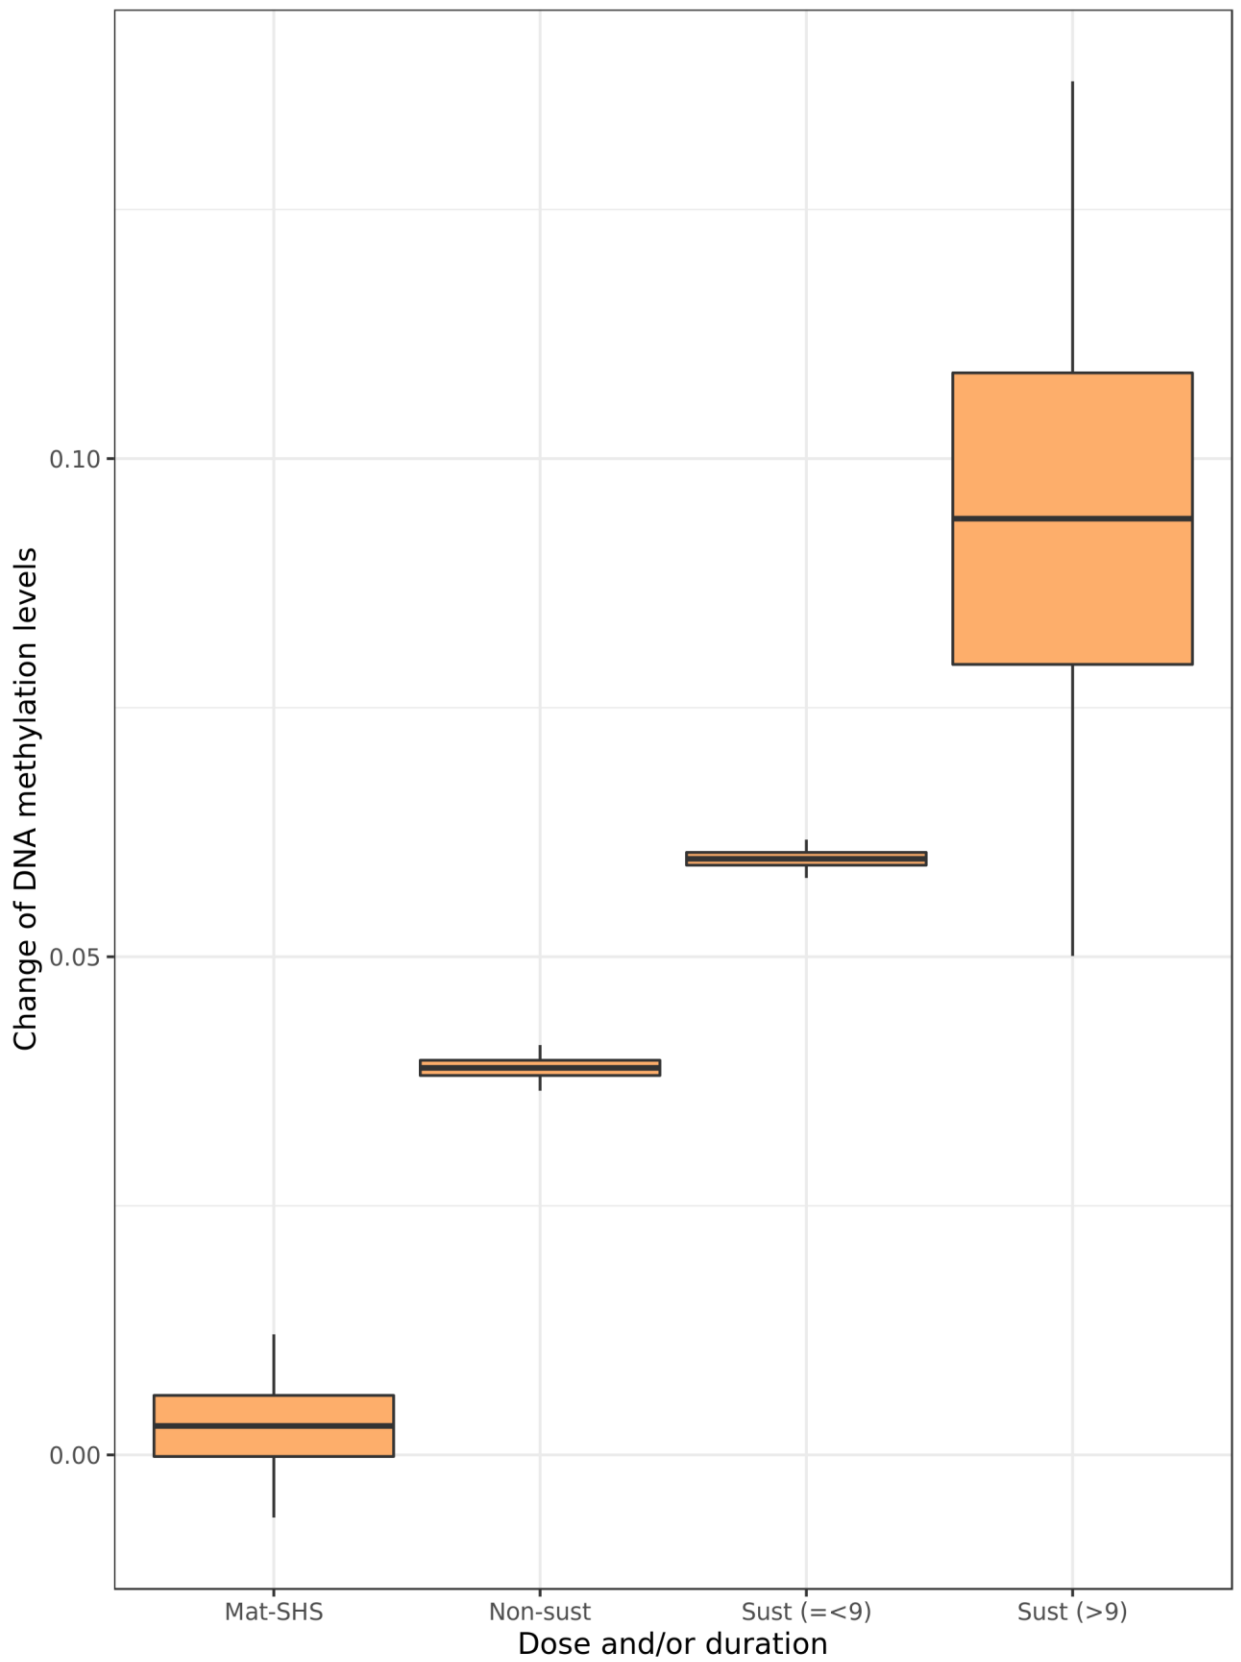

cg12101586

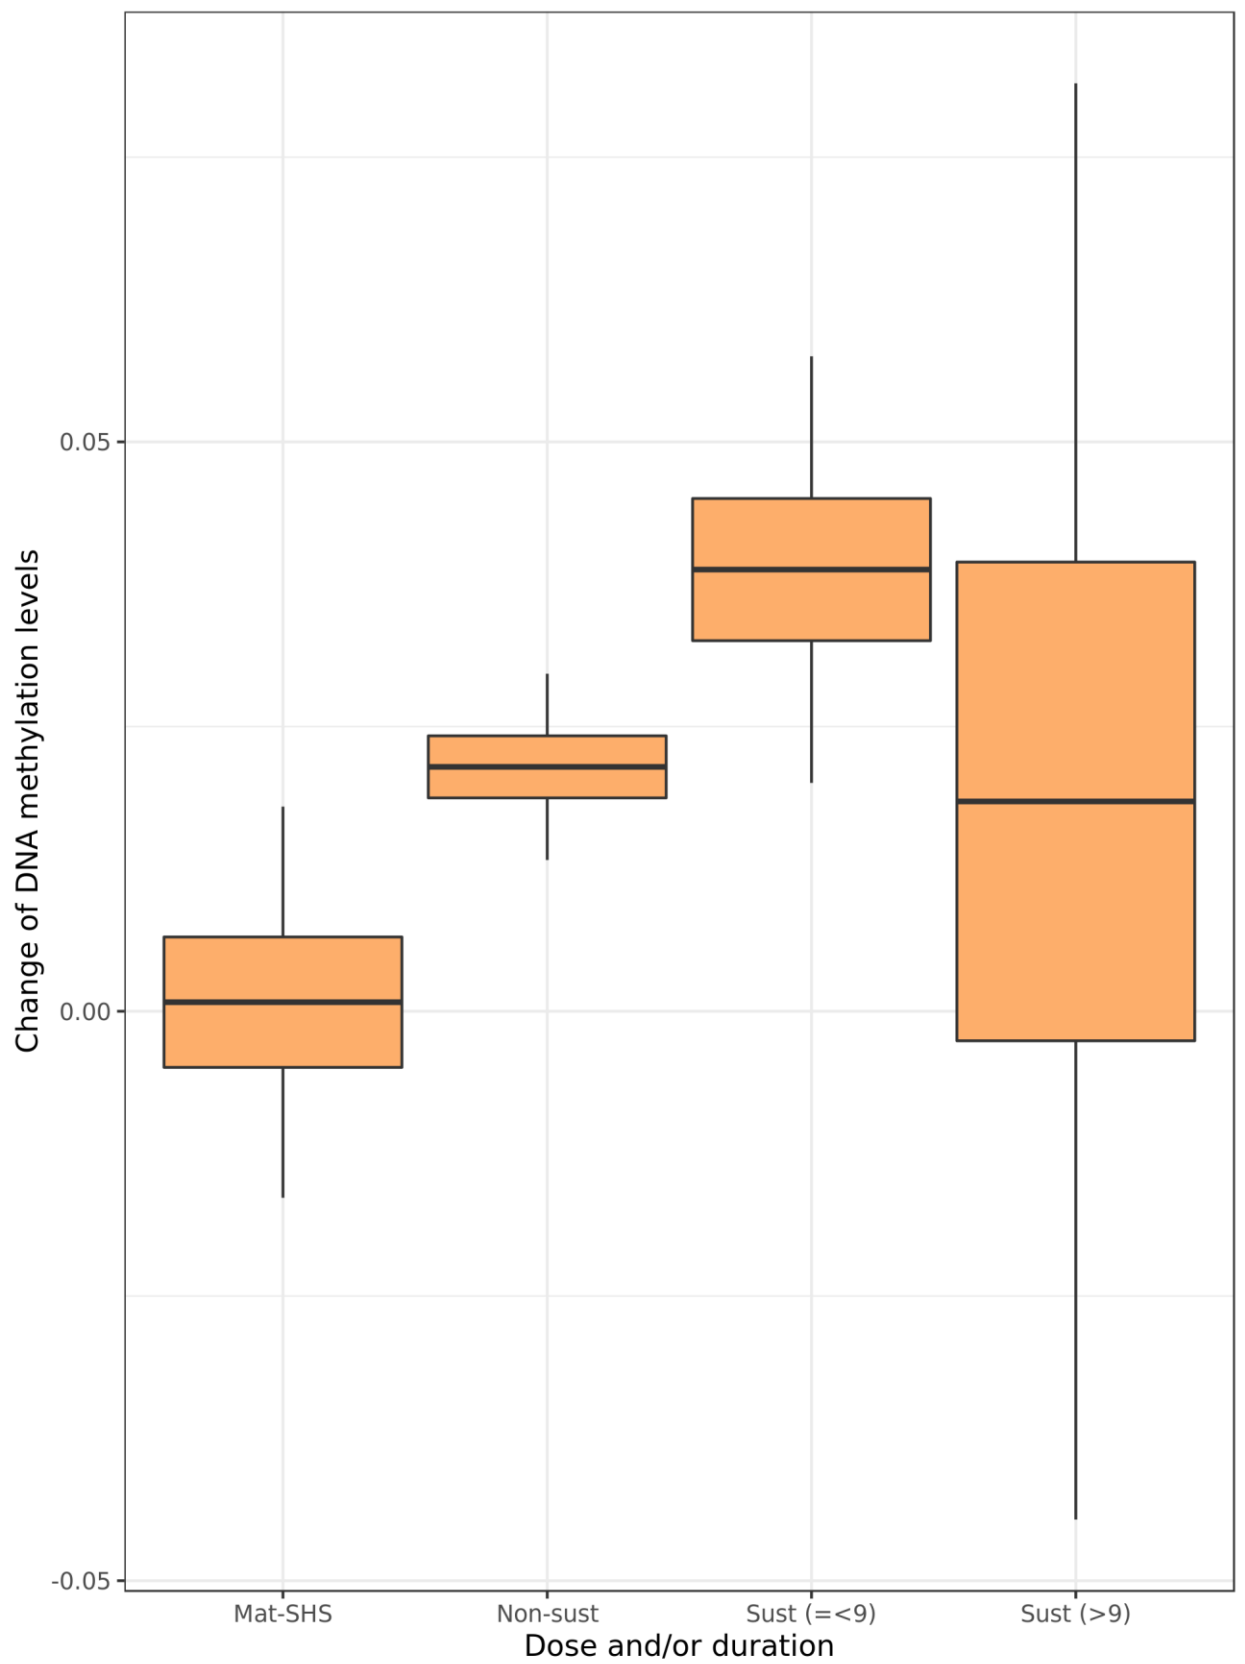

cg11924019

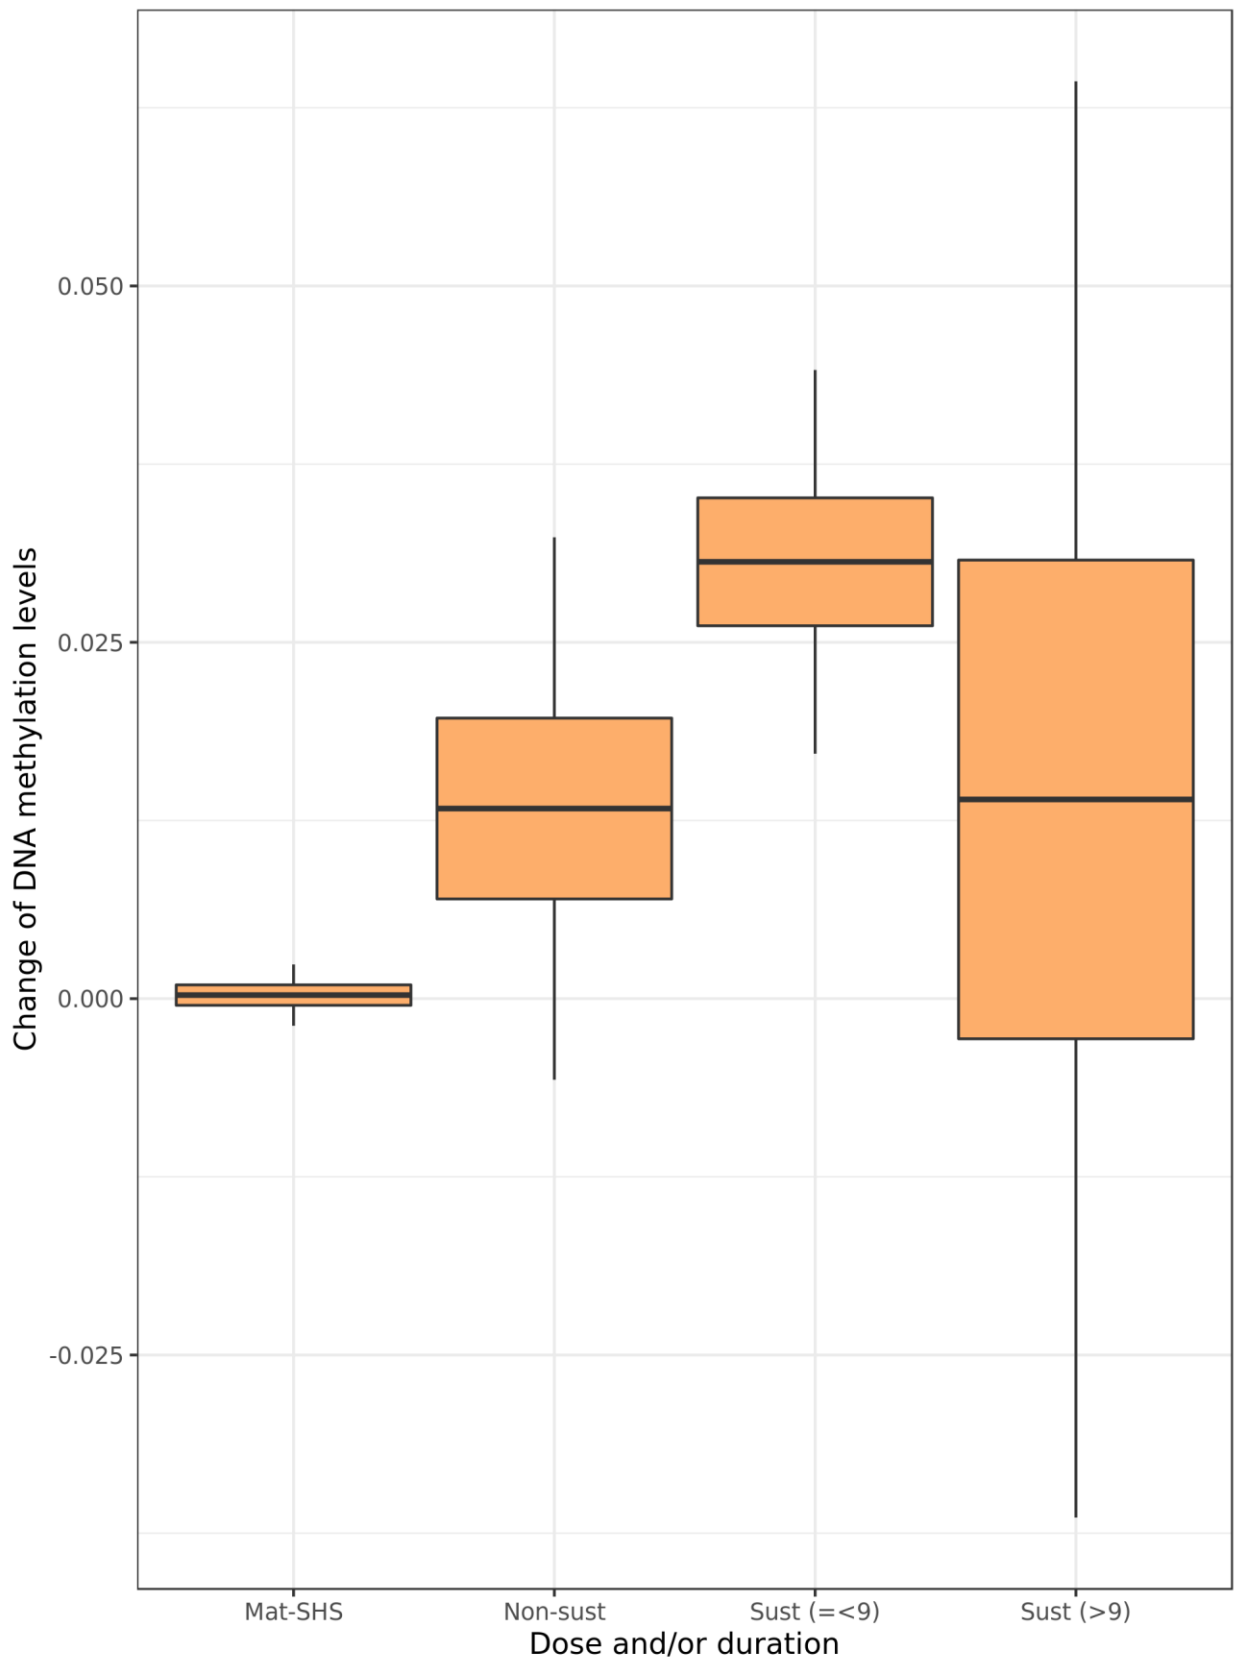

cg11902777

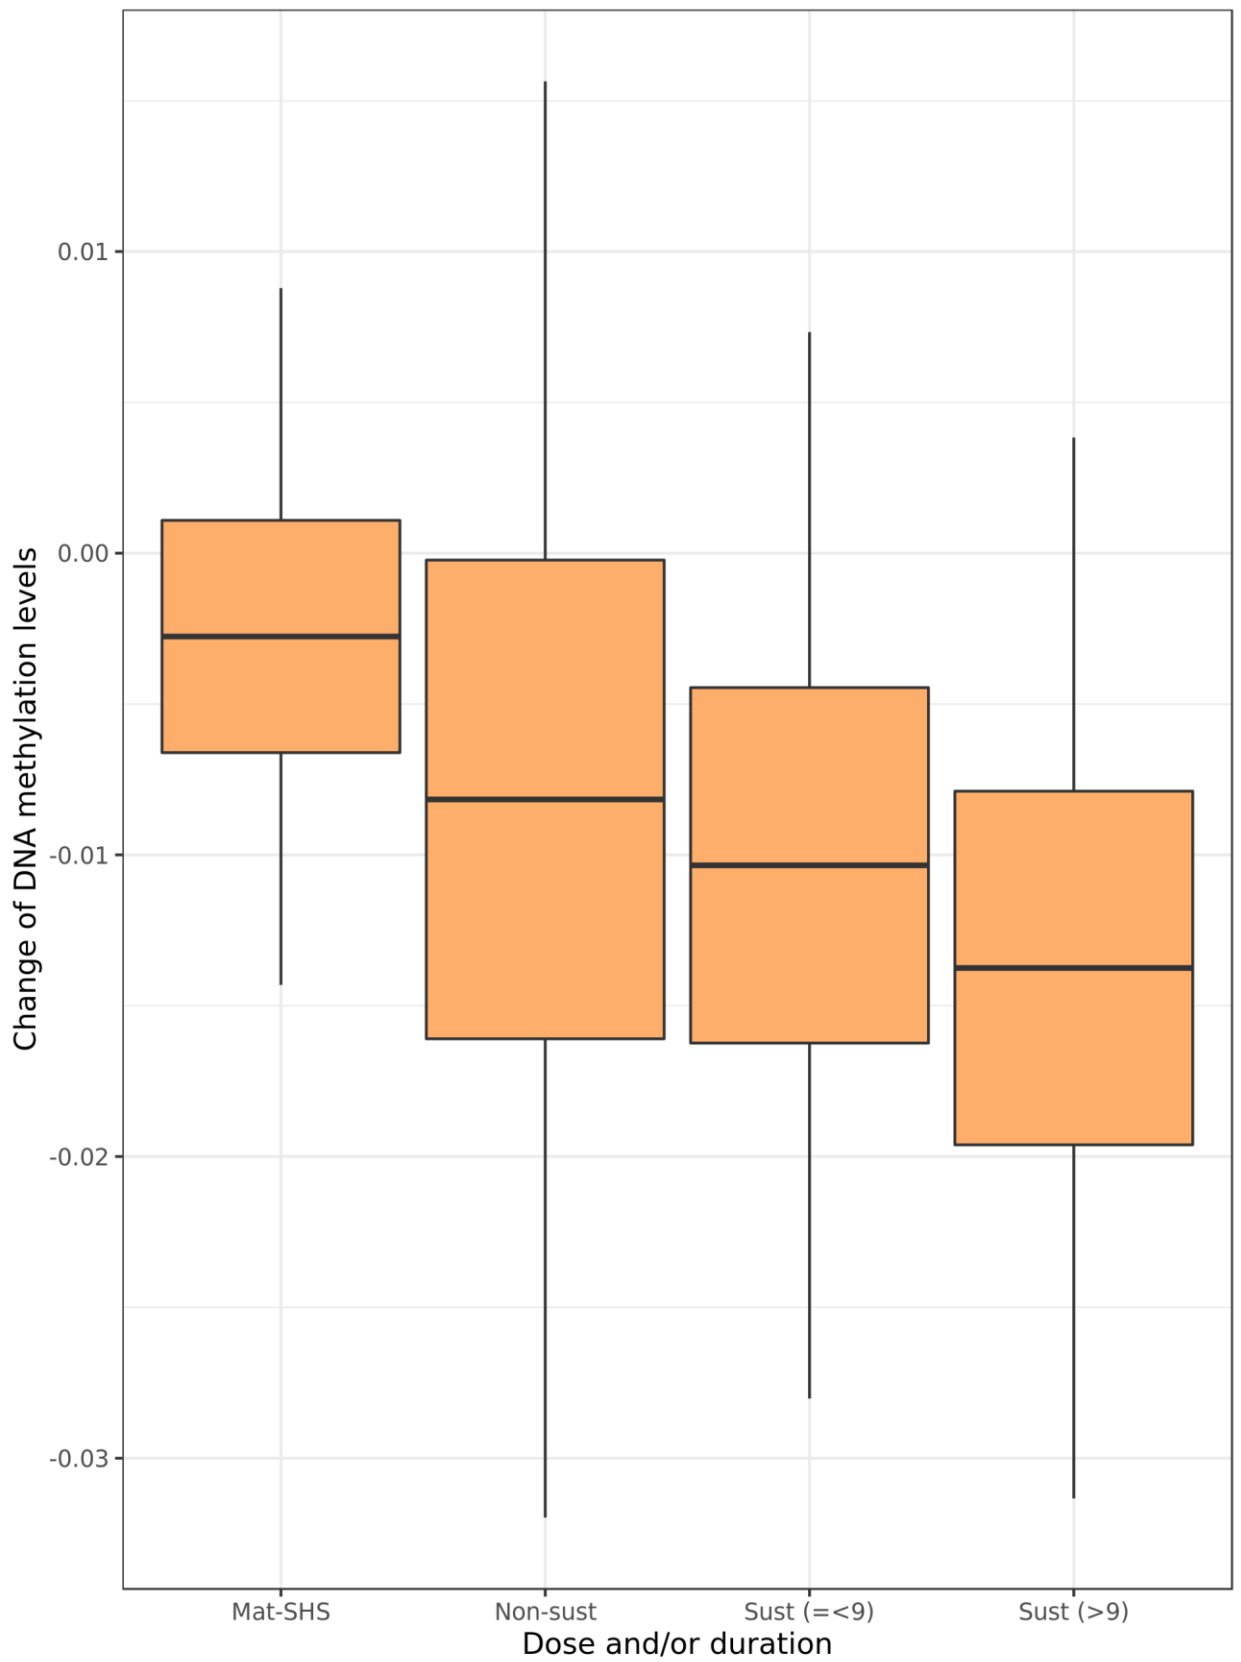

cg11813497

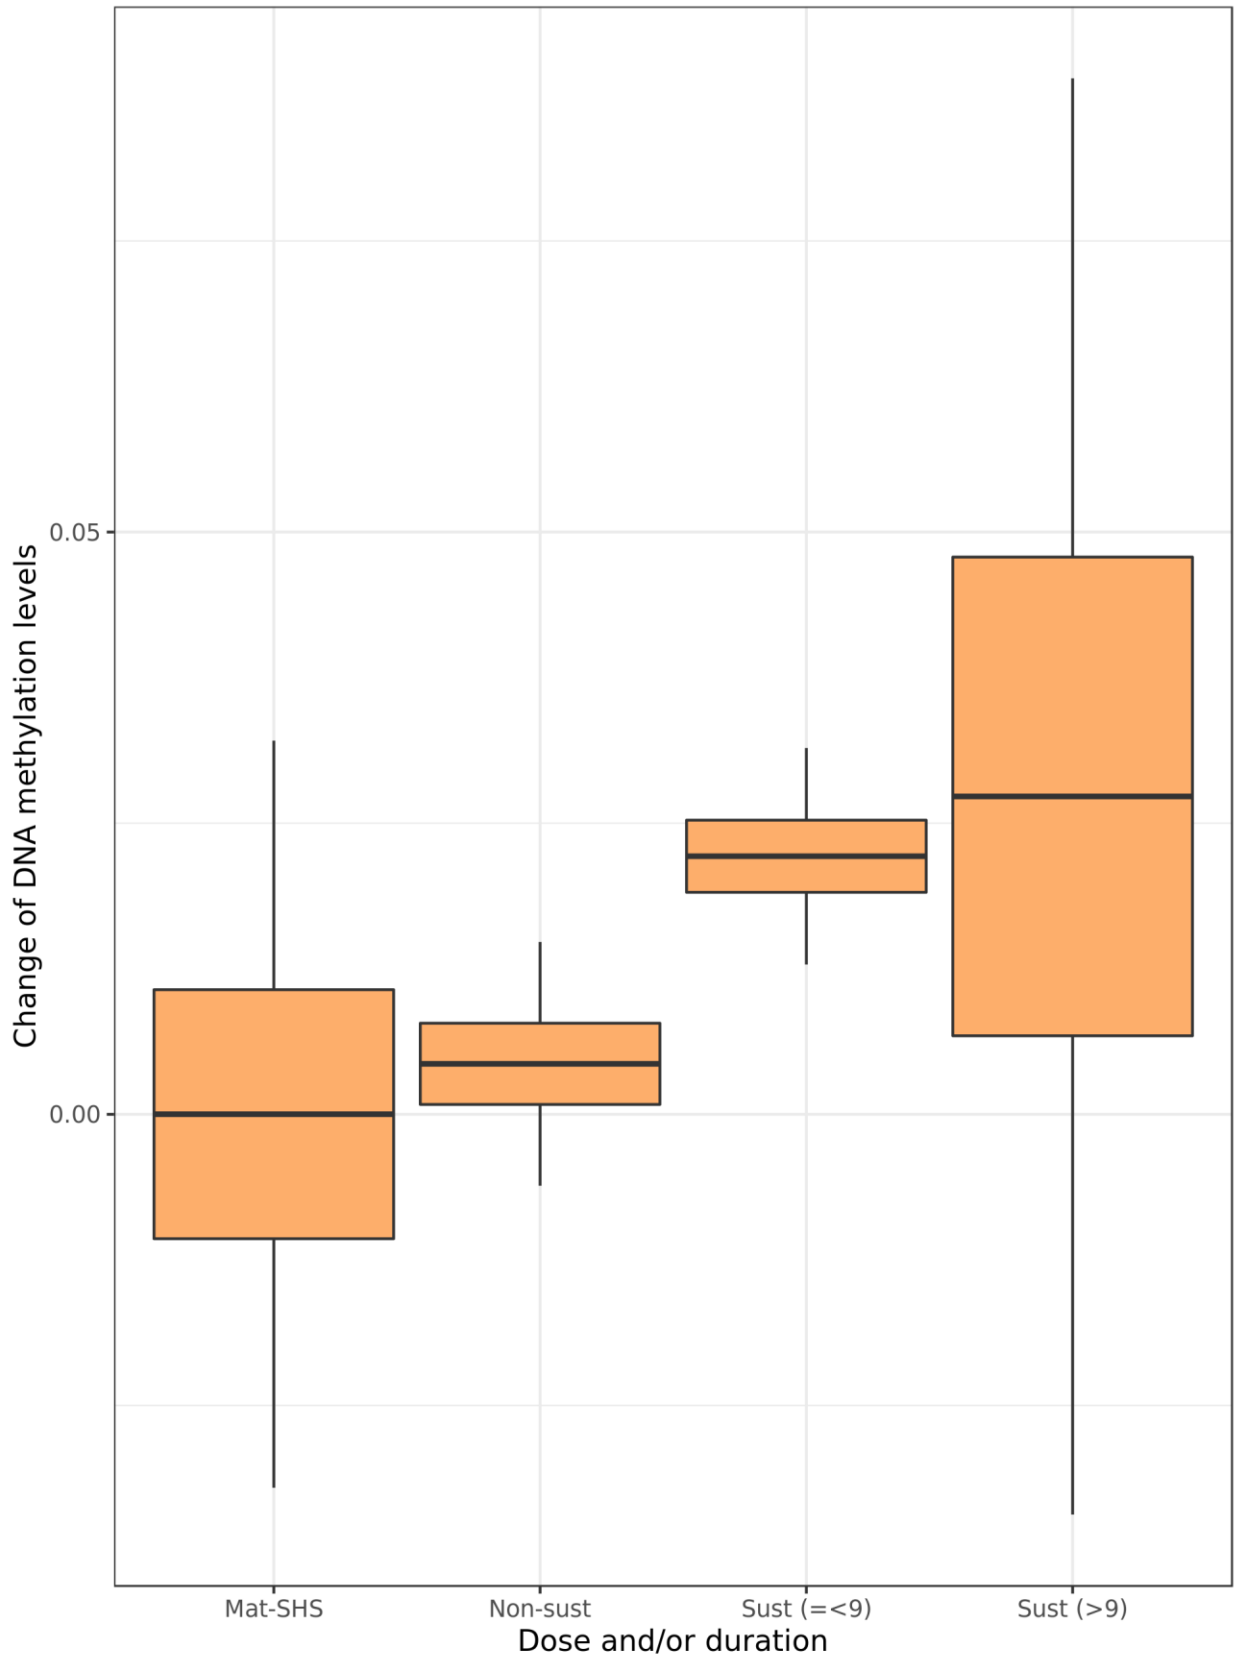



cg11207515

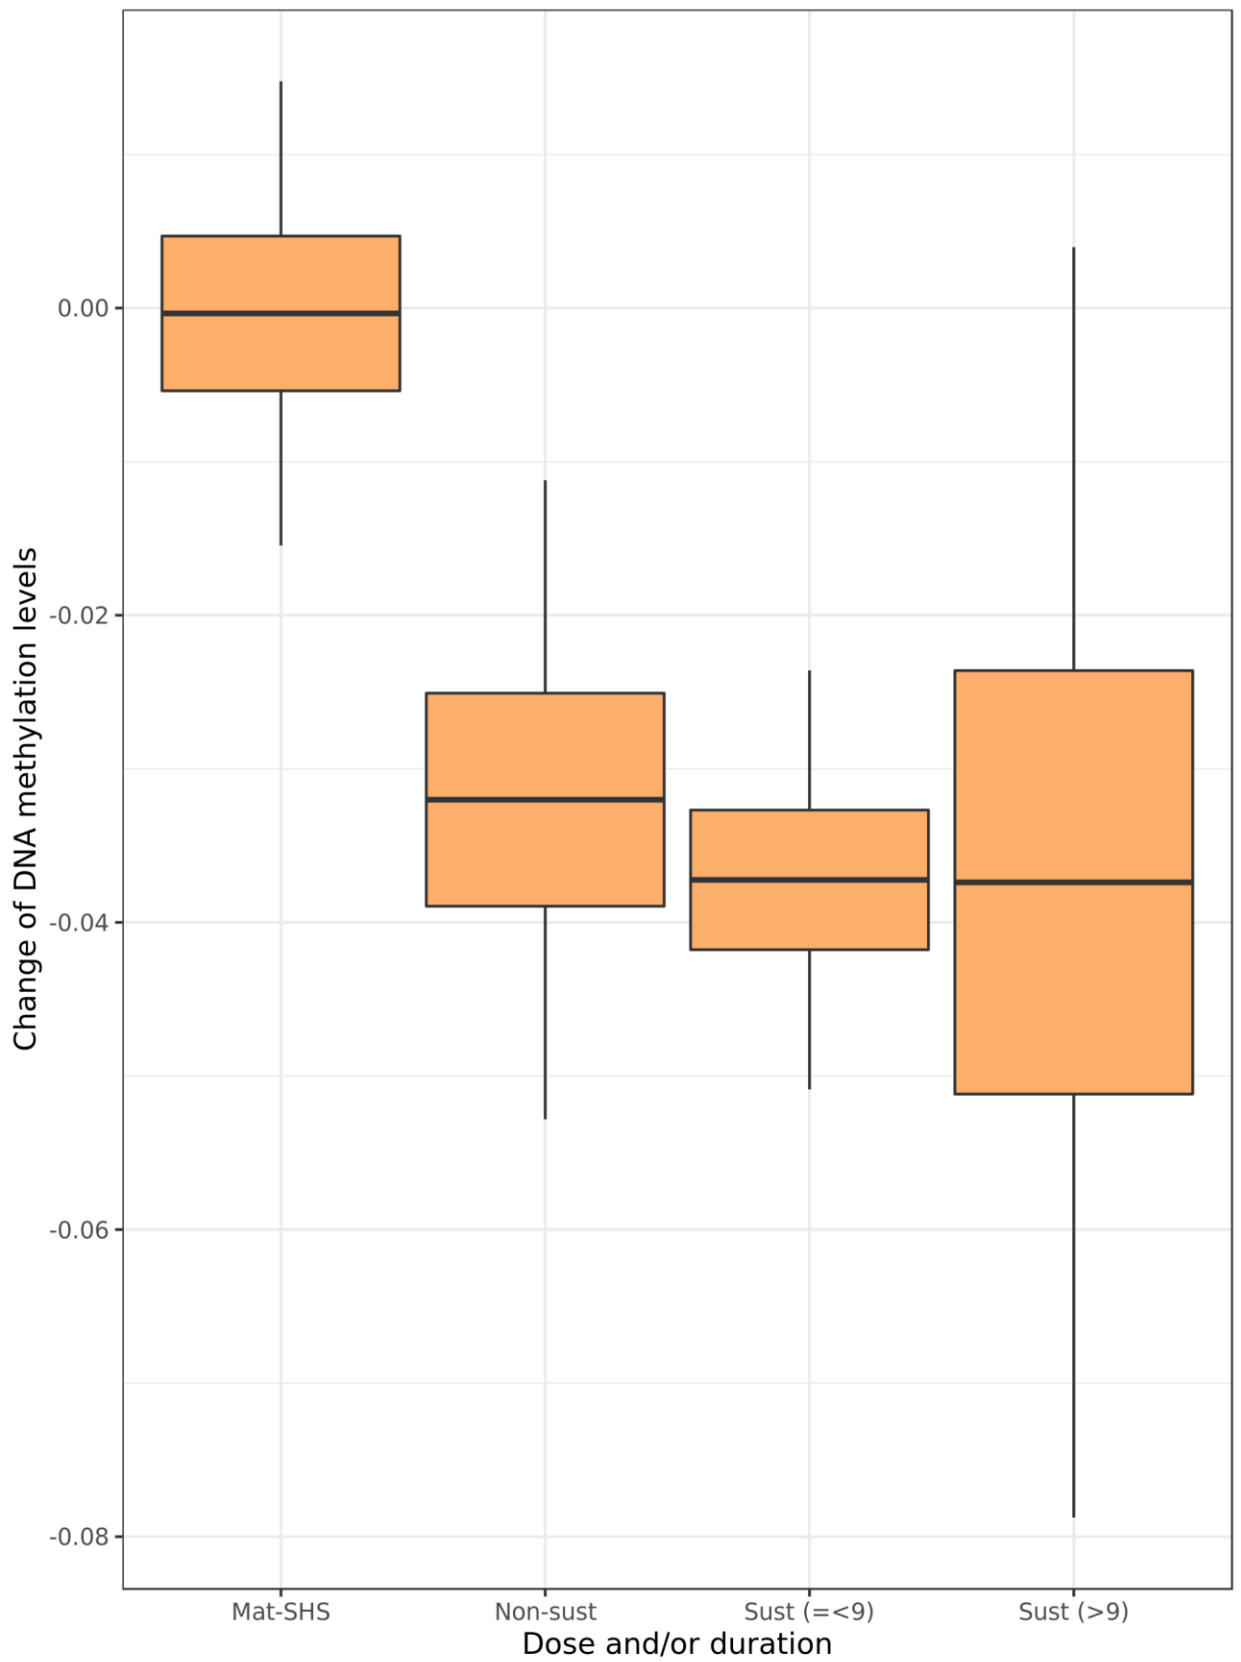

cg09935388

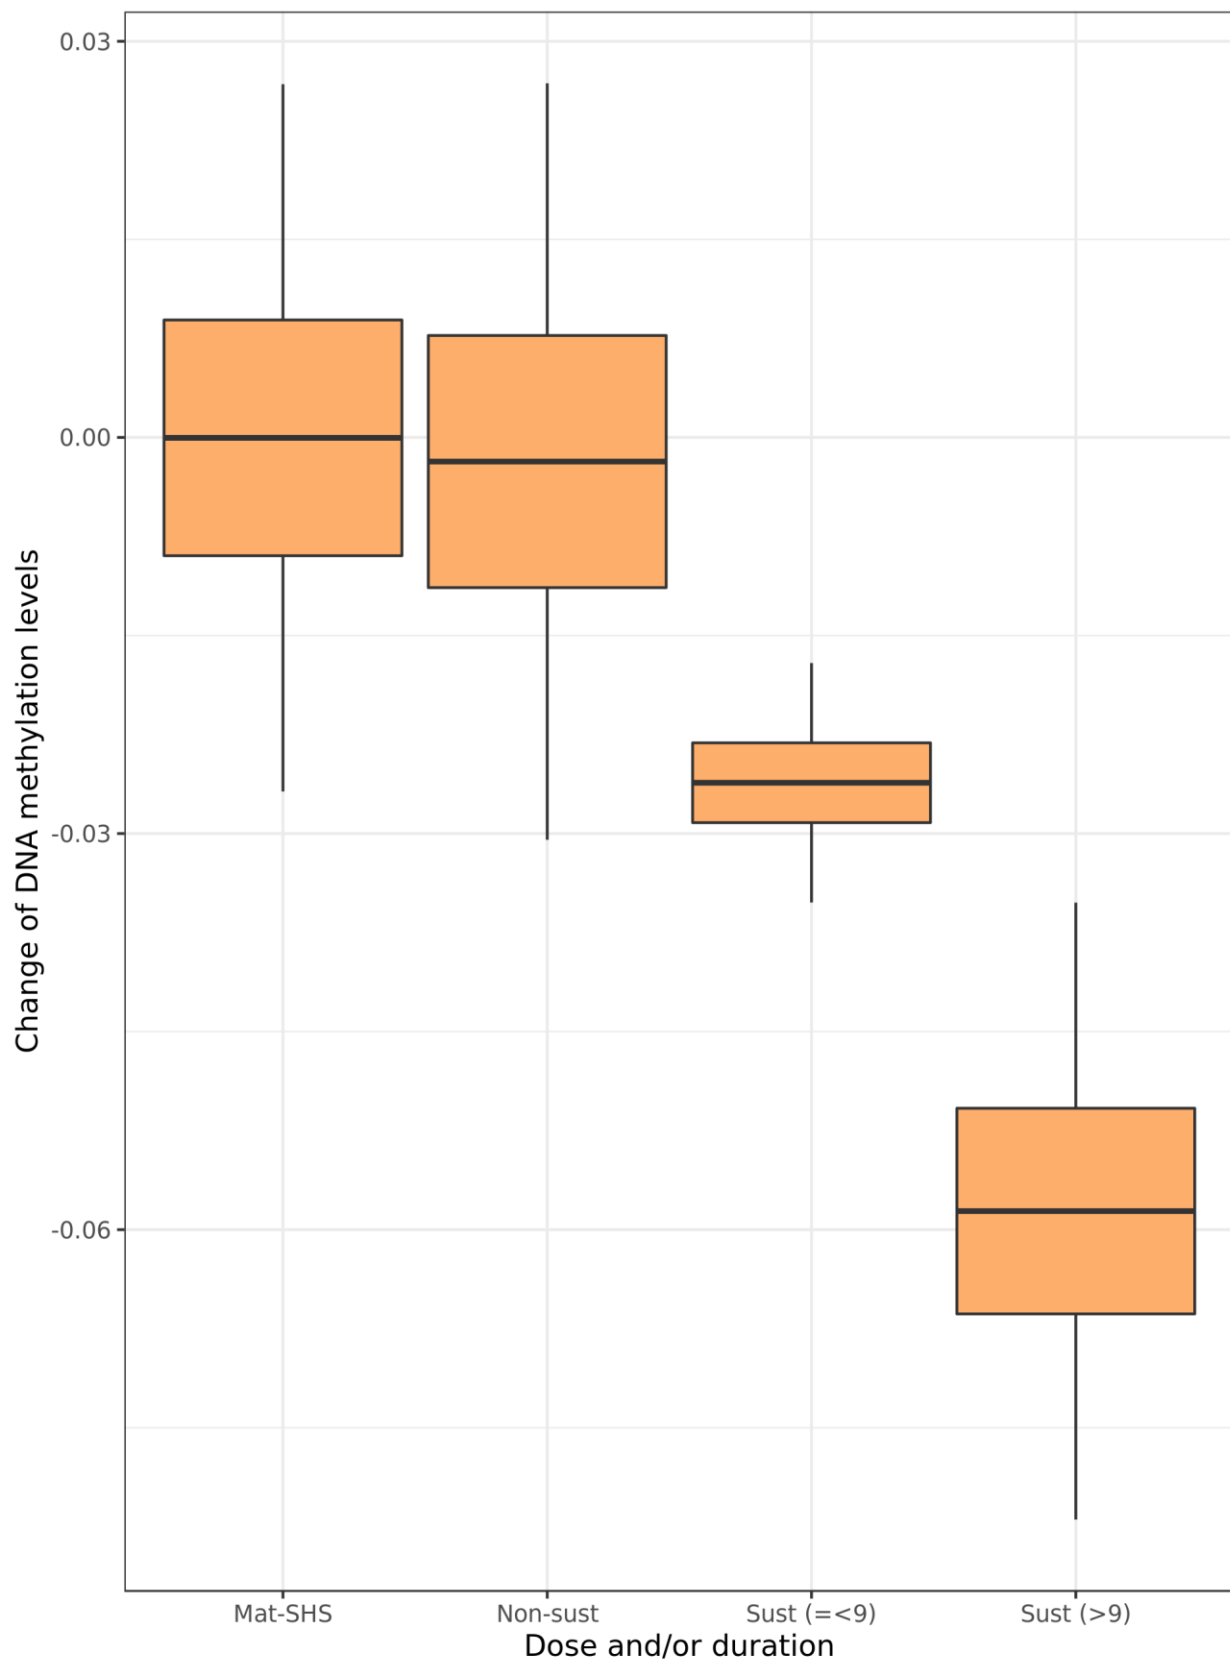

cg07105221

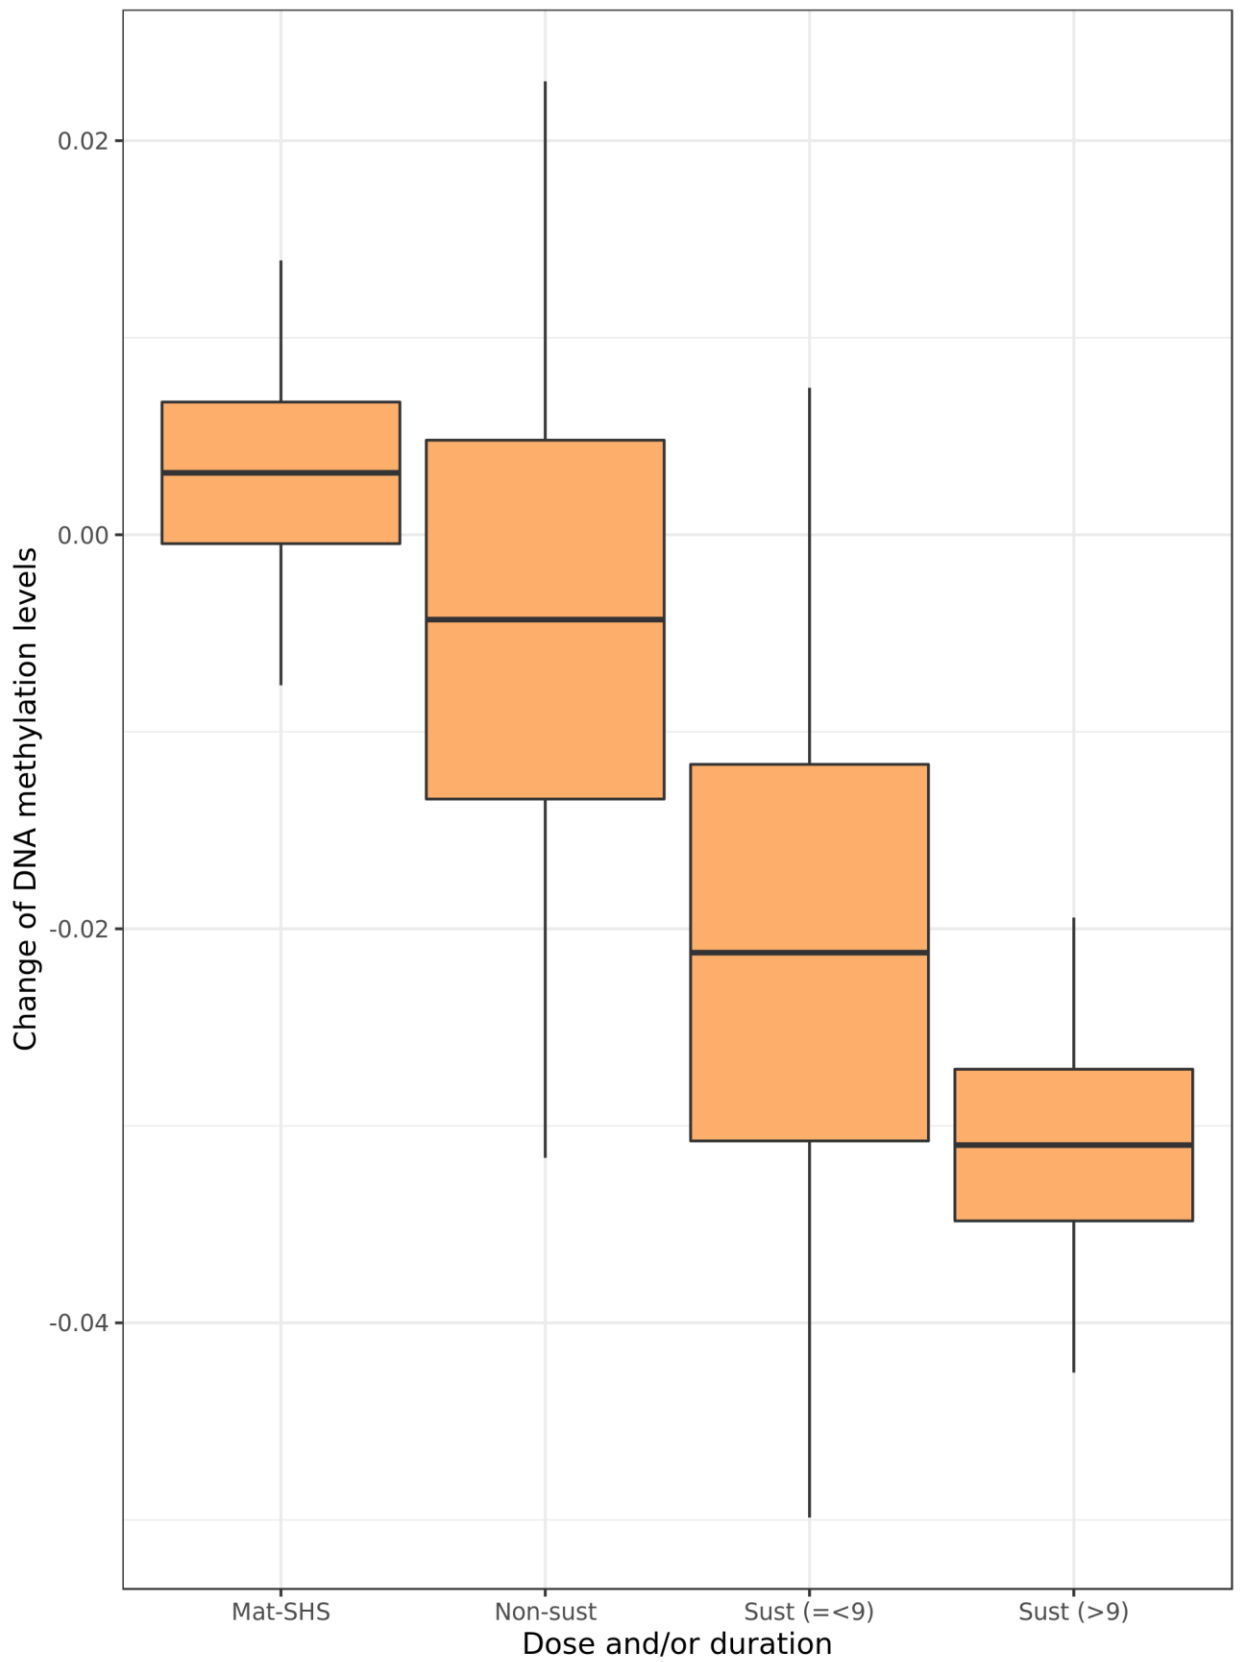

cg05767720

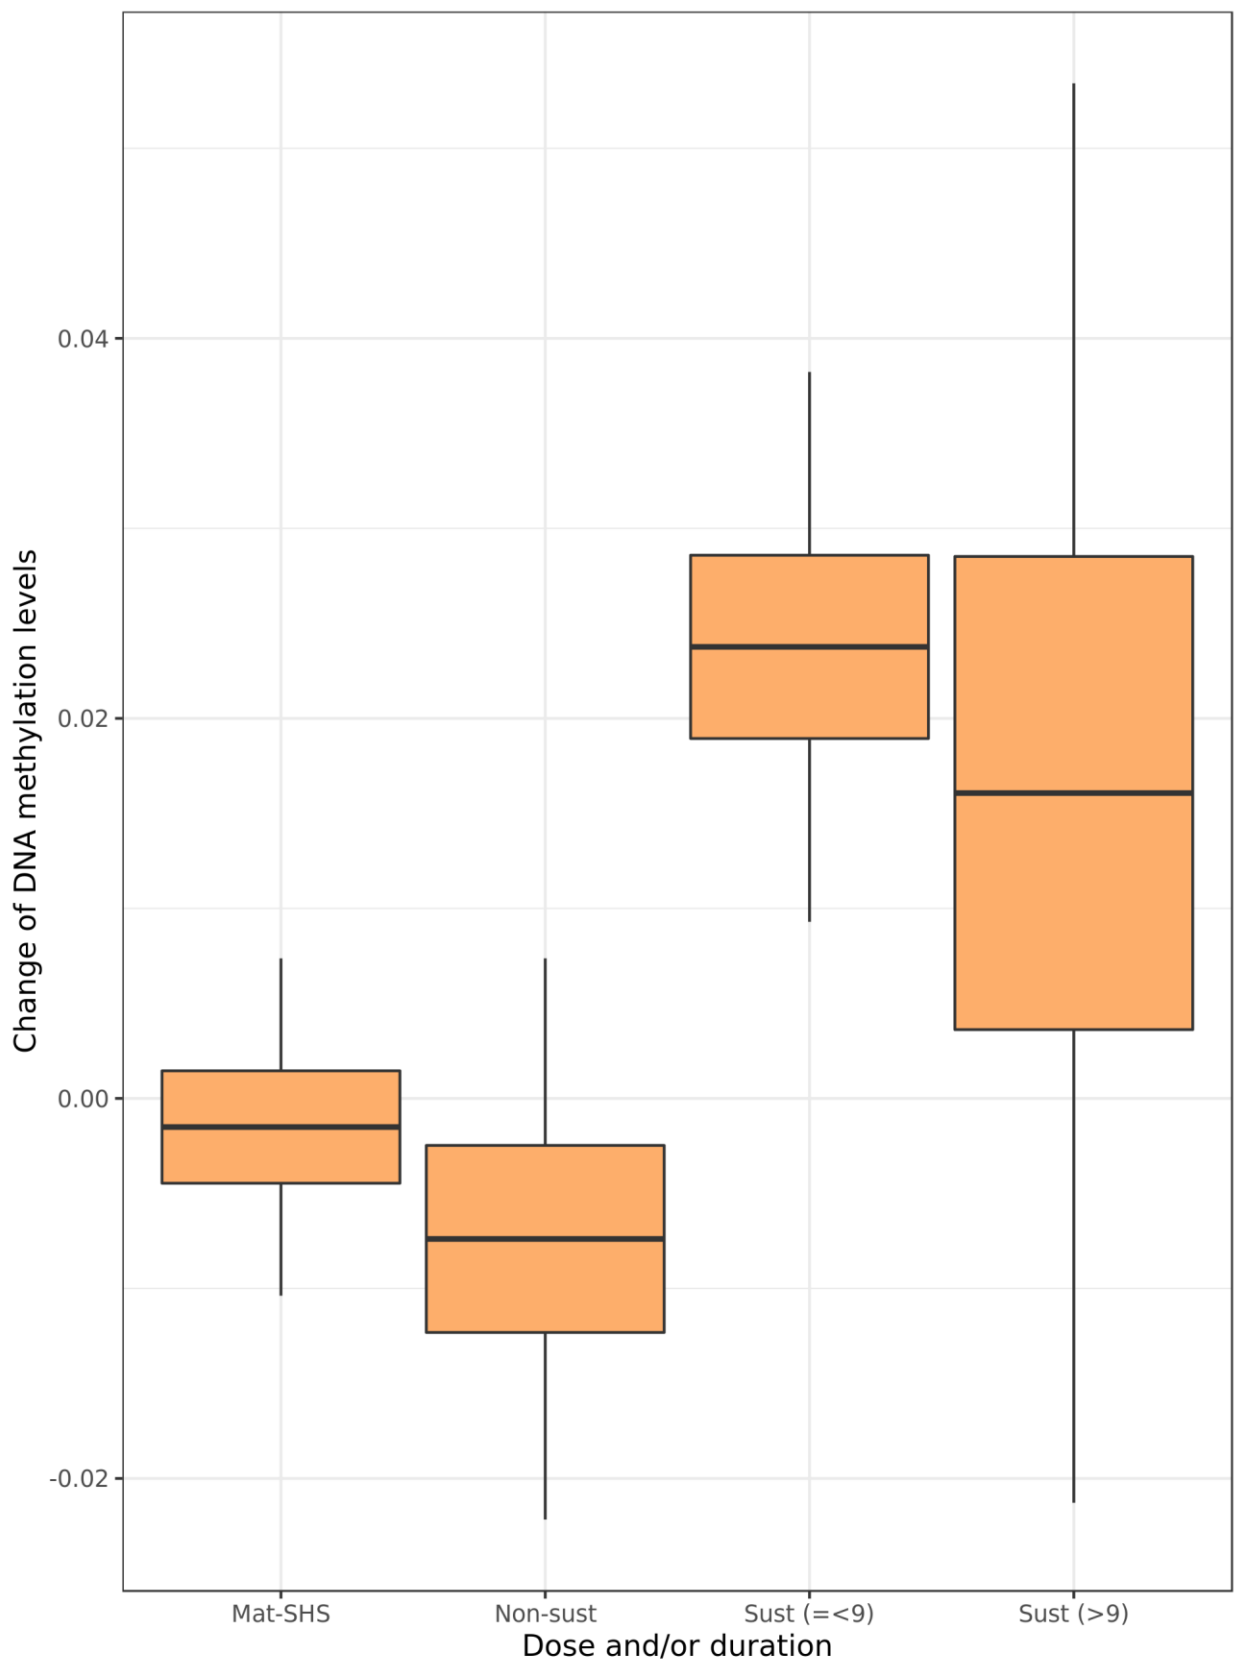

cg05575921

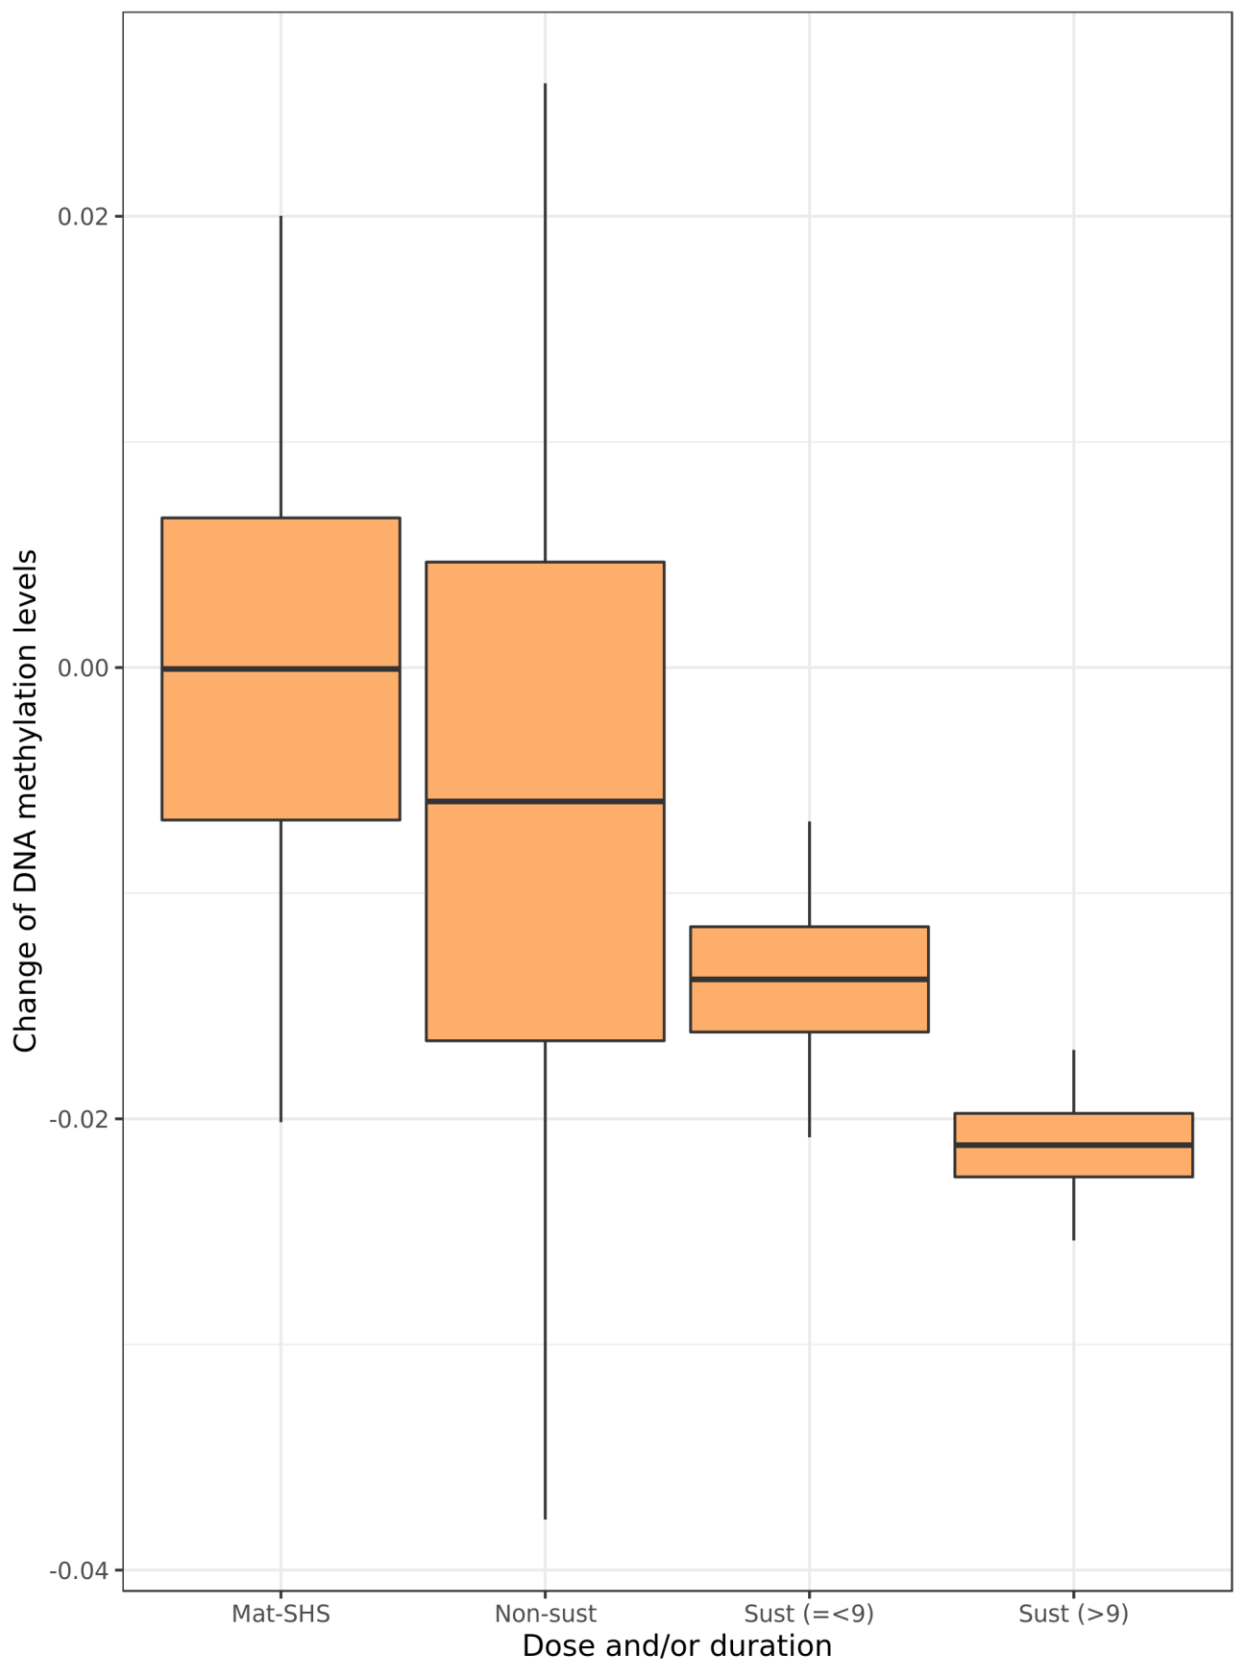

cg05549655

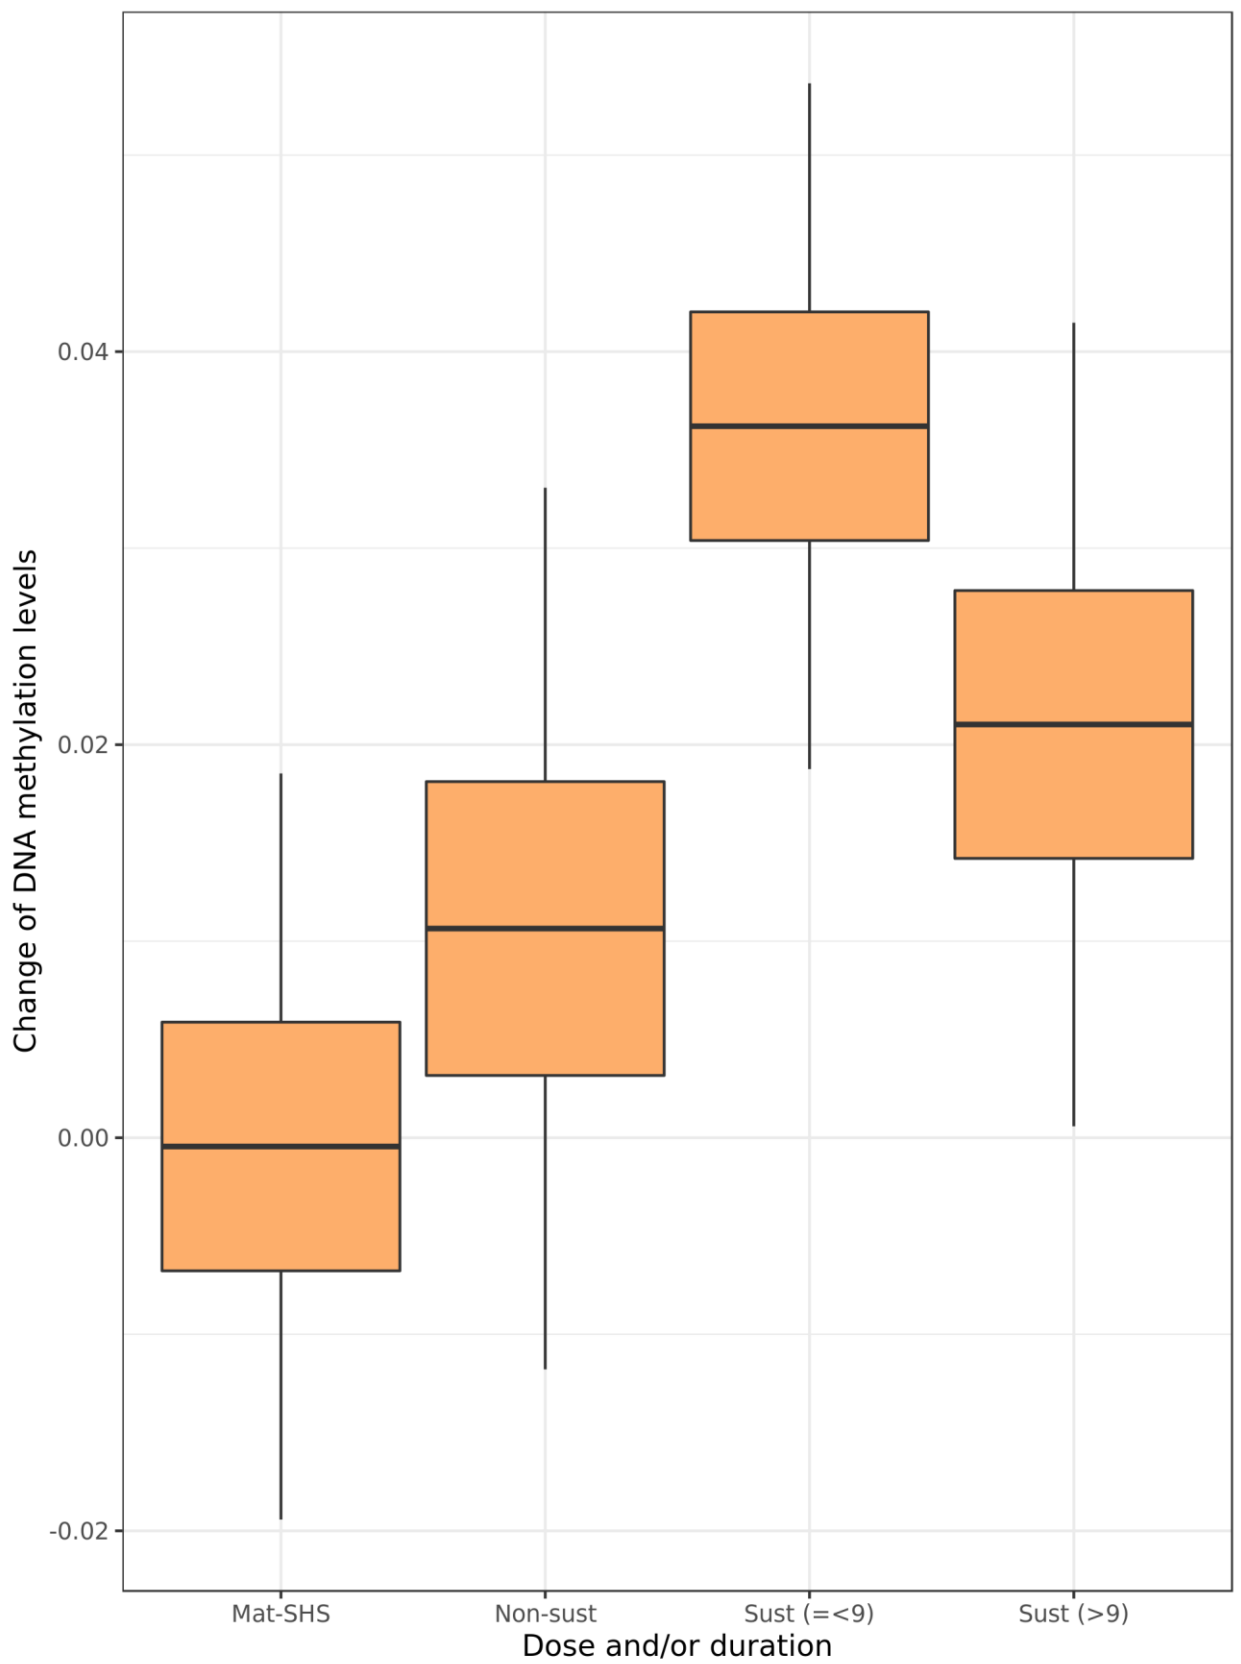

cg04598670

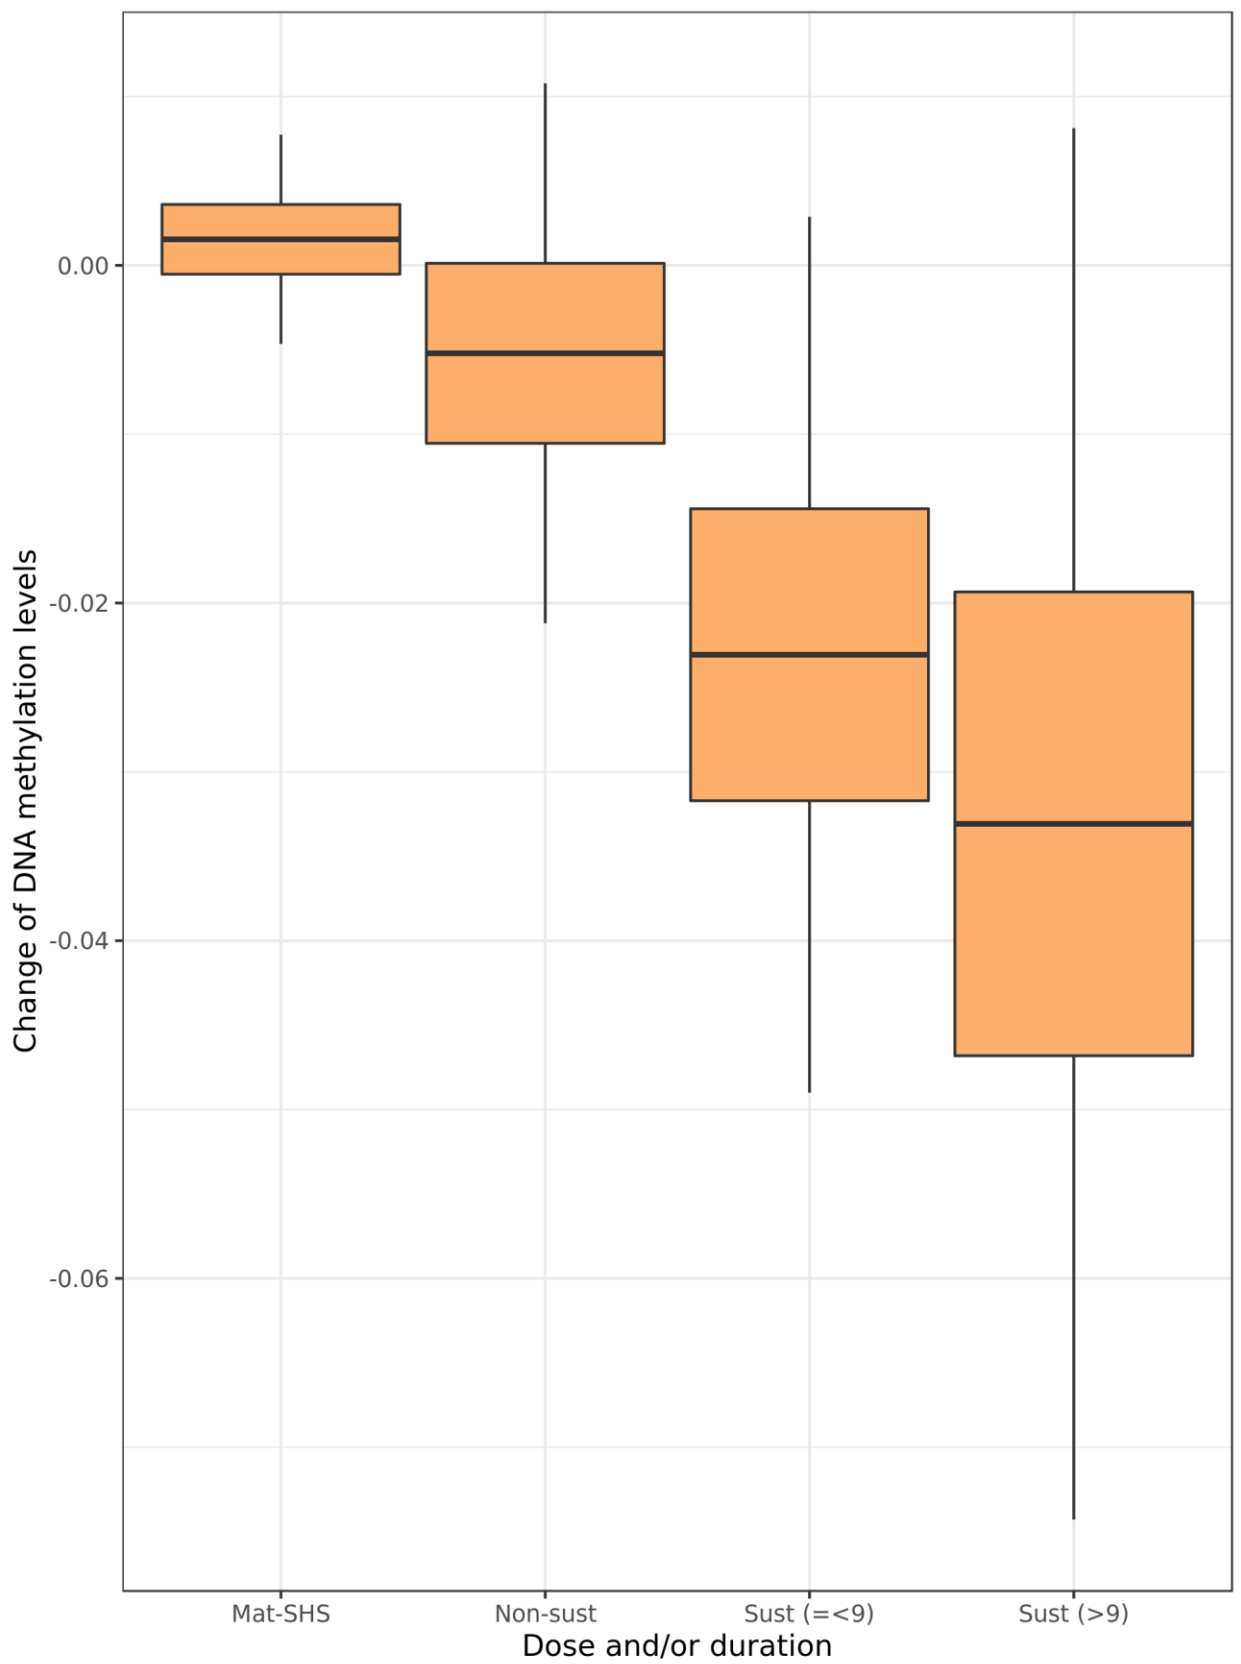

cg04180046

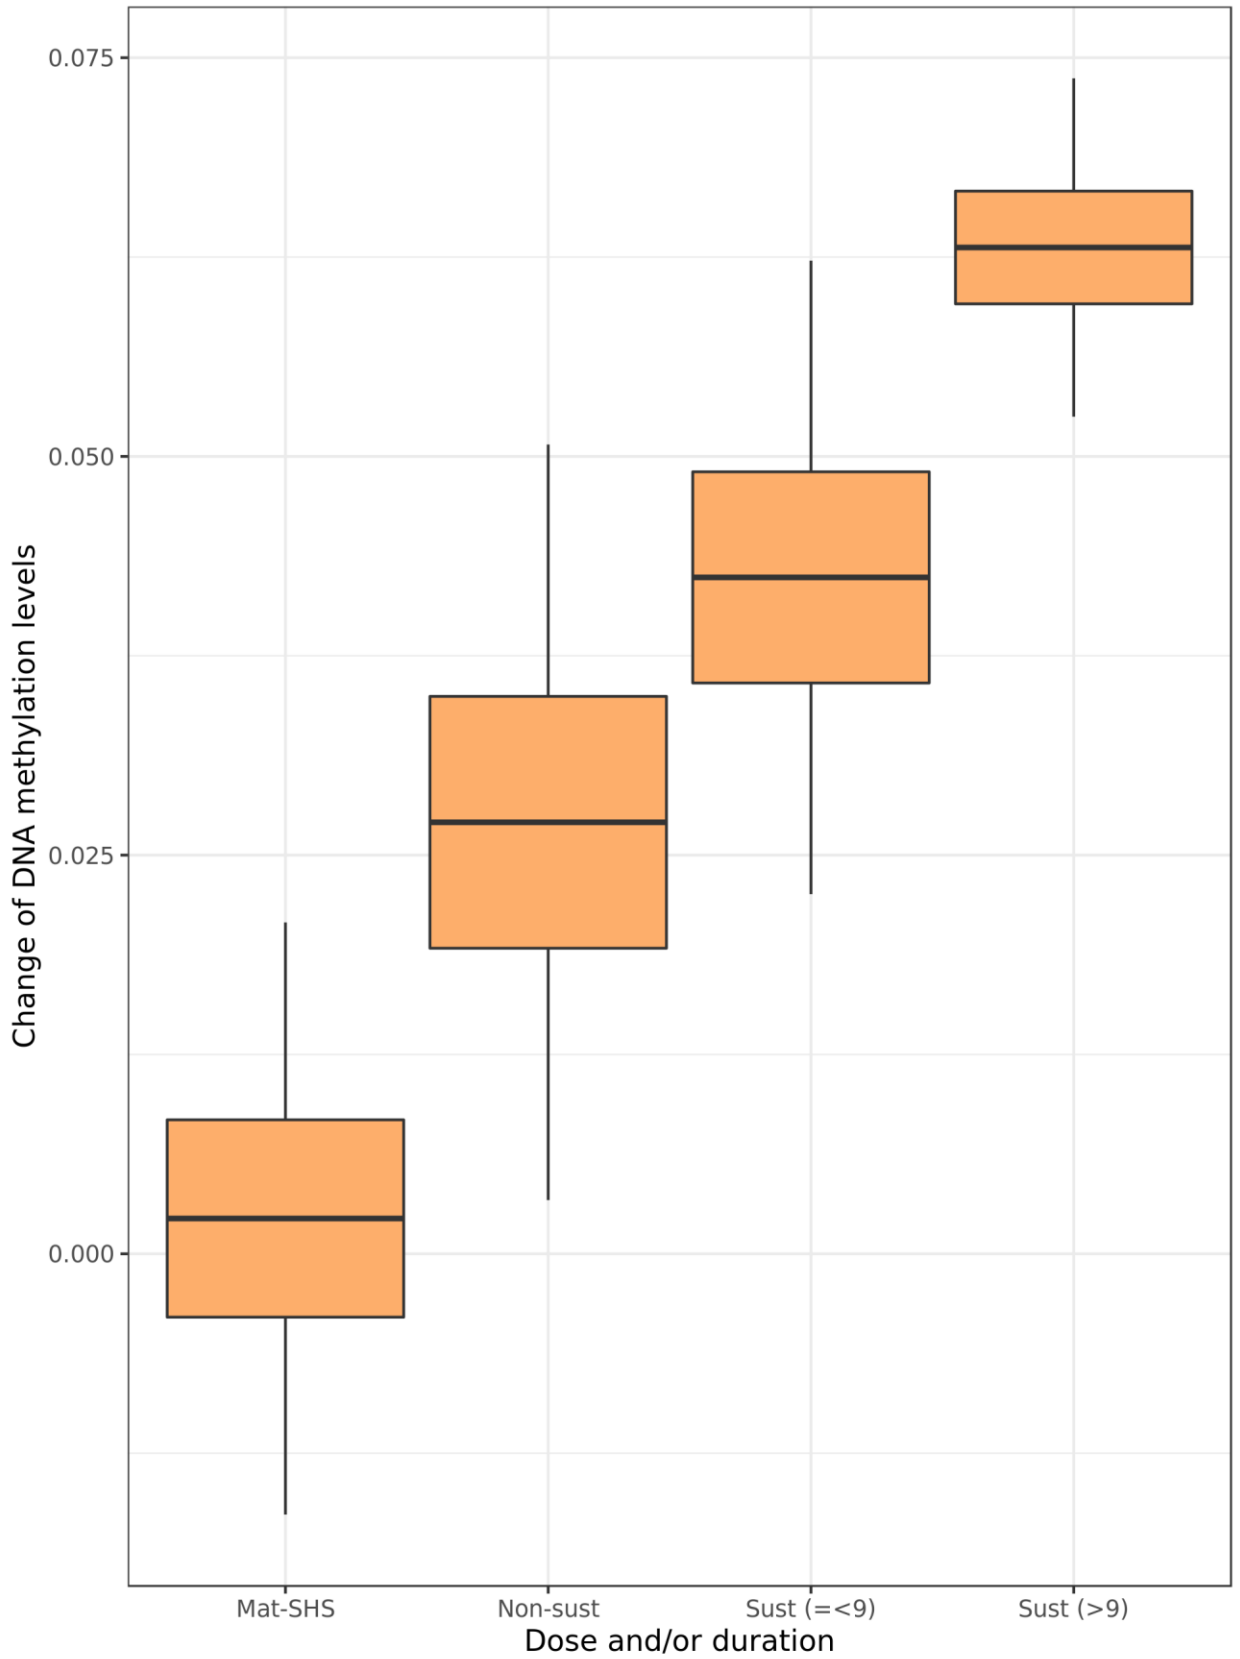



cg03142697

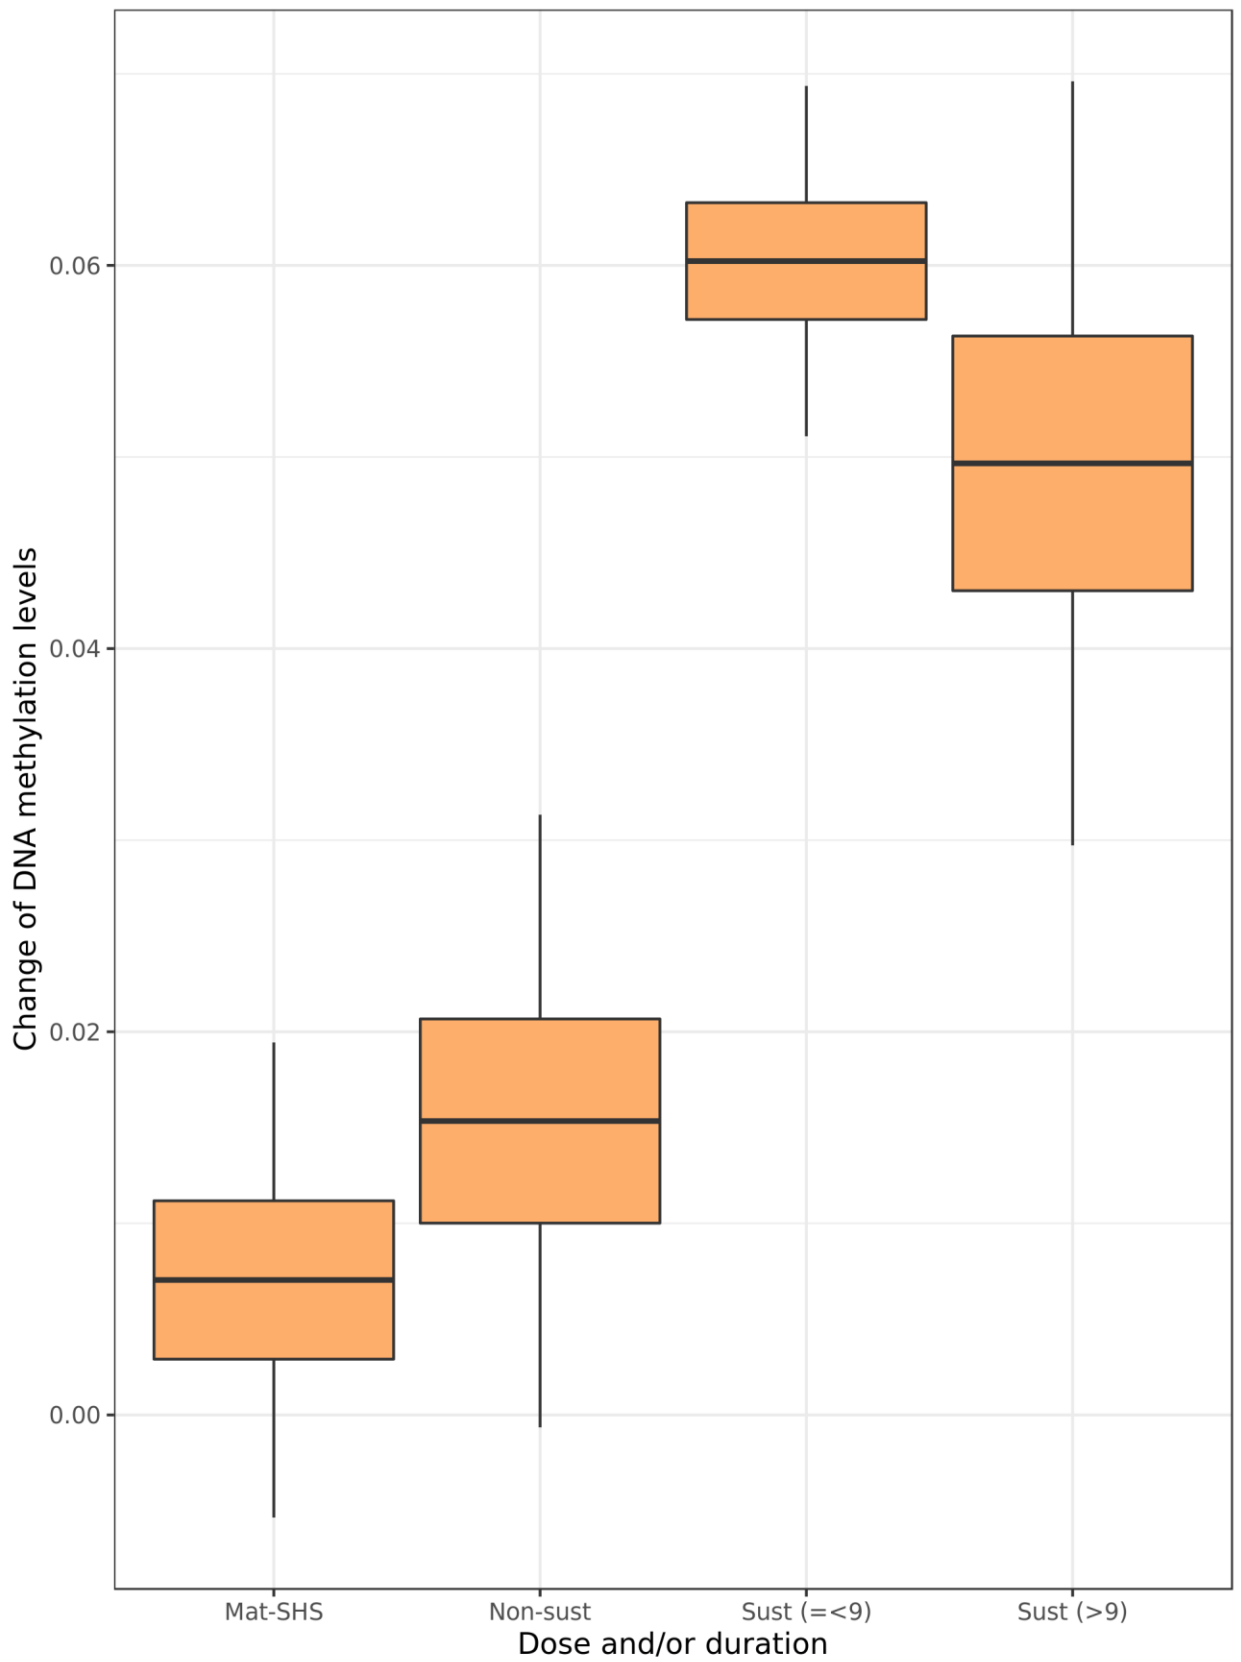

cg02869559

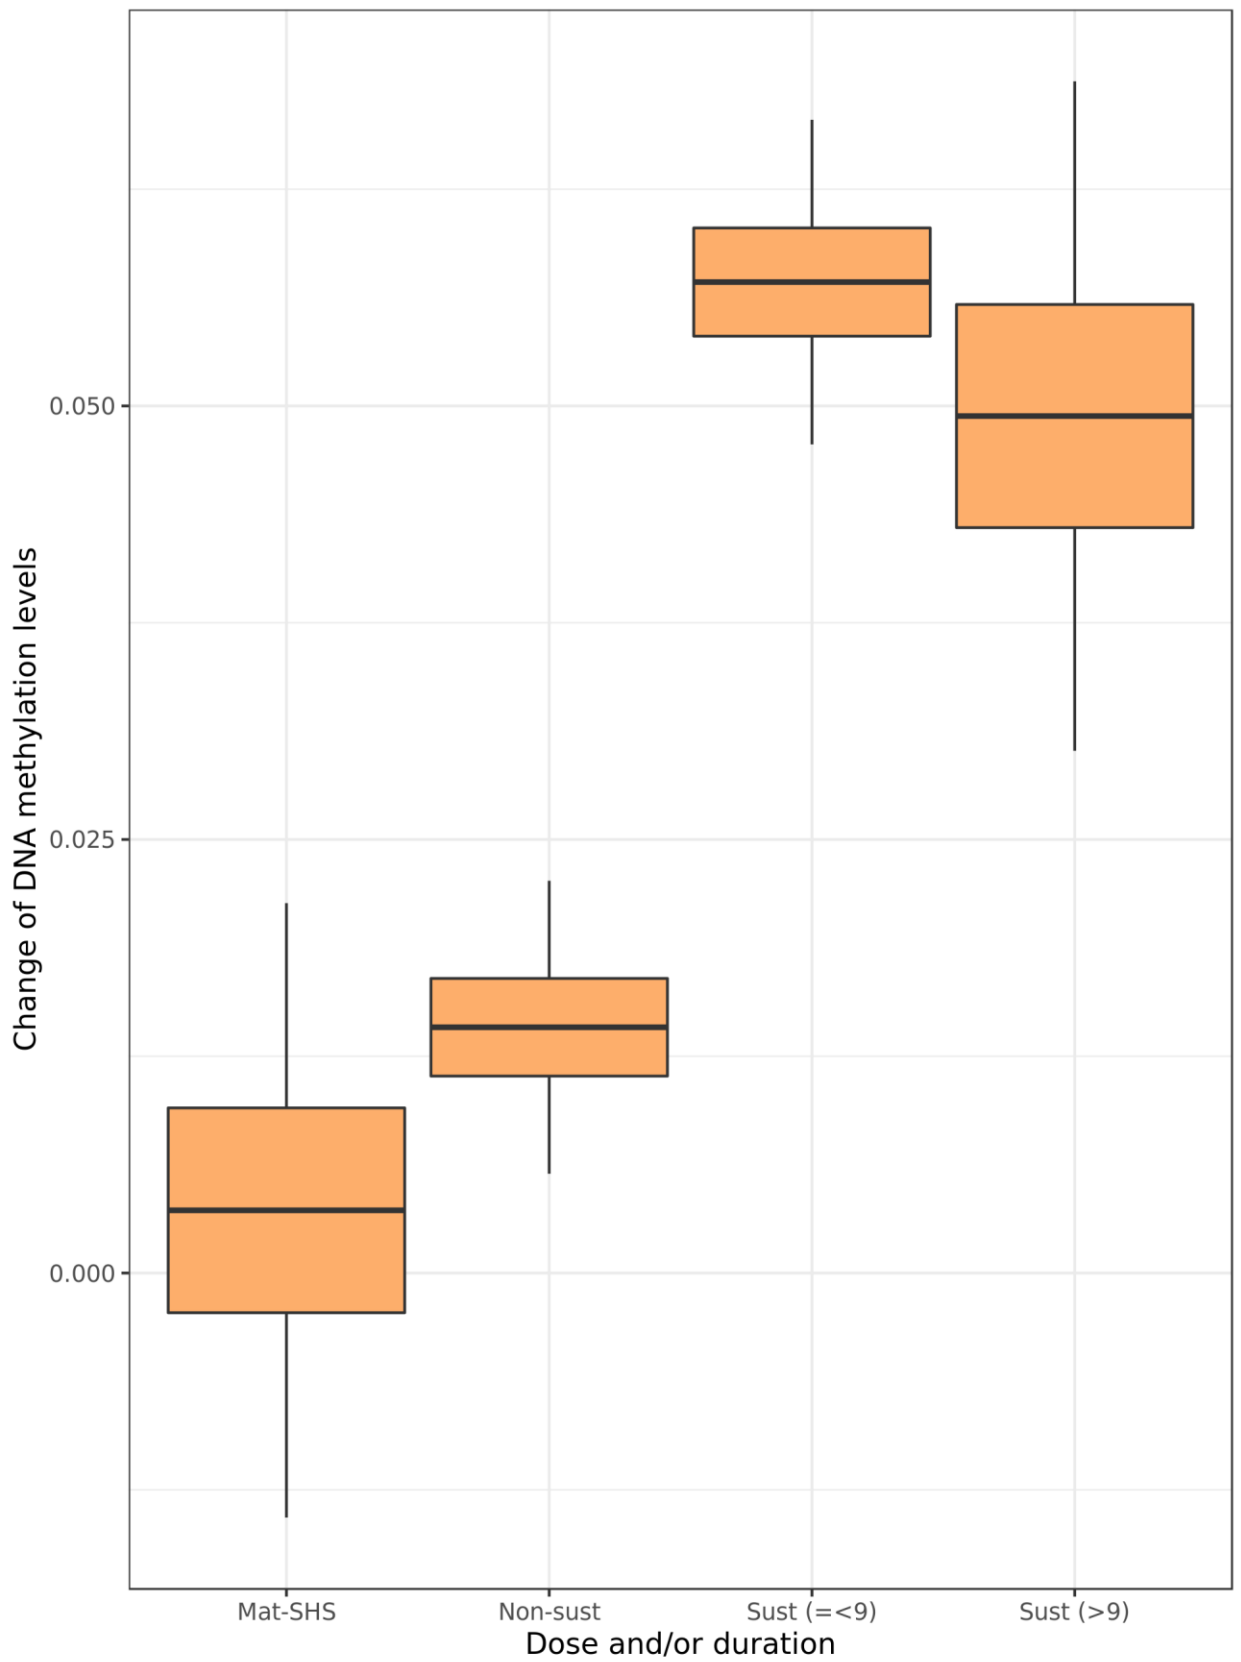

cg01876548

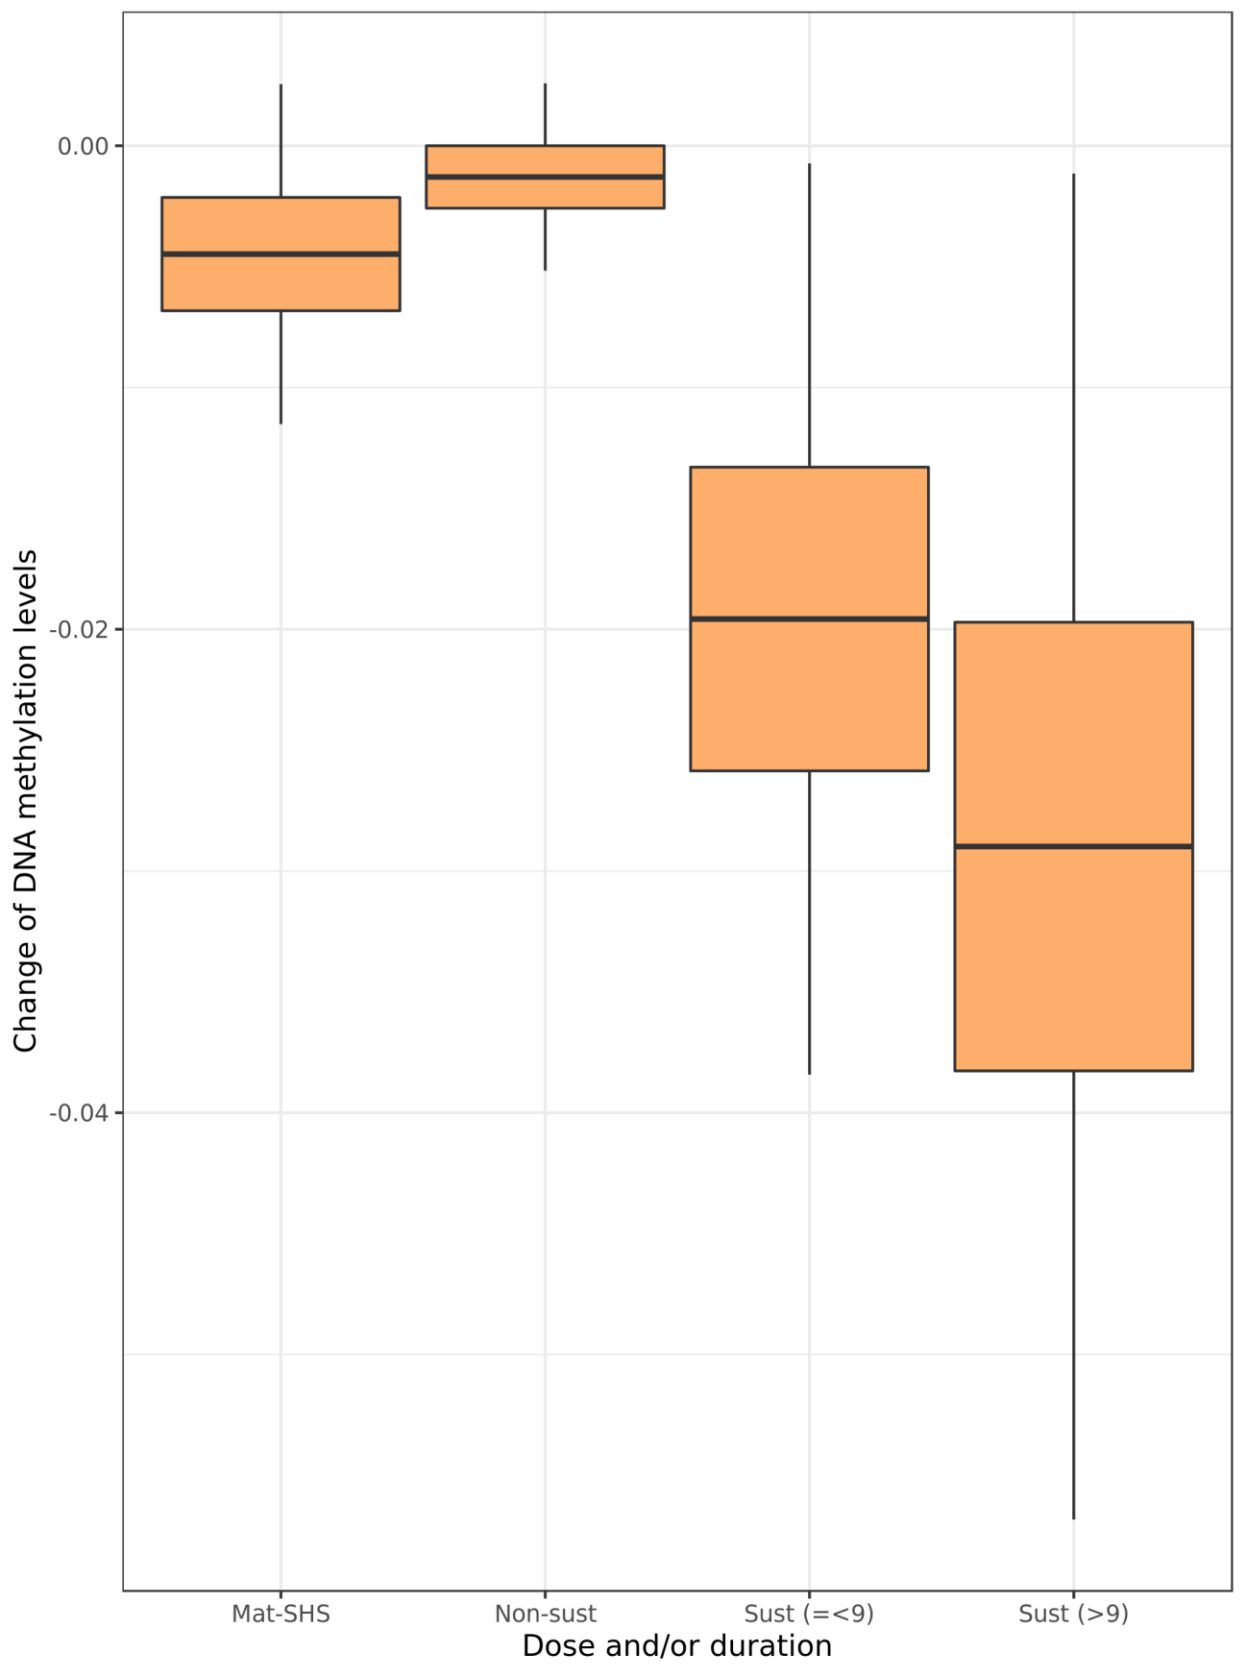

cg01664727

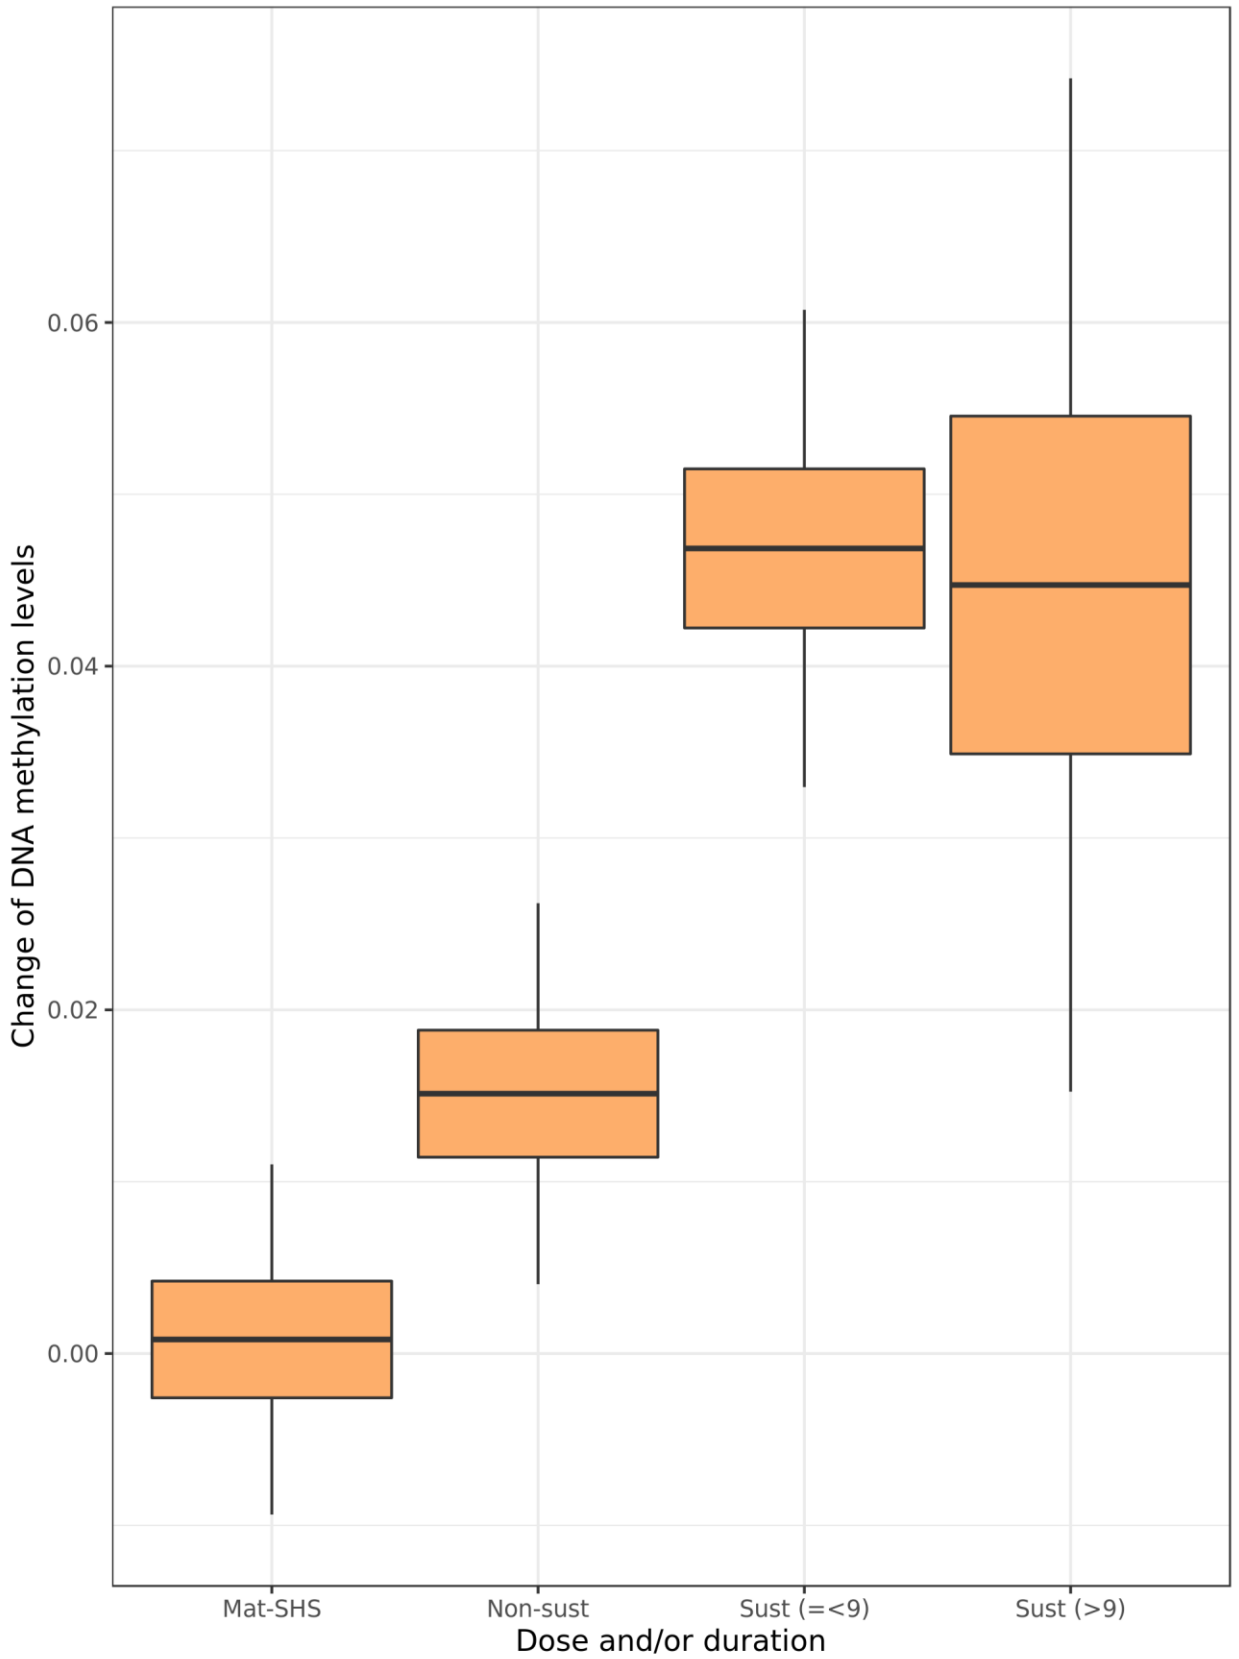

cg00994804

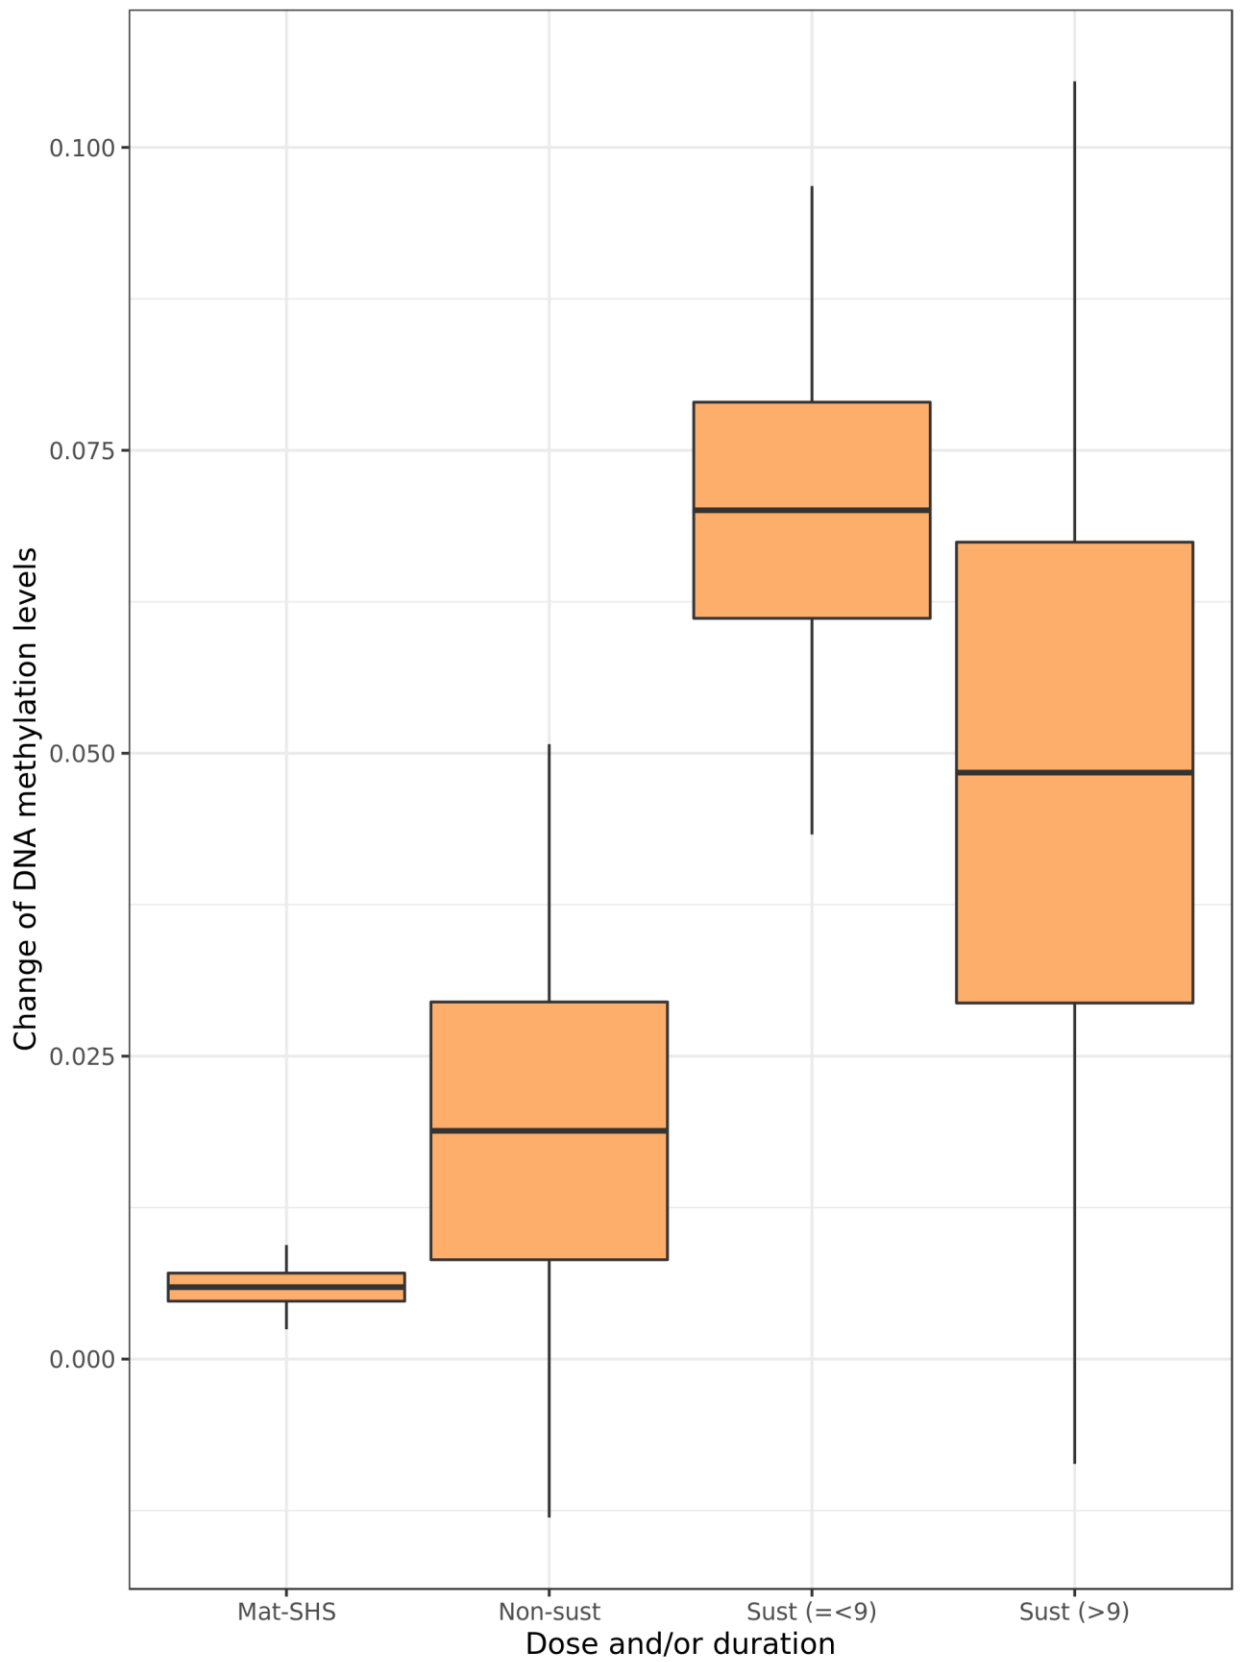

cg00213123

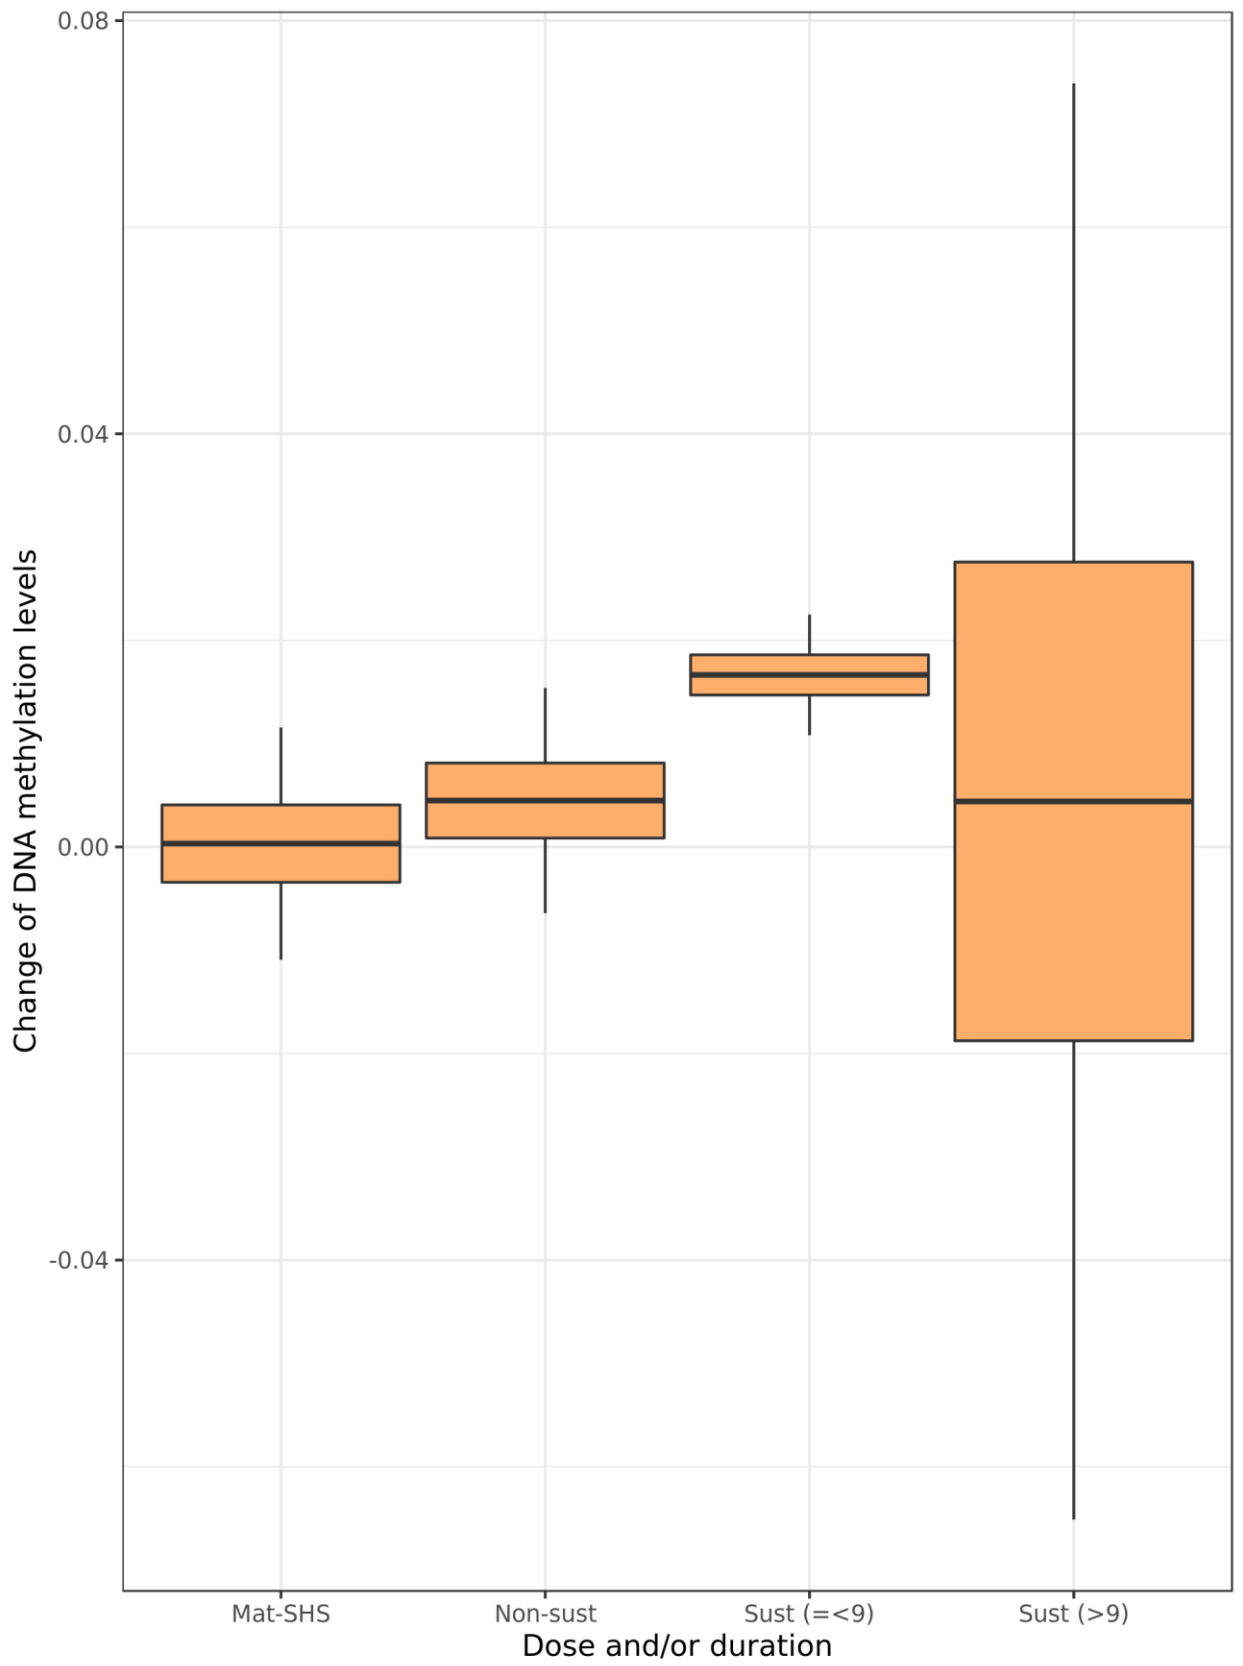

cg26516004

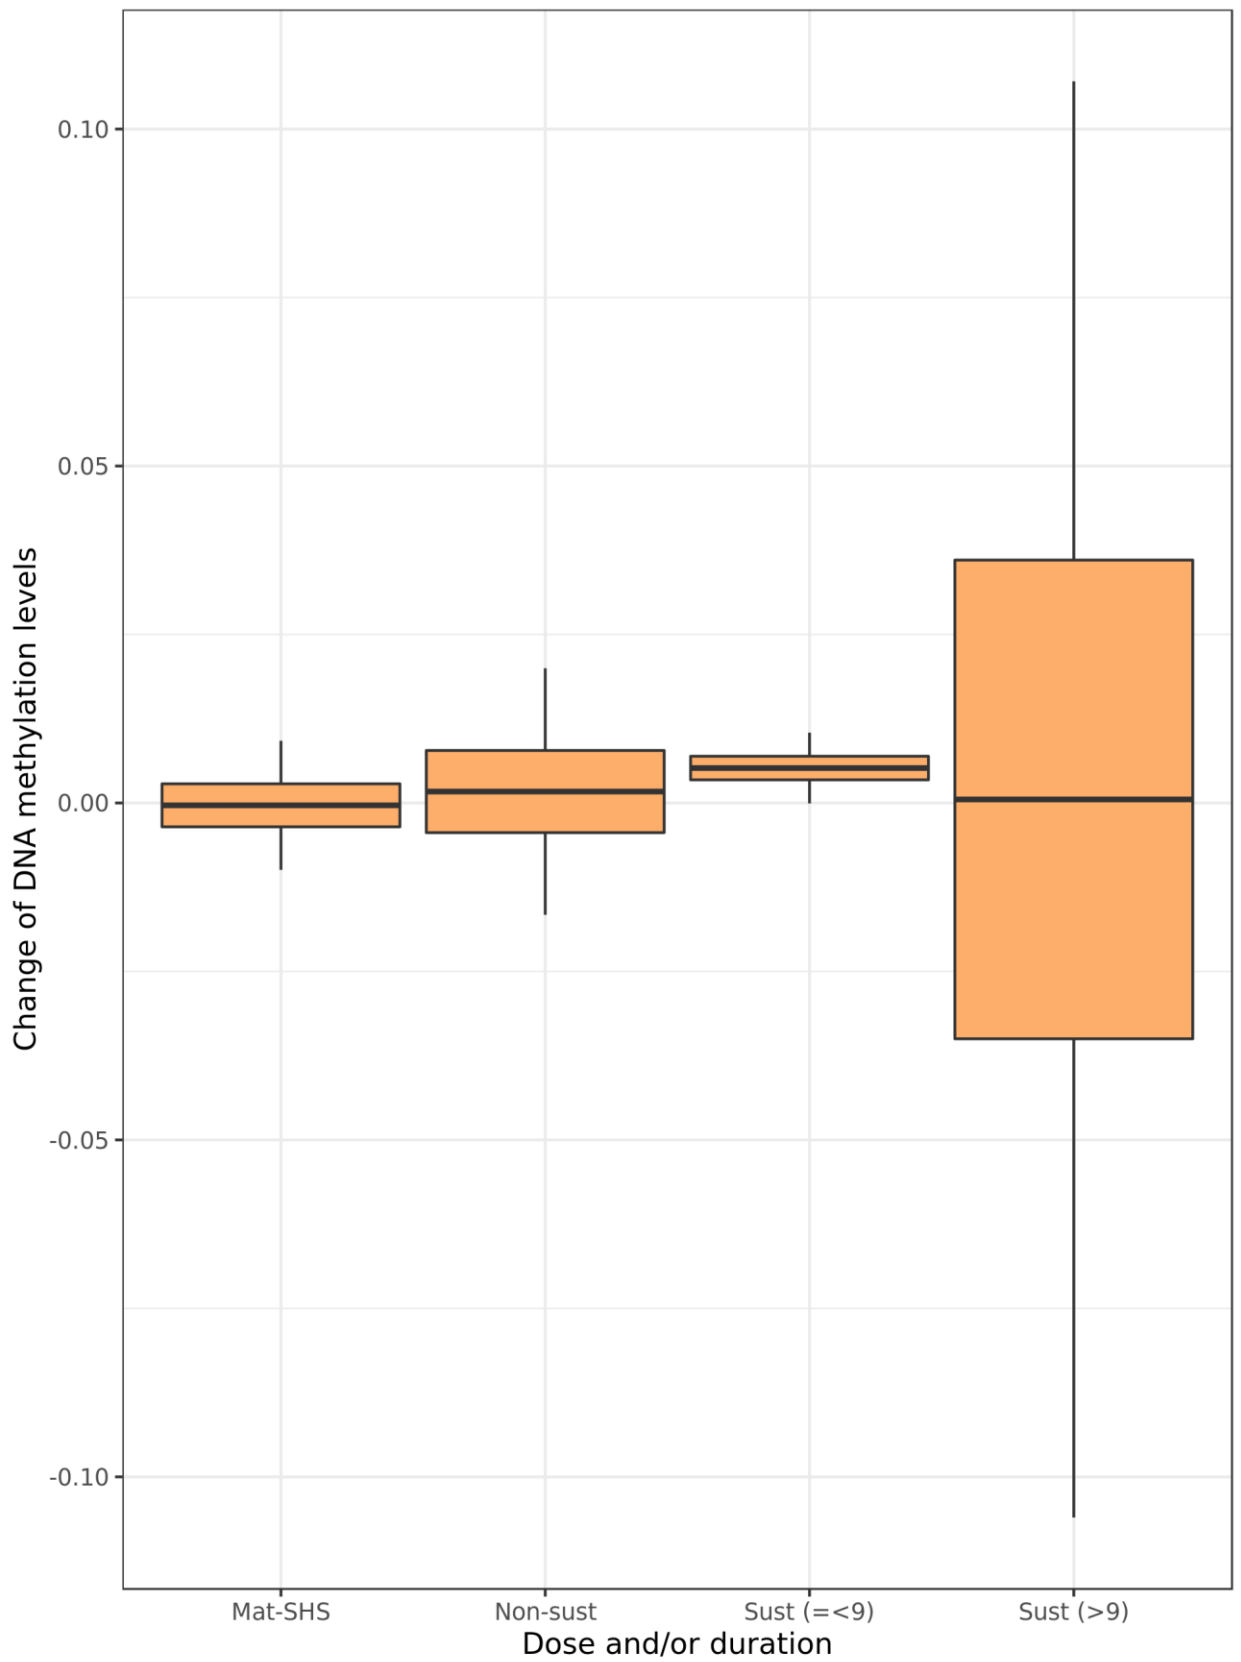

cg25949550

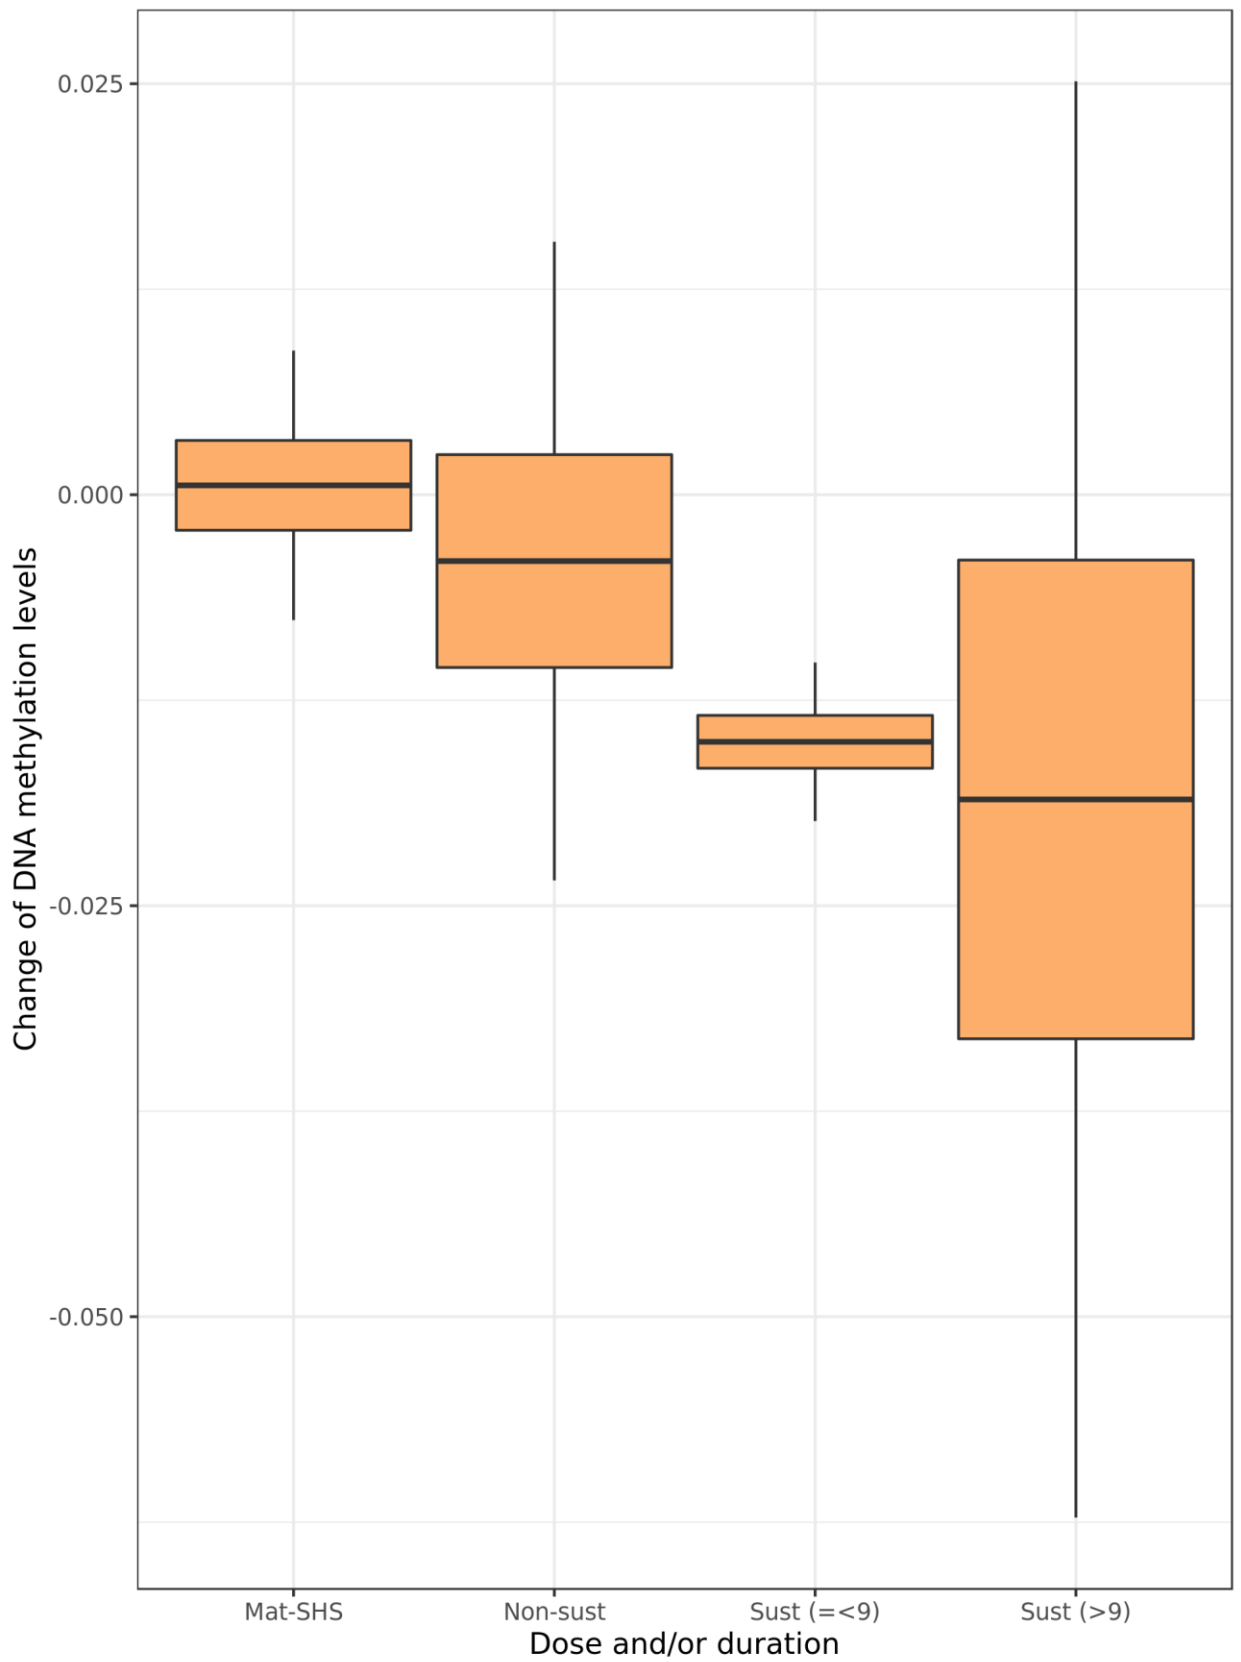



cg25464840

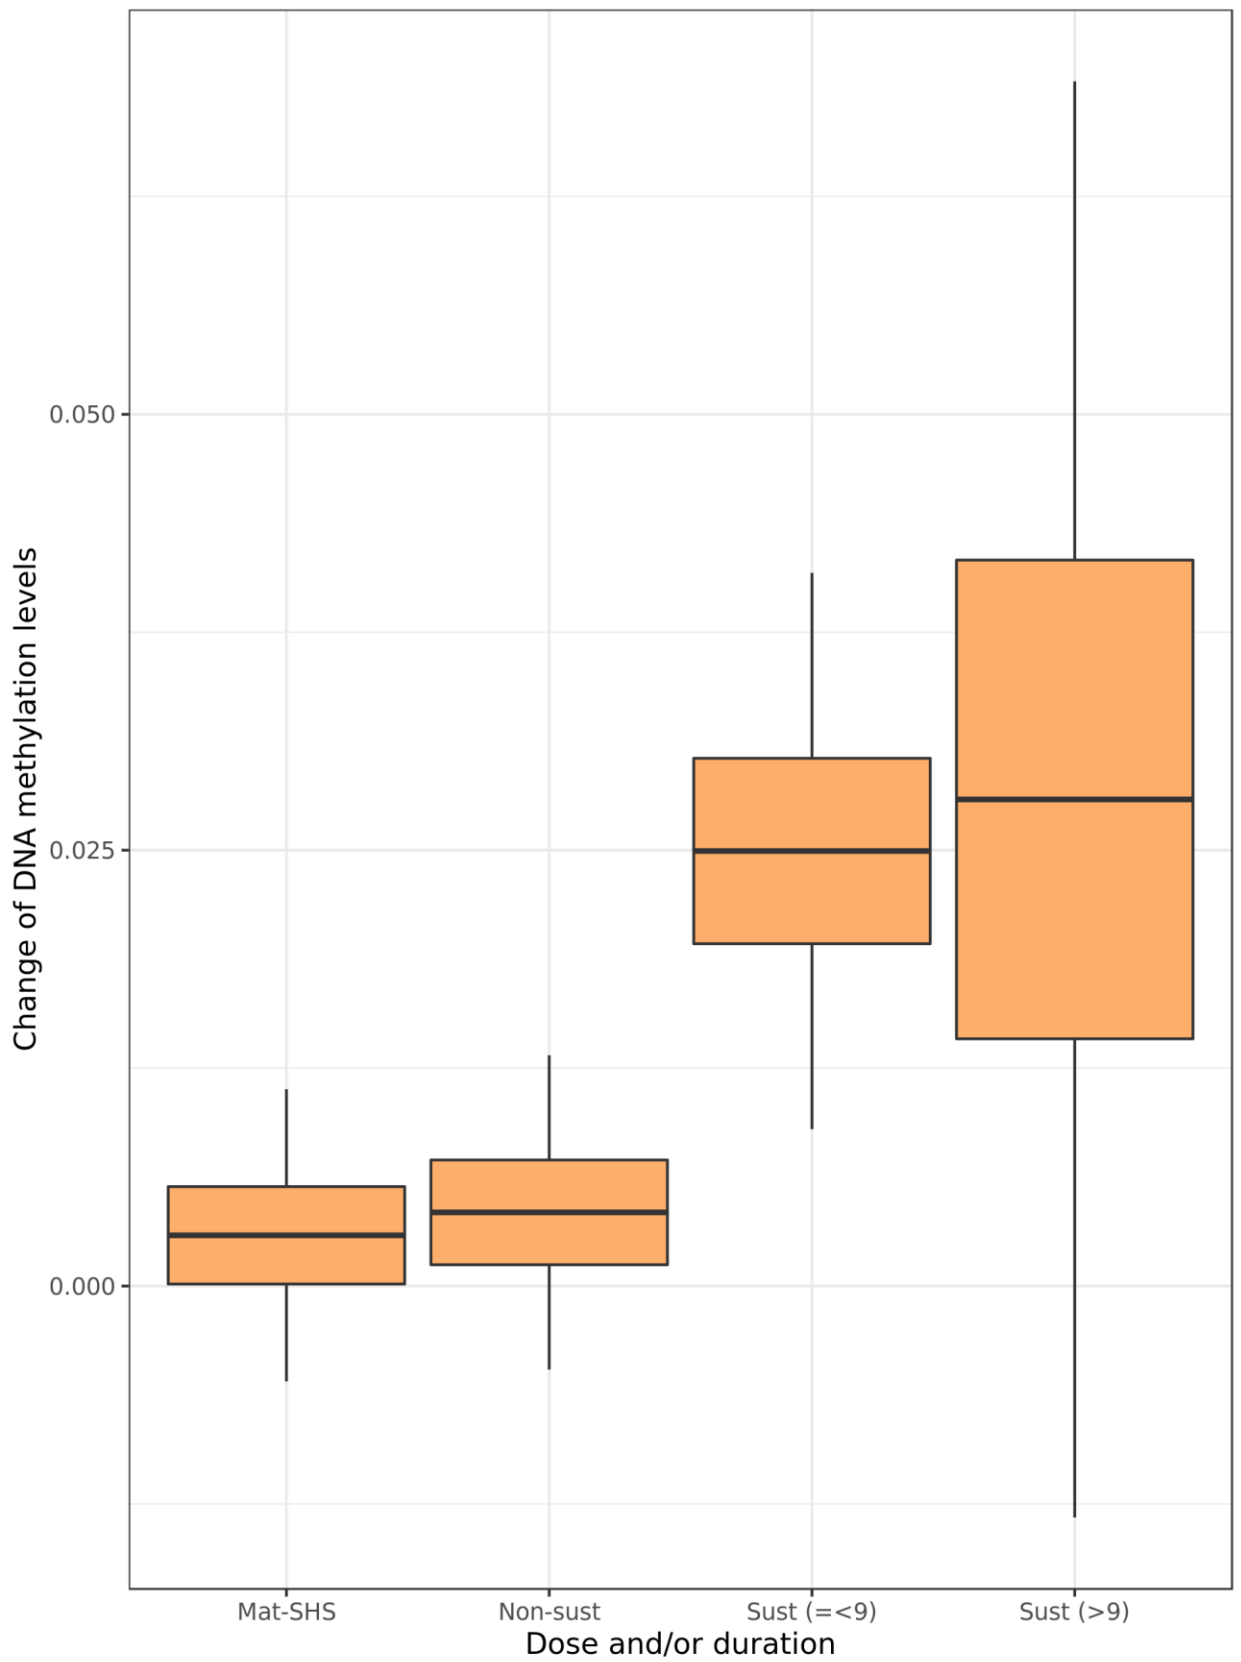

cg25189904

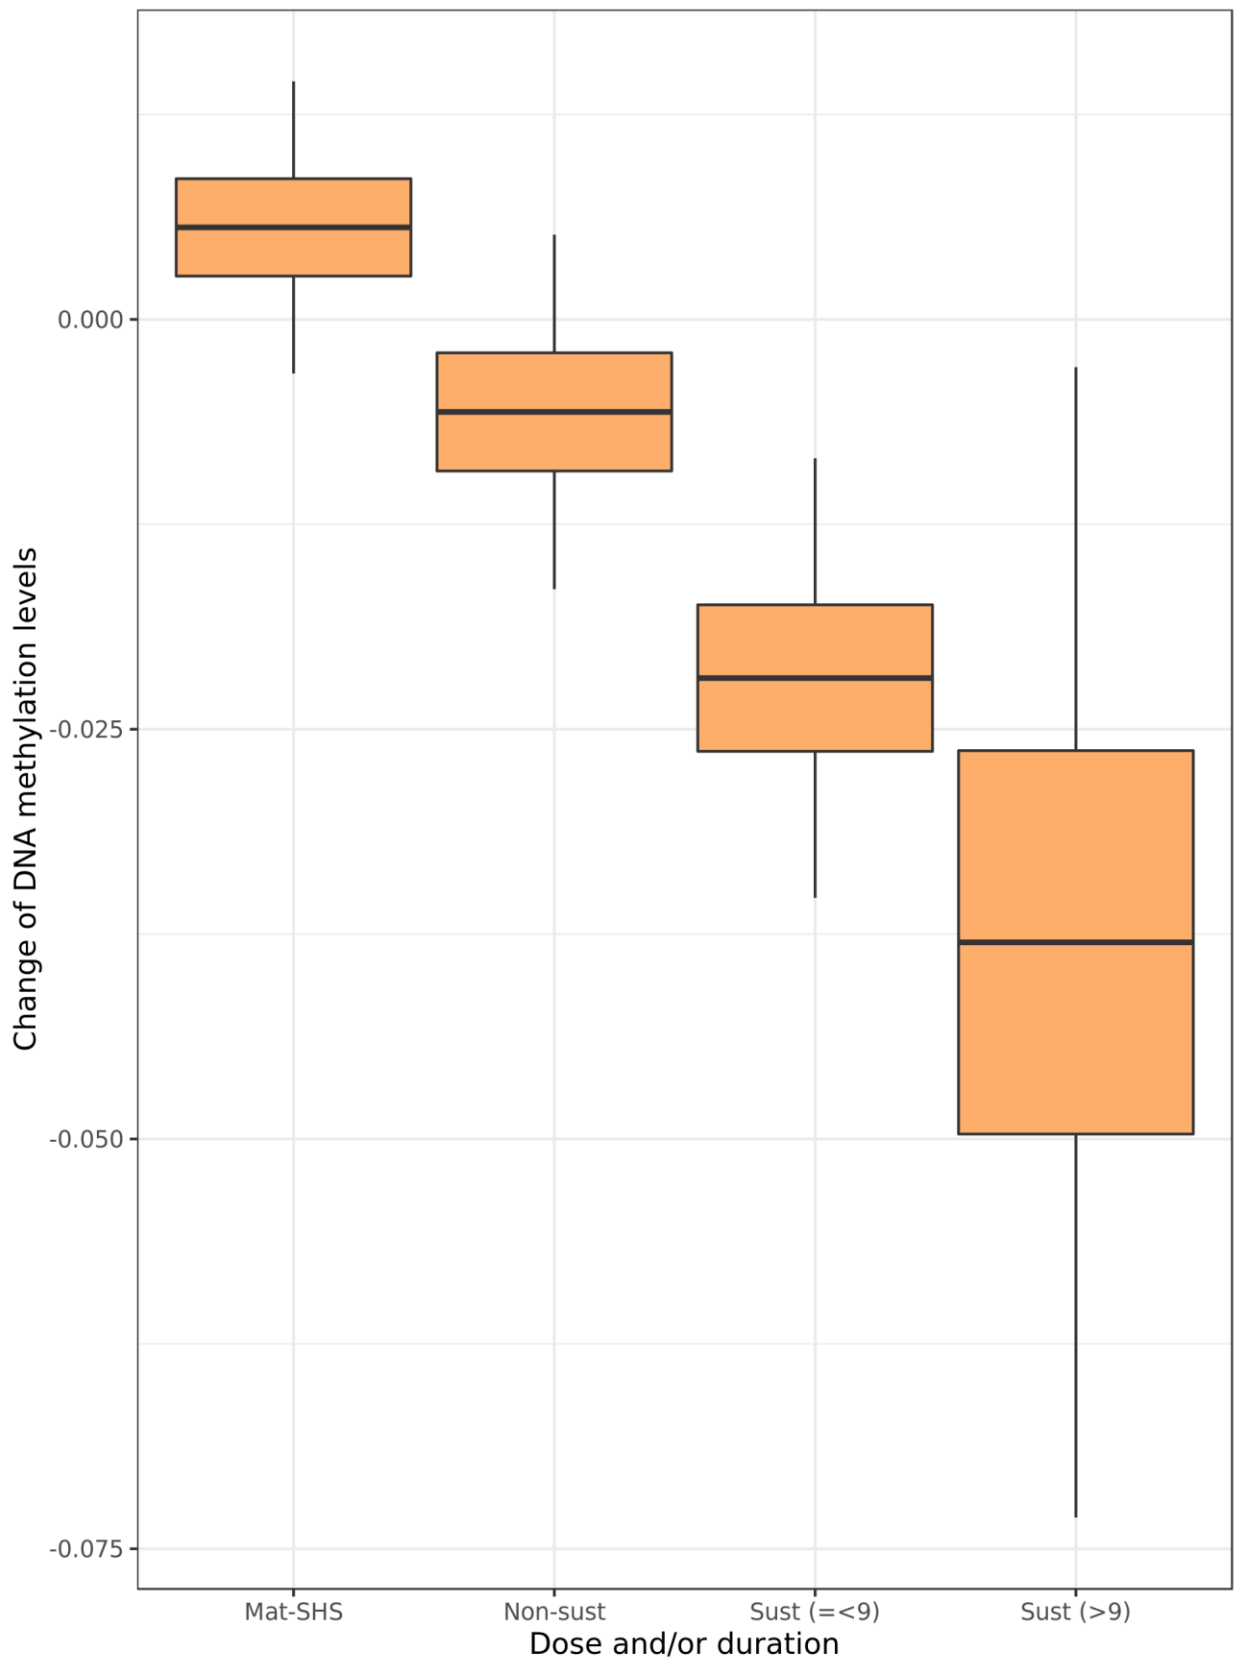

cg23067299

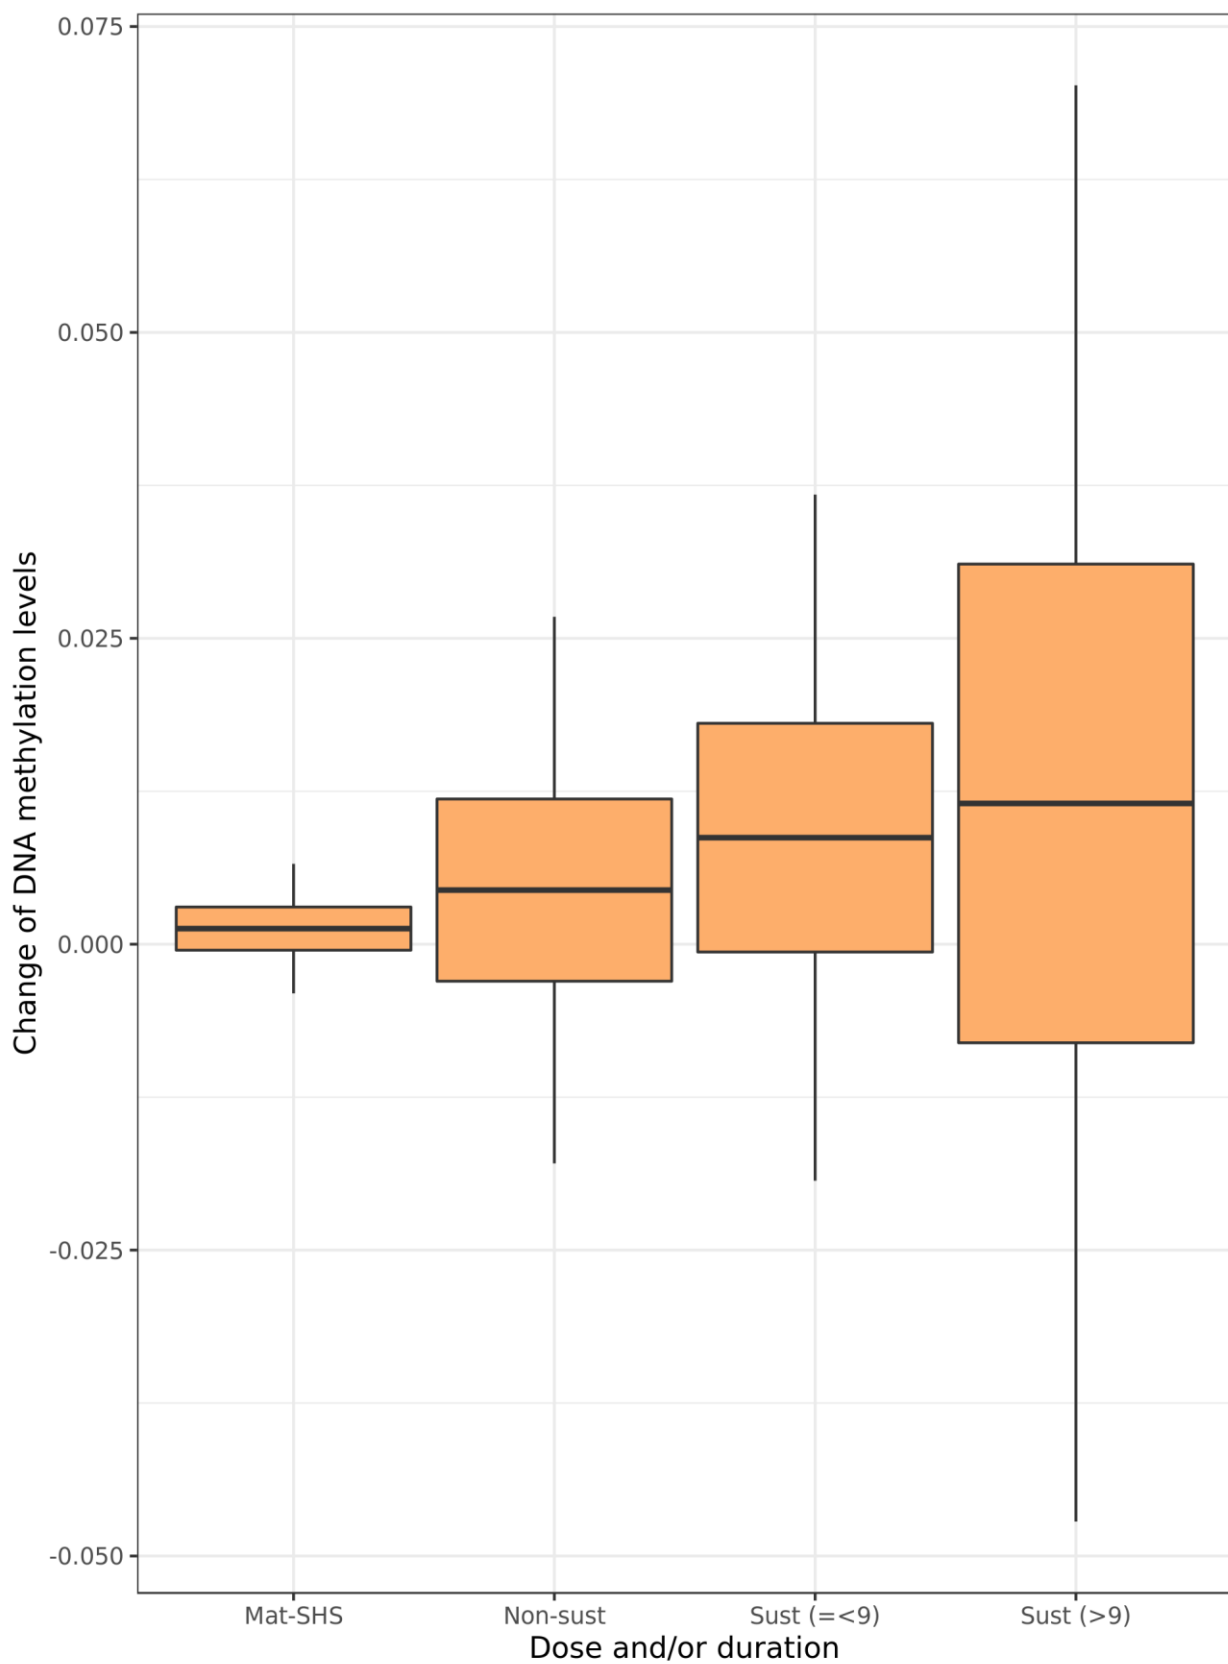

cg22549041

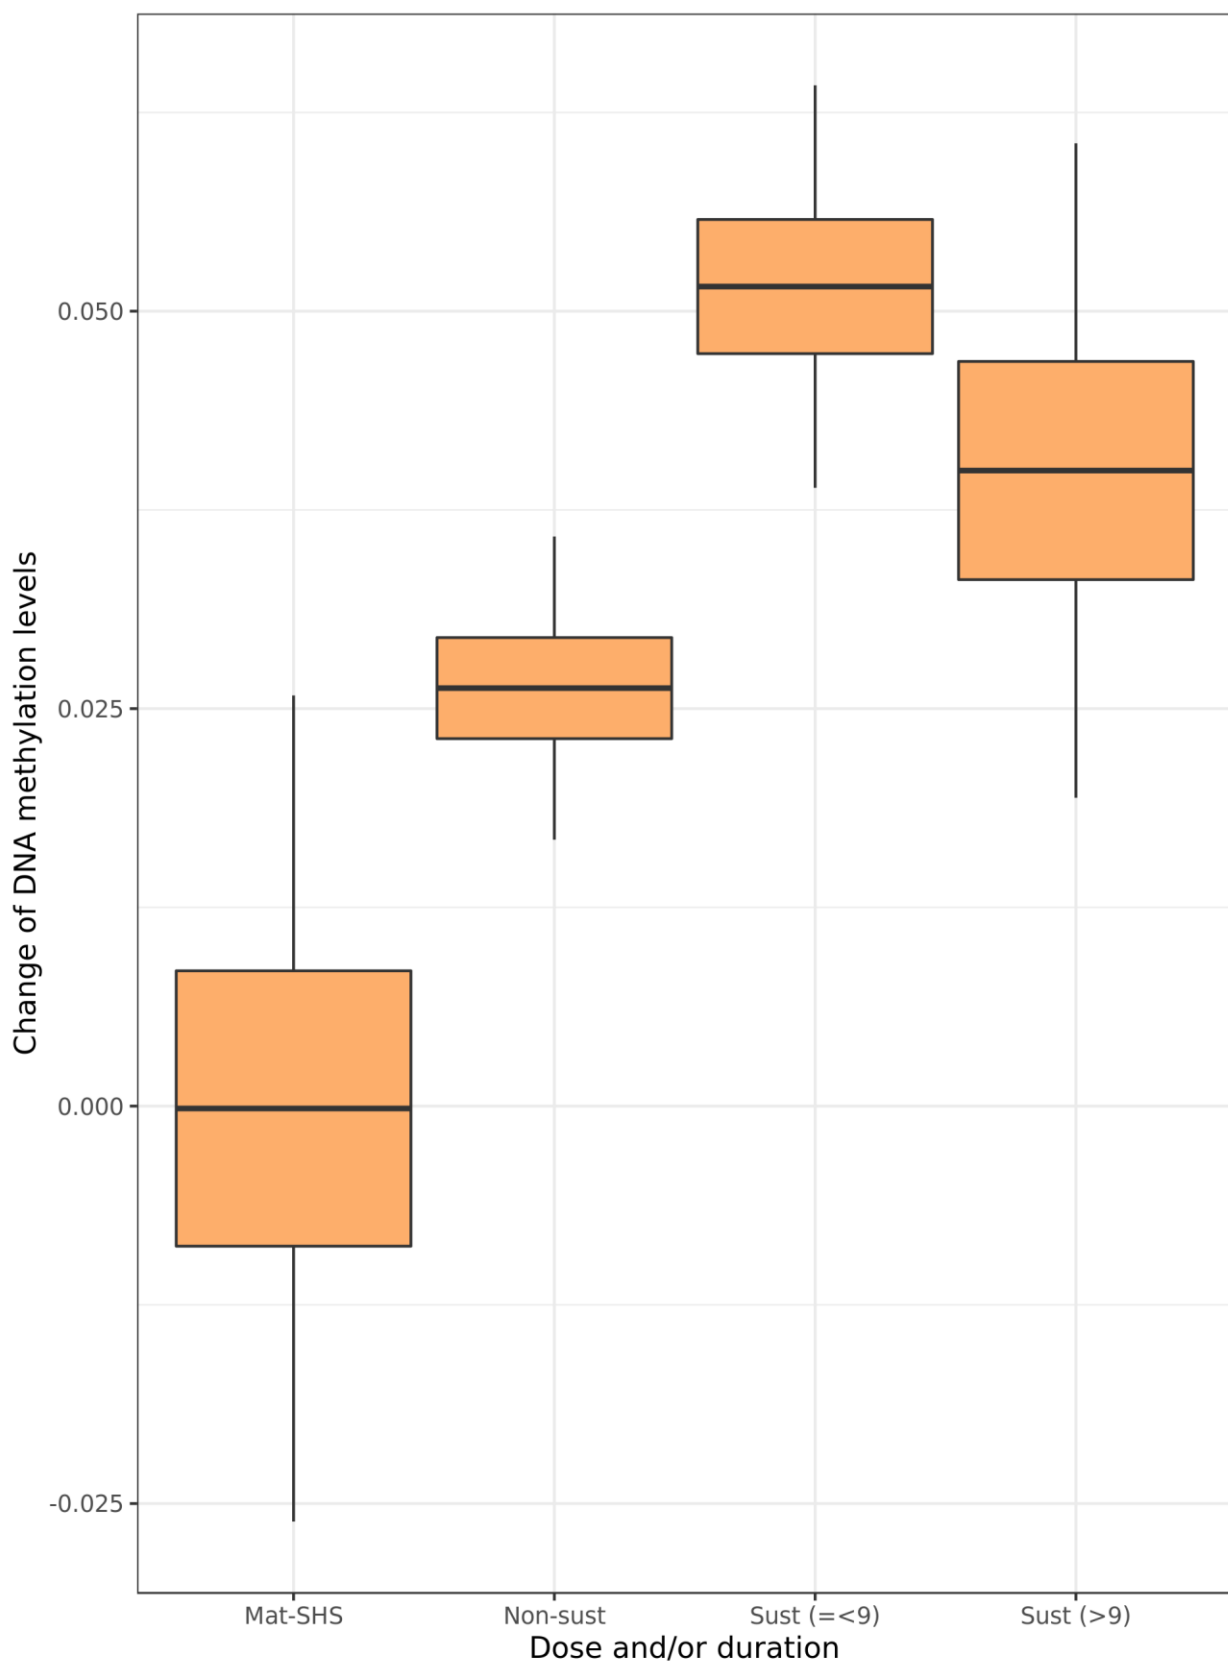

cg22132788

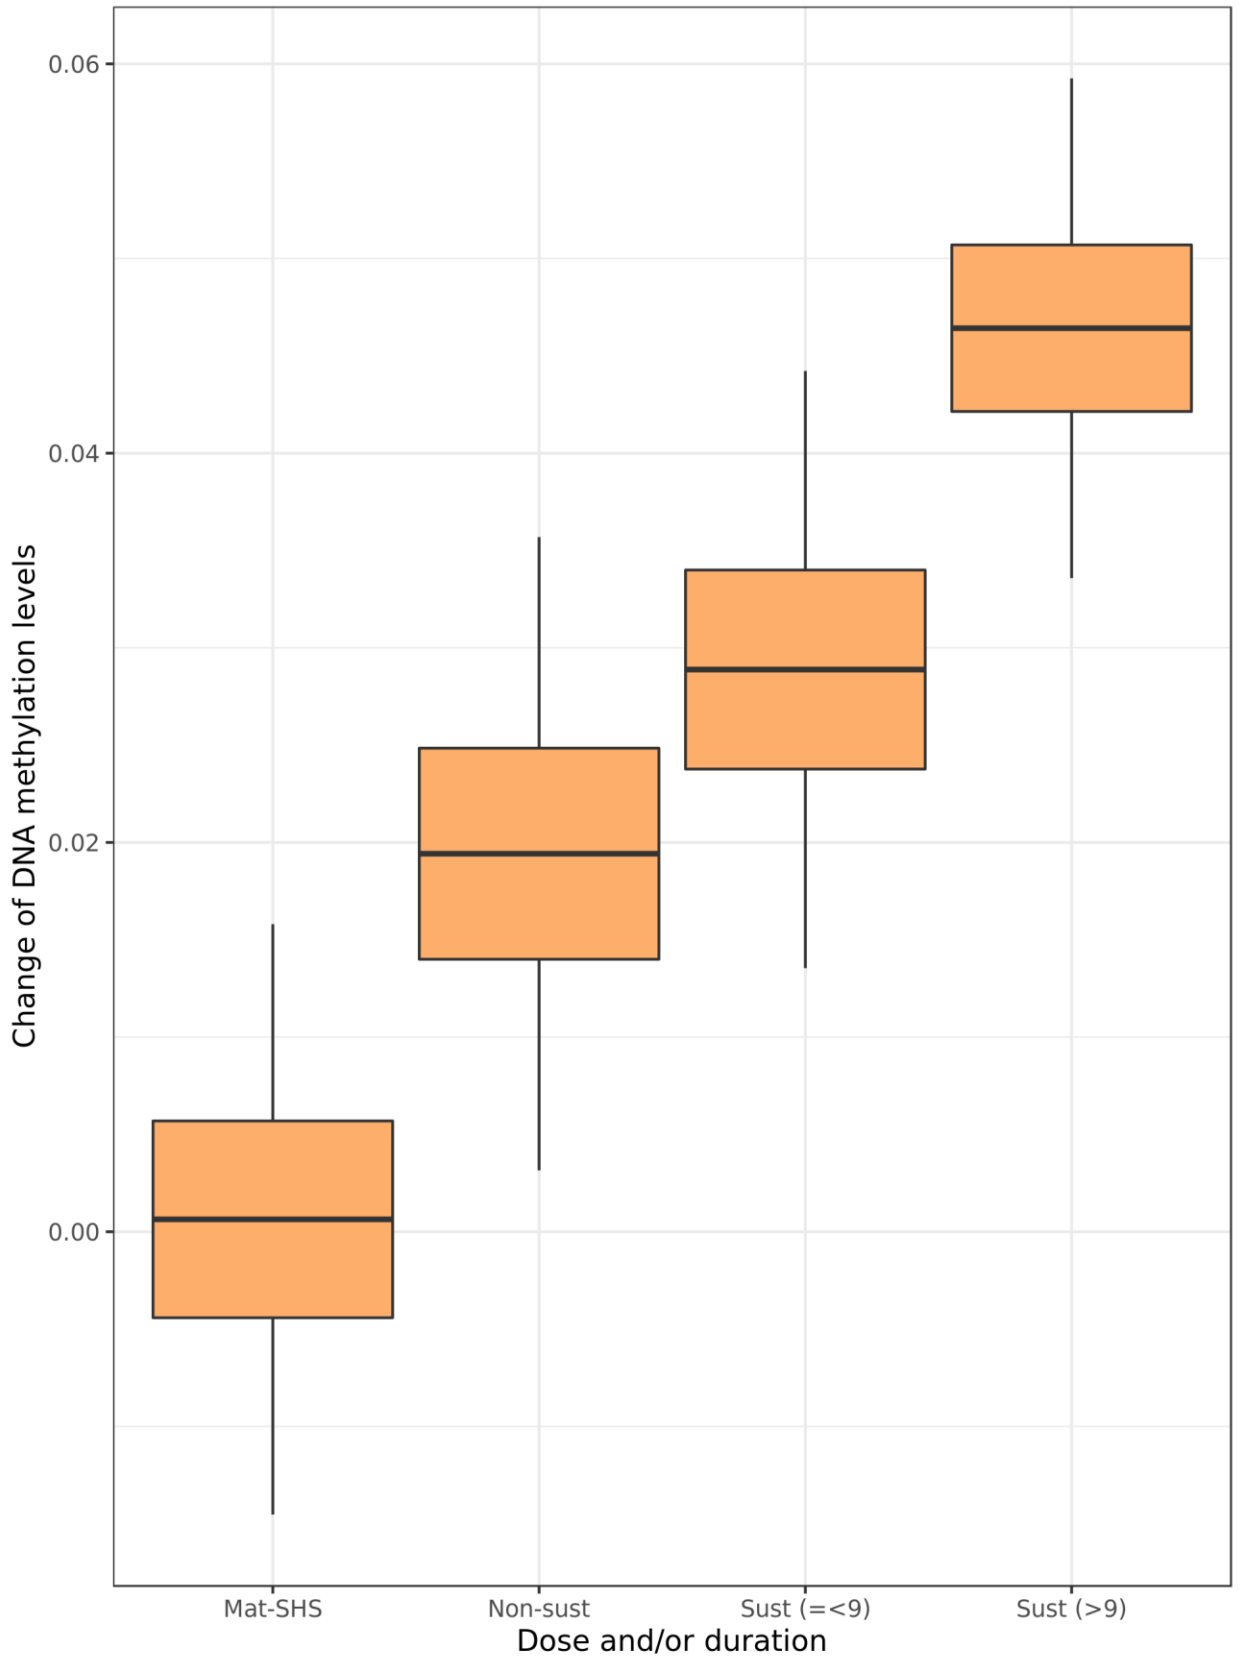

cg21161138

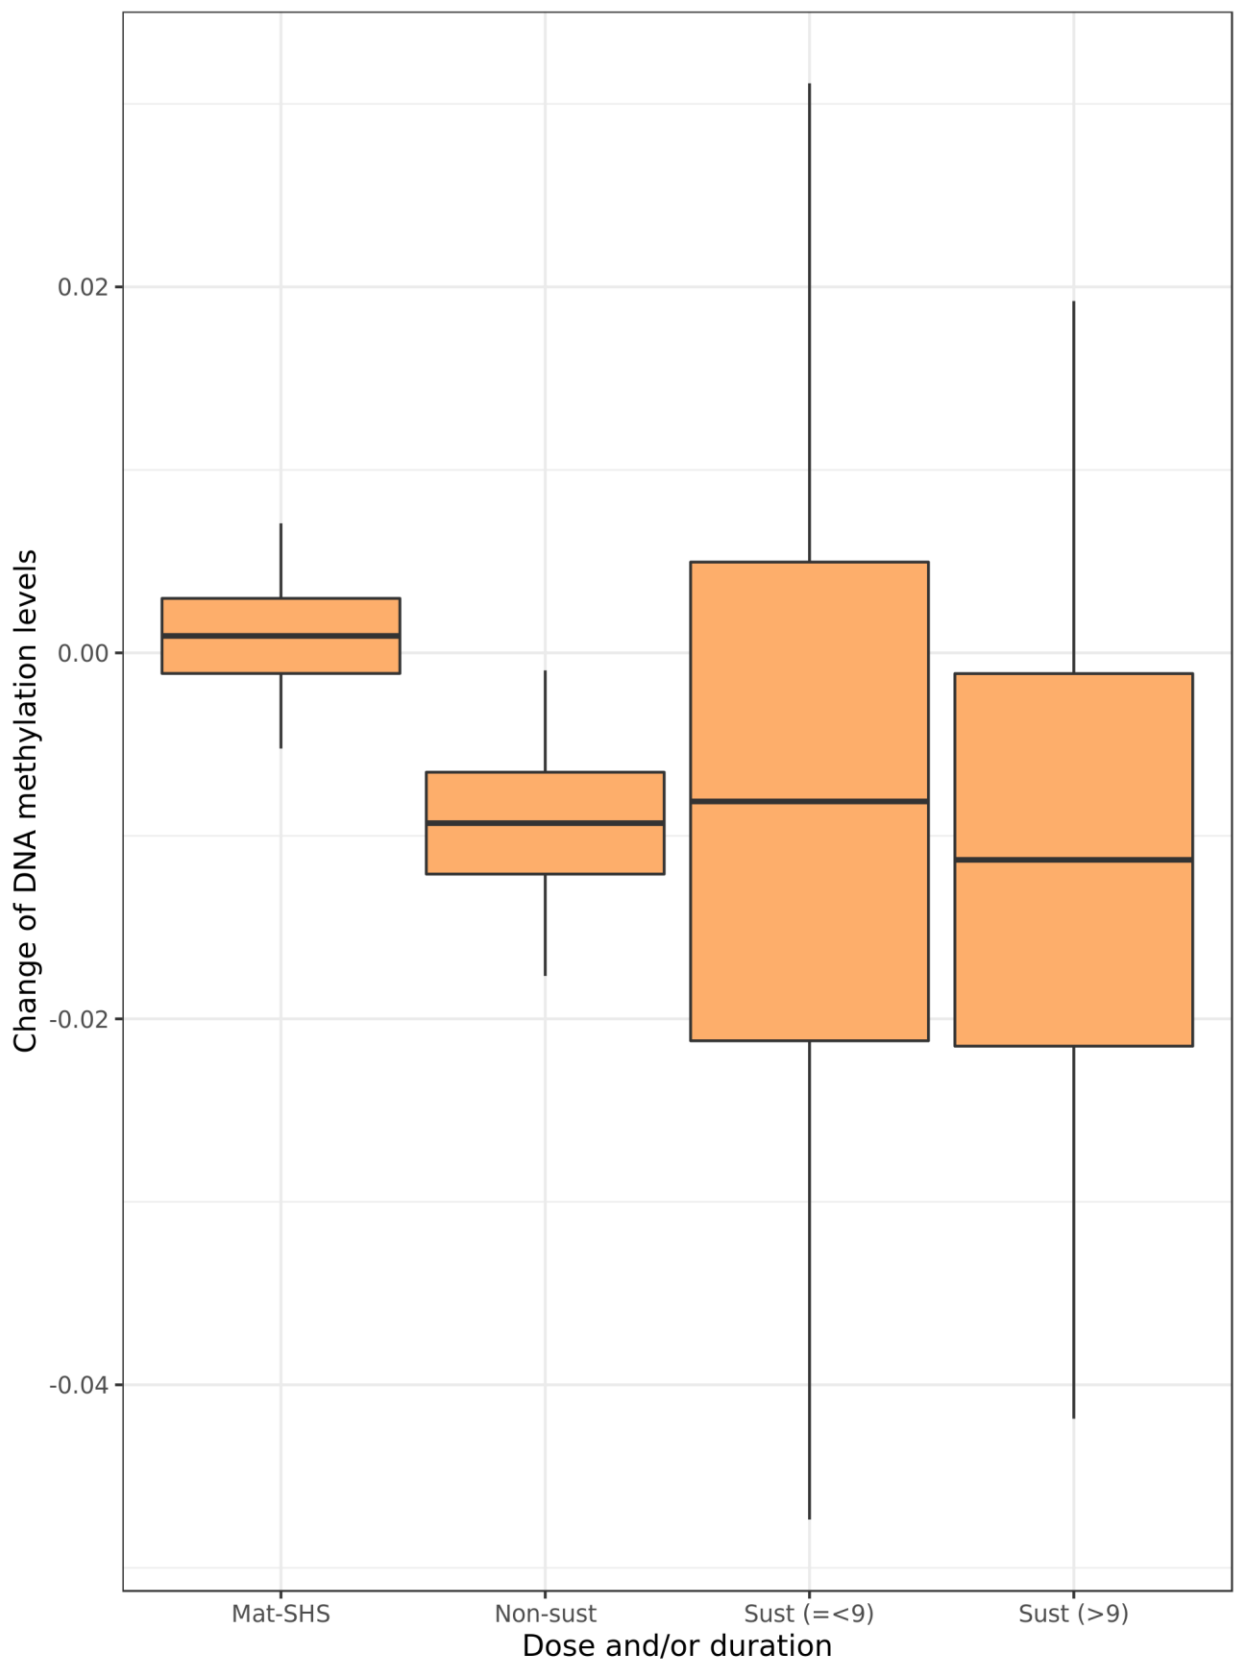

cg20344448

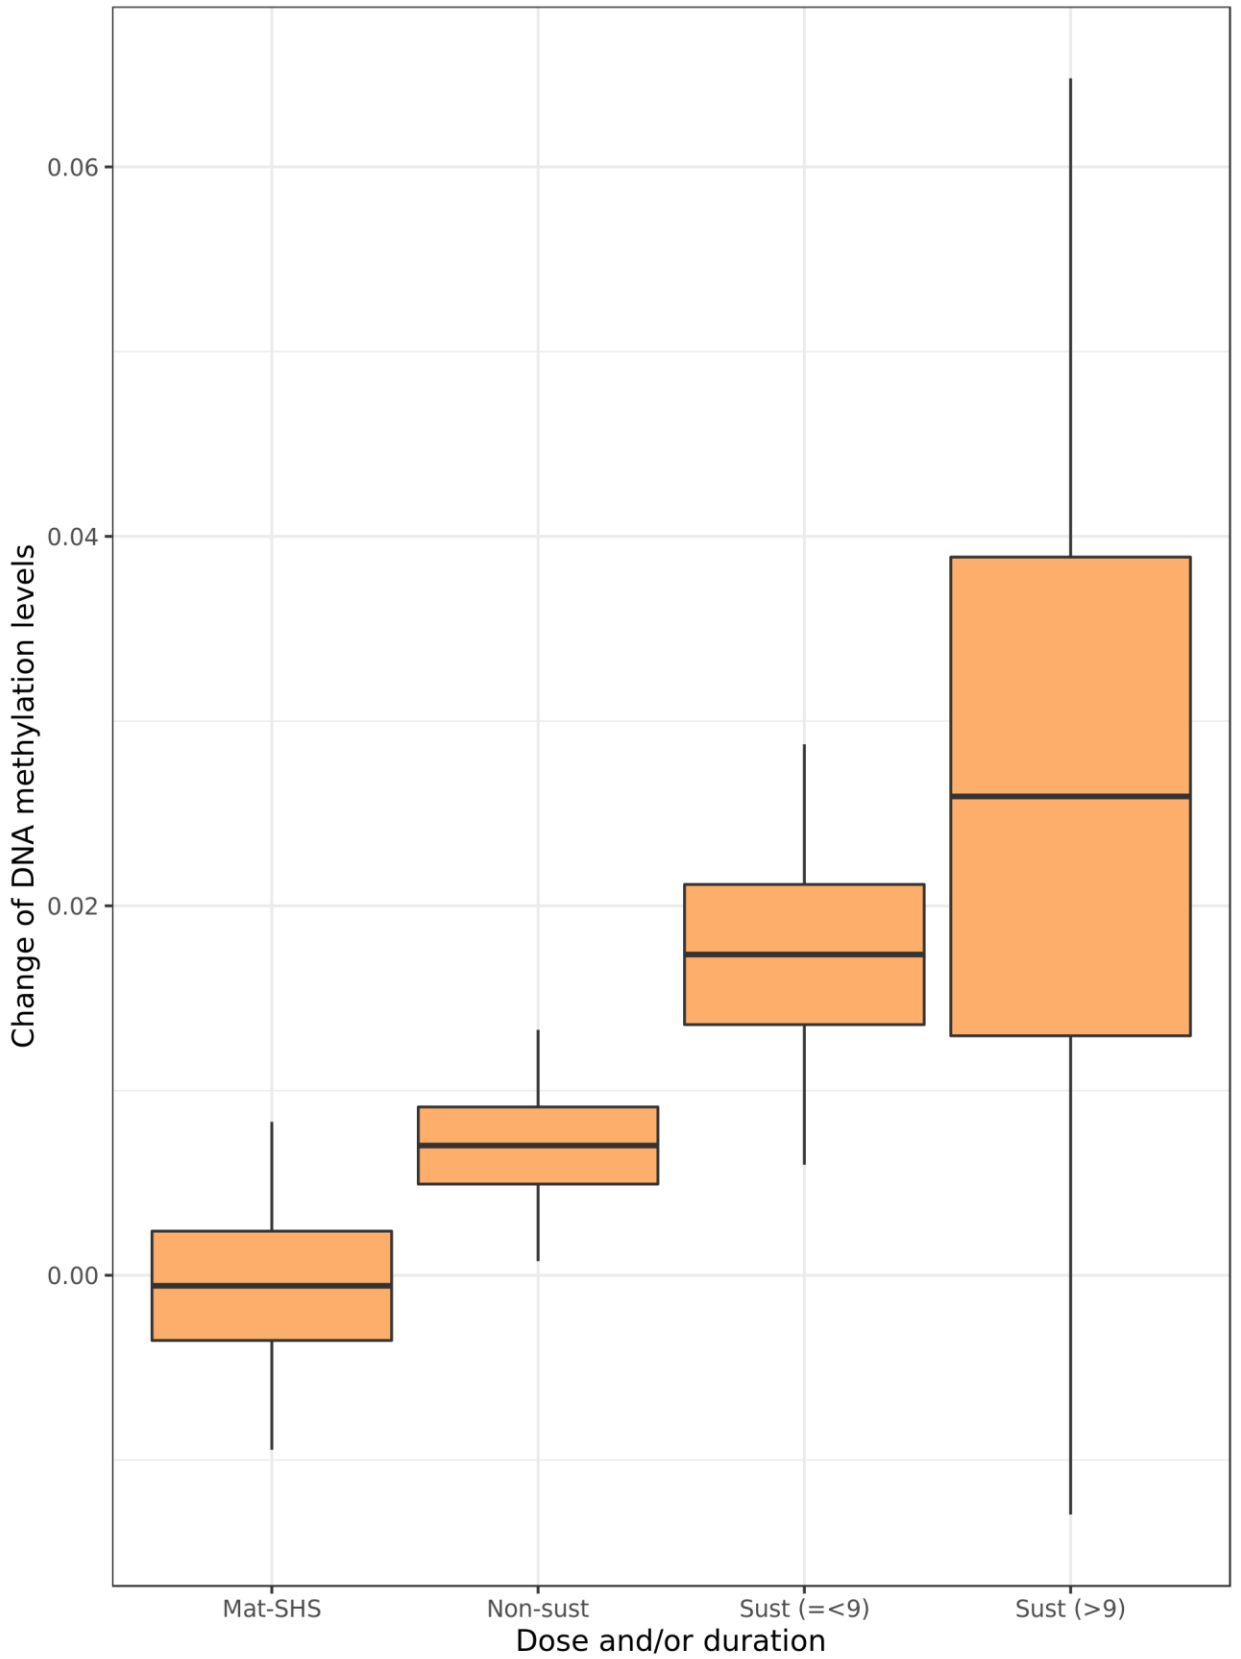

cg19089201

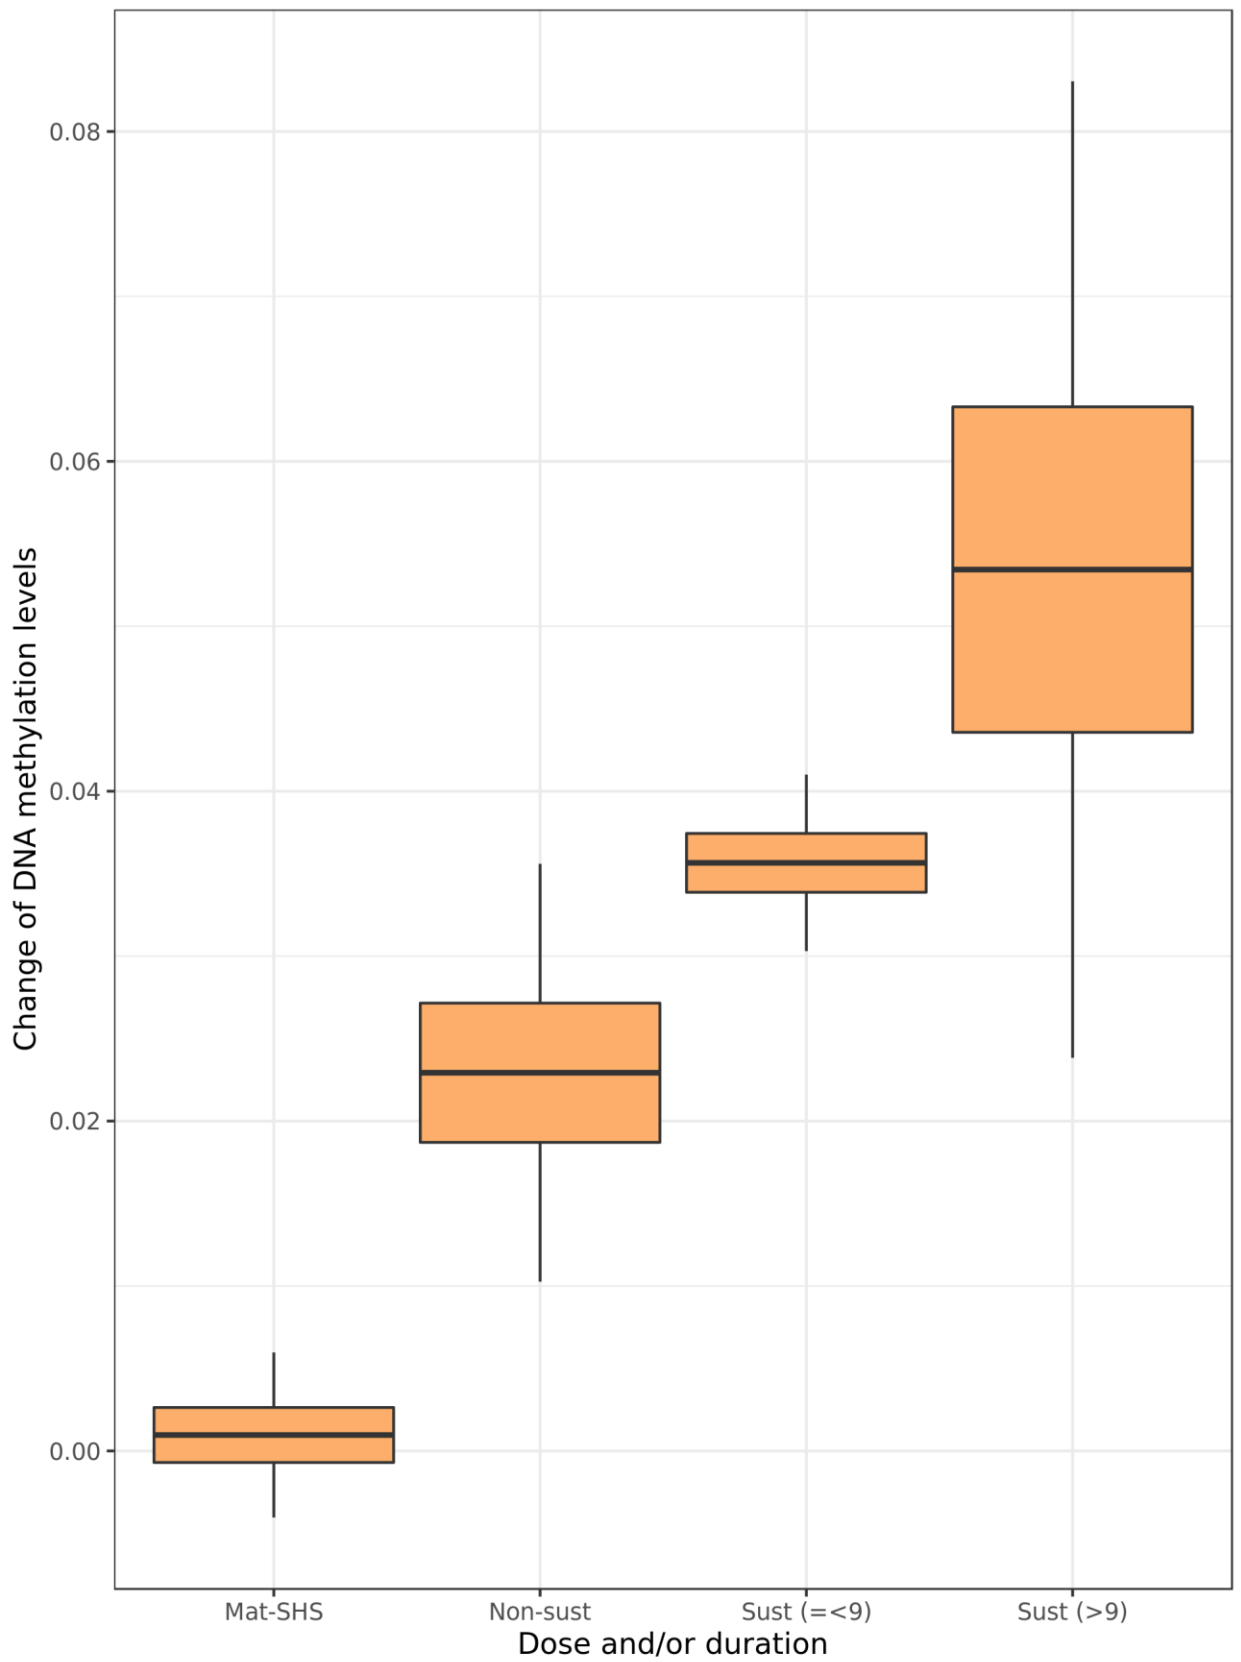



cg18703066

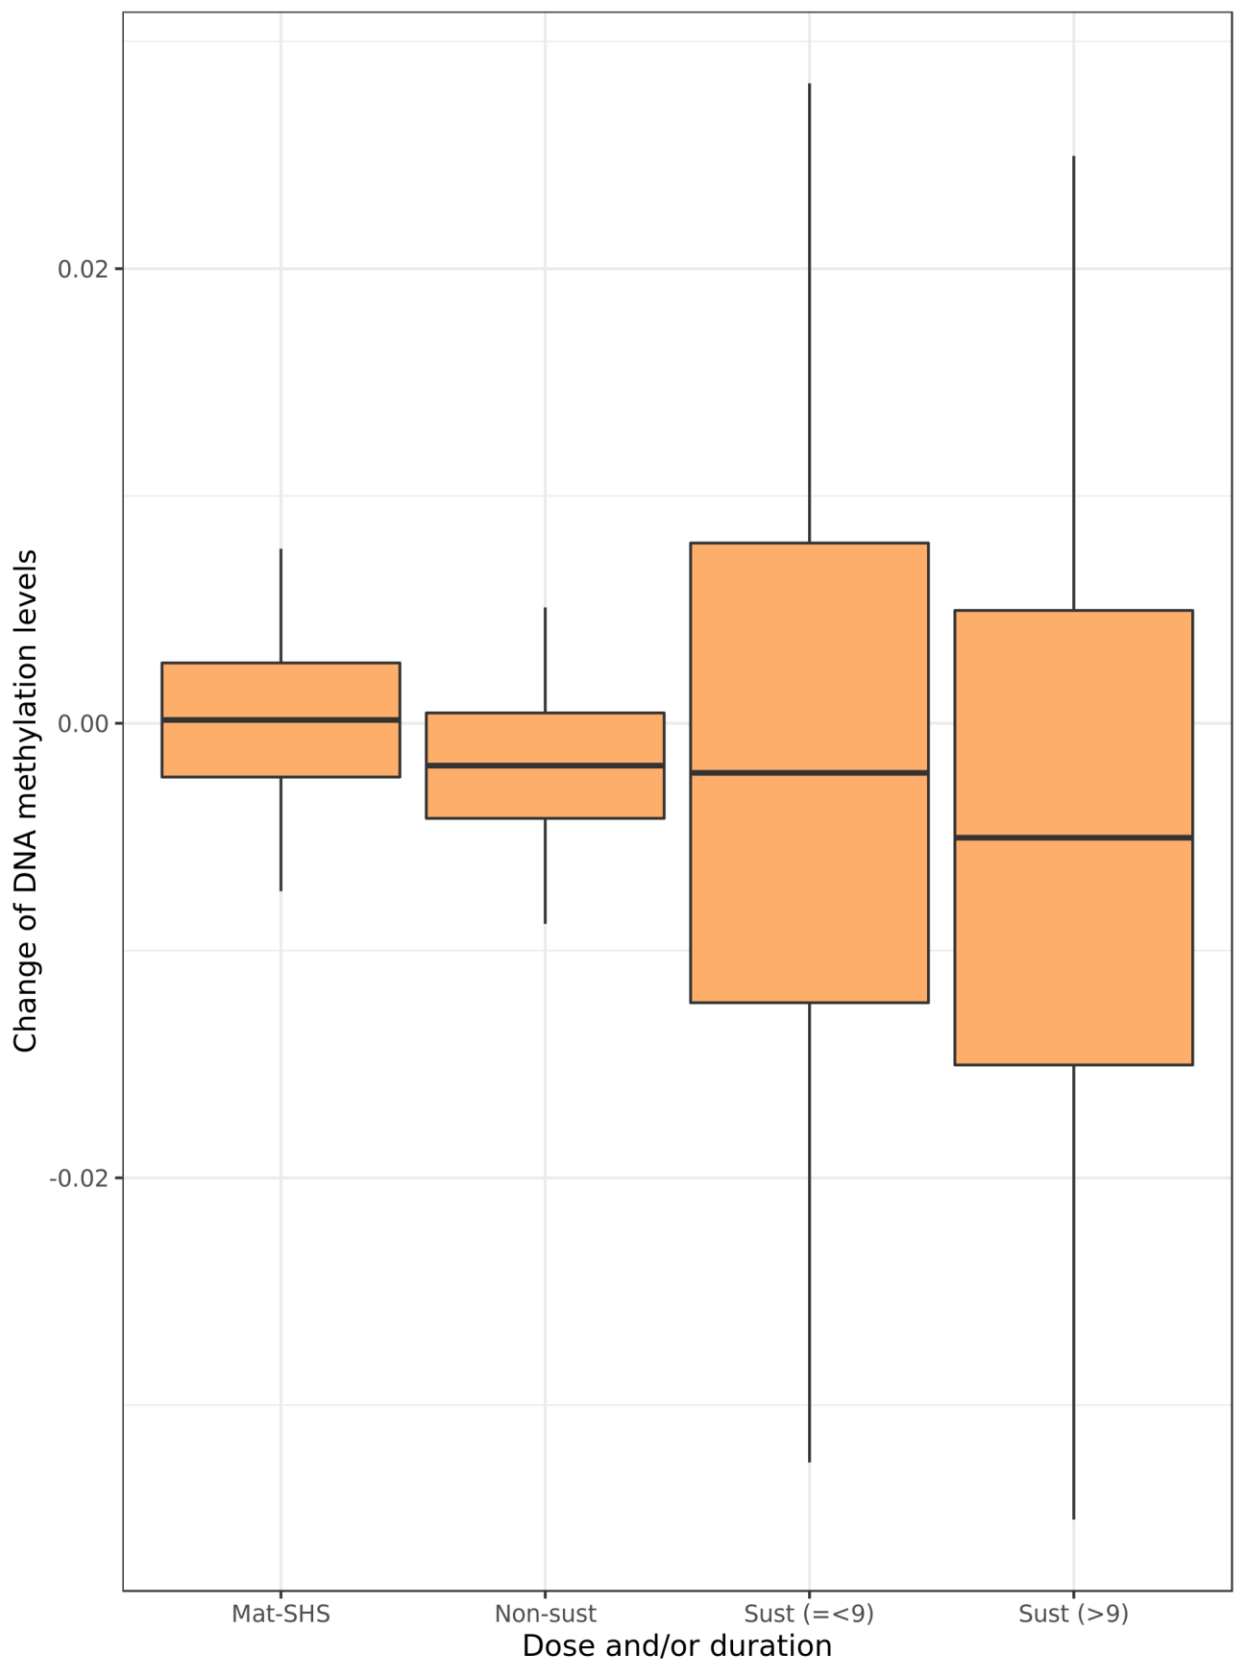

cg18540492

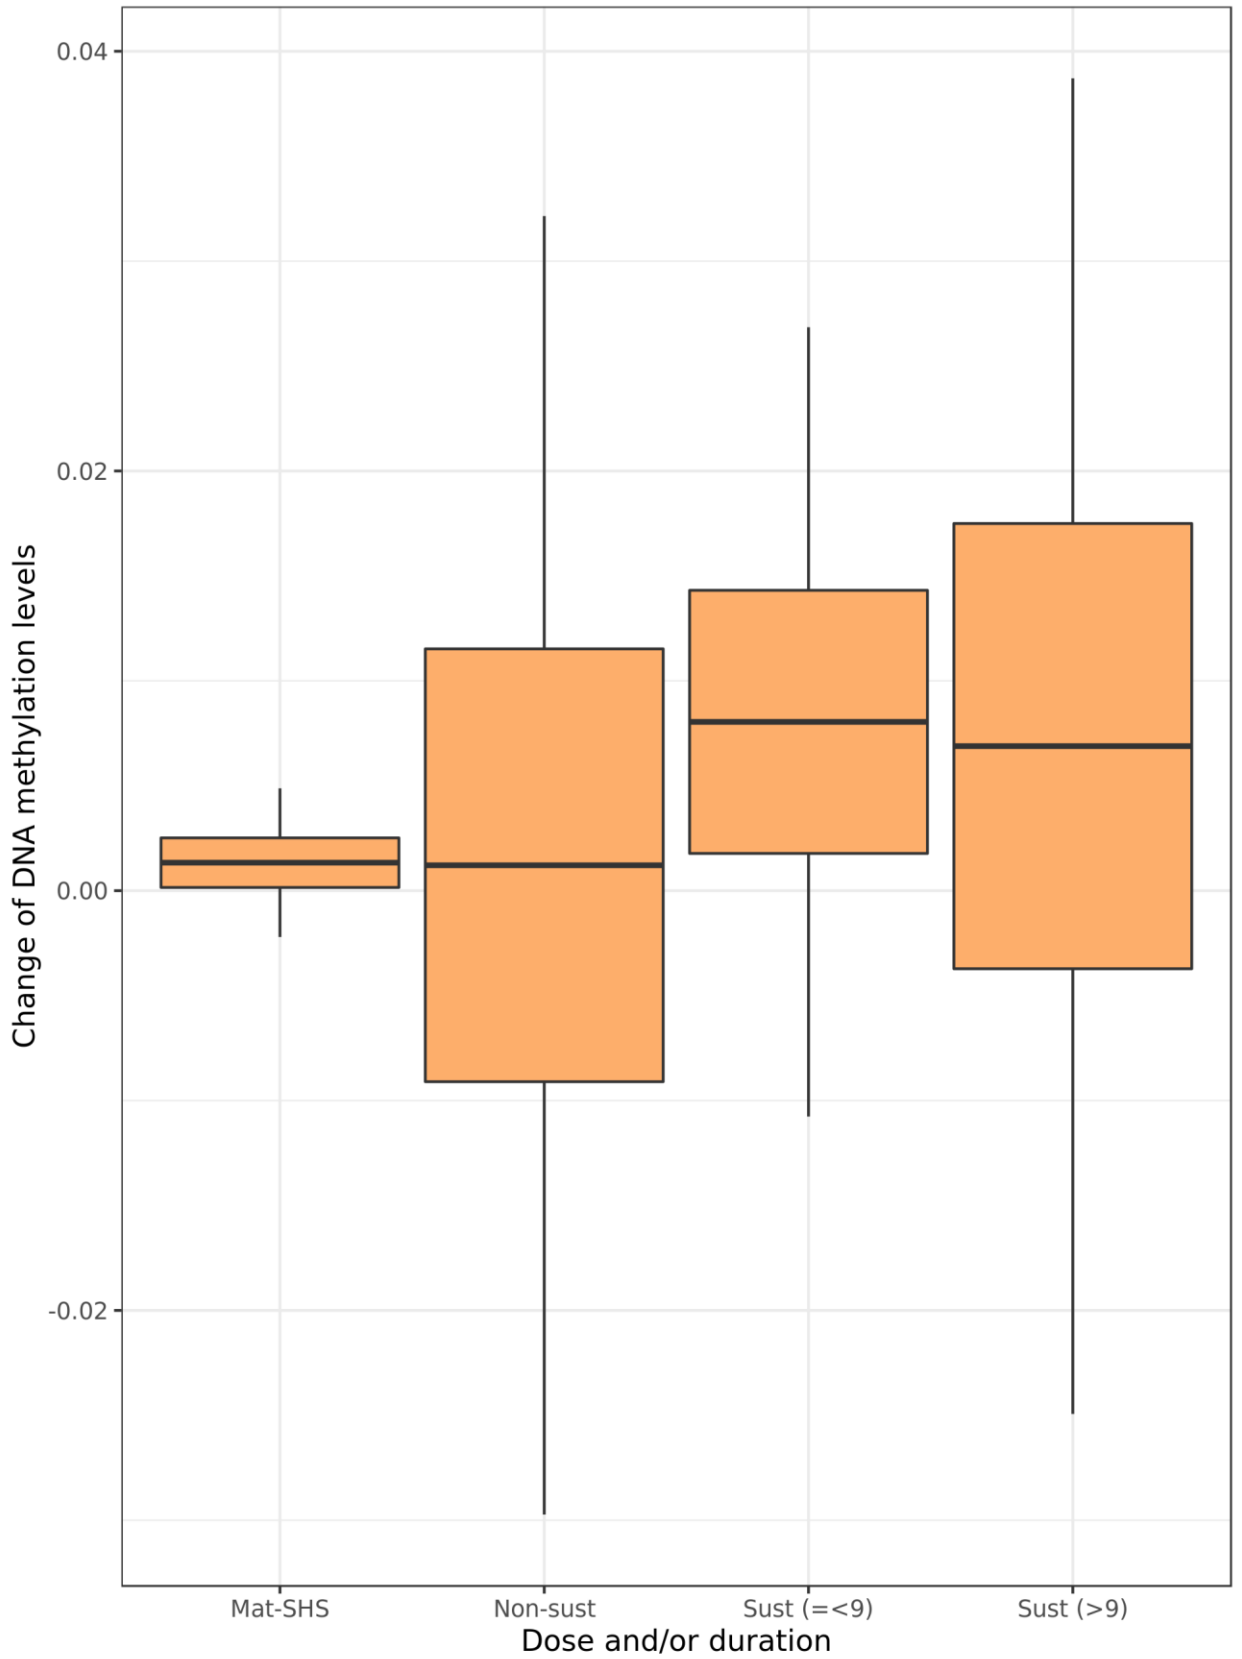

cg18092474

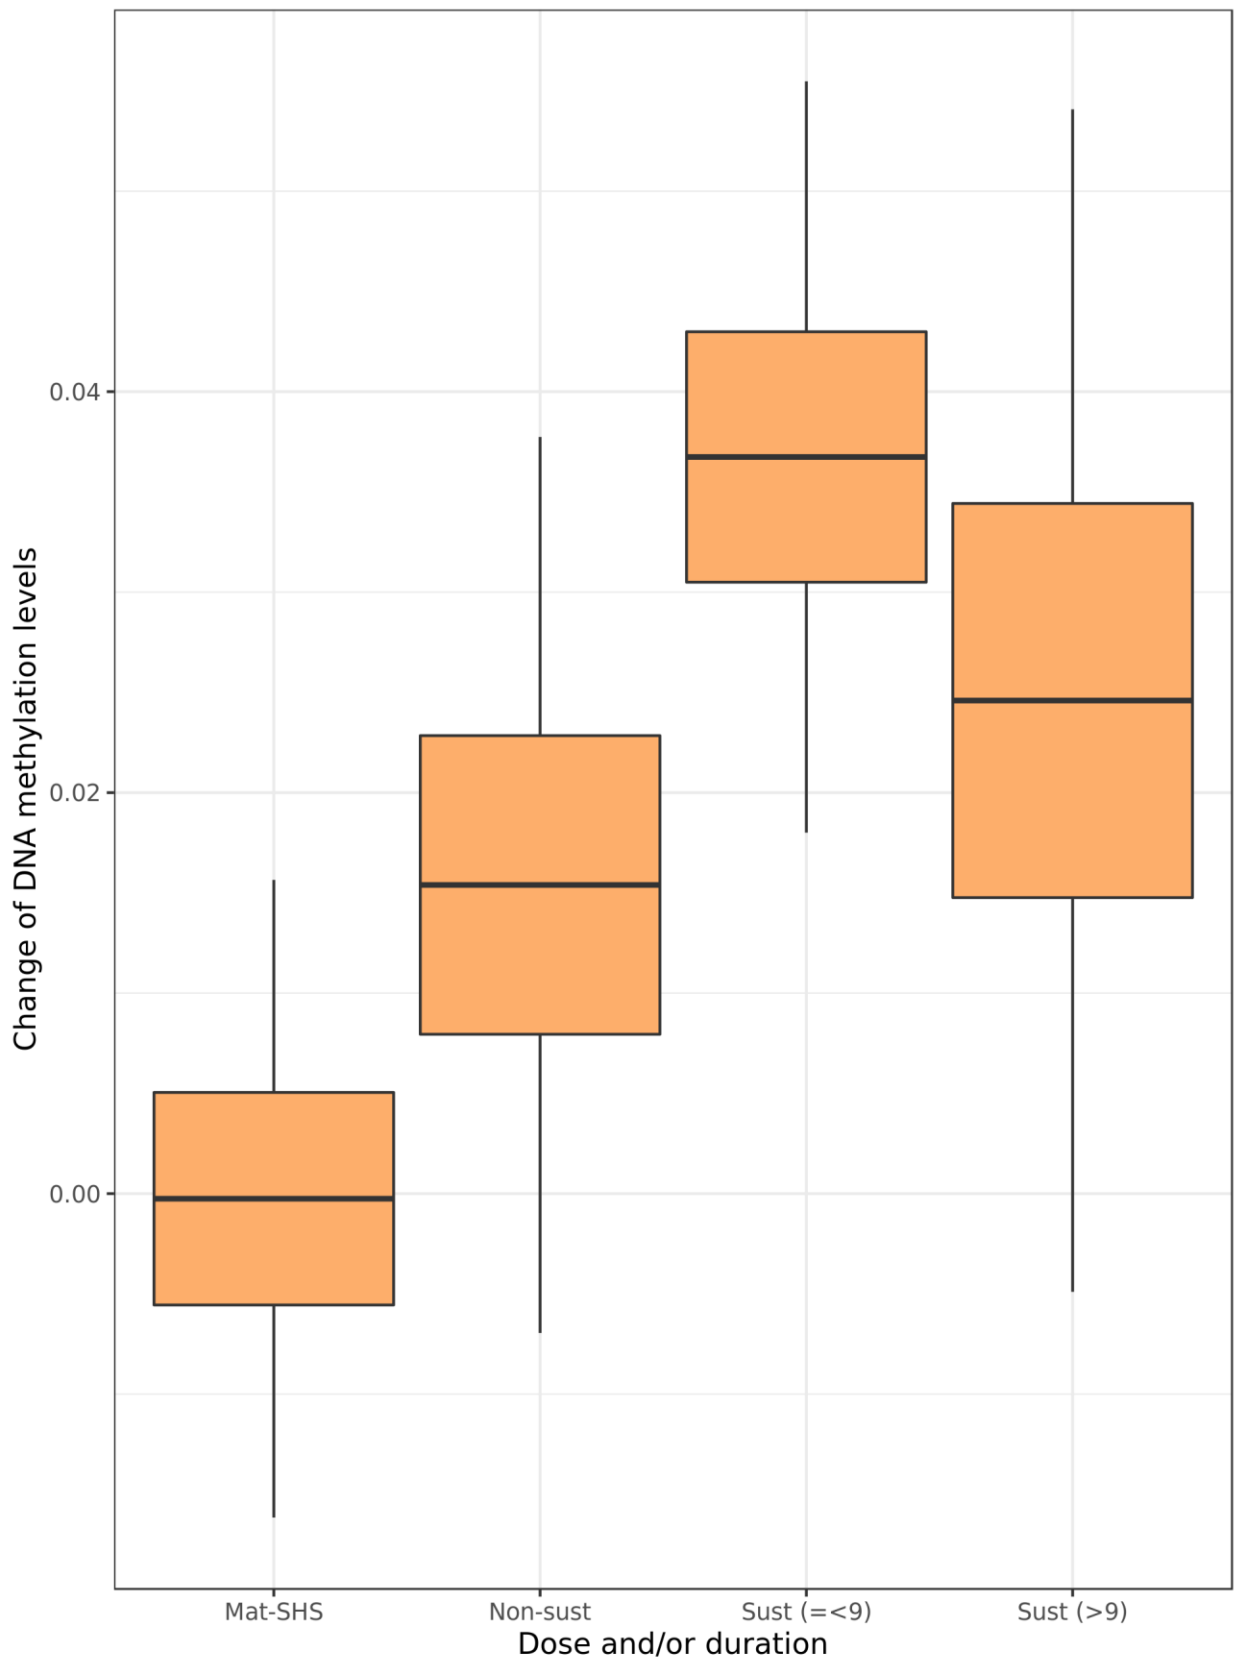

cg17924476

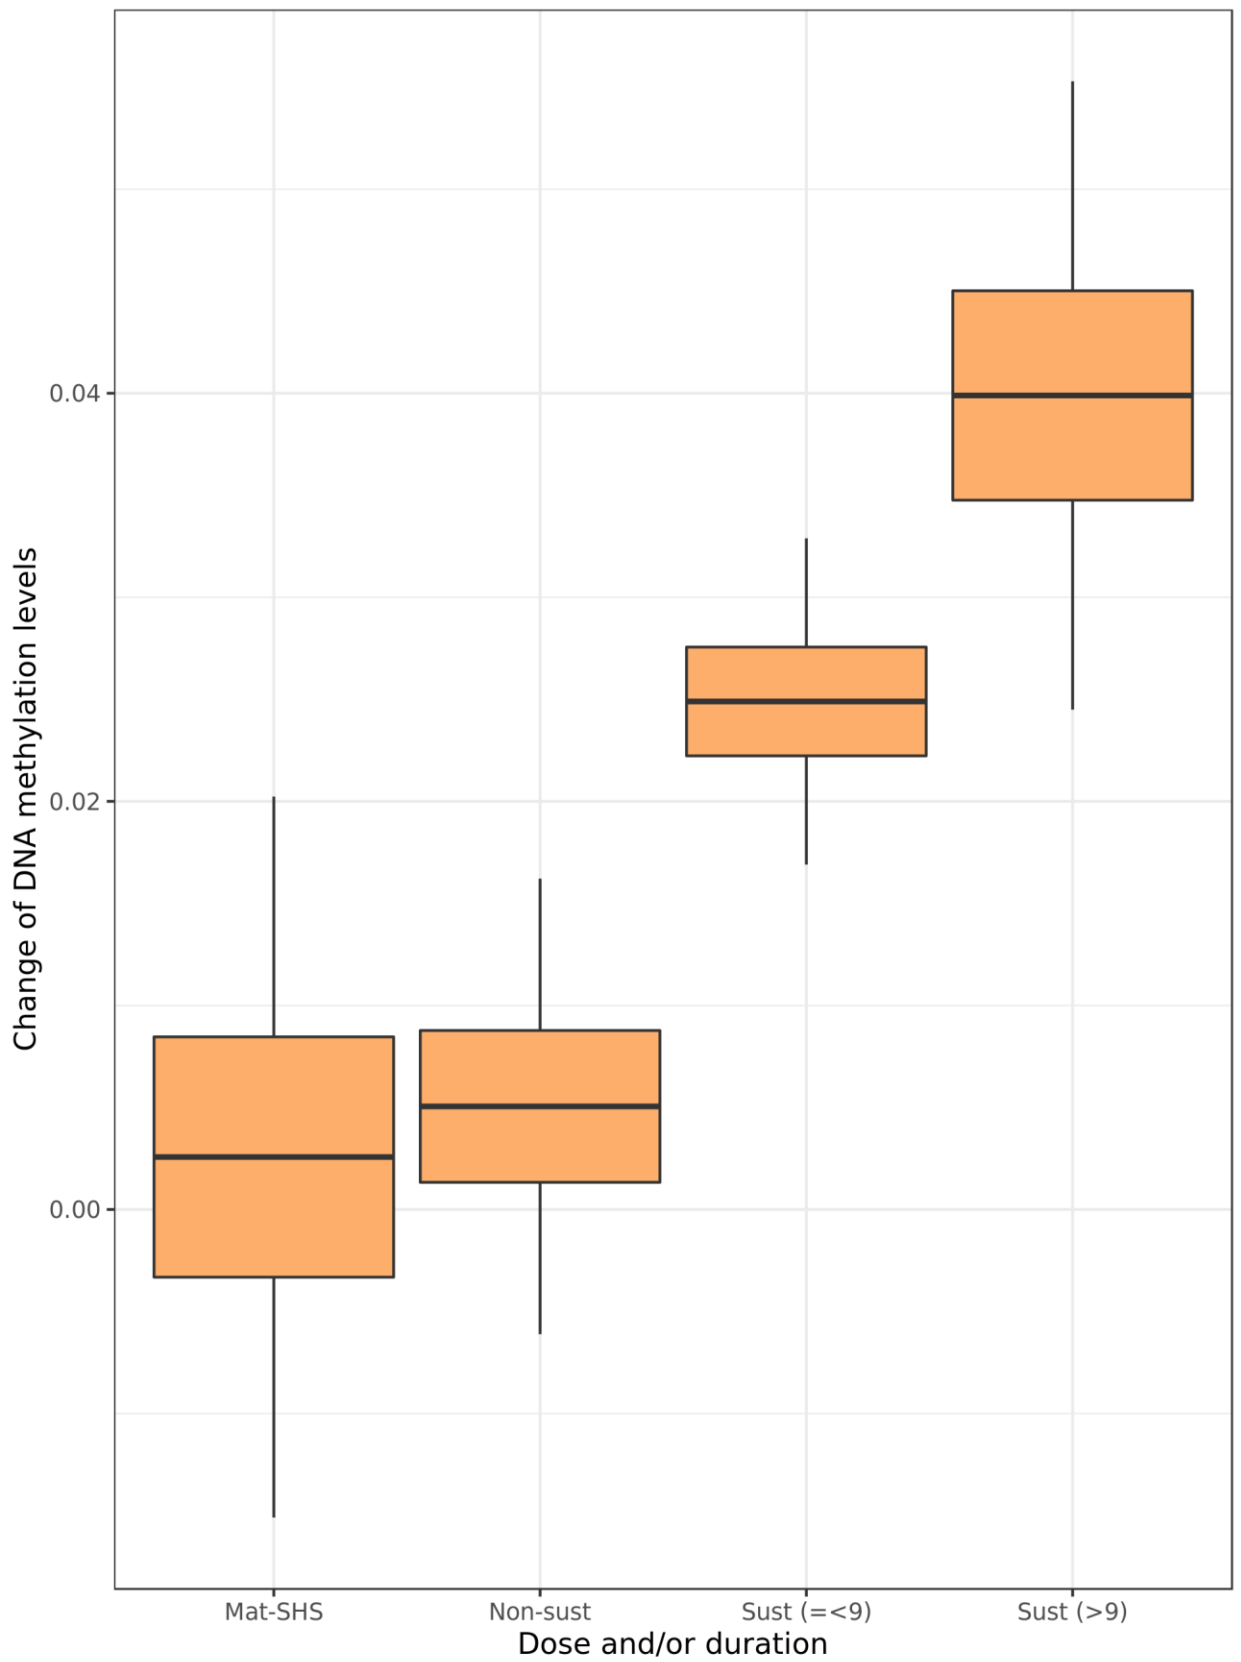

cg17852385

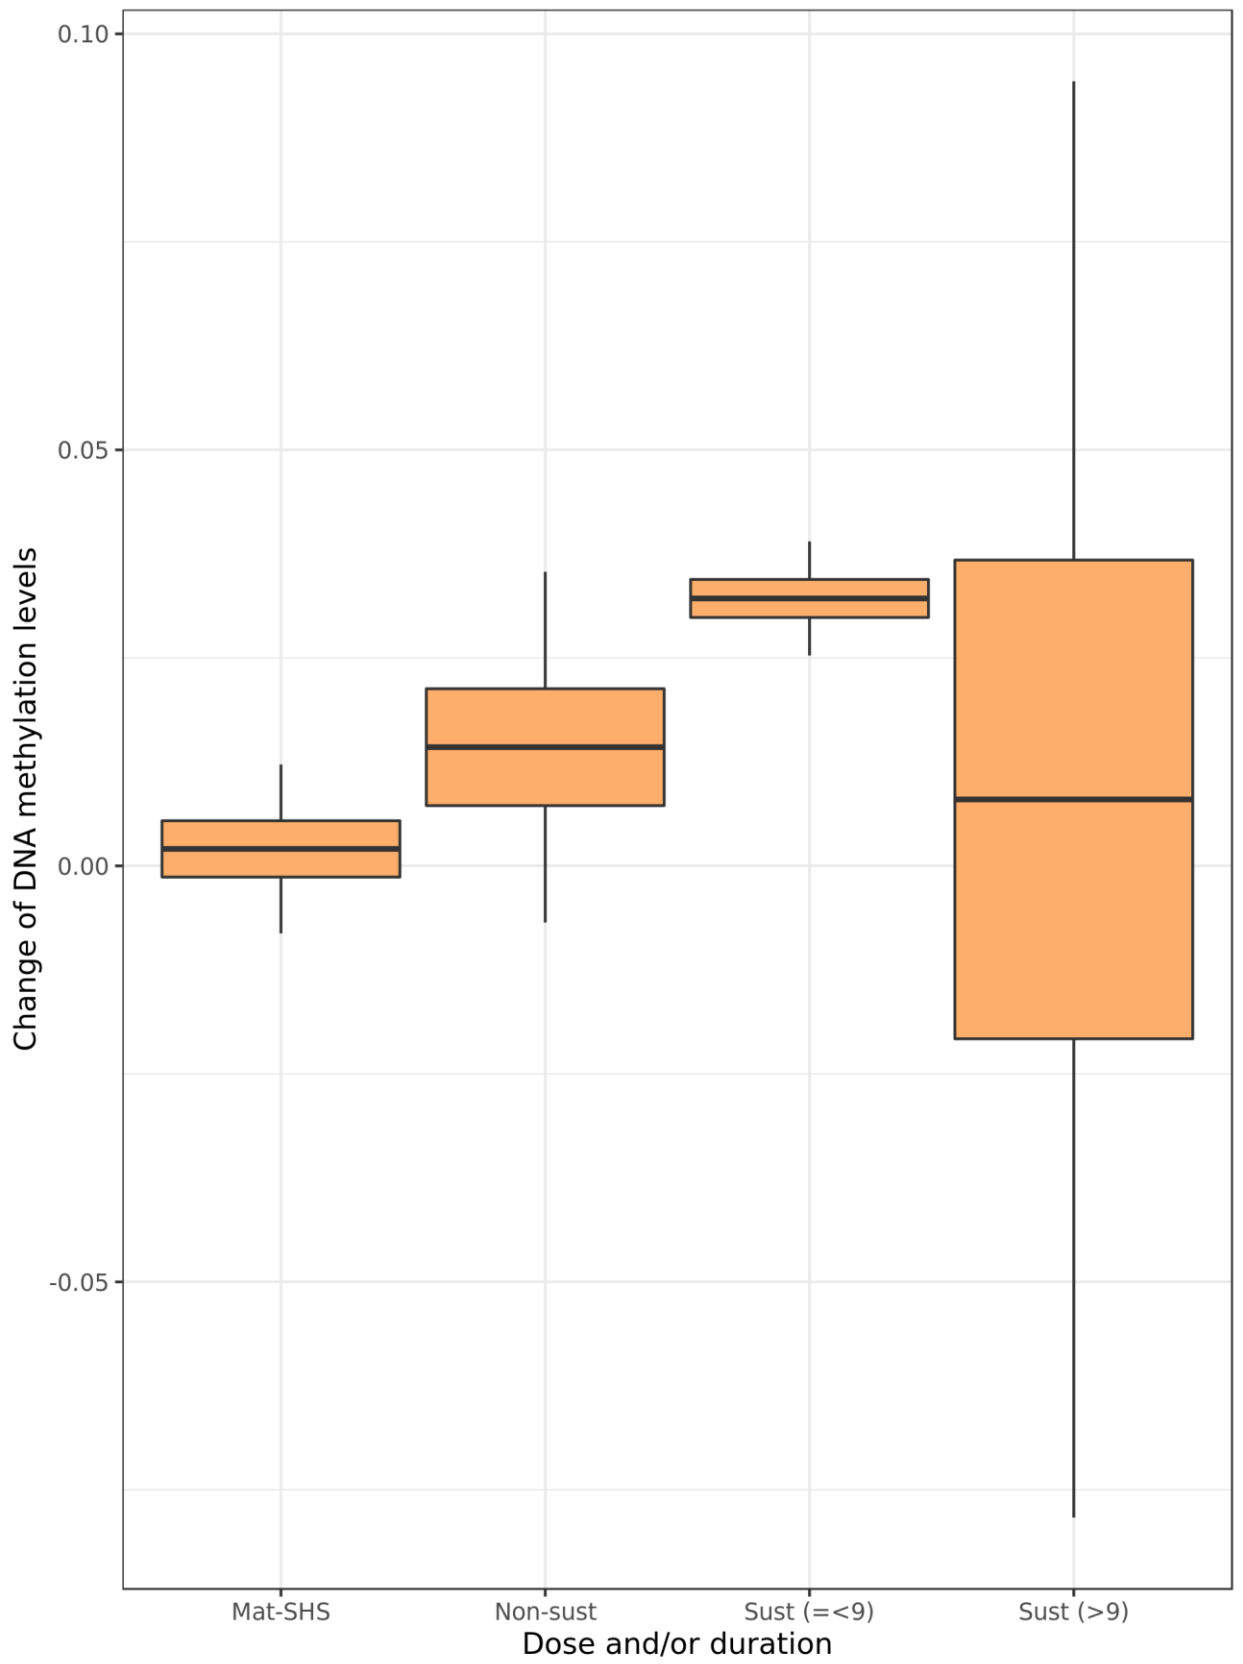

cg17454592

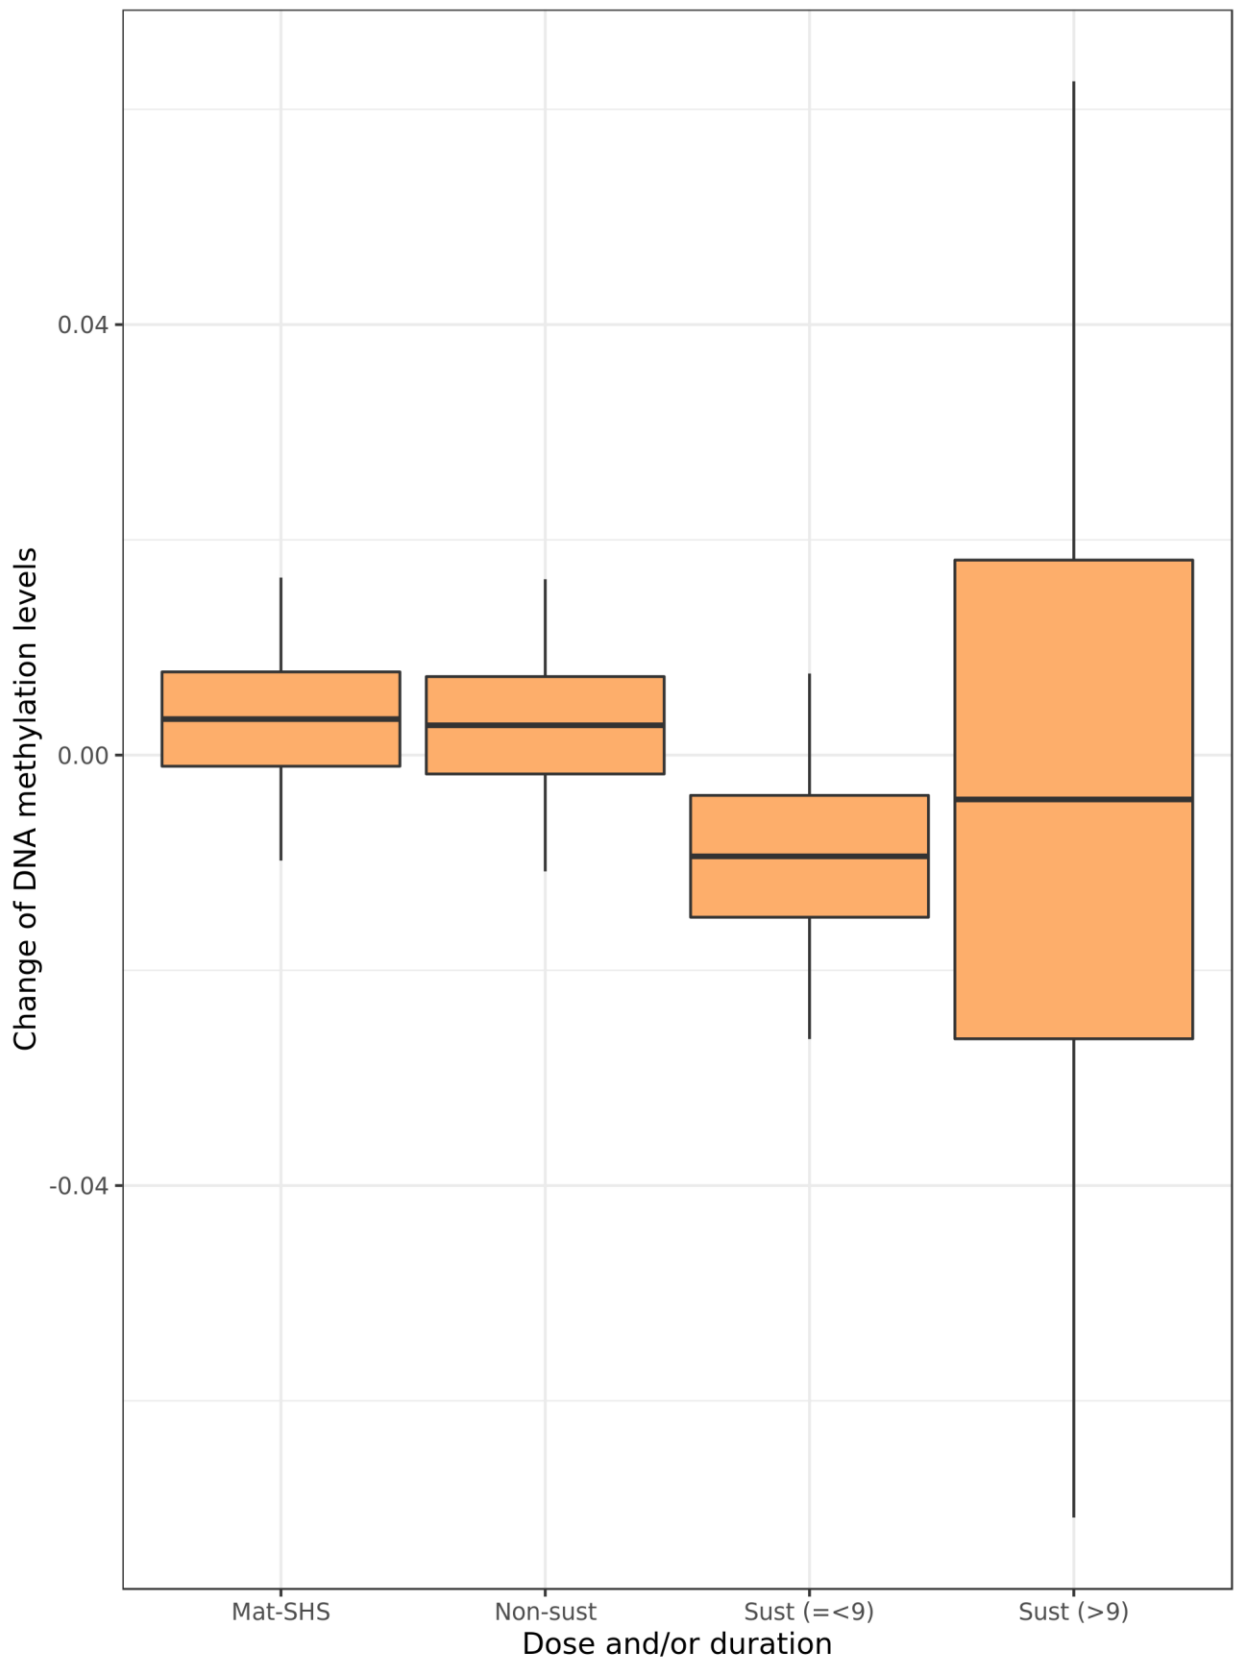

cg17199018

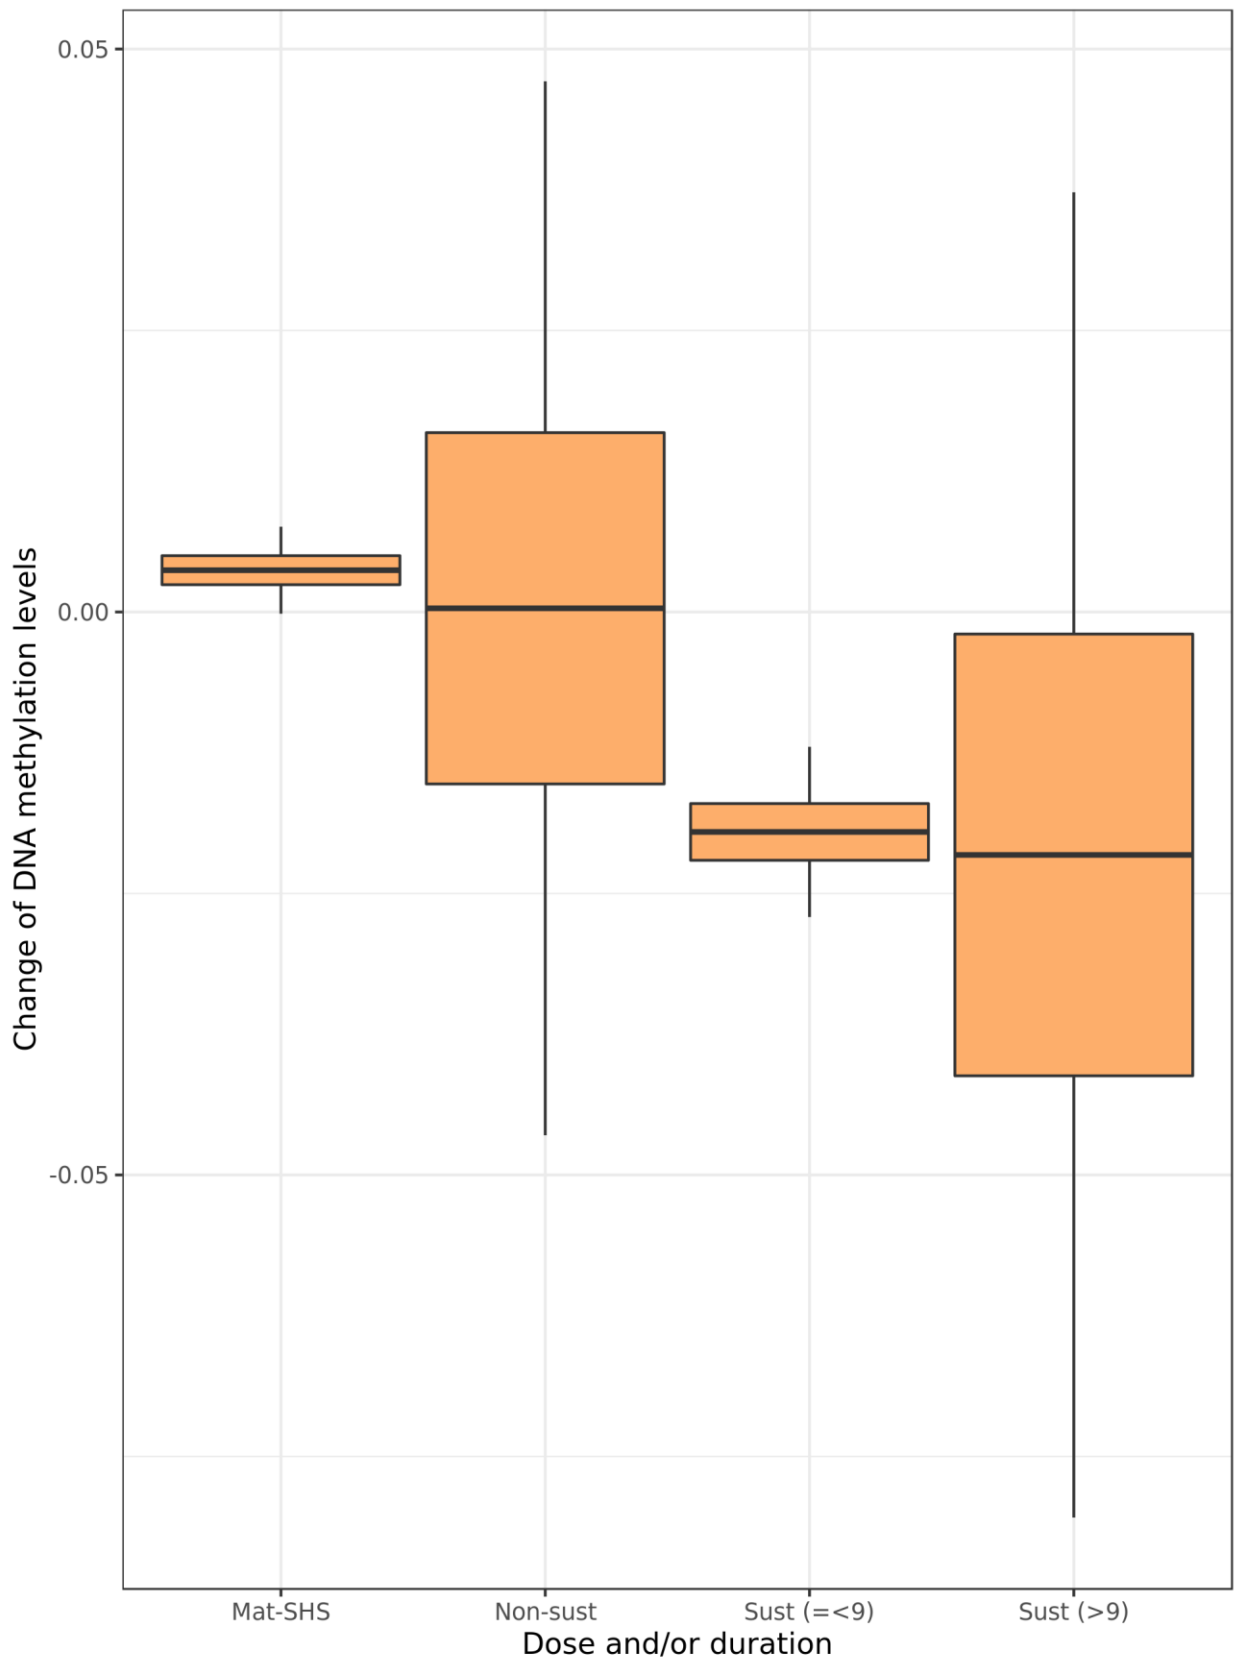

cg15507334

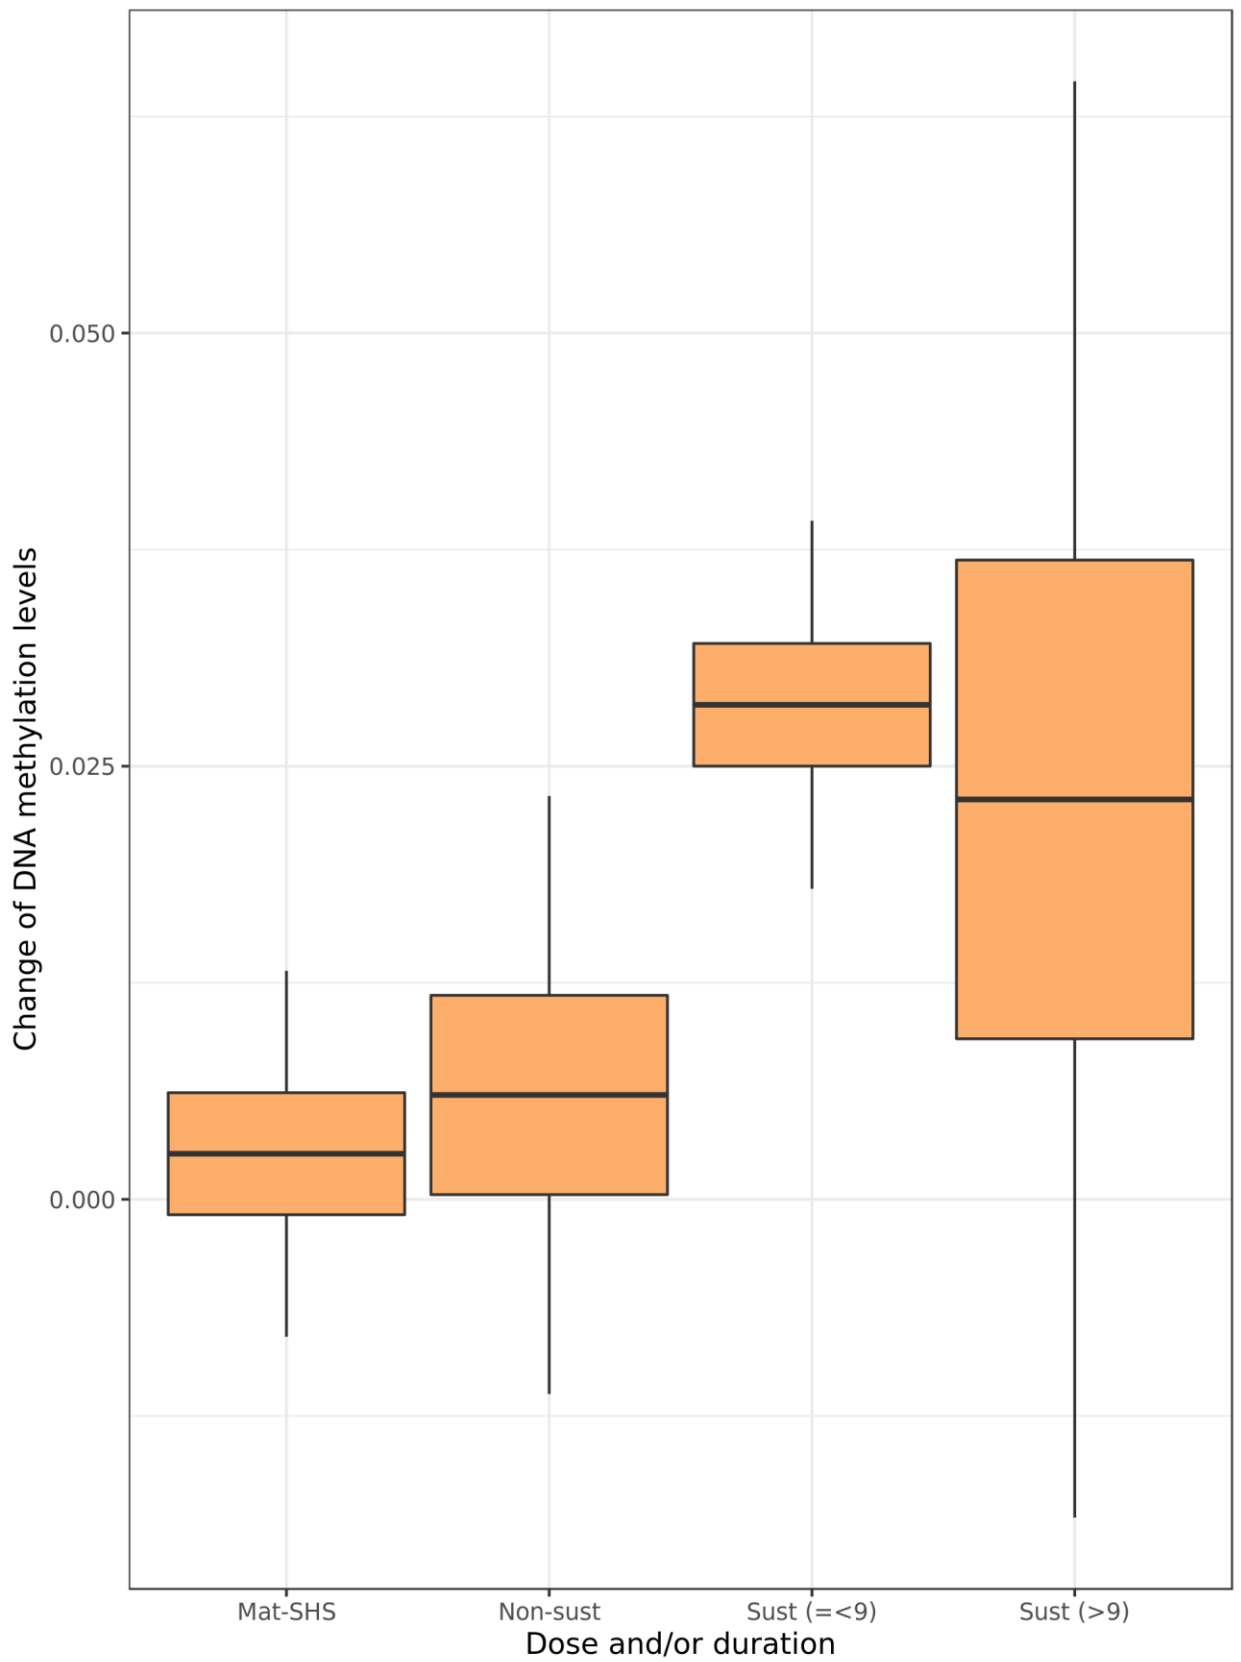



cg14204430

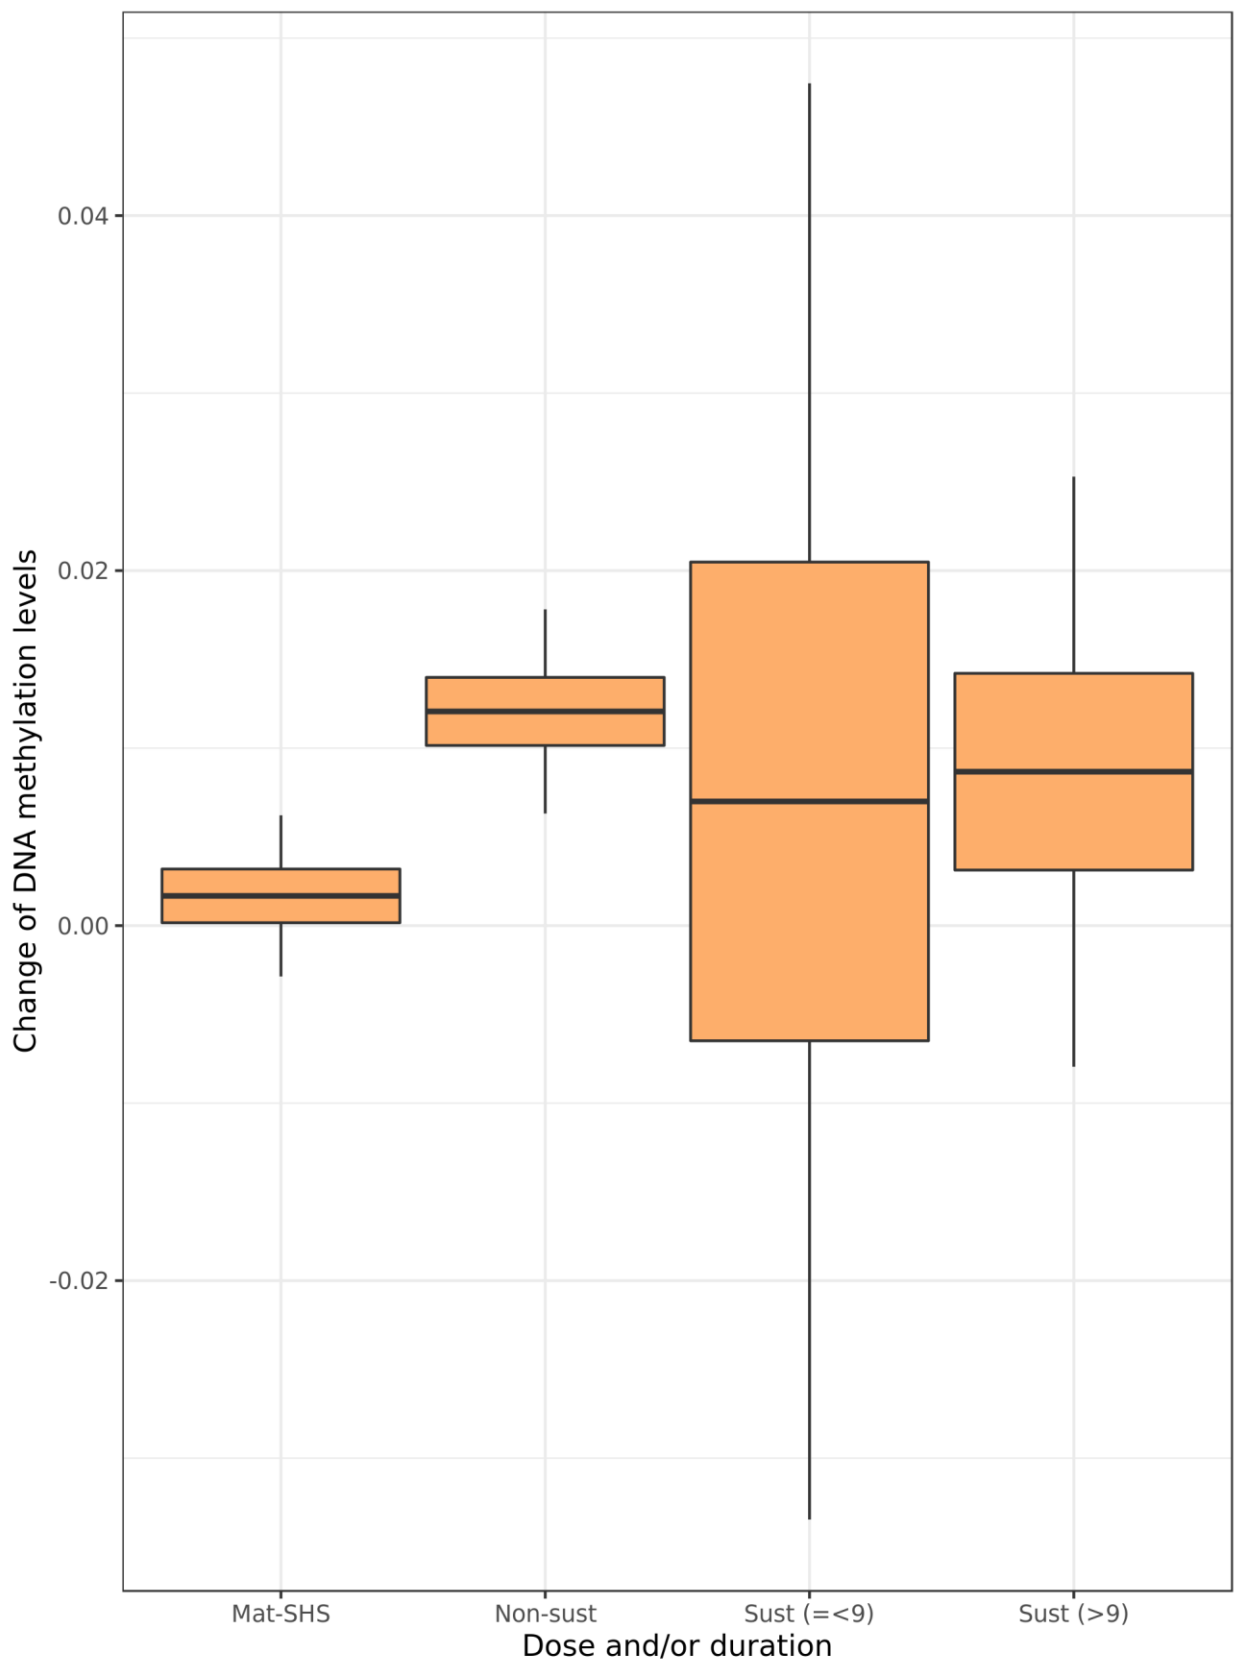

Supplement: MOESM4 [file 12916_2020_1686_MOESM4_ESM.pdf]
