# Supplementary material for: In utero and childhood exposure to tobacco smoke and multi-layer molecular signatures in children
Source: BMC Med. 2020 Aug 19;18:243. doi: 10.1186/s12916-020-01686-8 (PMC7437049; doi:10.1186/s12916-020-01686-8)
Supplement: Supplementary file 1 — Additional file 1: Table S1. Years of enrollment in the cohort, years of HELIX vist and years when smoking was banned in each cohort (country). Table S2. Proteins targeted in each of the three Magnetic Human Luminex kits from Life Technologies. Table S3. Association of maternal smoking in pregnancy and child blood DNA methylation levels adjusted for global-SHS, ordered by chromosome position. Table S4. eQTM analyses: Association between child blood DNA methylation levels at 41 CpG sites vs. child blood expression levels of genes within ±500 kb, ordered by p-value. Table S5. Association between maternal smoking in pregnancy and child blood expression levels of top genes, ordered by p-value of sustained maternal smoking in pregnancy. Table S6. Association between maternal smoking in pregnancy and child blood expression levels of genes within ±500 kb, ordered by p-value of sustained- maternal smoking in pregnancy. Table S7. Association of maternal smoking in pregnancy and child molecular phenotypes adjusted for global-SHS. Table S8. Association of childhood SHS and child molecular phenotpyes adjusted for sustained maternal smoking in pregnancy. Table S9. Comparison of the association of own smoking in adults and SHS in children with serum metabolites, ordered by metabolite name. Table S10. Comparison of the association of own smoking in adults and SHS in children with blood miRNA expression, ordered by miRNA name. Table S11. Comparison of the association of own smoking in adults and SHS in children with blood gene expression, ordered by p-value in children (sustained maternal smoking in pregnancy). Table S12. Comparison of the association of own smoking in adults and SHS in children with blood DNA methylation, ordered by p-value in children (sustained maternal smoking in pregnancy). Table S13. Association of maternal smoking in pregnancy and child DNA methylation levels adjusted for home-SHS. Table S14. Association of maternal smoking in pregnancy and child molecular p [file 12916_2020_1686_MOESM1_ESM.xlsx]

## Sheet: TS1
Table S1. Years of enrollment in the cohort, years of HELIX vist and years when smoking was banned in each cohort (country)
Cohort	Country	City	Years enrollment	Years HELIX visit	Year smoking banned in public places	Year smoking banned in bars and restaurants
BiB	UK	Bradford	2007–2010	2014-2015	2007	2007
EDEN	France	Poitiers	2003–2006	2014-2015	2007	2008
INMA	Spain	Sabadell	2004-2007	2014-2016	2006	2011
KANC	Lithuania	Kaunas	2007-2008	2014-2015	2007	2007
MoBa	Norway	Oslo	1999-2009	2014-2015	2004	2004
RHEA	Greece	Heraklion	2007-2008	2014-2015	2002	2009

## Sheet: TS2
Table S2. Proteins targeted in each of the three Magnetic Human Luminex kits from Life Technologies
Kit	Protein	CV%1	Inclusion/Exclusion
Cytokines 30-plex (pg/ml)	FGF	34.05	Included
	IL1-Beta	20.43	Exclusion: duplicated
	G-CSF	7.98	Inclusion
	IL-10	33.6	Inclusion
	IL-13	27.83	Inclusion
	IL-6	19.45	Exclusion: duplicated
	IL-12	8.54	Inclusion
	RANTES	11.77	Exclusion: >LOQ2
	Eotaxin	21.1	Inclusion
	IL-17	21.34	Inclusion
	MIP-Alfa	3.62	Inclusion
	GM-CSF	35.78	Exclusion: <LOQ1
	MIP-1Beta	8.76	Inclusion
	MCP-1	11.51	Exclusion: duplicated
	IL-15	16.29	Inclusion
	EGF	21.26	Inclusion
	IL-5	36	Inclusion
	HGF	16.15	Exclusion: duplicated
	VEGF	3.42	Exclusion: <LOD
	IFN-Gamma	9.16	Inclusion
	IFN-Alfa	6.62	Inclusion
	IL-1RA	15.39	Inclusion
	TNF-Alfa	11.02	Exclusion: duplicated
	IL-2	14.57	Inclusion
	IL-7	5.52	Exclusion: <LOD
	IP-10	5.59	Inclusion
	IL-2R	12.1	Inclusion
	MIG	18.59	Inclusion
	IL-4	11.73	Inclusion
	IL-8	15.68	Exclusion: duplicated
Apolipoprotein 5-plex (pg/ml)	ApoA1	7.59	Inclusion
	ApoB	9.36	Inclusion
	ApoE	10.33	Inclusion
	Adiponectin	11.85	Inclusion
	CRP	10.37	Inclusion
Adipokine 15-plex (ng/ml)	IL-1Beta	12.75	Inclusion
	IL-6	13.33	Inclusion
	IL-8	13.26	Inclusion
	IL-10	29.95	Exclusion: duplicated
	MCP-1	8.14	Inclusion
	Leptin	16.94	Inclusion
	SAA	5.92	Exclusion: >LOQ2
	HGF	12.84	Inclusion
	Insulin	9.14	Inclusion
	Lipocalin-2	11.32	Exclusion: >LOQ2
	TNF-Alfa	14.22	Inclusion
	BAFF	19.17	Inclusion
	Resistin	17.36	Exclusion: >LOQ2
	C-Peptide	16.13	Inclusion
	Serpine/PAI-1	12.78	Inclusion
1Percentage of coefficient of variation.

## Sheet: TS3
Table S3. Association of maternal smoking in pregnancy and child blood DNA methylation levels adjusted for global-SHS, ordered by chromosome position
All CpGs reaching multiple-testing correction in one of the main models (any or sustained maternal smoking in pregnancy) are shown
				Any maternal smoking in pregnancy				Sustained maternal smoking in pregnancy					Annotation				Joubert et al2: Sustained maternal smoking in pregnancy vs. newborn blood DNA methylation (adj. cell composition)				Joubert et al2: Sustained maternal smoking in pregnancy vs. child blood DNA methylation
Locus	CpG	Chr	Pos	Effect	SE	P-value	Adj. P-value	Effect	SE	P-value	Adj. P-value	% change1	Gene	Gene position	mQTL3	CpG island	Effect	SE	P-value	Adj. P-value	Effect	SE	P-value	Adj. P-value
1	cg18540492	1	50489418	0.0048821	0.0048821	3.44395e-05	no	0.00751678	0.00198976	6.58e-08	yes	53.966	AGBL4	Body		Island
2	cg25189904	1	68299493	-0.0208376	0.000215552	1.14962e-06	yes	-0.0267483	0.000255988	1.54795e-07	yes	28.3656	GNG12	TSS1500	Cis, Trans	S_Shore	-0.0236	0.0019	5.88e-34	8.81302e-30	-0.0194	0.004	1.01e-06	0.000244088
3	cg09935388	1	92947588	-0.020206	0.000556816	3.48654e-05	no	-0.0300251	0.00446905	2.81477e-07	yes	48.5948	GFI1	Body;Body;Body	Cis	Island	-0.1023	0.0044	2.29e-119	2.66002e-114	-0.0206	0.0049	2.969e-05	0.00310875
3	cg14179389	1	92947961	-0.0244407	0.0114713	7.52813e-07	yes	-0.037492	0.00465699	1.08e-10	yes	53.4001	GFI1	Body;Body;Body	Cis	Island	-0.0704	0.0032	2.78e-107	1.84525e-102	-0.0387	0.0048	5.464e-16	6.63657e-13
4	cg18703066	2	105363536	-0.00227926	0.00288554	6.89065e-07	yes	-0.00246881	0.00170026	6.00702e-06	no	8.31618	2q12.1			OpenSea	-0.0083	0.0007	1.179e-32	1.61118e-28	-0.0044	0.0015	0.002981	0.090384
5	cg14204430	4	116035217	0.00801285	0.00442237	2.79676e-06	yes	0.00626862	0.000373352	0.00215833	no	-21.7679	NDST4	TSS200	Trans	OpenSea	0.0063	0.0014	6.02e-06	0.00185606	0.0061	0.0026	0.01797	0.220468
6	cg17924476	5	323794	0.0172442	0.00168335	3.02467e-07	yes	0.0246426	0.00156844	5.39e-10	yes	42.9039	AHRR	Body	Cis	S_Shore	0.0194	0.0019	2.236e-25	2.3087e-21	0.0192	0.004	1.484e-06	0.000321869
6	cg23067299	5	323907	0.00680239	0.00319263	2.07991e-07	yes	0.00838867	0.00343619	7.45e-08	yes	23.3194	AHRR	Body		S_Shore	0.0295	0.0018	6.356e-63	2.27169e-58	0.0096	0.0018	1.156e-07	3.51019e-05
6	cg11902777	5	368843	-0.00824503	0.00223054	8.59e-09	yes	-0.00915271	0.00174525	7.07e-08	yes	11.0088	AHRR	Body	Cis, Trans	N_Shore	-0.006	0.0005	1.017e-36	1.62942e-32	-0.006	0.0009	2.619e-10	1.32543e-07
6	cg05575921	5	373378	-0.0116172	0.00256019	9.27e-12	yes	-0.0146234	0.000439242	3.56e-13	yes	25.8764	AHRR	Body	Cis	N_Shore	-0.0655	0.0021	1.35e-206	6.27253e-201	-0.0131	0.0022	1.873e-09	7.58315e-07
6	cg21161138	5	399360	-0.00957813	0.000179436	1.09087e-06	yes	-0.00933554	0.00167798	6.36843e-05	no	-2.53272	AHRR	Body		OpenSea	-0.0213	0.0013	6.606e-59	2.04624e-54	-0.0066	0.0023	0.004501	0.110666
7	cg01876548	5	124126863	-0.0114755	0.000218543	0.000219315	no	-0.0182513	0.00289919	6.61297e-07	yes	59.0456	5q23.2		Trans	OpenSea
8	cg05767720	6	32117281	0.0126999	0.00495261	0.00118675	no	0.0236613	0.00489653	2.90667e-07	yes	86.3109	PRRT1	Body		N_Shore
9	cg07105221	7	4859448	-0.0180507	0.00140638	3.12616e-05	no	-0.0242716	0.00209834	2.20561e-06	yes	34.4633	RADIL	Body	Cis	S_Shelf
10	cg19089201	7	45002287	0.030808	0.000148257	2.64e-11	yes	0.0355239	0.00252951	1.02e-10	yes	15.3074	MYO1G	3'UTR	Cis, Trans	Island	0.0184	0.001	2.395e-78	1.01163e-73	0.0426	0.0046	1.326e-20	3.76121e-17
10	cg22132788	7	45002486	0.0253183	0.00174354	4.51e-08	yes	0.028908	0.00122781	1.6369e-07	yes	14.1787	MYO1G	Body	Cis	Island	0.0231	0.0011	2.07e-100	1.20224e-95	0.0447	0.0048	1.858e-20	3.76121e-17
10	cg04180046	7	45002736	0.0358184	0.00241869	1.2e-18	yes	0.0415083	0.00233591	6.04e-18	yes	15.8854	MYO1G	Body	Cis	Island	0.0497	0.0021	1.99e-123	3.08206e-118	0.0363	0.0042	3.245e-18	4.92672e-15
10	cg12803068	7	45002919	0.0510006	0.000710315	2.28e-13	yes	0.058861	0.00304152	9.92e-13	yes	15.4124	MYO1G	Body	Cis	S_Shore	0.0701	0.0029	5.57e-128	1.294e-122	0.0701	0.0072	1.314e-22	7.97992e-19
11	cg04598670	7	68697651	-0.0192425	0.00182339	2.92949e-05	no	-0.026287	0.00223923	1.73555e-06	yes	36.6094	7q11.22		Cis, Trans	OpenSea	-0.0235	0.0023	4.622e-24	4.47402e-20	-0.0171	0.0046	0.0002252	0.0145494
12	cg25949550	7	145814306	-0.0118962	0.00307616	1.17e-19	yes	-0.0160308	0.00367015	4.26e-25	yes	34.7554	CNTNAP2	Body		S_Shore	-0.0131	0.0006	1.27e-115	1.18017e-110	-0.0095	0.0016	2.972e-09	1.12806e-06
12	cg11207515	7	146904205	-0.0350348	0.00036855	4.74e-14	yes	-0.0366531	0.000177611	3.31e-11	yes	4.61893	CNTNAP2	Body	Cis, Trans	OpenSea	-0.024	0.0025	1.5e-21	1.34028e-17	-0.0375	0.0053	1.64e-12	1.24496e-09
13	cg17199018	8	28206278	-0.014643	0.00796704	9.51605e-05	no	-0.0214741	0.00090937	1.62039e-06	yes	46.6506	ZNF395	Body		OpenSea	-0.0107	0.0019	1.999e-08	1.98038e-05	-0.0202	0.0042	1.925e-06	0.000403122
14	cg13822849	9	137999757	0.00747321	0.000494213	0.00105059	no	0.0124904	0.00157829	3.9308e-06	yes	67.1354	OLFM1	Body		S_Shelf	0.0046	0.0008	1.444e-09	2.28207e-06	0.0052	0.0013	5.661e-05	0.0047749
15	cg20344448	10	14372431	0.0144655	0.00190445	1.76549e-06	yes	0.018504	0.00530268	2.6277e-07	yes	27.9183	FRMD4A	5'UTR		OpenSea	0.0173	0.0017	1.573e-25	1.66106e-21	0.0127	0.0026	1.045e-06	0.000244088
15	cg11813497	10	14372879	0.0159516	0.00411185	6.82573e-06	no	0.0220685	0.000215059	1.49442e-07	yes	38.3467	FRMD4A	TSS200	Cis	OpenSea	0.0274	0.0021	2.028e-40	3.62413e-36	0.0261	0.0039	3.895e-11	2.36543e-08
15	cg25464840	10	14372910	0.0162486	0.00184623	1.87678e-06	yes	0.0234744	0.00206919	5.03e-09	yes	44.4703	FRMD4A	TSS200	Cis, Trans	OpenSea	0.0208	0.0017	1.113e-35	1.72378e-31	0.023	0.0039	3.743e-09	1.33713e-06
15	cg15507334	10	14372913	0.0184233	0.00131577	2.37e-08	yes	0.0258828	0.00587742	3.64e-11	yes	40.4892	FRMD4A	TSS200	Cis, Trans	OpenSea	0.0197	0.0016	5.536e-33	8.03813e-29	0.0295	0.004	8.41e-14	7.29628e-11
16	cg17454592	15	33360353	-0.00677399	0.000672901	0.000258168	no	-0.0112012	0.00313839	3.91406e-07	yes	65.3559	FMN1	TSS1500	Cis, Trans	OpenSea
17	cg00213123	15	75019070	0.0112849	0.00306149	1.6817e-07	yes	0.0148914	0.00416394	5.16e-09	yes	31.9589	CYP1A1	TSS1500		Island	0.0121	0.0014	1.783e-18	1.23648e-14	0.0148	0.0033	6.643e-06	0.00104907
17	cg05549655	15	75019143	0.0258608	0.00195251	8.34e-15	yes	0.0341827	0.00287043	3.68e-18	yes	32.1799	CYP1A1	TSS1500		Island	0.0192	0.0013	2.214e-51	5.14348e-47	0.0121	0.0019	1.724e-10	9.51805e-08
17	cg17852385	15	75019188	0.0226681	0.0034845	5.28e-08	yes	0.028022	0.00367001	1.47e-08	yes	23.6189	CYP1A1	TSS1500	Trans	Island	0.0147	0.0016	4.263e-19	3.12901e-15	0.0145	0.0029	3.981e-07	0.000109894
17	cg13570656	15	75019196	0.0417468	0.00495786	6.67e-11	yes	0.0540122	0.000852944	9.47e-13	yes	29.3806	CYP1A1	TSS1500	Trans	Island	0.0466	0.0035	4.522e-41	8.40426e-37	0.0329	0.0062	1.272e-07	3.6785e-05
17	cg12101586	15	75019203	0.0308296	0.00146343	3.97e-08	yes	0.036367	0.00380856	5.46e-08	yes	17.9613	CYP1A1	TSS1500	Trans	Island	0.0456	0.003	4.017e-51	8.88775e-47	0.0306	0.0055	2.212e-08	7.46304e-06
17	cg22549041	15	75019251	0.0409717	0.00393117	5.84e-09	yes	0.049087	0.001741	4.52e-09	yes	19.8071	CYP1A1	TSS1500		Island	0.0656	0.0039	4.511e-62	1.49711e-57	0.0509	0.0067	3.045e-14	3.08205e-11
17	cg11924019	15	75019283	0.0228715	0.00213122	1.47e-09	yes	0.028188	0.00266906	3.47e-10	yes	23.2452	CYP1A1	TSS1500	Trans	Island	0.025	0.0017	1.101e-48	2.32527e-44	0.0162	0.0027	1.393e-09	6.04264e-07
17	cg18092474	15	75019302	0.027866	0.00146644	6.35512e-07	yes	0.0350179	0.0137019	1.35497e-07	yes	25.6656	CYP1A1	TSS1500		Island	0.0511	0.0034	1.35e-51	3.30133e-47	0.0296	0.0059	6.406e-07	0.000169146
17	cg26516004	15	75019376	0.00381388	0.00102587	1.37315e-06	yes	0.00482372	0.00221328	2.56377e-07	yes	26.4779	CYP1A1	TSS1500		S_Shore	0.013	0.001	5.099e-39	8.77466e-35	0.0096	0.0014	1.346e-11	9.08251e-09
18	cg01664727	21	36258423	0.0358103	0.00374711	3.74641e-06	no	0.0480371	0.00228003	1.94058e-07	yes	34.1431	RUNX1	Body;Body;Body	Cis, Trans	N_Shore	0.0044	0.0016	0.007043	0.19009	0.0235	0.0061	0.0001227	0.00887092
18	cg03142697	21	36258497	0.0407749	0.00148559	2.22159e-05	no	0.0568937	0.00214902	7.44522e-07	yes	39.5311	RUNX1	Body;Body;Body	Cis	N_Shore	0.007	0.0014	2.199e-07	0.000138258	0.0175	0.0051	0.0006515	0.0322363
18	cg02869559	21	36259067	0.0408611	0.00116116	3.70892e-05	no	0.0565779	0.0017643	1.73483e-06	yes	38.4639	RUNX1	Body;Body;Body	Cis	Island
18	cg00994804	21	36259383	0.0482284	0.00026399	4.84235e-05	no	0.0657616	0.00177265	3.58879e-06	yes	36.3545	RUNX1	1stExon;1stExon;Body	Cis	Island	0.0085	0.0021	6.554e-05	0.0110493	0.0467	0.0104	7.341e-06	0.00111455
1Percentage change of the effect comparing sustained vs any maternal smoking in pregnancy [Sign(Max(βSust;βAny))*(βSust. - βAny)/|βAny|*100].
2Only CpGs reaching 5% FDR in Joubert et al in newborn cord blood DNA methylation are shown.
3mQTL (methylation quantitative trait locus) according to the mqtldb database: child blood - MatrixEQTL results (http://www.mqtldb.org/)

## Sheet: TS4
Table S4. eQTM analyses: Association between child blood DNA methylation levels at 41 CpG sites vs. child blood expression levels of genes within ± 500 kb, ordered by p-value
			eQTM					CpG annotation					Transctipt cluster annotation
Locus	CpG	TC1	Effect	SE	P-value	Adj. P-value	Effect of maternal smoking in pregnancy on methylation	Chr	Pos	UCSC RefGene	Gene position	CpG island	Chr	Strand	Start	Stop	TSS2	GeneSymbol	Distance (kb)
10	cg12803068	TC07002924.hg.1	0.611817	0.152801	6.76836e-05	yes	+	7	45002919	MYO1G	Body	S_Shore	7	-	44998599	45000392	45000392	LOC285957	-2.527
13	cg17199018	TC08000217.hg.1	-0.428696	0.108496	8.4145e-05	yes	-	8	28206278	ZNF395	Body	OpenSea	8	+	28174503	28200872	28174503	PNOC	-31.775
10	cg19089201	TC07002924.hg.1	0.914706	0.233351	9.56709e-05	yes	+	7	45002287	MYO1G	3'UTR	Island	7	-	44998599	45000392	45000392	LOC285957	-1.895
18	cg02869559	TC21000425.hg.1	0.356016	0.0929535	0.000137469	yes	+	21	36259067	RUNX1	Body	Island	21	-	36410233	36411723	36411723	RUNX1-IT1	152.656
18	cg03142697	TC21000425.hg.1	0.360703	0.0956549	0.000173851	yes	+	21	36258497	RUNX1	Body	N_Shore	21	-	36410233	36411723	36411723	RUNX1-IT1	153.226
17	cg13570656	TC15001649.hg.1	0.136998	0.0365994	0.000193844	yes	+	15	75019196	CYP1A1	TSS1500	Island	15	-	75128459	75135552	75135552	ULK3	116.356
18	cg00994804	TC21000425.hg.1	0.283435	0.0775967	0.000275306	yes	+	21	36259383	RUNX1	1stExon;Body	Island	21	-	36410233	36411723	36411723	RUNX1-IT1	152.34
18	cg01664727	TC21000425.hg.1	0.431125	0.118123	0.000278361	yes	+	21	36258423	RUNX1	Body	N_Shore	21	-	36410233	36411723	36411723	RUNX1-IT1	153.3
6	cg11902777	TC05000006.hg.1	-0.694128	0.190342	0.000281628	yes	-	5	368843	AHRR	Body	N_Shore	5	+	443273	472052	443273	EXOC3	74.43
10	cg22132788	TC07002924.hg.1	0.849877	0.234213	0.000301799	yes	+	7	45002486	MYO1G	Body	Island	7	-	44998599	45000392	45000392	LOC285957	-2.094
18	cg02869559	TC21000946.hg.1	0.334897	0.0928146	0.000326162	yes	+	21	36259067	RUNX1	Body	Island	21	-	36410233	36411723	36411723	RUNX1-IT1	152.656
6	cg21161138	TC05002792.hg.1	1.04792	0.290671	0.000329971	yes	-	5	399360	AHRR	Body	OpenSea	5	-	26322	37720	37720		-361.64
18	cg03142697	TC21000946.hg.1	0.341556	0.0954999	0.000367747	yes	+	21	36258497	RUNX1	Body	N_Shore	21	-	36410233	36411723	36411723	RUNX1-IT1	153.226
17	cg17852385	TC15001649.hg.1	0.199682	0.0564205	0.00042301	yes	+	15	75019188	CYP1A1	TSS1500	Island	15	-	75128459	75135552	75135552	ULK3	116.364
18	cg00994804	TC21000946.hg.1	0.270997	0.0774565	0.000491645	yes	+	21	36259383	RUNX1	1stExon;Body	Island	21	-	36410233	36411723	36411723	RUNX1-IT1	152.34
8	cg05767720	TC06000395.hg.1	0.465869	0.138475	0.000801543	no	+	6	32117281	PRRT1	Body	N_Shore	6	+	32146131	32151930	32146131	RNF5;RNF5P1	28.85
8	cg05767720	TC06002724.hg.1	0.666407	0.198374	0.000815812	no	+	6	32117281	PRRT1	Body	N_Shore	6	+	32146232	32148567	32146232	RNF5P1	28.951
10	cg04180046	TC07002924.hg.1	0.867357	0.259875	0.000881514	no	+	7	45002736	MYO1G	Body	Island	7	-	44998599	45000392	45000392	LOC285957	-2.344
3	cg09935388	TC01002867.hg.1	-0.210444	0.0649013	0.00123058	no	-	1	92947588	GFI1	Body	Island	1	-	92940318	92952433	92952433	GFI1	4.845
17	cg12101586	TC15001649.hg.1	0.13617	0.0421506	0.00128265	no	+	15	75019203	CYP1A1	TSS1500	Island	15	-	75128459	75135552	75135552	ULK3	116.349
18	cg01664727	TC21000946.hg.1	0.378379	0.118042	0.00139845	no	+	21	36258423	RUNX1	Body	N_Shore	21	-	36410233	36411723	36411723	RUNX1-IT1	153.3
6	cg21161138	TC05002805.hg.1	-0.557106	0.178535	0.00186646	no	-	5	399360	AHRR	Body	OpenSea	5	-	863850	892939	892939	BRD9	493.579
17	cg05549655	TC15001649.hg.1	0.217425	0.069809	0.00190345	no	+	15	75019143	CYP1A1	TSS1500	Island	15	-	75128459	75135552	75135552	ULK3	116.409
8	cg05767720	TC06001569.hg.1	3.25401	1.05252	0.0020551	no	+	6	32117281	PRRT1	Body	N_Shore	6	-	32546123	32546497	32546497	HLA-DRB4	429.216
6	cg21161138	TC05003404.hg.1	-0.340333	0.110605	0.00215744	no	-	5	399360	AHRR	Body	OpenSea	5	-	863850	892939	892939	BRD9	493.579
17	cg22549041	TC15001649.hg.1	0.102194	0.0336698	0.00247659	no	+	15	75019251	CYP1A1	TSS1500	Island	15	-	75128459	75135552	75135552	ULK3	116.301
3	cg14179389	TC01000855.hg.1	0.531032	0.178649	0.00303673	no	-	1	92947961	GFI1	Body	Island	1	+	93303575	93303627	93303575		355.614
8	cg05767720	TC06003602.hg.1	3.02035	1.04065	0.00379861	no	+	6	32117281	PRRT1	Body	N_Shore	6	-	32546123	32546497	32546497		429.216
17	cg18092474	TC15001649.hg.1	0.121122	0.041922	0.00395947	no	+	15	75019302	CYP1A1	TSS1500	Island	15	-	75128459	75135552	75135552	ULK3	116.25
6	cg17924476	TC05000005.hg.1	0.115224	0.0406937	0.00474182	no	+	5	323794	AHRR	Body	S_Shore	5	+	271736	438406	271736	AHRR;PDCD6	-52.058
13	cg17199018	TC08000222.hg.1	-0.227183	0.0808665	0.00507721	no	-	8	28206278	ZNF395	Body	OpenSea	8	+	28457986	28613116	28457986	EXTL3	251.708
17	cg00213123	TC15001654.hg.1	1.3696	0.509006	0.00726822	no	+	15	75019070	CYP1A1	TSS1500	Island	15	-	75275615	75275717	75275717		256.647
18	cg00994804	TC21000696.hg.1	0.0992277	0.0369028	0.00730829	no	+	21	36259383	RUNX1	1stExon;Body	Island	21	+	36399049	36403858	36399049		139.666
17	cg26516004	TC15001649.hg.1	0.804344	0.29986	0.00745062	no	+	15	75019376	CYP1A1	TSS1500	S_Shore	15	-	75128459	75135552	75135552	ULK3	116.176
8	cg05767720	TC06001547.hg.1	0.484579	0.181564	0.00775389	no	+	6	32117281	PRRT1	Body	N_Shore	6	-	31783320	31785722	31785722	HSPA1A	-331.559
17	cg13570656	TC15000685.hg.1	0.179569	0.067792	0.00822601	no	+	15	75019196	CYP1A1	TSS1500	Island	15	+	75074425	75095539	75074425	CSK	55.229
18	cg03142697	TC21000696.hg.1	0.120268	0.0455203	0.00839045	no	+	21	36258497	RUNX1	Body	N_Shore	21	+	36399049	36403858	36399049		140.552
18	cg02869559	TC21000696.hg.1	0.116213	0.0442482	0.00878404	no	+	21	36259067	RUNX1	Body	Island	21	+	36399049	36403858	36399049		139.982
17	cg11924019	TC15001649.hg.1	0.162718	0.0624577	0.00934004	no	+	15	75019283	CYP1A1	TSS1500	Island	15	-	75128459	75135552	75135552	ULK3	116.269
8	cg05767720	TC06002723.hg.1	0.207279	0.0806941	0.0103765	no	+	6	32117281	PRRT1	Body	N_Shore	6	+	32121776	32136062	32121776	EGFL8;PPT2-EGFL8	4.495
8	cg05767720	TC06004122.hg.1	6.28259	2.45403	0.0106346	no	+	6	32117281	PRRT1	Body	N_Shore	6	-	32485120	32498064	32498064	HLA-DRB5	380.783
6	cg05575921	TC05000005.hg.1	-0.198972	0.0783095	0.011234	no	-	5	373378	AHRR	Body	N_Shore	5	+	271736	438406	271736	AHRR;PDCD6	-101.642
6	cg21161138	TC05002801.hg.1	-0.454107	0.179462	0.011572	no	-	5	399360	AHRR	Body	OpenSea	5	-	710470	767576	767576		368.216
6	cg17924476	TC05000006.hg.1	0.201314	0.0799435	0.0119768	no	+	5	323794	AHRR	Body	S_Shore	5	+	443273	472052	443273	EXOC3	119.479
6	cg21161138	TC05003402.hg.1	-0.424981	0.168968	0.0120801	no	-	5	399360	AHRR	Body	OpenSea	5	-	710472	767323	767323	ZDHHC11B	367.963
14	cg13822849	TC09001712.hg.1	0.39844	0.159456	0.0126498	no	+	9	137999757	OLFM1	Body	S_Shelf	9	-	138137542	138144554	138144554		144.797
1	cg18540492	TC01002645.hg.1	1.95556	0.802924	0.0150724	no	+	1	50489418	AGBL4	Body	Island	1	-	50965430	50965529	50965529		476.111
15	cg11813497	TC10000111.hg.1	0.36699	0.152051	0.016005	no	+	10	14372879	FRMD4A	TSS200	OpenSea	10	+	14694741	14703690	14694741		321.862
10	cg19089201	TC07002291.hg.1	0.242316	0.101535	0.0172243	no	+	7	45002287	MYO1G	3'UTR	Island	7	+	45431940	45436006	45431940		429.653
8	cg05767720	TC06000397.hg.1	-0.382636	0.163612	0.0195816	no	+	6	32117281	PRRT1	Body	N_Shore	6	+	32320654	32320760	32320654		203.373
18	cg03142697	TC21000692.hg.1	-0.0810488	0.0352942	0.0218953	no	+	21	36258497	RUNX1	Body	N_Shore	21	+	36096105	36109479	36096105		-162.392
17	cg18092474	TC15001650.hg.1	-0.231946	0.10142	0.0224403	no	+	15	75019302	CYP1A1	TSS1500	Island	15	-	75136071	75165719	75165719	SCAMP2	146.417
8	cg05767720	TC06004123.hg.1	0.976304	0.428447	0.0229301	no	+	6	32117281	PRRT1	Body	N_Shore	6	-	32546546	32578053	32578053	HLA-DRB1	460.772
12	cg11207515	TC07001992.hg.1	-0.41356	0.182146	0.0234259	no	-	7	146904205	CNTNAP2	Body	OpenSea	7	-	147202469	147202565	147202565		298.36
4	cg18703066	TC02004461.hg.1	-2.07109	0.913795	0.0236712	no	-	2	105363536			OpenSea	2	-	105104914	105136671	105136671	LINC01103	-226.865
6	cg05575921	TC05000006.hg.1	-0.348234	0.15381	0.0238201	no	-	5	373378	AHRR	Body	N_Shore	5	+	443273	472052	443273	EXOC3	69.895
10	cg12803068	TC07001353.hg.1	0.171214	0.0756496	0.0238702	no	+	7	45002919	MYO1G	Body	S_Shore	7	-	45144505	45144641	45144641	SNORA5C	141.722
6	cg21161138	TC05000006.hg.1	-0.309858	0.139403	0.026493	no	-	5	399360	AHRR	Body	OpenSea	5	+	443273	472052	443273	EXOC3	43.913
17	cg13570656	TC15001654.hg.1	0.380641	0.171258	0.0265018	no	+	15	75019196	CYP1A1	TSS1500	Island	15	-	75275615	75275717	75275717		256.521
8	cg05767720	TC06002725.hg.1	-0.288291	0.13138	0.0284796	no	+	6	32117281	PRRT1	Body	N_Shore	6	+	32358287	32361468	32358287	HCG23	241.006
6	cg21161138	TC05003403.hg.1	-0.205286	0.0936295	0.0286096	no	-	5	399360	AHRR	Body	OpenSea	5	-	795720	851101	851101	ZDHHC11	451.741
17	cg17852385	TC15002625.hg.1	-0.196429	0.0902884	0.0298602	no	+	15	75019188	CYP1A1	TSS1500	Island	15	-	75515790	75516799	75516799		497.611
14	cg13822849	TC09002346.hg.1	0.267461	0.123624	0.0307787	no	+	9	137999757	OLFM1	Body	S_Shelf	9	+	138466771	138478958	138466771		467.014
9	cg07105221	TC07000045.hg.1	0.0788978	0.0367176	0.0319322	no	-	7	4859448	RADIL	Body	S_Shelf	7	+	4815253	4834026	4815253	AP5Z1	-44.195
10	cg19089201	TC07002922.hg.1	-0.191696	0.0900943	0.033645	no	+	7	45002287	MYO1G	3'UTR	Island	7	-	44824649	44826939	44826939		-175.348
6	cg11902777	TC05002798.hg.1	0.99158	0.467002	0.034016	no	-	5	368843	AHRR	Body	N_Shore	5	-	553527	554002	554002		185.159
6	cg11902777	TC05002175.hg.1	0.970234	0.458955	0.0348031	no	-	5	368843	AHRR	Body	N_Shore	5	+	667579	668841	667579	LOC100132605	298.736
10	cg22132788	TC07002291.hg.1	0.214158	0.101857	0.0357976	no	+	7	45002486	MYO1G	Body	Island	7	+	45431940	45436006	45431940		429.454
17	cg13570656	TC15001653.hg.1	-0.0789556	0.0376932	0.0364918	no	+	15	75019196	CYP1A1	TSS1500	Island	15	-	75246757	75249805	75249805	RPP25	230.609
1	cg18540492	TC01000614.hg.1	-0.311769	0.15046	0.0385546	no	+	1	50489418	AGBL4	Body	Island	1	+	50513686	50669458	50513686	ELAVL4	24.268
10	cg12803068	TC07002291.hg.1	0.137193	0.0665676	0.0396082	no	+	7	45002919	MYO1G	Body	S_Shore	7	+	45431940	45436006	45431940		429.021
17	cg00213123	TC15002282.hg.1	0.411655	0.200341	0.0402041	no	+	15	75019070	CYP1A1	TSS1500	Island	15	+	74779937	74796235	74779937		-239.133
17	cg13570656	TC15000687.hg.1	-0.134329	0.0654168	0.0403332	no	+	15	75019196	CYP1A1	TSS1500	Island	15	+	75182363	75191798	75182363	MPI	163.167
5	cg14204430	TC04000592.hg.1	-0.538841	0.263409	0.0410966	no	+	4	116035217	NDST4	TSS200	OpenSea	4	+	115720487	115720786	115720487		-314.73
6	cg23067299	TC05000005.hg.1	0.214638	0.105342	0.0419041	no	+	5	323907	AHRR	Body	S_Shore	5	+	271736	438406	271736	AHRR;PDCD6	-52.171
14	cg13822849	TC09002846.hg.1	0.340267	0.1686	0.0438837	no	+	9	137999757	OLFM1	Body	S_Shelf	9	-	138137542	138144554	138144554		144.797
17	cg17852385	TC15002284.hg.1	-0.29939	0.148867	0.0446256	no	+	15	75019188	CYP1A1	TSS1500	Island	15	+	75287876	75313836	75287876	SCAMP5	268.688
17	cg13570656	TC15002800.hg.1	0.101832	0.0509981	0.0461645	no	+	15	75019196	CYP1A1	TSS1500	Island	15	+	74890843	74901066	74890843	CLK3	-128.353
9	cg07105221	TC07000043.hg.1	-0.133618	0.0676486	0.0485686	no	-	7	4859448	RADIL	Body	S_Shelf	7	+	4683388	4811074	4683388	FOXK1	-176.06
6	cg21161138	TC05002804.hg.1	-0.243625	0.123635	0.0491002	no	-	5	399360	AHRR	Body	OpenSea	5	-	858994	860350	860350		460.99
15	cg20344448	TC10000111.hg.1	0.342677	0.175411	0.0510773	no	+	10	14372431	FRMD4A	5'UTR	OpenSea	10	+	14694741	14703690	14694741		322.31
17	cg00213123	TC15002285.hg.1	-0.418114	0.214193	0.0512591	no	+	15	75019070	CYP1A1	TSS1500	Island	15	+	75288945	75289555	75288945		269.875
18	cg01664727	TC21000694.hg.1	0.15707	0.0805669	0.0515547	no	+	21	36258423	RUNX1	Body;Body;Body	N_Shore	21	+	36299506	36301769	36299506		41.083
18	cg00994804	TC21000420.hg.1	-0.0323108	0.0165738	0.0515612	no	+	21	36259383	RUNX1	1stExon;1stExon;Body	Island	21	-	35885440	35987441	35987441	RCAN1	-271.942
17	cg13570656	TC15002625.hg.1	-0.114181	0.0586513	0.0518882	no	+	15	75019196	CYP1A1	TSS1500	Island	15	-	75515790	75516799	75516799		497.603
10	cg22132788	TC07002922.hg.1	-0.174383	0.0903554	0.0539407	no	+	7	45002486	MYO1G	Body	Island	7	-	44824649	44826939	44826939		-175.547
4	cg18703066	TC02000641.hg.1	1.73275	0.898697	0.054177	no	-	2	105363536			OpenSea	2	+	105471968	105476929	105471968	POU3F3	108.432
3	cg09935388	TC01002870.hg.1	-0.22515	0.116793	0.0542145	no	-	1	92947588	GFI1	Body;Body;Body	Island	1	-	93298286	93427079	93427079	FAM69A	479.491
10	cg22132788	TC07001348.hg.1	-0.228361	0.118534	0.0543671	no	+	7	45002486	MYO1G	Body	Island	7	-	45002260	45018704	45018704	MYO1G	16.218
18	cg02869559	TC21000418.hg.1	0.0904009	0.0469616	0.054561	no	+	21	36259067	RUNX1	Body;Body;Body	Island	21	-	35818988	35884573	35884573	KCNE1	-374.494
10	cg04180046	TC07002291.hg.1	0.216398	0.112934	0.0556786	no	+	7	45002736	MYO1G	Body	Island	7	+	45431940	45436006	45431940		429.204
17	cg05549655	TC15001653.hg.1	-0.137027	0.0717478	0.0564874	no	+	15	75019143	CYP1A1	TSS1500	Island	15	-	75246757	75249805	75249805	RPP25	230.662
6	cg05575921	TC05002802.hg.1	0.740034	0.389002	0.0574555	no	-	5	373378	AHRR	Body	N_Shore	5	-	763495	764229	764229		390.851
6	cg17924476	TC05002173.hg.1	-0.231904	0.122239	0.0581462	no	+	5	323794	AHRR	Body	S_Shore	5	+	468367	472052	468367		144.573
18	cg01664727	TC21000142.hg.1	0.122614	0.0646829	0.0583484	no	+	21	36258423	RUNX1	Body;Body;Body	N_Shore	21	+	36508935	36511519	36508935		250.512
18	cg02869559	TC21000692.hg.1	-0.0647065	0.0343407	0.0598697	no	+	21	36259067	RUNX1	Body;Body;Body	Island	21	+	36096105	36109479	36096105		-162.962
10	cg12803068	TC07000280.hg.1	0.100378	0.0534174	0.0605661	no	+	7	45002919	MYO1G	Body	S_Shore	7	+	45039074	45116069	45039074	CCM2	36.155
17	cg00213123	TC15001653.hg.1	-0.210723	0.112236	0.0607902	no	+	15	75019070	CYP1A1	TSS1500	Island	15	-	75246757	75249805	75249805	RPP25	230.735
18	cg02869559	TC21000142.hg.1	0.0955987	0.0509418	0.0609091	no	+	21	36259067	RUNX1	Body;Body;Body	Island	21	+	36508935	36511519	36508935		249.868
17	cg11924019	TC15000685.hg.1	0.216626	0.115441	0.0609263	no	+	15	75019283	CYP1A1	TSS1500	Island	15	+	75074425	75095539	75074425	CSK	55.142
8	cg05767720	TC06001541.hg.1	-0.268621	0.143309	0.0612124	no	+	6	32117281	PRRT1	Body	N_Shore	6	-	31732087	31733365	31733365		-383.916
18	cg00994804	TC21000417.hg.1	-0.0716789	0.0382664	0.0613875	no	+	21	36259383	RUNX1	1stExon;1stExon;Body	Island	21	-	35791013	35796264	35796264	KCNE1	-463.119
14	cg13822849	TC09000792.hg.1	-0.316267	0.170074	0.0632876	no	+	9	137999757	OLFM1	Body	S_Shelf	9	+	138235095	138238408	138235095	C9orf62	235.338
9	cg07105221	TC07001112.hg.1	-0.207149	0.111732	0.0640856	no	-	7	4859448	RADIL	Body	S_Shelf	7	-	4897364	4901625	4901625	PAPOLB	42.177
18	cg01664727	TC21000696.hg.1	0.104267	0.0562994	0.064369	no	+	21	36258423	RUNX1	Body;Body;Body	N_Shore	21	+	36399049	36403858	36399049		140.626
7	cg01876548	TC05001731.hg.1	0.242814	0.131884	0.0659505	no	-	5	124126863			OpenSea	5	-	123972608	124084500	124084500	ZNF608	-42.363
6	cg11902777	TC05002174.hg.1	-0.473351	0.257328	0.0661901	no	-	5	368843	AHRR	Body	N_Shore	5	+	524820	526709	524820		155.977
3	cg14179389	TC01002867.hg.1	-0.113098	0.0615028	0.0662761	no	-	1	92947961	GFI1	Body;Body;Body	Island	1	-	92940318	92952433	92952433	GFI1	4.472
8	cg05767720	TC06000377.hg.1	0.133624	0.0728165	0.0668403	no	+	6	32117281	PRRT1	Body	N_Shore	6	+	31620187	31625987	31620187	APOM	-497.094
6	cg17924476	TC05001091.hg.1	0.537234	0.293813	0.0678237	no	+	5	323794	AHRR	Body	S_Shore	5	-	144202	144312	144312		-179.482
6	cg11902777	TC05000008.hg.1	-0.504086	0.276005	0.0681429	no	-	5	368843	AHRR	Body	N_Shore	5	+	524820	526709	524820		155.977
17	cg05549655	TC15002625.hg.1	-0.203693	0.111623	0.0683743	no	+	15	75019143	CYP1A1	TSS1500	Island	15	-	75515790	75516799	75516799		497.656
16	cg17454592	TC15000223.hg.1	0.867047	0.476907	0.0694039	no	-	15	33360353	FMN1	TSS1500	OpenSea	15	+	32907345	32932150	32907345	ARHGAP11A	-453.008
17	cg18092474	TC15000687.hg.1	-0.135721	0.0747259	0.069682	no	+	15	75019302	CYP1A1	TSS1500	Island	15	+	75182363	75191798	75182363	MPI	163.061
10	cg12803068	TC07001348.hg.1	-0.140637	0.0774779	0.0698437	no	+	7	45002919	MYO1G	Body	S_Shore	7	-	45002260	45018704	45018704	MYO1G	15.785
3	cg14179389	TC01000853.hg.1	-0.136658	0.0754202	0.070344	no	-	1	92947961	GFI1	Body;Body;Body	Island	1	+	92764522	92853732	92764522	RPAP2	-183.439
6	cg21161138	TC05001099.hg.1	-0.240169	0.132641	0.0705421	no	-	5	399360	AHRR	Body	OpenSea	5	-	659977	693510	693510	TPPP	294.15
18	cg02869559	TC21000417.hg.1	-0.0829613	0.0458808	0.0709279	no	+	21	36259067	RUNX1	Body;Body;Body	Island	21	-	35791013	35796264	35796264	KCNE1	-462.803
6	cg23067299	TC05002792.hg.1	-0.782446	0.433326	0.0713201	no	+	5	323907	AHRR	Body	S_Shore	5	-	26322	37720	37720		-286.187
18	cg03142697	TC21000420.hg.1	-0.0369102	0.0204476	0.0714093	no	+	21	36258497	RUNX1	Body;Body;Body	N_Shore	21	-	35885440	35987441	35987441	RCAN1	-271.056
10	cg04180046	TC07002922.hg.1	-0.180557	0.100166	0.071805	no	+	7	45002736	MYO1G	Body	Island	7	-	44824649	44826939	44826939		-175.797
17	cg11924019	TC15001653.hg.1	-0.115382	0.0640994	0.0722051	no	+	15	75019283	CYP1A1	TSS1500	Island	15	-	75246757	75249805	75249805	RPP25	230.522
18	cg03142697	TC21000417.hg.1	-0.0846538	0.0472035	0.0732654	no	+	21	36258497	RUNX1	Body;Body;Body	N_Shore	21	-	35791013	35796264	35796264	KCNE1	-462.233
17	cg11924019	TC15000688.hg.1	-0.145088	0.0810366	0.0737417	no	+	15	75019283	CYP1A1	TSS1500	Island	15	+	75287876	75313836	75287876	SCAMP5	268.593
6	cg05575921	TC05002175.hg.1	0.65821	0.369398	0.0751294	no	-	5	373378	AHRR	Body	N_Shore	5	+	667579	668841	667579	LOC100132605	294.201
8	cg05767720	TC06004076.hg.1	0.256965	0.144679	0.0760704	no	+	6	32117281	PRRT1	Body	N_Shore	6	+	31865562	31913449	31865562	C2	-251.719
18	cg00994804	TC21000692.hg.1	-0.0506426	0.0286526	0.0775054	no	+	21	36259383	RUNX1	1stExon;1stExon;Body	Island	21	+	36096105	36109479	36096105		-163.278
8	cg05767720	TC06002716.hg.1	0.200342	0.113678	0.0783645	no	+	6	32117281	PRRT1	Body	N_Shore	6	+	31683134	31685581	31683134	LY6G6D	-434.147
17	cg17852385	TC15001653.hg.1	-0.102388	0.0581003	0.0783814	no	+	15	75019188	CYP1A1	TSS1500	Island	15	-	75246757	75249805	75249805	RPP25	230.617
4	cg18703066	TC02002163.hg.1	0.911419	0.517842	0.0787594	no	-	2	105363536			OpenSea	2	-	105481865	105489053	105489053	LINC01159	125.517
5	cg14204430	TC04001488.hg.1	-0.152731	0.0869996	0.0795255	no	+	4	116035217	NDST4	TSS200	OpenSea	4	-	115748919	116035032	116035032	NDST4	-0.185
7	cg01876548	TC05002599.hg.1	0.401766	0.230615	0.0818414	no	-	5	124126863			OpenSea	5	+	123833015	123840793	123833015		-293.848
17	cg13570656	TC15000682.hg.1	0.0776221	0.0445989	0.0821398	no	+	15	75019196	CYP1A1	TSS1500	Island	15	+	74833518	74890472	74833518	ARID3B	-185.678
8	cg05767720	TC06001535.hg.1	-0.122251	0.0714277	0.0873432	no	+	6	32117281	PRRT1	Body	N_Shore	6	-	31644461	31651817	31651817	LY6G5C	-465.464
10	cg12803068	TC07002288.hg.1	0.143439	0.0839164	0.0877552	no	+	7	45002919	MYO1G	Body	S_Shore	7	+	45039345	45116069	45039345	CCM2	36.426
17	cg17852385	TC15000685.hg.1	0.178694	0.104666	0.0881327	no	+	15	75019188	CYP1A1	TSS1500	Island	15	+	75074425	75095539	75074425	CSK	55.237
14	cg13822849	TC09002345.hg.1	-0.308094	0.180477	0.0881641	no	+	9	137999757	OLFM1	Body	S_Shelf	9	+	138359934	138364095	138359934		360.177
17	cg17852385	TC15000682.hg.1	0.116654	0.0686995	0.0898648	no	+	15	75019188	CYP1A1	TSS1500	Island	15	+	74833518	74890472	74833518	ARID3B	-185.67
6	cg05575921	TC05002799.hg.1	0.329247	0.194966	0.0916338	no	-	5	373378	AHRR	Body	N_Shore	5	-	602735	612325	612325		238.947
17	cg26516004	TC15002279.hg.1	-1.56145	0.924779	0.0916875	no	+	15	75019376	CYP1A1	TSS1500	S_Shore	15	+	74646797	74656960	74646797		-372.579
6	cg05575921	TC05001095.hg.1	0.232408	0.137687	0.0917876	no	-	5	373378	AHRR	Body	N_Shore	5	-	466239	473213	473213	PP7080	99.835
14	cg13822849	TC09000790.hg.1	0.208541	0.123637	0.0920207	no	+	9	137999757	OLFM1	Body	S_Shelf	9	+	137967089	138013030	137967089	OLFM1	-32.668
6	cg05575921	TC05001093.hg.1	0.475545	0.282117	0.0922316	no	-	5	373378	AHRR	Body	N_Shore	5	-	269973	271631	271631		-101.747
17	cg11924019	TC15002284.hg.1	-0.276925	0.164366	0.0923907	no	+	15	75019283	CYP1A1	TSS1500	Island	15	+	75287876	75313836	75287876	SCAMP5	268.593
18	cg01664727	TC21000418.hg.1	0.100383	0.059662	0.092831	no	+	21	36258423	RUNX1	Body;Body;Body	N_Shore	21	-	35818988	35884573	35884573	KCNE1	-373.85
8	cg05767720	TC06004118.hg.1	0.11313	0.0674797	0.0940041	no	+	6	32117281	PRRT1	Body	N_Shore	6	-	31694815	31698040	31698040	DDAH2	-419.241
14	cg13822849	TC09000801.hg.1	0.306506	0.183453	0.0951339	no	+	9	137999757	OLFM1	Body	S_Shelf	9	+	138480455	138482681	138480455		480.698
18	cg02869559	TC21000945.hg.1	0.138727	0.0835334	0.0971315	no	+	21	36259067	RUNX1	Body;Body;Body	Island	21	-	36314114	36317337	36317337		58.27
17	cg12101586	TC15000684.hg.1	0.080814	0.0486884	0.0973168	no	+	15	75019203	CYP1A1	TSS1500	Island	15	+	75041184	75048941	75041184	CYP1A2	21.981
18	cg00994804	TC21000945.hg.1	0.115429	0.0696803	0.0979776	no	+	21	36259383	RUNX1	1stExon;1stExon;Body	Island	21	-	36314114	36317337	36317337		57.954
17	cg05549655	TC15001650.hg.1	-0.280086	0.169263	0.0983434	no	+	15	75019143	CYP1A1	TSS1500	Island	15	-	75136071	75165719	75165719	SCAMP2	146.576
17	cg18092474	TC15000688.hg.1	-0.0900996	0.0544563	0.0983862	no	+	15	75019302	CYP1A1	TSS1500	Island	15	+	75287876	75313836	75287876	SCAMP5	268.574
18	cg00994804	TC21000418.hg.1	0.0645971	0.0391958	0.0997068	no	+	21	36259383	RUNX1	1stExon;1stExon;Body	Island	21	-	35818988	35884573	35884573	KCNE1	-374.81
10	cg04180046	TC07001353.hg.1	0.211608	0.128479	0.0999191	no	+	7	45002736	MYO1G	Body	Island	7	-	45144505	45144641	45144641	SNORA5C	141.905
17	cg00213123	TC15000684.hg.1	0.207162	0.126083	0.100738	no	+	15	75019070	CYP1A1	TSS1500	Island	15	+	75041184	75048941	75041184	CYP1A2	22.114
17	cg11924019	TC15002800.hg.1	0.141663	0.0867338	0.102773	no	+	15	75019283	CYP1A1	TSS1500	Island	15	+	74890843	74901066	74890843	CLK3	-128.44
17	cg26516004	TC15000689.hg.1	0.823138	0.504152	0.102896	no	+	15	75019376	CYP1A1	TSS1500	S_Shore	15	+	75288945	75289555	75288945	SCAMP5	269.569
6	cg05575921	TC05002795.hg.1	-0.416779	0.256012	0.1039	no	-	5	373378	AHRR	Body	N_Shore	5	-	414939	417808	417808		44.43
7	cg01876548	TC05002600.hg.1	0.312243	0.191964	0.104197	no	-	5	124126863			OpenSea	5	+	124255640	124257291	124255640		128.777
10	cg22132788	TC07002289.hg.1	0.147688	0.091018	0.105038	no	+	7	45002486	MYO1G	Body	Island	7	+	45228588	45232084	45228588		226.102
16	cg17454592	TC15000226.hg.1	0.259272	0.159824	0.105121	no	-	15	33360353	FMN1	TSS1500	OpenSea	15	+	33010175	33026870	33010175	GREM1	-350.178
14	cg13822849	TC09001714.hg.1	0.346003	0.213826	0.105998	no	+	9	137999757	OLFM1	Body	S_Shelf	9	-	138363011	138372564	138372564	PPP1R26-AS1	372.807
17	cg17852385	TC15000687.hg.1	-0.162823	0.100853	0.106795	no	+	15	75019188	CYP1A1	TSS1500	Island	15	+	75182363	75191798	75182363	MPI	163.175
17	cg05549655	TC15000688.hg.1	-0.146065	0.0907599	0.107908	no	+	15	75019143	CYP1A1	TSS1500	Island	15	+	75287876	75313836	75287876	SCAMP5	268.733
1	cg18540492	TC01004375.hg.1	-0.742392	0.461531	0.108085	no	+	1	50489418	AGBL4	Body	Island	1	+	50723329	50723876	50723329		233.911
8	cg05767720	TC06001542.hg.1	0.0545225	0.0339034	0.108166	no	+	6	32117281	PRRT1	Body	N_Shore	6	-	31733367	31745108	31745108	VWA7	-372.173
6	cg17924476	TC05000009.hg.1	-0.0985546	0.0613466	0.108528	no	+	5	323794	AHRR	Body	S_Shore	5	+	612387	667283	612387	CEP72	288.593
18	cg03142697	TC21000142.hg.1	0.084198	0.0524375	0.108713	no	+	21	36258497	RUNX1	Body;Body;Body	N_Shore	21	+	36508935	36511519	36508935		250.438
8	cg05767720	TC06003596.hg.1	0.0893561	0.0557723	0.109489	no	+	6	32117281	PRRT1	Body	N_Shore	6	-	31976197	31980800	31980800	TNXA	-136.481
17	cg17852385	TC15002800.hg.1	0.125438	0.0786158	0.110952	no	+	15	75019188	CYP1A1	TSS1500	Island	15	+	74890843	74901066	74890843	CLK3	-128.345
4	cg18703066	TC02004462.hg.1	-1.99567	1.25097	0.111015	no	-	2	105363536			OpenSea	2	-	105197279	105198348	105198348		-165.188
10	cg12803068	TC07001345.hg.1	-0.108203	0.067854	0.111159	no	+	7	45002919	MYO1G	Body	S_Shore	7	-	44824649	44826939	44826939		-175.98
17	cg17852385	TC15002801.hg.1	0.122066	0.0766685	0.111724	no	+	15	75019188	CYP1A1	TSS1500	Island	15	+	74900713	74922542	74900713	CLK3	-118.475
6	cg17924476	TC05002798.hg.1	-0.311196	0.195579	0.111944	no	+	5	323794	AHRR	Body	S_Shore	5	-	553527	554002	554002		230.208
9	cg07105221	TC07001113.hg.1	0.082383	0.051846	0.112431	no	-	7	4859448	RADIL	Body	S_Shelf	7	-	4931876	4998844	4998844	MMD2	139.396
17	cg05549655	TC15002284.hg.1	-0.292295	0.184056	0.112638	no	+	15	75019143	CYP1A1	TSS1500	Island	15	+	75287876	75313836	75287876	SCAMP5	268.733
17	cg18092474	TC15002284.hg.1	-0.17534	0.110444	0.112749	no	+	15	75019302	CYP1A1	TSS1500	Island	15	+	75287876	75313836	75287876	SCAMP5	268.574
6	cg21161138	TC05002172.hg.1	0.413524	0.261056	0.113553	no	-	5	399360	AHRR	Body	OpenSea	5	+	195893	196449	195893		-203.467
3	cg09935388	TC01000853.hg.1	-0.126443	0.0799537	0.114143	no	-	1	92947588	GFI1	Body;Body;Body	Island	1	+	92764522	92853732	92764522	RPAP2	-183.066
10	cg12803068	TC07001349.hg.1	-0.0732025	0.0463076	0.114296	no	+	7	45002919	MYO1G	Body	S_Shore	7	-	45022627	45026259	45026259	SNORA9;SNHG15	23.34
18	cg00994804	TC21000693.hg.1	-0.0491058	0.0311049	0.114771	no	+	21	36259383	RUNX1	1stExon;1stExon;Body	Island	21	+	36118134	36157166	36118134		-141.249
4	cg18703066	TC02002156.hg.1	-1.65724	1.05353	0.11608	no	-	2	105363536			OpenSea	2	-	104995308	105024790	105024790	LOC100287010	-338.746
10	cg22132788	TC07001345.hg.1	-0.163188	0.10384	0.116428	no	+	7	45002486	MYO1G	Body	Island	7	-	44824649	44826939	44826939		-175.547
17	cg22549041	TC15001647.hg.1	0.0380696	0.0244585	0.11996	no	+	15	75019251	CYP1A1	TSS1500	Island	15	-	75011883	75017951	75017951	CYP1A1	-1.3
17	cg11924019	TC15000687.hg.1	-0.173168	0.111287	0.120067	no	+	15	75019283	CYP1A1	TSS1500	Island	15	+	75182363	75191798	75182363	MPI	163.08
17	cg22549041	TC15001654.hg.1	0.244591	0.157345	0.120437	no	+	15	75019251	CYP1A1	TSS1500	Island	15	-	75275615	75275717	75275717		256.466
10	cg12803068	TC07002922.hg.1	-0.0917927	0.0590902	0.120689	no	+	7	45002919	MYO1G	Body	S_Shore	7	-	44824649	44826939	44826939		-175.98
6	cg21161138	TC05000005.hg.1	-0.110483	0.0711338	0.120752	no	-	5	399360	AHRR	Body	OpenSea	5	+	271736	438406	271736	AHRR;PDCD6	-127.624
10	cg19089201	TC07001353.hg.1	0.179361	0.115667	0.121351	no	+	7	45002287	MYO1G	3'UTR	Island	7	-	45144505	45144641	45144641	SNORA5C	142.354
17	cg17852385	TC15000688.hg.1	-0.113685	0.0734813	0.122203	no	+	15	75019188	CYP1A1	TSS1500	Island	15	+	75287876	75313836	75287876	SCAMP5	268.688
7	cg01876548	TC05002601.hg.1	-0.262913	0.170087	0.122533	no	-	5	124126863			OpenSea	5	+	124298627	124317909	124298627		171.764
16	cg17454592	TC15000229.hg.1	0.0748178	0.0485509	0.123682	no	-	15	33360353	FMN1	TSS1500	OpenSea	15	+	33603163	34158303	33603163	RYR3	242.81
8	cg05767720	TC06003600.hg.1	0.194897	0.127032	0.125341	no	+	6	32117281	PRRT1	Body	N_Shore	6	-	32372815	32374907	32374907	BTNL2	257.626
7	cg01876548	TC05000590.hg.1	0.357519	0.233083	0.125431	no	-	5	124126863			OpenSea	5	+	124065403	124065848	124065403	RP11-436H11.3	-61.46
6	cg21161138	TC05001091.hg.1	-0.784057	0.512223	0.126214	no	-	5	399360	AHRR	Body	OpenSea	5	-	144202	144312	144312		-255.048
17	cg11924019	TC15001650.hg.1	-0.231423	0.151218	0.12629	no	+	15	75019283	CYP1A1	TSS1500	Island	15	-	75136071	75165719	75165719	SCAMP2	146.436
17	cg05549655	TC15000685.hg.1	0.197439	0.129336	0.127239	no	+	15	75019143	CYP1A1	TSS1500	Island	15	+	75074425	75095539	75074425	CSK	55.282
18	cg03142697	TC21000418.hg.1	0.0732779	0.0483536	0.130025	no	+	21	36258497	RUNX1	Body;Body;Body	N_Shore	21	-	35818988	35884573	35884573	KCNE1	-373.924
10	cg22132788	TC07001353.hg.1	0.175433	0.115956	0.130666	no	+	7	45002486	MYO1G	Body	Island	7	-	45144505	45144641	45144641	SNORA5C	142.155
8	cg05767720	TC06001558.hg.1	-0.192976	0.128228	0.132708	no	+	6	32117281	PRRT1	Body	N_Shore	6	-	32046285	32046405	32046405		-70.876
18	cg00994804	TC21000142.hg.1	0.0639214	0.0425246	0.133165	no	+	21	36259383	RUNX1	1stExon;1stExon;Body	Island	21	+	36508935	36511519	36508935		249.552
10	cg19089201	TC07001345.hg.1	-0.155723	0.103601	0.13318	no	+	7	45002287	MYO1G	3'UTR	Island	7	-	44824649	44826939	44826939		-175.348
6	cg23067299	TC05002801.hg.1	0.400543	0.266677	0.133472	no	+	5	323907	AHRR	Body	S_Shore	5	-	710470	767576	767576		443.669
10	cg04180046	TC07000278.hg.1	0.16427	0.109396	0.133568	no	+	7	45002736	MYO1G	Body	Island	7	+	44836235	44864163	44836235	PPIA	-166.501
6	cg21161138	TC05002803.hg.1	-0.412596	0.275721	0.134911	no	-	5	399360	AHRR	Body	OpenSea	5	-	767618	769262	769262		369.902
10	cg12803068	TC07000278.hg.1	0.0962977	0.064505	0.135839	no	+	7	45002919	MYO1G	Body	S_Shore	7	+	44836235	44864163	44836235	PPIA	-166.684
13	cg17199018	TC08001855.hg.1	-0.287398	0.192836	0.136495	no	-	8	28206278	ZNF395	Body	OpenSea	8	+	28621266	28622725	28621266		414.988
8	cg05767720	TC06000387.hg.1	-0.151438	0.101864	0.137471	no	+	6	32117281	PRRT1	Body	N_Shore	6	+	31851538	31851831	31851538		-265.743
13	cg17199018	TC08002265.hg.1	0.145094	0.0976621	0.137735	no	-	8	28206278	ZNF395	Body	OpenSea	8	-	28218501	28260218	28260218	ZNF395	53.94
17	cg12101586	TC15002625.hg.1	-0.100036	0.0674708	0.138535	no	+	15	75019203	CYP1A1	TSS1500	Island	15	-	75515790	75516799	75516799		497.596
10	cg19089201	TC07002285.hg.1	-0.135729	0.0920337	0.14064	no	+	7	45002287	MYO1G	3'UTR	Island	7	+	44924552	44925992	44924552		-77.735
6	cg17924476	TC05002174.hg.1	0.158752	0.10772	0.140919	no	+	5	323794	AHRR	Body	S_Shore	5	+	524820	526709	524820		201.026
7	cg01876548	TC05000597.hg.1	-0.260662	0.177067	0.141358	no	-	5	124126863			OpenSea	5	+	124537581	124538223	124537581		410.718
4	cg18703066	TC02004466.hg.1	0.828106	0.565216	0.143257	no	-	2	105363536			OpenSea	2	-	105481865	105489053	105489053	LINC01159	125.517
17	cg22549041	TC15002625.hg.1	-0.0789086	0.0538591	0.143263	no	+	15	75019251	CYP1A1	TSS1500	Island	15	-	75515790	75516799	75516799		497.548
6	cg11902777	TC05002792.hg.1	0.587678	0.40132	0.143462	no	-	5	368843	AHRR	Body	N_Shore	5	-	26322	37720	37720		-331.123
17	cg05549655	TC15000687.hg.1	-0.182143	0.124616	0.144207	no	+	15	75019143	CYP1A1	TSS1500	Island	15	+	75182363	75191798	75182363	MPI	163.22
6	cg23067299	TC05002796.hg.1	0.410408	0.282081	0.146056	no	+	5	323907	AHRR	Body	S_Shore	5	-	470626	473178	473178	PP7080	149.271
1	cg18540492	TC01002643.hg.1	-0.276651	0.191241	0.148373	no	+	1	50489418	AGBL4	Body	Island	1	-	50883222	50889172	50889172	DMRTA2	399.754
15	cg15507334	TC10002479.hg.1	0.364202	0.25217	0.149028	no	+	10	14372913	FRMD4A	TSS200	OpenSea	10	-	14566482	14569859	14569859		196.946
14	cg13822849	TC09002342.hg.1	0.261297	0.182059	0.151586	no	+	9	137999757	OLFM1	Body	S_Shelf	9	+	138054581	138057152	138054581		54.824
2	cg25189904	TC01002759.hg.1	-0.146721	0.102302	0.151882	no	-	1	68299493	GNG12	TSS1500	S_Shore	1	-	67873493	67896123	67896123	SERBP1	-403.37
5	cg14204430	TC04002149.hg.1	-0.521049	0.364286	0.152988	no	+	4	116035217	NDST4	TSS200	OpenSea	4	+	115602947	115611114	115602947		-432.27
18	cg01664727	TC21000417.hg.1	-0.0833138	0.0583009	0.15336	no	+	21	36258423	RUNX1	Body;Body;Body	N_Shore	21	-	35791013	35796264	35796264	KCNE1	-462.159
4	cg18703066	TC02003461.hg.1	1.62226	1.13914	0.15478	no	-	2	105363536			OpenSea	2	+	105320216	105321967	105320216		-43.32
17	cg26516004	TC15000691.hg.1	-1.23167	0.866158	0.155394	no	+	15	75019376	CYP1A1	TSS1500	S_Shore	15	+	75491233	75504510	75491233	C15orf39	471.857
2	cg25189904	TC01000743.hg.1	0.0979496	0.0690288	0.156273	no	-	1	68299493	GNG12	TSS1500	S_Shore	1	+	67995313	67998012	67995313		-304.18
16	cg17454592	TC15000228.hg.1	0.613603	0.433617	0.157408	no	-	15	33360353	FMN1	TSS1500	OpenSea	15	+	33262928	33262992	33262928		-97.425
8	cg05767720	TC06001549.hg.1	0.0814819	0.0577396	0.15855	no	+	6	32117281	PRRT1	Body	N_Shore	6	-	31830969	31846823	31846823	SLC44A4	-270.458
8	cg05767720	TC06004145.hg.1	-0.0827498	0.0591022	0.161841	no	+	6	32117281	PRRT1	Body	N_Shore	6	-	32116136	32119729	32119729	PRRT1	2.448
8	cg05767720	TC06000396.hg.1	0.201466	0.14394	0.16198	no	+	6	32117281	PRRT1	Body	N_Shore	6	+	32223488	32233615	32223488		106.207
1	cg18540492	TC01002641.hg.1	0.629414	0.449793	0.162072	no	+	1	50489418	AGBL4	Body	Island	1	-	50639978	50641540	50641540		152.122
6	cg23067299	TC05000007.hg.1	-0.359155	0.257194	0.162946	no	+	5	323907	AHRR	Body	S_Shore	5	+	478238	480999	478238	LOC100288152	154.331
6	cg11902777	TC05000004.hg.1	0.31652	0.227073	0.163706	no	-	5	368843	AHRR	Body	N_Shore	5	+	218356	256815	218356	SDHA	-150.487
17	cg18092474	TC15000685.hg.1	0.107852	0.0776269	0.165084	no	+	15	75019302	CYP1A1	TSS1500	Island	15	+	75074425	75095539	75074425	CSK	55.123
17	cg00213123	TC15002625.hg.1	-0.242138	0.174744	0.166209	no	+	15	75019070	CYP1A1	TSS1500	Island	15	-	75515790	75516799	75516799		497.729
16	cg17454592	TC15002470.hg.1	-0.265057	0.192267	0.168382	no	-	15	33360353	FMN1	TSS1500	OpenSea	15	-	33009471	33011208	33011208		-349.145
7	cg01876548	TC05000593.hg.1	0.301573	0.218764	0.168398	no	-	5	124126863			OpenSea	5	+	124165165	124165983	124165165		38.302
8	cg05767720	TC06004075.hg.1	0.192355	0.139697	0.168889	no	+	6	32117281	PRRT1	Body	N_Shore	6	+	31637944	31641553	31637944	LY6G5B	-479.337
6	cg21161138	TC05001098.hg.1	-0.326967	0.237828	0.169552	no	-	5	399360	AHRR	Body	OpenSea	5	-	602735	612325	612325		212.965
18	cg02869559	TC21000420.hg.1	-0.0271807	0.0198914	0.172155	no	+	21	36259067	RUNX1	Body;Body;Body	Island	21	-	35885440	35987441	35987441	RCAN1	-271.626
3	cg09935388	TC01000850.hg.1	-0.119715	0.0877389	0.172787	no	-	1	92947588	GFI1	Body;Body;Body	Island	1	+	92545862	92613401	92545862	BTBD8	-401.726
9	cg07105221	TC07000046.hg.1	0.171436	0.12575	0.173145	no	-	7	4859448	RADIL	Body	S_Shelf	7	+	4941587	4942384	4941587		82.139
17	cg26516004	TC15000690.hg.1	-0.825371	0.605481	0.173189	no	+	15	75019376	CYP1A1	TSS1500	S_Shore	15	+	75315896	75343067	75315896	PPCDC	296.52
1	cg18540492	TC01000613.hg.1	-0.58943	0.433791	0.174572	no	+	1	50489418	AGBL4	Body	Island	1	+	50459990	50461874	50459990		-29.428
18	cg02869559	TC21000693.hg.1	-0.0504725	0.0373035	0.176405	no	+	21	36259067	RUNX1	Body;Body;Body	Island	21	+	36118134	36157166	36118134		-140.933
6	cg23067299	TC05001091.hg.1	1.02652	0.75955	0.176898	no	+	5	323907	AHRR	Body	S_Shore	5	-	144202	144312	144312		-179.595
6	cg23067299	TC05002798.hg.1	-0.681483	0.505365	0.177856	no	+	5	323907	AHRR	Body	S_Shore	5	-	553527	554002	554002		230.095
6	cg11902777	TC05002796.hg.1	-0.351381	0.261123	0.178771	no	-	5	368843	AHRR	Body	N_Shore	5	-	470626	473178	473178	PP7080	104.335
4	cg18703066	TC02002161.hg.1	-0.879867	0.654652	0.179297	no	-	2	105363536			OpenSea	2	-	105363095	105374177	105374177	LINC01114	10.641
10	cg19089201	TC07002289.hg.1	0.12169	0.0908417	0.180737	no	+	7	45002287	MYO1G	3'UTR	Island	7	+	45228588	45232084	45228588		226.301
17	cg18092474	TC15001653.hg.1	-0.0577118	0.0430991	0.180911	no	+	15	75019302	CYP1A1	TSS1500	Island	15	-	75246757	75249805	75249805	RPP25	230.503
17	cg17852385	TC15002285.hg.1	-0.148476	0.110983	0.181309	no	+	15	75019188	CYP1A1	TSS1500	Island	15	+	75288945	75289555	75288945		269.757
17	cg12101586	TC15001653.hg.1	-0.0578443	0.0433868	0.182814	no	+	15	75019203	CYP1A1	TSS1500	Island	15	-	75246757	75249805	75249805	RPP25	230.602
6	cg17924476	TC05000001.hg.1	0.15092	0.113225	0.182913	no	+	5	323794	AHRR	Body	S_Shore	5	+	92266	139978	92266		-231.528
17	cg12101586	TC15002800.hg.1	0.0782195	0.0586878	0.18295	no	+	15	75019203	CYP1A1	TSS1500	Island	15	+	74890843	74901066	74890843	CLK3	-128.36
6	cg11902777	TC05001099.hg.1	-0.241726	0.182146	0.184831	no	-	5	368843	AHRR	Body	N_Shore	5	-	659977	693510	693510	TPPP	324.667
17	cg22549041	TC15002279.hg.1	0.137768	0.104026	0.18574	no	+	15	75019251	CYP1A1	TSS1500	Island	15	+	74646797	74656960	74646797		-372.454
6	cg17924476	TC05001095.hg.1	0.0948559	0.07166	0.185958	no	+	5	323794	AHRR	Body	S_Shore	5	-	466239	473213	473213	PP7080	149.419
15	cg20344448	TC10000109.hg.1	0.210025	0.158874	0.186535	no	+	10	14372431	FRMD4A	5'UTR	OpenSea	10	+	14116283	14129604	14116283		-256.148
10	cg04180046	TC07001352.hg.1	-0.271318	0.205373	0.186822	no	+	7	45002736	MYO1G	Body	Island	7	-	45143948	45144081	45144081	SNORA5A	141.345
17	cg22549041	TC15000687.hg.1	-0.0787348	0.0601017	0.190539	no	+	15	75019251	CYP1A1	TSS1500	Island	15	+	75182363	75191798	75182363	MPI	163.112
10	cg04180046	TC07001345.hg.1	-0.150329	0.115134	0.192008	no	+	7	45002736	MYO1G	Body	Island	7	-	44824649	44826939	44826939		-175.797
8	cg05767720	TC06003594.hg.1	0.132093	0.101324	0.192698	no	+	6	32117281	PRRT1	Body	N_Shore	6	-	31679753	31681842	31681842		-435.439
7	cg01876548	TC05000587.hg.1	0.189162	0.145487	0.193881	no	-	5	124126863			OpenSea	5	+	124052884	124053638	124052884		-73.979
16	cg17454592	TC15002472.hg.1	0.489045	0.376172	0.193932	no	-	15	33360353	FMN1	TSS1500	OpenSea	15	-	33397959	33398437	33398437		38.084
8	cg05767720	TC06004119.hg.1	0.214275	0.166082	0.197337	no	+	6	32117281	PRRT1	Body	N_Shore	6	-	31698358	31707540	31707540	CLIC1	-409.741
10	cg04180046	TC07002285.hg.1	-0.131652	0.102277	0.198369	no	+	7	45002736	MYO1G	Body	Island	7	+	44924552	44925992	44924552		-78.184
18	cg01664727	TC21000692.hg.1	-0.0561685	0.0436538	0.198554	no	+	21	36258423	RUNX1	Body;Body;Body	N_Shore	21	+	36096105	36109479	36096105		-162.318
12	cg11207515	TC07001987.hg.1	-0.269275	0.209319	0.198638	no	-	7	146904205	CNTNAP2	Body	OpenSea	7	-	146593689	146593785	146593785		-310.42
17	cg11924019	TC15001647.hg.1	0.0581496	0.0453276	0.199884	no	+	15	75019283	CYP1A1	TSS1500	Island	15	-	75011883	75017951	75017951	CYP1A1	-1.332
17	cg13570656	TC15001647.hg.1	0.034101	0.0266725	0.201418	no	+	15	75019196	CYP1A1	TSS1500	Island	15	-	75011883	75017951	75017951	CYP1A1	-1.245
8	cg05767720	TC06001551.hg.1	-0.122054	0.095658	0.202321	no	+	6	32117281	PRRT1	Body	N_Shore	6	-	31867384	31869769	31869769	ZBTB12	-247.512
10	cg04180046	TC07001349.hg.1	-0.0999733	0.0785762	0.203608	no	+	7	45002736	MYO1G	Body	Island	7	-	45022627	45026259	45026259	SNORA9;SNHG15	23.523
10	cg12803068	TC07002285.hg.1	-0.0766759	0.0603076	0.203927	no	+	7	45002919	MYO1G	Body	S_Shore	7	+	44924552	44925992	44924552		-78.367
18	cg02869559	TC21000139.hg.1	-0.0417685	0.0329311	0.205015	no	+	21	36259067	RUNX1	Body;Body;Body	Island	21	+	36096105	36109479	36096105	LINC00160	-162.962
17	cg00213123	TC15001649.hg.1	0.13891	0.10971	0.205802	no	+	15	75019070	CYP1A1	TSS1500	Island	15	-	75128459	75135552	75135552	ULK3	116.482
8	cg05767720	TC06001545.hg.1	0.0789101	0.0624434	0.206679	no	+	6	32117281	PRRT1	Body	N_Shore	6	-	31765169	31774761	31774761	LSM2	-342.52
7	cg01876548	TC05001727.hg.1	0.17634	0.140128	0.208583	no	-	5	124126863			OpenSea	5	-	123641923	123740772	123740772		-386.091
6	cg17924476	TC05002794.hg.1	-0.184234	0.146621	0.209265	no	+	5	323794	AHRR	Body	S_Shore	5	-	269973	271631	271631		-52.163
10	cg19089201	TC07002286.hg.1	0.115538	0.0921952	0.210479	no	+	7	45002287	MYO1G	3'UTR	Island	7	+	45022562	45023645	45022562		20.275
17	cg12101586	TC15001650.hg.1	-0.128214	0.102314	0.210495	no	+	15	75019203	CYP1A1	TSS1500	Island	15	-	75136071	75165719	75165719	SCAMP2	146.516
6	cg17924476	TC05002802.hg.1	0.253826	0.20257	0.210538	no	+	5	323794	AHRR	Body	S_Shore	5	-	763495	764229	764229		440.435
17	cg22549041	TC15000685.hg.1	0.0781429	0.0623906	0.210737	no	+	15	75019251	CYP1A1	TSS1500	Island	15	+	75074425	75095539	75074425	CSK	55.174
17	cg12101586	TC15001652.hg.1	0.150716	0.120542	0.211522	no	+	15	75019203	CYP1A1	TSS1500	Island	15	-	75212132	75230509	75230509	COX5A	211.306
10	cg22132788	TC07000281.hg.1	0.0824474	0.0660089	0.211994	no	+	7	45002486	MYO1G	Body	Island	7	+	45197367	45225901	45197367	RAMP3	194.881
7	cg01876548	TC05000583.hg.1	-0.190364	0.152457	0.212137	no	-	5	124126863			OpenSea	5	+	123791066	123795791	123791066		-335.797
17	cg26516004	TC15001653.hg.1	-0.3842	0.308117	0.212765	no	+	15	75019376	CYP1A1	TSS1500	S_Shore	15	-	75246757	75249805	75249805	RPP25	230.429
17	cg00213123	TC15001642.hg.1	0.0925294	0.074233	0.212932	no	+	15	75019070	CYP1A1	TSS1500	Island	15	-	74630100	74660081	74660081	CYP11A1	-358.989
14	cg13822849	TC09000799.hg.1	0.0724054	0.0581418	0.213354	no	+	9	137999757	OLFM1	Body	S_Shelf	9	+	138453602	138458801	138453602	PAEP	453.845
10	cg19089201	TC07000278.hg.1	0.122272	0.0985107	0.21487	no	+	7	45002287	MYO1G	3'UTR	Island	7	+	44836235	44864163	44836235	PPIA	-166.052
15	cg20344448	TC10001054.hg.1	0.16774	0.135661	0.216624	no	+	10	14372431	FRMD4A	5'UTR	OpenSea	10	-	14560556	14816896	14816896	FAM107B	444.465
10	cg04180046	TC07000280.hg.1	0.111948	0.0906998	0.217442	no	+	7	45002736	MYO1G	Body	Island	7	+	45039074	45116069	45039074	CCM2	36.338
17	cg13570656	TC15001644.hg.1	0.0988764	0.08015	0.217675	no	+	15	75019196	CYP1A1	TSS1500	Island	15	-	74738318	74753529	74753529	UBL7	-265.667
2	cg25189904	TC01002761.hg.1	0.181932	0.14781	0.218717	no	-	1	68299493	GNG12	TSS1500	S_Shore	1	-	68238276	68238336	68238336		-61.157
17	cg26516004	TC15002801.hg.1	0.499833	0.406463	0.219143	no	+	15	75019376	CYP1A1	TSS1500	S_Shore	15	+	74900713	74922542	74900713	CLK3	-118.663
18	cg03142697	TC21000945.hg.1	0.105411	0.0860018	0.220657	no	+	21	36258497	RUNX1	Body;Body;Body	N_Shore	21	-	36314114	36317337	36317337		58.84
17	cg26516004	TC15002284.hg.1	-0.966605	0.789929	0.221417	no	+	15	75019376	CYP1A1	TSS1500	S_Shore	15	+	75287876	75313836	75287876	SCAMP5	268.5
4	cg18703066	TC02000633.hg.1	-1.37678	1.12872	0.222889	no	-	2	105363536			OpenSea	2	+	105027659	105032070	105027659		-335.877
9	cg05767720	TC06004146.hg.1	0.0590166	0.0484093	0.223135	no	-	6	32117281	PRRT1	Body	N_Shore	6	-	32119758	32122142	32122142	PRRT1	4.861
8	cg05767720	TC06001538.hg.1	-0.110148	0.0907855	0.225359	no	+	6	32117281	PRRT1	Body	N_Shore	6	-	31686425	31689622	31689622	LY6G6C	-427.659
8	cg05767720	TC06001533.hg.1	0.151562	0.12502	0.22573	no	+	6	32117281	PRRT1	Body	N_Shore	6	-	31626075	31628549	31628549	C6orf47	-488.732
8	cg05767720	TC06004124.hg.1	0.195166	0.161144	0.22618	no	+	6	32117281	PRRT1	Body	N_Shore	6	-	32520490	32527779	32527779	HLA-DRB6	410.498
17	cg13570656	TC15001652.hg.1	0.126361	0.104889	0.228648	no	+	15	75019196	CYP1A1	TSS1500	Island	15	-	75212132	75230509	75230509	COX5A	211.313
17	cg17852385	TC15001654.hg.1	0.316538	0.264319	0.23142	no	+	15	75019188	CYP1A1	TSS1500	Island	15	-	75275615	75275717	75275717		256.529
17	cg00213123	TC15000680.hg.1	-0.277812	0.2324	0.23226	no	+	15	75019070	CYP1A1	TSS1500	Island	15	+	74646797	74656961	74646797	LOC729739	-372.273
18	cg02869559	TC21000694.hg.1	0.0756199	0.0635369	0.234308	no	+	21	36259067	RUNX1	Body;Body;Body	Island	21	+	36299506	36301769	36299506		40.439
8	cg05767720	TC06001565.hg.1	-0.0671897	0.0564633	0.234388	no	+	6	32117281	PRRT1	Body	N_Shore	6	-	32256303	32352332	32352332	C6orf10	235.051
17	cg22549041	TC15000688.hg.1	-0.051901	0.0437926	0.236285	no	+	15	75019251	CYP1A1	TSS1500	Island	15	+	75287876	75313836	75287876	SCAMP5	268.625
17	cg18092474	TC15002800.hg.1	0.0690837	0.0583119	0.236454	no	+	15	75019302	CYP1A1	TSS1500	Island	15	+	74890843	74901066	74890843	CLK3	-128.459
4	cg18703066	TC02002160.hg.1	-1.47581	1.24638	0.236712	no	-	2	105363536			OpenSea	2	-	105197279	105198348	105198348	LOC105373524	-165.188
14	cg13822849	TC09000791.hg.1	-0.253351	0.214084	0.236972	no	+	9	137999757	OLFM1	Body	S_Shelf	9	+	138073455	138079152	138073455	LOC401557	73.698
17	cg13570656	TC15002281.hg.1	0.0735567	0.0622625	0.237774	no	+	15	75019196	CYP1A1	TSS1500	Island	15	+	74753606	74773633	74753606	UBL7-AS1	-265.59
10	cg22132788	TC07001340.hg.1	0.064444	0.0545549	0.237824	no	+	7	45002486	MYO1G	Body	Island	7	-	44421965	44530479	44530479	NUDCD3	-472.007
17	cg22549041	TC15001650.hg.1	-0.0964476	0.0816787	0.238003	no	+	15	75019251	CYP1A1	TSS1500	Island	15	-	75136071	75165719	75165719	SCAMP2	146.468
18	cg03142697	TC21000693.hg.1	-0.0453173	0.0383875	0.238121	no	+	21	36258497	RUNX1	Body;Body;Body	N_Shore	21	+	36118134	36157166	36118134		-140.363
17	cg05549655	TC15002279.hg.1	0.254679	0.215789	0.238239	no	+	15	75019143	CYP1A1	TSS1500	Island	15	+	74646797	74656960	74646797		-372.346
6	cg05575921	TC05002794.hg.1	0.332502	0.281927	0.23857	no	-	5	373378	AHRR	Body	N_Shore	5	-	269973	271631	271631		-101.747
15	cg11813497	TC10000109.hg.1	0.162383	0.137907	0.239328	no	+	10	14372879	FRMD4A	TSS200	OpenSea	10	+	14116283	14129604	14116283		-256.596
6	cg23067299	TC05000006.hg.1	0.243051	0.207081	0.240841	no	+	5	323907	AHRR	Body	S_Shore	5	+	443273	472052	443273	EXOC3	119.366
17	cg18092474	TC15002279.hg.1	0.151842	0.129486	0.241262	no	+	15	75019302	CYP1A1	TSS1500	Island	15	+	74646797	74656960	74646797		-372.505
16	cg17454592	TC15001186.hg.1	-0.220751	0.18885	0.24276	no	-	15	33360353	FMN1	TSS1500	OpenSea	15	-	33595858	33602860	33602860	LOC101928134	242.507
17	cg00213123	TC15001656.hg.1	-0.214283	0.183835	0.244091	no	+	15	75019070	CYP1A1	TSS1500	Island	15	-	75413877	75414007	75414007		394.937
17	cg18092474	TC15002625.hg.1	-0.0781266	0.0670569	0.244312	no	+	15	75019302	CYP1A1	TSS1500	Island	15	-	75515790	75516799	75516799		497.497
17	cg12101586	TC15002801.hg.1	0.0663873	0.0572482	0.246519	no	+	15	75019203	CYP1A1	TSS1500	Island	15	+	74900713	74922542	74900713	CLK3	-118.49
15	cg20344448	TC10001913.hg.1	0.185417	0.160712	0.248938	no	+	10	14372431	FRMD4A	5'UTR	OpenSea	10	+	14116287	14129880	14116287	LOC101928453	-256.144
8	cg05767720	TC06004121.hg.1	-0.122651	0.106349	0.249114	no	+	6	32117281	PRRT1	Body	N_Shore	6	-	32083041	32096030	32096030	ATF6B	-21.251
8	cg05767720	TC06001559.hg.1	0.162125	0.140978	0.250465	no	+	6	32117281	PRRT1	Body	N_Shore	6	-	32096484	32098068	32098068	FKBPL	-19.213
9	cg07105221	TC07001110.hg.1	0.0326623	0.0284254	0.250854	no	-	7	4859448	RADIL	Body	S_Shelf	7	-	4834285	4923350	4923350	RADIL	63.902
17	cg22549041	TC15002800.hg.1	0.053786	0.0468591	0.251362	no	+	15	75019251	CYP1A1	TSS1500	Island	15	+	74890843	74901066	74890843	CLK3	-128.408
17	cg13570656	TC15002801.hg.1	0.0568276	0.0498124	0.254259	no	+	15	75019196	CYP1A1	TSS1500	Island	15	+	74900713	74922542	74900713	CLK3	-118.483
6	cg05575921	TC05001091.hg.1	-0.642992	0.565566	0.255899	no	-	5	373378	AHRR	Body	N_Shore	5	-	144202	144312	144312		-229.066
18	cg00994804	TC21000941.hg.1	-0.0725918	0.0639564	0.256684	no	+	21	36259383	RUNX1	1stExon;1stExon;Body	Island	21	-	35949774	35950546	35950546		-308.837
6	cg17924476	TC05002792.hg.1	-0.190381	0.167962	0.257334	no	+	5	323794	AHRR	Body	S_Shore	5	-	26322	37720	37720		-286.074
17	cg22549041	TC15002285.hg.1	-0.0749146	0.0661239	0.257555	no	+	15	75019251	CYP1A1	TSS1500	Island	15	+	75288945	75289555	75288945		269.694
17	cg11924019	TC15000684.hg.1	0.0815878	0.072055	0.257826	no	+	15	75019283	CYP1A1	TSS1500	Island	15	+	75041184	75048941	75041184	CYP1A2	21.901
17	cg05549655	TC15001654.hg.1	0.368354	0.326539	0.259613	no	+	15	75019143	CYP1A1	TSS1500	Island	15	-	75275615	75275717	75275717		256.574
8	cg05767720	TC06000398.hg.1	-0.186382	0.165574	0.260619	no	+	6	32117281	PRRT1	Body	N_Shore	6	+	32358287	32361468	32358287	HCG23	241.006
8	cg05767720	TC06000399.hg.1	0.238348	0.212438	0.262192	no	+	6	32117281	PRRT1	Body	N_Shore	6	+	32407619	32412826	32407619	HLA-DRA	290.338
17	cg12101586	TC15000687.hg.1	-0.0844665	0.0753135	0.262376	no	+	15	75019203	CYP1A1	TSS1500	Island	15	+	75182363	75191798	75182363	MPI	163.16
6	cg05575921	TC05000008.hg.1	-0.24776	0.222251	0.265261	no	-	5	373378	AHRR	Body	N_Shore	5	+	524820	526709	524820		151.442
8	cg05767720	TC06001561.hg.1	-0.118019	0.105911	0.265454	no	+	6	32117281	PRRT1	Body	N_Shore	6	-	32135983	32145888	32145888	AGPAT1	28.607
17	cg22549041	TC15001653.hg.1	-0.0384985	0.0346438	0.266765	no	+	15	75019251	CYP1A1	TSS1500	Island	15	-	75246757	75249805	75249805	RPP25	230.554
6	cg11902777	TC05000003.hg.1	-0.334089	0.301422	0.268011	no	-	5	368843	AHRR	Body	N_Shore	5	+	191626	195468	191626	LRRC14B	-177.217
8	cg05767720	TC06000379.hg.1	0.214009	0.193103	0.26806	no	+	6	32117281	PRRT1	Body	N_Shore	6	+	31631065	31631178	31631065		-486.216
17	cg00213123	TC15001646.hg.1	0.210328	0.189856	0.268248	no	+	15	75019070	CYP1A1	TSS1500	Island	15	-	74922899	74988386	74988386	EDC3	-30.684
17	cg11924019	TC15002801.hg.1	0.0937408	0.084656	0.268469	no	+	15	75019283	CYP1A1	TSS1500	Island	15	+	74900713	74922542	74900713	CLK3	-118.57
6	cg17924476	TC05000007.hg.1	-0.109722	0.0996198	0.271029	no	+	5	323794	AHRR	Body	S_Shore	5	+	478238	480999	478238	LOC100288152	154.444
17	cg12101586	TC15000685.hg.1	0.085862	0.0781773	0.272383	no	+	15	75019203	CYP1A1	TSS1500	Island	15	+	75074425	75095539	75074425	CSK	55.222
17	cg12101586	TC15001644.hg.1	0.101038	0.092134	0.273107	no	+	15	75019203	CYP1A1	TSS1500	Island	15	-	74738318	74753529	74753529	UBL7	-265.674
8	cg05767720	TC06003601.hg.1	0.184865	0.169104	0.274612	no	+	6	32117281	PRRT1	Body	N_Shore	6	-	32520490	32527779	32527779	HLA-DRB6	410.498
8	cg05767720	TC06001550.hg.1	-0.0587005	0.0537952	0.275499	no	+	6	32117281	PRRT1	Body	N_Shore	6	-	31847536	31865464	31865464	EHMT2	-251.817
17	cg12101586	TC15002280.hg.1	-0.0800103	0.0738217	0.278744	no	+	15	75019203	CYP1A1	TSS1500	Island	15	+	74683013	74685651	74683013		-336.19
13	cg17199018	TC08000223.hg.1	-0.14143	0.131469	0.282335	no	-	8	28206278	ZNF395	Body	OpenSea	8	+	28655659	28656986	28655659		449.381
17	cg26516004	TC15002280.hg.1	-0.563693	0.524192	0.282519	no	+	15	75019376	CYP1A1	TSS1500	S_Shore	15	+	74683013	74685651	74683013		-336.363
13	cg17199018	TC08002614.hg.1	0.0605015	0.0562896	0.282755	no	-	8	28206278	ZNF395	Body	OpenSea	8	-	28203102	28260218	28260218	ZNF395	53.94
17	cg12101586	TC15000682.hg.1	0.0551271	0.0513139	0.282986	no	+	15	75019203	CYP1A1	TSS1500	Island	15	+	74833518	74890472	74833518	ARID3B	-185.685
6	cg17924476	TC05002176.hg.1	0.0699587	0.0653881	0.284966	no	+	5	323794	AHRR	Body	S_Shore	5	+	693675	785956	693675		369.881
7	cg01876548	TC05002597.hg.1	-0.186361	0.174193	0.284986	no	-	5	124126863			OpenSea	5	+	123731296	123736088	123731296		-395.567
17	cg18092474	TC15000684.hg.1	0.0517393	0.0484114	0.285488	no	+	15	75019302	CYP1A1	TSS1500	Island	15	+	75041184	75048941	75041184	CYP1A2	21.882
17	cg18092474	TC15001647.hg.1	0.0323871	0.0304609	0.287974	no	+	15	75019302	CYP1A1	TSS1500	Island	15	-	75011883	75017951	75017951	CYP1A1	-1.351
9	cg07105221	TC07001111.hg.1	0.19865	0.187366	0.289341	no	-	7	4859448	RADIL	Body	S_Shelf	7	-	4850819	4850920	4850920		-8.528
12	cg25949550	TC07003223.hg.1	0.388169	0.367105	0.290637	no	-	7	145814306	CNTNAP2	Body	S_Shore	7	-	146113435	146113645	146113645		299.339
18	cg00994804	TC21000415.hg.1	-0.0497394	0.0471388	0.291645	no	+	21	36259383	RUNX1	1stExon;1stExon;Body	Island	21	-	35772615	35773370	35773370	C21orf140	-486.013
8	cg05767720	TC06000382.hg.1	-0.406337	0.38571	0.292419	no	+	6	32117281	PRRT1	Body	N_Shore	6	+	31686371	31694491	31686371	C6orf25	-430.91
8	cg05767720	TC06000378.hg.1	-0.133579	0.127024	0.293276	no	+	6	32117281	PRRT1	Body	N_Shore	6	+	31626106	31628498	31626106		-491.175
17	cg26516004	TC15000685.hg.1	0.583604	0.555147	0.293436	no	+	15	75019376	CYP1A1	TSS1500	S_Shore	15	+	75074425	75095539	75074425	CSK	55.049
6	cg21161138	TC05002171.hg.1	0.176696	0.168347	0.294203	no	-	5	399360	AHRR	Body	OpenSea	5	+	92264	139978	92264		-307.096
17	cg05549655	TC15001647.hg.1	0.0531338	0.0507645	0.295546	no	+	15	75019143	CYP1A1	TSS1500	Island	15	-	75011883	75017951	75017951	CYP1A1	-1.192
17	cg11924019	TC15002625.hg.1	-0.104274	0.0998302	0.296544	no	+	15	75019283	CYP1A1	TSS1500	Island	15	-	75515790	75516799	75516799		497.516
17	cg05549655	TC15002285.hg.1	-0.143236	0.137152	0.296611	no	+	15	75019143	CYP1A1	TSS1500	Island	15	+	75288945	75289555	75288945		269.802
10	cg22132788	TC07002285.hg.1	-0.0963589	0.0923157	0.296874	no	+	7	45002486	MYO1G	Body	Island	7	+	44924552	44925992	44924552		-77.934
10	cg19089201	TC07001352.hg.1	-0.19294	0.184931	0.297101	no	+	7	45002287	MYO1G	3'UTR	Island	7	-	45143948	45144081	45144081	SNORA5A	141.794
10	cg04180046	TC07002288.hg.1	0.148639	0.142471	0.297106	no	+	7	45002736	MYO1G	Body	Island	7	+	45039345	45116069	45039345	CCM2	36.609
6	cg21161138	TC05000007.hg.1	-0.180635	0.173586	0.29835	no	-	5	399360	AHRR	Body	OpenSea	5	+	478238	480999	478238	LOC100288152	78.878
3	cg14179389	TC01000854.hg.1	0.0733923	0.0705458	0.298472	no	-	1	92947961	GFI1	Body;Body;Body	Island	1	+	93297594	93307481	93297594	RPL5;SNORD21;SNORA66	349.633
17	cg22549041	TC15000681.hg.1	-0.0552311	0.0531389	0.298925	no	+	15	75019251	CYP1A1	TSS1500	Island	15	+	74753606	74773633	74753606	UBL7-AS1	-265.645
17	cg11924019	TC15000681.hg.1	-0.102266	0.0984348	0.299134	no	+	15	75019283	CYP1A1	TSS1500	Island	15	+	74753606	74773633	74753606	UBL7-AS1	-265.677
17	cg26516004	TC15001644.hg.1	0.679331	0.654265	0.299418	no	+	15	75019376	CYP1A1	TSS1500	S_Shore	15	-	74738318	74753529	74753529	UBL7	-265.847
8	cg05767720	TC06001548.hg.1	-0.0826202	0.0795738	0.299431	no	+	6	32117281	PRRT1	Body	N_Shore	6	-	31825436	31830709	31830709	NEU1	-286.572
6	cg21161138	TC05001094.hg.1	0.327501	0.315554	0.299628	no	-	5	399360	AHRR	Body	OpenSea	5	-	441613	443275	443275	EXOC3-AS1	43.915
14	cg13822849	TC09000796.hg.1	0.0970293	0.0938349	0.301408	no	+	9	137999757	OLFM1	Body	S_Shelf	9	+	138391830	138396519	138391830	MRPS2	392.073
14	cg13822849	TC09000798.hg.1	0.117341	0.113864	0.303051	no	+	9	137999757	OLFM1	Body	S_Shelf	9	+	138437985	138441815	138437985	OBP2A	438.228
14	cg13822849	TC09002344.hg.1	0.167822	0.162858	0.303075	no	+	9	137999757	OLFM1	Body	S_Shelf	9	+	138307020	138307423	138307020		307.263
6	cg21161138	TC05001095.hg.1	0.12851	0.124907	0.303845	no	-	5	399360	AHRR	Body	OpenSea	5	-	466239	473213	473213	PP7080	73.853
17	cg13570656	TC15000689.hg.1	0.063542	0.0618347	0.304423	no	+	15	75019196	CYP1A1	TSS1500	Island	15	+	75288945	75289555	75288945	SCAMP5	269.749
6	cg21161138	TC05002176.hg.1	0.117	0.113935	0.304756	no	-	5	399360	AHRR	Body	OpenSea	5	+	693675	785956	693675		294.315
17	cg12101586	TC15002279.hg.1	0.133633	0.130374	0.305657	no	+	15	75019203	CYP1A1	TSS1500	Island	15	+	74646797	74656960	74646797		-372.406
10	cg22132788	TC07000278.hg.1	0.101192	0.0987784	0.305921	no	+	7	45002486	MYO1G	Body	Island	7	+	44836235	44864163	44836235	PPIA	-166.251
18	cg02869559	TC21000941.hg.1	-0.0784656	0.0766829	0.30648	no	+	21	36259067	RUNX1	Body;Body;Body	Island	21	-	35949774	35950546	35950546		-308.521
17	cg18092474	TC15001651.hg.1	-0.0554039	0.0541669	0.306674	no	+	15	75019302	CYP1A1	TSS1500	Island	15	-	75192328	75199462	75199462	FAM219B	180.16
17	cg00213123	TC15000688.hg.1	-0.144637	0.142096	0.309021	no	+	15	75019070	CYP1A1	TSS1500	Island	15	+	75287876	75313836	75287876	SCAMP5	268.806
4	cg18703066	TC02002162.hg.1	0.812905	0.801019	0.310469	no	-	2	105363536			OpenSea	2	-	105421883	105469641	105469641	LINC01158	106.105
9	cg07105221	TC07002766.hg.1	-0.112169	0.110696	0.311197	no	-	7	4859448	RADIL	Body	S_Shelf	7	-	4645446	4646569	4646569		-212.879
18	cg03142697	TC21000694.hg.1	0.0662042	0.0653815	0.311545	no	+	21	36258497	RUNX1	Body;Body;Body	N_Shore	21	+	36299506	36301769	36299506		41.009
6	cg23067299	TC05002797.hg.1	-0.204567	0.202117	0.311764	no	+	5	323907	AHRR	Body	S_Shore	5	-	477487	483482	483482	SLC9A3	159.575
6	cg05575921	TC05002798.hg.1	0.380762	0.376356	0.311963	no	-	5	373378	AHRR	Body	N_Shore	5	-	553527	554002	554002		180.624
2	cg25189904	TC01000744.hg.1	-0.181099	0.179317	0.312812	no	-	1	68299493	GNG12	TSS1500	S_Shore	1	+	68006810	68006916	68006810		-292.683
17	cg12101586	TC15000688.hg.1	-0.0553163	0.0548743	0.313713	no	+	15	75019203	CYP1A1	TSS1500	Island	15	+	75287876	75313836	75287876	SCAMP5	268.673
17	cg00213123	TC15002284.hg.1	-0.290354	0.288154	0.313915	no	+	15	75019070	CYP1A1	TSS1500	Island	15	+	75287876	75313836	75287876	SCAMP5	268.806
17	cg26516004	TC15000688.hg.1	-0.392612	0.389647	0.313926	no	+	15	75019376	CYP1A1	TSS1500	S_Shore	15	+	75287876	75313836	75287876	SCAMP5	268.5
8	cg05767720	TC06004049.hg.1	-0.0811419	0.0807961	0.315528	no	+	6	32117281	PRRT1	Body	N_Shore	6	-	32148745	32152101	32152101	AGER	34.82
18	cg03142697	TC21000139.hg.1	-0.0339888	0.0338913	0.316204	no	+	21	36258497	RUNX1	Body;Body;Body	N_Shore	21	+	36096105	36109479	36096105	LINC00160	-162.392
10	cg12803068	TC07002923.hg.1	0.120205	0.120025	0.316869	no	+	7	45002919	MYO1G	Body	S_Shore	7	-	44915900	44918584	44918584	PURB	-84.335
17	cg26516004	TC15002283.hg.1	0.876204	0.878391	0.318799	no	+	15	75019376	CYP1A1	TSS1500	S_Shore	15	+	74800497	74806312	74800497		-218.879
14	cg13822849	TC09002850.hg.1	0.226047	0.227224	0.320106	no	+	9	137999757	OLFM1	Body	S_Shelf	9	-	138469277	138472027	138472027		472.27
18	cg01664727	TC21000944.hg.1	-0.111368	0.112079	0.320671	no	+	21	36258423	RUNX1	Body;Body;Body	N_Shore	21	-	36195761	36198703	36198703		-59.72
8	cg05767720	TC06001553.hg.1	-0.0509604	0.0514248	0.32198	no	+	6	32117281	PRRT1	Body	N_Shore	6	-	31937587	31940221	31940221	DXO	-177.06
18	cg03142697	TC21000944.hg.1	-0.0898884	0.0908074	0.322513	no	+	21	36258497	RUNX1	Body;Body;Body	N_Shore	21	-	36195761	36198703	36198703		-59.794
8	cg05767720	TC06003598.hg.1	0.0666823	0.0674546	0.323162	no	+	6	32117281	PRRT1	Body	N_Shore	6	-	32120579	32122142	32122142	LOC100507547	4.861
17	cg12101586	TC15002281.hg.1	0.0707302	0.0715762	0.323343	no	+	15	75019203	CYP1A1	TSS1500	Island	15	+	74753606	74773633	74753606	UBL7-AS1	-265.597
15	cg20344448	TC10002479.hg.1	0.270726	0.274738	0.324709	no	+	10	14372431	FRMD4A	5'UTR	OpenSea	10	-	14566482	14569859	14569859		197.428
6	cg11902777	TC05003403.hg.1	-0.126774	0.128749	0.32507	no	-	5	368843	AHRR	Body	N_Shore	5	-	795720	851101	851101	ZDHHC11	482.258
17	cg13570656	TC15001651.hg.1	-0.0465368	0.0474466	0.326956	no	+	15	75019196	CYP1A1	TSS1500	Island	15	-	75192328	75199462	75199462	FAM219B	180.266
18	cg00994804	TC21000140.hg.1	-0.0262667	0.0268171	0.327622	no	+	21	36259383	RUNX1	1stExon;1stExon;Body	Island	21	+	36118054	36157183	36118054	LINC01426	-141.329
14	cg13822849	TC09000800.hg.1	0.0941136	0.0964056	0.329228	no	+	9	137999757	OLFM1	Body	S_Shelf	9	+	138466771	138478958	138466771	LINC01502	467.014
15	cg11813497	TC10001055.hg.1	-0.194112	0.198989	0.329593	no	+	10	14372879	FRMD4A	TSS200	OpenSea	10	-	14705394	14705493	14705493		332.614
8	cg05767720	TC06000381.hg.1	-0.121555	0.124745	0.330119	no	+	6	32117281	PRRT1	Body	N_Shore	6	+	31674640	31685695	31674640	LY6G6F;LY6G6D	-442.641
17	cg17852385	TC15001647.hg.1	0.0397578	0.0410992	0.333636	no	+	15	75019188	CYP1A1	TSS1500	Island	15	-	75011883	75017951	75017951	CYP1A1	-1.237
18	cg01664727	TC21000940.hg.1	0.0591745	0.0611721	0.333644	no	+	21	36258423	RUNX1	Body;Body;Body	N_Shore	21	-	35821672	35831893	35831893	KCNE1	-426.53
14	cg13822849	TC09000793.hg.1	0.194628	0.201214	0.333684	no	+	9	137999757	OLFM1	Body	S_Shelf	9	+	138244530	138246066	138244530		244.773
6	cg17924476	TC05002796.hg.1	0.105376	0.109288	0.335217	no	+	5	323794	AHRR	Body	S_Shore	5	-	470626	473178	473178	PP7080	149.384
8	cg05767720	TC06004077.hg.1	0.036748	0.0382234	0.336622	no	+	6	32117281	PRRT1	Body	N_Shore	6	+	31913486	31919861	31913486	CFB	-203.795
16	cg17454592	TC15001182.hg.1	-0.143507	0.149408	0.337071	no	-	15	33360353	FMN1	TSS1500	OpenSea	15	-	33009471	33011208	33011208	LOC100131315	-349.145
17	cg05549655	TC15001651.hg.1	-0.0866993	0.0902763	0.337137	no	+	15	75019143	CYP1A1	TSS1500	Island	15	-	75192328	75199462	75199462	FAM219B	180.319
10	cg04180046	TC07001343.hg.1	-0.0878035	0.0916036	0.338073	no	+	7	45002736	MYO1G	Body	Island	7	-	44605016	44614650	44614650	DDX56	-388.086
8	cg05767720	TC06002718.hg.1	0.101918	0.106598	0.339295	no	+	6	32117281	PRRT1	Body	N_Shore	6	+	31789991	31795104	31789991		-327.29
6	cg23067299	TC05002174.hg.1	0.26601	0.278432	0.339652	no	+	5	323907	AHRR	Body	S_Shore	5	+	524820	526709	524820		200.913
10	cg12803068	TC07001340.hg.1	0.0340398	0.0356604	0.340072	no	+	7	45002919	MYO1G	Body	S_Shore	7	-	44421965	44530479	44530479	NUDCD3	-472.44
17	cg05549655	TC15002801.hg.1	0.090473	0.0947971	0.340158	no	+	15	75019143	CYP1A1	TSS1500	Island	15	+	74900713	74922542	74900713	CLK3	-118.43
10	cg19089201	TC07001350.hg.1	-0.0477254	0.0500185	0.340274	no	+	7	45002287	MYO1G	3'UTR	Island	7	-	45120036	45128513	45128513	NACAD	126.226
10	cg12803068	TC07002925.hg.1	-0.0440746	0.0462089	0.340449	no	+	7	45002919	MYO1G	Body	S_Shore	7	-	45022627	45026259	45026259		23.34
17	cg05549655	TC15002281.hg.1	0.112929	0.118497	0.340855	no	+	15	75019143	CYP1A1	TSS1500	Island	15	+	74753606	74773633	74753606	UBL7-AS1	-265.537
6	cg17924476	TC05002171.hg.1	0.0919849	0.0966319	0.341411	no	+	5	323794	AHRR	Body	S_Shore	5	+	92264	139978	92264		-231.53
9	cg07105221	TC07001114.hg.1	0.110397	0.116011	0.341565	no	-	7	4859448	RADIL	Body	S_Shelf	7	-	4936899	4938473	4938473		79.025
11	cg04598670	TC07002394.hg.1	0.132419	0.139286	0.342025	no	-	7	68697651			OpenSea	7	+	69054796	69063004	69054796		357.145
17	cg26516004	TC15000680.hg.1	-0.605486	0.637462	0.342463	no	+	15	75019376	CYP1A1	TSS1500	S_Shore	15	+	74646797	74656961	74646797	LOC729739	-372.579
6	cg17924476	TC05001093.hg.1	-0.13884	0.146902	0.344865	no	+	5	323794	AHRR	Body	S_Shore	5	-	269973	271631	271631		-52.163
6	cg17924476	TC05000003.hg.1	0.118961	0.126114	0.345805	no	+	5	323794	AHRR	Body	S_Shore	5	+	191626	195468	191626	LRRC14B	-132.168
14	cg13822849	TC09000789.hg.1	0.23599	0.250183	0.345809	no	+	9	137999757	OLFM1	Body	S_Shelf	9	+	137828997	137835041	137828997		-170.76
17	cg22549041	TC15002281.hg.1	0.0538863	0.0571374	0.345895	no	+	15	75019251	CYP1A1	TSS1500	Island	15	+	74753606	74773633	74753606	UBL7-AS1	-265.645
10	cg22132788	TC07001349.hg.1	-0.0668121	0.0709301	0.346488	no	+	7	45002486	MYO1G	Body	Island	7	-	45022627	45026259	45026259	SNORA9;SNHG15	23.773
11	cg04598670	TC07003007.hg.1	-0.122843	0.130482	0.346738	no	-	7	68697651			OpenSea	7	-	68747971	68769122	68769122		71.471
6	cg17924476	TC05002803.hg.1	0.14901	0.158371	0.347025	no	+	5	323794	AHRR	Body	S_Shore	5	-	767618	769262	769262		445.468
17	cg26516004	TC15002282.hg.1	-0.517518	0.550426	0.347373	no	+	15	75019376	CYP1A1	TSS1500	S_Shore	15	+	74779937	74796235	74779937		-239.439
6	cg23067299	TC05000003.hg.1	0.305019	0.32574	0.349337	no	+	5	323907	AHRR	Body	S_Shore	5	+	191626	195468	191626	LRRC14B	-132.281
17	cg00213123	TC15001652.hg.1	0.29097	0.31227	0.351707	no	+	15	75019070	CYP1A1	TSS1500	Island	15	-	75212132	75230509	75230509	COX5A	211.439
16	cg17454592	TC15002131.hg.1	-0.396889	0.426228	0.35203	no	-	15	33360353	FMN1	TSS1500	OpenSea	15	+	32892388	32893206	32892388		-467.965
18	cg02869559	TC21000940.hg.1	0.0448201	0.0481767	0.352464	no	+	21	36259067	RUNX1	Body;Body;Body	Island	21	-	35821672	35831893	35831893	KCNE1	-427.174
2	cg25189904	TC01004455.hg.1	-0.208473	0.224492	0.353336	no	-	1	68299493	GNG12	TSS1500	S_Shore	1	+	67863729	67866317	67863729		-435.764
7	cg01876548	TC05002598.hg.1	-0.14746	0.159147	0.354415	no	-	5	124126863			OpenSea	5	+	123791066	123795791	123791066		-335.797
17	cg13570656	TC15002284.hg.1	-0.0895846	0.0968307	0.35514	no	+	15	75019196	CYP1A1	TSS1500	Island	15	+	75287876	75313836	75287876	SCAMP5	268.68
17	cg00213123	TC15000682.hg.1	0.122928	0.132901	0.355245	no	+	15	75019070	CYP1A1	TSS1500	Island	15	+	74833518	74890472	74833518	ARID3B	-185.552
17	cg12101586	TC15001647.hg.1	0.0283359	0.0306689	0.355783	no	+	15	75019203	CYP1A1	TSS1500	Island	15	-	75011883	75017951	75017951	CYP1A1	-1.252
18	cg00994804	TC21000694.hg.1	0.0487546	0.0530172	0.358041	no	+	21	36259383	RUNX1	1stExon;1stExon;Body	Island	21	+	36299506	36301769	36299506		40.123
17	cg11924019	TC15002281.hg.1	0.0971643	0.105844	0.358882	no	+	15	75019283	CYP1A1	TSS1500	Island	15	+	74753606	74773633	74753606	UBL7-AS1	-265.677
8	cg05767720	TC06001532.hg.1	-0.095437	0.103999	0.359048	no	+	6	32117281	PRRT1	Body	N_Shore	6	-	31606805	31620482	31620482	BAG6	-496.799
18	cg01664727	TC21000945.hg.1	0.0974025	0.106189	0.359266	no	+	21	36258423	RUNX1	Body;Body;Body	N_Shore	21	-	36314114	36317337	36317337		58.914
8	cg05767720	TC06000389.hg.1	-0.0581743	0.0637601	0.361819	no	+	6	32117281	PRRT1	Body	N_Shore	6	+	31926581	31937532	31926581	SKIV2L	-190.7
17	cg26516004	TC15001646.hg.1	0.472543	0.52073	0.364417	no	+	15	75019376	CYP1A1	TSS1500	S_Shore	15	-	74922899	74988386	74988386	EDC3	-30.99
4	cg18703066	TC02003464.hg.1	1.22551	1.35079	0.364527	no	-	2	105363536			OpenSea	2	+	105719098	105720244	105719098		355.562
18	cg01664727	TC21000415.hg.1	-0.0649173	0.0717695	0.365972	no	+	21	36258423	RUNX1	Body;Body;Body	N_Shore	21	-	35772615	35773370	35773370	C21orf140	-485.053
15	cg25464840	TC10001054.hg.1	0.109566	0.121272	0.36653	no	+	10	14372910	FRMD4A	TSS200	OpenSea	10	-	14560556	14816896	14816896	FAM107B	443.986
3	cg09935388	TC01000855.hg.1	0.171577	0.190186	0.367228	no	-	1	92947588	GFI1	Body;Body;Body	Island	1	+	93303575	93303627	93303575		355.987
18	cg01664727	TC21000422.hg.1	0.0441271	0.0489983	0.368063	no	+	21	36258423	RUNX1	Body;Body;Body	N_Shore	21	-	36096105	36109478	36109478	LINC00160	-148.945
10	cg22132788	TC07000280.hg.1	0.0734468	0.0818735	0.36993	no	+	7	45002486	MYO1G	Body	Island	7	+	45039074	45116069	45039074	CCM2	36.588
18	cg01664727	TC21000695.hg.1	-0.0660466	0.0738805	0.371592	no	+	21	36258423	RUNX1	Body;Body;Body	N_Shore	21	+	36377027	36384582	36377027		118.604
17	cg11924019	TC15001654.hg.1	0.260737	0.291741	0.37172	no	+	15	75019283	CYP1A1	TSS1500	Island	15	-	75275615	75275717	75275717		256.434
2	cg25189904	TC01004457.hg.1	0.0438028	0.0492237	0.373785	no	-	1	68299493	GNG12	TSS1500	S_Shore	1	+	68297986	68668670	68297986	GNG12-AS1	-1.507
13	cg17199018	TC08001083.hg.1	0.173374	0.195141	0.374545	no	-	8	28206278	ZNF395	Body	OpenSea	8	-	27560526	27941388	27941388	NUGGC	-264.89
6	cg23067299	TC05001095.hg.1	0.164208	0.185193	0.375497	no	+	5	323907	AHRR	Body	S_Shore	5	-	466239	473213	473213	PP7080	149.306
13	cg17199018	TC08000216.hg.1	-0.0956284	0.108064	0.376447	no	-	8	28206278	ZNF395	Body	OpenSea	8	+	27947190	28048673	27947190	ELP3	-259.088
6	cg21161138	TC05000010.hg.1	0.175085	0.198631	0.378318	no	-	5	399360	AHRR	Body	OpenSea	5	+	892758	919472	892758	TRIP13	493.398
17	cg18092474	TC15001645.hg.1	-0.0864515	0.0981475	0.378656	no	+	15	75019302	CYP1A1	TSS1500	Island	15	-	74783299	74783372	74783372		-235.93
6	cg21161138	TC05001092.hg.1	0.155662	0.17698	0.379353	no	-	5	399360	AHRR	Body	OpenSea	5	-	204872	218330	218330	CCDC127	-181.03
17	cg12101586	TC15001654.hg.1	0.173157	0.197306	0.380402	no	+	15	75019203	CYP1A1	TSS1500	Island	15	-	75275615	75275717	75275717		256.514
17	cg13570656	TC15000688.hg.1	-0.0418928	0.0477525	0.380575	no	+	15	75019196	CYP1A1	TSS1500	Island	15	+	75287876	75313836	75287876	SCAMP5	268.68
15	cg25464840	TC10000111.hg.1	0.13744	0.15702	0.381654	no	+	10	14372910	FRMD4A	TSS200	OpenSea	10	+	14694741	14703690	14694741		321.831
16	cg17454592	TC15002471.hg.1	0.78073	0.894952	0.383251	no	-	15	33360353	FMN1	TSS1500	OpenSea	15	-	33057747	33059570	33059570	FMN1	-300.783
17	cg12101586	TC15002285.hg.1	-0.0720821	0.0828633	0.384604	no	+	15	75019203	CYP1A1	TSS1500	Island	15	+	75288945	75289555	75288945		269.742
6	cg23067299	TC05002175.hg.1	0.430418	0.496955	0.386672	no	+	5	323907	AHRR	Body	S_Shore	5	+	667579	668841	667579	LOC100132605	343.672
17	cg00213123	TC15002800.hg.1	-0.13152	0.152064	0.387336	no	+	15	75019070	CYP1A1	TSS1500	Island	15	+	74890843	74901066	74890843	CLK3	-128.227
10	cg19089201	TC07001349.hg.1	-0.0610945	0.0707641	0.388184	no	+	7	45002287	MYO1G	3'UTR	Island	7	-	45022627	45026259	45026259	SNORA9;SNHG15	23.972
17	cg26516004	TC15001654.hg.1	-1.20451	1.40104	0.390179	no	+	15	75019376	CYP1A1	TSS1500	S_Shore	15	-	75275615	75275717	75275717		256.341
17	cg17852385	TC15002279.hg.1	0.150201	0.174754	0.390307	no	+	15	75019188	CYP1A1	TSS1500	Island	15	+	74646797	74656960	74646797		-372.391
11	cg04598670	TC07000423.hg.1	0.132917	0.154748	0.390621	no	-	7	68697651			OpenSea	7	+	68657145	68657199	68657145		-40.506
6	cg17924476	TC05001098.hg.1	-0.117261	0.13659	0.390862	no	+	5	323794	AHRR	Body	S_Shore	5	-	602735	612325	612325		288.531
6	cg21161138	TC05000003.hg.1	-0.188494	0.219755	0.391273	no	-	5	399360	AHRR	Body	OpenSea	5	+	191626	195468	191626	LRRC14B	-207.734
18	cg01664727	TC21000420.hg.1	-0.0216675	0.0252747	0.39153	no	+	21	36258423	RUNX1	Body;Body;Body	N_Shore	21	-	35885440	35987441	35987441	RCAN1	-270.982
6	cg21161138	TC05000009.hg.1	0.091488	0.107003	0.392786	no	-	5	399360	AHRR	Body	OpenSea	5	+	612387	667283	612387	CEP72	213.027
14	cg13822849	TC09000794.hg.1	-0.138433	0.161945	0.392891	no	+	9	137999757	OLFM1	Body	S_Shelf	9	+	138359934	138364095	138359934	PPP1R26-AS1	360.177
10	cg19089201	TC07001348.hg.1	-0.101015	0.118452	0.394012	no	+	7	45002287	MYO1G	3'UTR	Island	7	-	45002260	45018704	45018704	MYO1G	16.417
18	cg00994804	TC21000139.hg.1	-0.0232195	0.027484	0.398437	no	+	21	36259383	RUNX1	1stExon;1stExon;Body	Island	21	+	36096105	36109479	36096105	LINC00160	-163.278
17	cg26516004	TC15002624.hg.1	-0.550227	0.651867	0.398861	no	+	15	75019376	CYP1A1	TSS1500	S_Shore	15	-	74631628	74636162	74636162	CYP11A1	-383.214
10	cg04180046	TC07000279.hg.1	-0.0709527	0.0844339	0.400956	no	+	7	45002736	MYO1G	Body	Island	7	+	44888015	44889167	44888015		-114.721
17	cg05549655	TC15000681.hg.1	-0.0924913	0.11023	0.401663	no	+	15	75019143	CYP1A1	TSS1500	Island	15	+	74753606	74773633	74753606	UBL7-AS1	-265.537
6	cg21161138	TC05002175.hg.1	-0.281276	0.335244	0.401693	no	-	5	399360	AHRR	Body	OpenSea	5	+	667579	668841	667579	LOC100132605	268.219
17	cg00213123	TC15002281.hg.1	0.155182	0.185377	0.40276	no	+	15	75019070	CYP1A1	TSS1500	Island	15	+	74753606	74773633	74753606	UBL7-AS1	-265.464
18	cg01664727	TC21000138.hg.1	0.0398049	0.0477659	0.40489	no	+	21	36258423	RUNX1	Body;Body;Body	N_Shore	21	+	36041688	36090525	36041688	CLIC6	-216.735
14	cg13822849	TC09001702.hg.1	-0.141925	0.170367	0.405045	no	+	9	137999757	OLFM1	Body	S_Shelf	9	-	137541273	137544656	137544656		-455.101
4	cg18703066	TC02004465.hg.1	0.448447	0.539137	0.405761	no	-	2	105363536			OpenSea	2	-	105413578	105470027	105470027		106.491
10	cg04180046	TC07001350.hg.1	-0.0460466	0.0555759	0.407599	no	+	7	45002736	MYO1G	Body	Island	7	-	45120036	45128513	45128513	NACAD	125.777
16	cg17454592	TC15001179.hg.1	0.492156	0.594441	0.407941	no	-	15	33360353	FMN1	TSS1500	OpenSea	15	-	32894931	32894959	32894959		-465.394
7	cg01876548	TC05001733.hg.1	0.206974	0.25015	0.408242	no	-	5	124126863			OpenSea	5	-	124070311	124070868	124070868		-55.995
18	cg01664727	TC21000693.hg.1	-0.0391951	0.0473995	0.408519	no	+	21	36258423	RUNX1	Body;Body;Body	N_Shore	21	+	36118134	36157166	36118134		-140.289
10	cg12803068	TC07001352.hg.1	-0.100159	0.121171	0.408695	no	+	7	45002919	MYO1G	Body	S_Shore	7	-	45143948	45144081	45144081	SNORA5A	141.162
8	cg05767720	TC06002717.hg.1	-0.0588408	0.071231	0.409002	no	+	6	32117281	PRRT1	Body	N_Shore	6	+	31707725	31732624	31707725		-409.556
18	cg03142697	TC21000140.hg.1	-0.0273014	0.03308	0.409422	no	+	21	36258497	RUNX1	Body;Body;Body	N_Shore	21	+	36118054	36157183	36118054	LINC01426	-140.443
14	cg13822849	TC09000788.hg.1	-0.166377	0.202431	0.411366	no	+	9	137999757	OLFM1	Body	S_Shelf	9	+	137772654	137779924	137772654	FCN2	-227.103
17	cg18092474	TC15001654.hg.1	0.160877	0.19601	0.412011	no	+	15	75019302	CYP1A1	TSS1500	Island	15	-	75275615	75275717	75275717		256.415
18	cg03142697	TC21000695.hg.1	-0.0491203	0.0598629	0.412133	no	+	21	36258497	RUNX1	Body;Body;Body	N_Shore	21	+	36377027	36384582	36377027		118.53
17	cg13570656	TC15002280.hg.1	-0.0526732	0.0642504	0.412552	no	+	15	75019196	CYP1A1	TSS1500	Island	15	+	74683013	74685651	74683013		-336.183
17	cg22549041	TC15002284.hg.1	-0.0727184	0.0888435	0.413299	no	+	15	75019251	CYP1A1	TSS1500	Island	15	+	75287876	75313836	75287876	SCAMP5	268.625
6	cg11902777	TC05002173.hg.1	-0.238684	0.292717	0.415064	no	-	5	368843	AHRR	Body	N_Shore	5	+	468367	472052	468367		99.524
17	cg00213123	TC15000690.hg.1	-0.180166	0.220962	0.415088	no	+	15	75019070	CYP1A1	TSS1500	Island	15	+	75315896	75343067	75315896	PPCDC	296.826
15	cg25464840	TC10000109.hg.1	0.115715	0.142054	0.415536	no	+	10	14372910	FRMD4A	TSS200	OpenSea	10	+	14116283	14129604	14116283		-256.627
8	cg05767720	TC06001555.hg.1	0.0416717	0.0511893	0.415831	no	+	6	32117281	PRRT1	Body	N_Shore	6	-	31976197	31981050	31981050	TNXB;TNXA	-136.231
16	cg17454592	TC15000225.hg.1	0.260906	0.320755	0.416208	no	-	15	33360353	FMN1	TSS1500	OpenSea	15	+	32962080	32963900	32962080		-398.273
17	cg18092474	TC15001643.hg.1	-0.0745933	0.0920953	0.418189	no	+	15	75019302	CYP1A1	TSS1500	Island	15	-	74701630	74726300	74726300	SEMA7A	-293.002
10	cg22132788	TC07001350.hg.1	-0.0405631	0.0501475	0.418812	no	+	7	45002486	MYO1G	Body	Island	7	-	45120036	45128513	45128513	NACAD	126.027
10	cg04180046	TC07001344.hg.1	-0.0781068	0.0968451	0.420171	no	+	7	45002736	MYO1G	Body	Island	7	-	44617493	44621886	44621886	TMED4	-380.85
10	cg12803068	TC07001350.hg.1	-0.0262852	0.0327704	0.422717	no	+	7	45002919	MYO1G	Body	S_Shore	7	-	45120036	45128513	45128513	NACAD	125.594
18	cg01664727	TC21000942.hg.1	0.0554125	0.0691763	0.423335	no	+	21	36258423	RUNX1	Body;Body;Body	N_Shore	21	-	36089937	36090503	36090503	CLIC6	-167.92
6	cg05575921	TC05000007.hg.1	-0.153409	0.191595	0.423533	no	-	5	373378	AHRR	Body	N_Shore	5	+	478238	480999	478238	LOC100288152	104.86
6	cg23067299	TC05003402.hg.1	0.20095	0.251309	0.424156	no	+	5	323907	AHRR	Body	S_Shore	5	-	710472	767323	767323	ZDHHC11B	443.416
4	cg18703066	TC02000644.hg.1	-0.734403	0.922842	0.426365	no	-	2	105363536			OpenSea	2	+	105858200	105859924	105858200	GPR45	494.664
7	cg01876548	TC05001734.hg.1	0.156541	0.197463	0.428136	no	-	5	124126863			OpenSea	5	-	124204665	124205607	124205607		78.744
17	cg26516004	TC15001652.hg.1	0.676672	0.8564	0.429668	no	+	15	75019376	CYP1A1	TSS1500	S_Shore	15	-	75212132	75230509	75230509	COX5A	211.133
9	cg07105221	TC07000050.hg.1	-0.0277029	0.0351126	0.430347	no	-	7	4859448	RADIL	Body	S_Shelf	7	+	5314000	5343704	5314000	SLC29A4	454.552
10	cg12803068	TC07002290.hg.1	-0.0568758	0.072349	0.432008	no	+	7	45002919	MYO1G	Body	S_Shore	7	+	45241393	45243749	45241393		238.474
2	cg25189904	TC01002760.hg.1	0.0573508	0.0731889	0.433492	no	-	1	68299493	GNG12	TSS1500	S_Shore	1	-	68167149	68299155	68299155	GNG12	-0.338
17	cg26516004	TC15000684.hg.1	0.270759	0.346154	0.434318	no	+	15	75019376	CYP1A1	TSS1500	S_Shore	15	+	75041184	75048941	75041184	CYP1A2	21.808
8	cg05767720	TC06003595.hg.1	0.0944203	0.121007	0.435435	no	+	6	32117281	PRRT1	Body	N_Shore	6	-	31939135	31939783	31939783	DXO	-177.498
17	cg00213123	TC15000691.hg.1	-0.246518	0.316133	0.435729	no	+	15	75019070	CYP1A1	TSS1500	Island	15	+	75491233	75504510	75491233	C15orf39	472.163
6	cg05575921	TC05000002.hg.1	-0.0684284	0.087834	0.436157	no	-	5	373378	AHRR	Body	N_Shore	5	+	140373	190087	140373	PLEKHG4B	-233.005
6	cg17924476	TC05001099.hg.1	-0.0593195	0.0762461	0.436784	no	+	5	323794	AHRR	Body	S_Shore	5	-	659977	693510	693510	TPPP	369.716
6	cg23067299	TC05000001.hg.1	-0.227571	0.292647	0.437001	no	+	5	323907	AHRR	Body	S_Shore	5	+	92266	139978	92266		-231.641
3	cg09935388	TC01000849.hg.1	0.0630485	0.0811783	0.43757	no	-	1	92947588	GFI1	Body;Body;Body	Island	1	+	92495533	92529093	92495533	EPHX4	-452.055
10	cg12803068	TC07000281.hg.1	0.0334505	0.0431594	0.438526	no	+	7	45002919	MYO1G	Body	S_Shore	7	+	45197367	45225901	45197367	RAMP3	194.448
17	cg05549655	TC15000690.hg.1	-0.109418	0.141267	0.438819	no	+	15	75019143	CYP1A1	TSS1500	Island	15	+	75315896	75343067	75315896	PPCDC	296.753
6	cg05575921	TC05003403.hg.1	-0.0800435	0.10357	0.43983	no	-	5	373378	AHRR	Body	N_Shore	5	-	795720	851101	851101	ZDHHC11	477.723
8	cg05767720	TC06000393.hg.1	0.0305951	0.0395932	0.439892	no	+	6	32117281	PRRT1	Body	N_Shore	6	+	32006042	32009447	32006042	CYP21A2	-111.239
4	cg18703066	TC02002158.hg.1	-0.666869	0.870352	0.443765	no	-	2	105363536			OpenSea	2	-	105104914	105136671	105136671	LINC01103	-226.865
10	cg19089201	TC07002923.hg.1	0.139972	0.183271	0.44523	no	+	7	45002287	MYO1G	3'UTR	Island	7	-	44915900	44918584	44918584	PURB	-83.703
3	cg14179389	TC01000856.hg.1	0.0682014	0.0896434	0.446982	no	-	1	92947961	GFI1	Body;Body;Body	Island	1	+	93311616	93311739	93311616		363.655
10	cg22132788	TC07001342.hg.1	-0.0221662	0.0291888	0.447817	no	+	7	45002486	MYO1G	Body	Island	7	-	44552134	44580914	44580914	NPC1L1	-421.572
17	cg22549041	TC15001645.hg.1	-0.0598656	0.078876	0.448072	no	+	15	75019251	CYP1A1	TSS1500	Island	15	-	74783299	74783372	74783372		-235.879
17	cg11924019	TC15002279.hg.1	0.14593	0.192832	0.449395	no	+	15	75019283	CYP1A1	TSS1500	Island	15	+	74646797	74656960	74646797		-372.486
17	cg12101586	TC15000690.hg.1	-0.0642177	0.0853348	0.451934	no	+	15	75019203	CYP1A1	TSS1500	Island	15	+	75315896	75343067	75315896	PPCDC	296.693
14	cg13822849	TC09001716.hg.1	0.124073	0.164941	0.452121	no	+	9	137999757	OLFM1	Body	S_Shelf	9	-	138395119	138398293	138398293	LOC101928525	398.536
18	cg02869559	TC21000415.hg.1	-0.0424538	0.0565289	0.452853	no	+	21	36259067	RUNX1	Body;Body;Body	Island	21	-	35772615	35773370	35773370	C21orf140	-485.697
11	cg04598670	TC07001479.hg.1	0.107284	0.143003	0.453329	no	-	7	68697651			OpenSea	7	-	68972496	68972608	68972608		274.957
6	cg23067299	TC05002795.hg.1	0.257977	0.344348	0.453956	no	+	5	323907	AHRR	Body	S_Shore	5	-	414939	417808	417808		93.901
10	cg12803068	TC07001342.hg.1	-0.0142805	0.0190743	0.454258	no	+	7	45002919	MYO1G	Body	S_Shore	7	-	44552134	44580914	44580914	NPC1L1	-422.005
7	cg01876548	TC05003215.hg.1	0.115453	0.154473	0.455025	no	-	5	124126863			OpenSea	5	-	123828468	123872041	123872041		-254.822
10	cg04180046	TC07001348.hg.1	-0.0981894	0.131609	0.455831	no	+	7	45002736	MYO1G	Body	Island	7	-	45002260	45018704	45018704	MYO1G	15.968
17	cg17852385	TC15002280.hg.1	-0.0735841	0.0989688	0.457378	no	+	15	75019188	CYP1A1	TSS1500	Island	15	+	74683013	74685651	74683013		-336.175
18	cg03142697	TC21000422.hg.1	0.0294444	0.0397048	0.458543	no	+	21	36258497	RUNX1	Body;Body;Body	N_Shore	21	-	36096105	36109478	36109478	LINC00160	-149.019
6	cg11902777	TC05002800.hg.1	-0.53378	0.72116	0.4594	no	-	5	368843	AHRR	Body	N_Shore	5	-	654144	654462	654462		285.619
17	cg17852385	TC15000681.hg.1	-0.0659676	0.0892431	0.459994	no	+	15	75019188	CYP1A1	TSS1500	Island	15	+	74753606	74773633	74753606	UBL7-AS1	-265.582
17	cg00213123	TC15001650.hg.1	-0.195872	0.2651	0.460195	no	+	15	75019070	CYP1A1	TSS1500	Island	15	-	75136071	75165719	75165719	SCAMP2	146.649
17	cg13570656	TC15000684.hg.1	0.0312692	0.0424179	0.461222	no	+	15	75019196	CYP1A1	TSS1500	Island	15	+	75041184	75048941	75041184	CYP1A2	21.988
6	cg05575921	TC05001098.hg.1	-0.193106	0.262642	0.462392	no	-	5	373378	AHRR	Body	N_Shore	5	-	602735	612325	612325		238.947
9	cg07105221	TC07001115.hg.1	-0.0937656	0.127661	0.462851	no	-	7	4859448	RADIL	Body	S_Shelf	7	-	5160941	5184177	5184177	ZNF890P	324.729
3	cg14179389	TC01002866.hg.1	-0.0563732	0.0769891	0.464233	no	-	1	92947961	GFI1	Body;Body;Body	Island	1	-	92711955	92764566	92764566	GLMN	-183.395
17	cg12101586	TC15002284.hg.1	-0.0812772	0.111309	0.465471	no	+	15	75019203	CYP1A1	TSS1500	Island	15	+	75287876	75313836	75287876	SCAMP5	268.673
1	cg18540492	TC01004376.hg.1	-0.324305	0.4442	0.465536	no	+	1	50489418	AGBL4	Body	Island	1	+	50772147	50773062	50772147		282.729
8	cg05767720	TC06000400.hg.1	0.482994	0.663942	0.46714	no	+	6	32117281	PRRT1	Body	N_Shore	6	+	32595956	32614839	32595956	HLA-DQA1	478.675
17	cg22549041	TC15001652.hg.1	0.0700206	0.0962784	0.467258	no	+	15	75019251	CYP1A1	TSS1500	Island	15	-	75212132	75230509	75230509	COX5A	211.258
17	cg17852385	TC15001652.hg.1	0.117454	0.161643	0.467652	no	+	15	75019188	CYP1A1	TSS1500	Island	15	-	75212132	75230509	75230509	COX5A	211.321
6	cg23067299	TC05002799.hg.1	-0.190024	0.262275	0.468942	no	+	5	323907	AHRR	Body	S_Shore	5	-	602735	612325	612325		288.418
17	cg17852385	TC15001650.hg.1	-0.0991084	0.137201	0.47027	no	+	15	75019188	CYP1A1	TSS1500	Island	15	-	75136071	75165719	75165719	SCAMP2	146.531
16	cg17454592	TC15002133.hg.1	0.251769	0.349886	0.471983	no	-	15	33360353	FMN1	TSS1500	OpenSea	15	+	33491502	33496534	33491502		131.149
17	cg17852385	TC15001651.hg.1	-0.0525589	0.0730988	0.47233	no	+	15	75019188	CYP1A1	TSS1500	Island	15	-	75192328	75199462	75199462	FAM219B	180.274
8	cg05767720	TC06004074.hg.1	-0.0676989	0.0942291	0.472675	no	+	6	32117281	PRRT1	Body	N_Shore	6	+	31633013	31637847	31633013	CSNK2B	-484.268
18	cg03142697	TC21000415.hg.1	-0.0417285	0.0581584	0.473264	no	+	21	36258497	RUNX1	Body;Body;Body	N_Shore	21	-	35772615	35773370	35773370	C21orf140	-485.127
7	cg01876548	TC05000582.hg.1	-0.0954717	0.133767	0.475596	no	-	5	124126863			OpenSea	5	+	123731296	123736348	123731296		-395.567
10	cg22132788	TC07001343.hg.1	-0.0589331	0.0826745	0.476144	no	+	7	45002486	MYO1G	Body	Island	7	-	44605016	44614650	44614650	DDX56	-387.836
17	cg26516004	TC15002800.hg.1	0.29643	0.417034	0.477399	no	+	15	75019376	CYP1A1	TSS1500	S_Shore	15	+	74890843	74901066	74890843	CLK3	-128.533
17	cg13570656	TC15001650.hg.1	-0.0633158	0.0890776	0.477405	no	+	15	75019196	CYP1A1	TSS1500	Island	15	-	75136071	75165719	75165719	SCAMP2	146.523
6	cg05575921	TC05002803.hg.1	0.216019	0.304556	0.478337	no	-	5	373378	AHRR	Body	N_Shore	5	-	767618	769262	769262		395.884
4	cg18703066	TC02004467.hg.1	-0.615171	0.869551	0.479475	no	-	2	105363536			OpenSea	2	-	105719308	105720606	105720606		357.07
10	cg12803068	TC07001343.hg.1	-0.0379799	0.0540263	0.482254	no	+	7	45002919	MYO1G	Body	S_Shore	7	-	44605016	44614650	44614650	DDX56	-388.269
10	cg19089201	TC07001342.hg.1	-0.0204702	0.0291194	0.482264	no	+	7	45002287	MYO1G	3'UTR	Island	7	-	44552134	44580914	44580914	NPC1L1	-421.373
17	cg12101586	TC15000689.hg.1	0.049842	0.0710903	0.483426	no	+	15	75019203	CYP1A1	TSS1500	Island	15	+	75288945	75289555	75288945	SCAMP5	269.742
14	cg13822849	TC09002340.hg.1	-0.121641	0.173638	0.483777	no	+	9	137999757	OLFM1	Body	S_Shelf	9	+	137884804	137887700	137884804	LOC157931	-114.953
6	cg23067299	TC05002171.hg.1	-0.174763	0.249648	0.484094	no	+	5	323907	AHRR	Body	S_Shore	5	+	92264	139978	92264		-231.643
6	cg23067299	TC05000008.hg.1	-0.208983	0.298706	0.48435	no	+	5	323907	AHRR	Body	S_Shore	5	+	524820	526709	524820		200.913
17	cg13570656	TC15002279.hg.1	0.0793524	0.113475	0.484556	no	+	15	75019196	CYP1A1	TSS1500	Island	15	+	74646797	74656960	74646797		-372.399
6	cg05575921	TC05000001.hg.1	-0.151357	0.217854	0.487392	no	-	5	373378	AHRR	Body	N_Shore	5	+	92266	139978	92266		-281.112
10	cg19089201	TC07001340.hg.1	0.0377716	0.0544517	0.488076	no	+	7	45002287	MYO1G	3'UTR	Island	7	-	44421965	44530479	44530479	NUDCD3	-471.808
10	cg04180046	TC07002289.hg.1	0.0699669	0.100999	0.488656	no	+	7	45002736	MYO1G	Body	Island	7	+	45228588	45232084	45228588		225.852
17	cg05549655	TC15002280.hg.1	-0.0846201	0.12226	0.489041	no	+	15	75019143	CYP1A1	TSS1500	Island	15	+	74683013	74685651	74683013		-336.13
14	cg13822849	TC09002338.hg.1	-0.158115	0.228706	0.489536	no	+	9	137999757	OLFM1	Body	S_Shelf	9	+	137660930	137661381	137660930		-338.827
17	cg00213123	TC15002279.hg.1	0.233297	0.337718	0.489875	no	+	15	75019070	CYP1A1	TSS1500	Island	15	+	74646797	74656960	74646797		-372.273
8	cg05767720	TC06003593.hg.1	0.0586971	0.0851115	0.490602	no	+	6	32117281	PRRT1	Body	N_Shore	6	-	31654726	31671137	31671137		-446.144
16	cg17454592	TC15001180.hg.1	-0.268274	0.38966	0.491336	no	-	15	33360353	FMN1	TSS1500	OpenSea	15	-	32898619	32907361	32907361		-452.992
6	cg11902777	TC05000005.hg.1	-0.0671111	0.0977074	0.492358	no	-	5	368843	AHRR	Body	N_Shore	5	+	271736	438406	271736	AHRR;PDCD6	-97.107
6	cg17924476	TC05002172.hg.1	-0.102937	0.150008	0.492765	no	+	5	323794	AHRR	Body	S_Shore	5	+	195893	196449	195893		-127.901
6	cg05575921	TC05002792.hg.1	0.221196	0.323082	0.493755	no	-	5	373378	AHRR	Body	N_Shore	5	-	26322	37720	37720		-335.658
12	cg25949550	TC07001986.hg.1	0.22979	0.336824	0.49528	no	-	7	145814306	CNTNAP2	Body	S_Shore	7	-	146113350	146113645	146113645		299.339
8	cg05767720	TC06002719.hg.1	-0.0558755	0.0821265	0.496461	no	+	6	32117281	PRRT1	Body	N_Shore	6	+	31938952	31949223	31938952	STK19	-178.329
15	cg15507334	TC10000111.hg.1	0.109338	0.161422	0.498371	no	+	10	14372913	FRMD4A	TSS200	OpenSea	10	+	14694741	14703690	14694741		321.828
6	cg23067299	TC05001092.hg.1	-0.177713	0.262404	0.498432	no	+	5	323907	AHRR	Body	S_Shore	5	-	204872	218330	218330	CCDC127	-105.577
17	cg17852385	TC15000689.hg.1	0.064438	0.0952743	0.499006	no	+	15	75019188	CYP1A1	TSS1500	Island	15	+	75288945	75289555	75288945	SCAMP5	269.757
17	cg05549655	TC15000686.hg.1	-0.024441	0.0361453	0.499103	no	+	15	75019143	CYP1A1	TSS1500	Island	15	+	75105057	75124143	75105057	CPLX3;LMAN1L	85.914
17	cg18092474	TC15000681.hg.1	-0.0446606	0.0661539	0.499794	no	+	15	75019302	CYP1A1	TSS1500	Island	15	+	74753606	74773633	74753606	UBL7-AS1	-265.696
10	cg22132788	TC07001352.hg.1	-0.12501	0.185449	0.500435	no	+	7	45002486	MYO1G	Body	Island	7	-	45143948	45144081	45144081	SNORA5A	141.595
18	cg03142697	TC21000941.hg.1	-0.0531918	0.0789184	0.500487	no	+	21	36258497	RUNX1	Body;Body;Body	N_Shore	21	-	35949774	35950546	35950546		-307.951
17	cg22549041	TC15001644.hg.1	0.0493875	0.0735767	0.50225	no	+	15	75019251	CYP1A1	TSS1500	Island	15	-	74738318	74753529	74753529	UBL7	-265.722
8	cg05767720	TC06001563.hg.1	-0.0702872	0.10481	0.502646	no	+	6	32117281	PRRT1	Body	N_Shore	6	-	32158543	32163300	32163300	GPSM3	46.019
17	cg18092474	TC15002281.hg.1	0.0476403	0.0711241	0.503154	no	+	15	75019302	CYP1A1	TSS1500	Island	15	+	74753606	74773633	74753606	UBL7-AS1	-265.696
4	cg18703066	TC02003463.hg.1	-0.878981	1.31247	0.50322	no	-	2	105363536			OpenSea	2	+	105474040	105475032	105474040		110.504
17	cg11924019	TC15001646.hg.1	0.072611	0.10846	0.503377	no	+	15	75019283	CYP1A1	TSS1500	Island	15	-	74922899	74988386	74988386	EDC3	-30.897
17	cg18092474	TC15000680.hg.1	-0.0596435	0.0892036	0.503917	no	+	15	75019302	CYP1A1	TSS1500	Island	15	+	74646797	74656961	74646797	LOC729739	-372.505
17	cg11924019	TC15002283.hg.1	0.122038	0.182975	0.504975	no	+	15	75019283	CYP1A1	TSS1500	Island	15	+	74800497	74806312	74800497		-218.786
16	cg17454592	TC15000222.hg.1	-0.278821	0.419394	0.506346	no	-	15	33360353	FMN1	TSS1500	OpenSea	15	+	32885657	32896179	32885657	GOLGA8N	-474.696
17	cg11924019	TC15000689.hg.1	0.0697843	0.105121	0.506967	no	+	15	75019283	CYP1A1	TSS1500	Island	15	+	75288945	75289555	75288945	SCAMP5	269.662
17	cg17852385	TC15001644.hg.1	0.0819422	0.123529	0.50729	no	+	15	75019188	CYP1A1	TSS1500	Island	15	-	74738318	74753529	74753529	UBL7	-265.659
17	cg05549655	TC15002800.hg.1	0.0644147	0.0972322	0.50784	no	+	15	75019143	CYP1A1	TSS1500	Island	15	+	74890843	74901066	74890843	CLK3	-128.3
13	cg17199018	TC08001093.hg.1	0.0390398	0.0592795	0.510348	no	-	8	28206278	ZNF395	Body	OpenSea	8	-	28553718	28558981	28558981	EXTL3-AS1	352.703
10	cg12803068	TC07002289.hg.1	0.0392024	0.0595544	0.510547	no	+	7	45002919	MYO1G	Body	S_Shore	7	+	45228588	45232084	45228588		225.669
17	cg00213123	TC15001643.hg.1	-0.15754	0.240102	0.511913	no	+	15	75019070	CYP1A1	TSS1500	Island	15	-	74701630	74726300	74726300	SEMA7A	-292.77
10	cg19089201	TC07002290.hg.1	-0.072374	0.110458	0.512503	no	+	7	45002287	MYO1G	3'UTR	Island	7	+	45241393	45243749	45241393		239.106
6	cg23067299	TC05002803.hg.1	0.268027	0.409161	0.512602	no	+	5	323907	AHRR	Body	S_Shore	5	-	767618	769262	769262		445.355
17	cg22549041	TC15000689.hg.1	0.037122	0.0567488	0.513193	no	+	15	75019251	CYP1A1	TSS1500	Island	15	+	75288945	75289555	75288945	SCAMP5	269.694
18	cg00994804	TC21000141.hg.1	0.0642041	0.098291	0.5138	no	+	21	36259383	RUNX1	1stExon;1stExon;Body	Island	21	+	36231771	36231871	36231771		-27.612
10	cg04180046	TC07001340.hg.1	0.0393333	0.0604958	0.515749	no	+	7	45002736	MYO1G	Body	Island	7	-	44421965	44530479	44530479	NUDCD3	-472.257
17	cg17852385	TC15000684.hg.1	0.0422874	0.0653391	0.517677	no	+	15	75019188	CYP1A1	TSS1500	Island	15	+	75041184	75048941	75041184	CYP1A2	21.996
7	cg01876548	TC05003213.hg.1	0.121309	0.187732	0.518335	no	-	5	124126863			OpenSea	5	-	123716881	123721966	123721966		-404.897
4	cg18703066	TC02000636.hg.1	0.751114	1.16302	0.518561	no	-	2	105363536			OpenSea	2	+	105199610	105201812	105199610	LOC105373525	-163.926
4	cg18703066	TC02000639.hg.1	0.725312	1.12337	0.518674	no	-	2	105363536			OpenSea	2	+	105320216	105321967	105320216		-43.32
3	cg14179389	TC01002870.hg.1	-0.0710518	0.110433	0.520143	no	-	1	92947961	GFI1	Body;Body;Body	Island	1	-	93298286	93427079	93427079	FAM69A	479.118
6	cg21161138	TC05002798.hg.1	-0.21926	0.341188	0.520632	no	-	5	399360	AHRR	Body	OpenSea	5	-	553527	554002	554002		154.642
10	cg04180046	TC07002286.hg.1	0.0652644	0.102495	0.524454	no	+	7	45002736	MYO1G	Body	Island	7	+	45022562	45023645	45022562		19.826
17	cg22549041	TC15001643.hg.1	-0.0470094	0.0740145	0.525508	no	+	15	75019251	CYP1A1	TSS1500	Island	15	-	74701630	74726300	74726300	SEMA7A	-292.951
10	cg04180046	TC07000276.hg.1	0.0780052	0.122956	0.525978	no	+	7	45002736	MYO1G	Body	Island	7	+	44646121	44748669	44646121	OGDH	-356.615
17	cg26516004	TC15001642.hg.1	-0.128792	0.203692	0.527369	no	+	15	75019376	CYP1A1	TSS1500	S_Shore	15	-	74630100	74660081	74660081	CYP11A1	-359.295
17	cg13570656	TC15001656.hg.1	-0.0389704	0.0618045	0.528508	no	+	15	75019196	CYP1A1	TSS1500	Island	15	-	75413877	75414007	75414007		394.811
18	cg01664727	TC21000139.hg.1	-0.0263441	0.0418454	0.529151	no	+	21	36258423	RUNX1	Body;Body;Body	N_Shore	21	+	36096105	36109479	36096105	LINC00160	-162.318
17	cg05549655	TC15000682.hg.1	0.0534839	0.0849865	0.529306	no	+	15	75019143	CYP1A1	TSS1500	Island	15	+	74833518	74890472	74833518	ARID3B	-185.625
6	cg23067299	TC05002176.hg.1	0.105994	0.168963	0.530616	no	+	5	323907	AHRR	Body	S_Shore	5	+	693675	785956	693675		369.768
15	cg15507334	TC10000108.hg.1	-0.110216	0.175751	0.530751	no	+	10	14372913	FRMD4A	TSS200	OpenSea	10	+	14033815	14049525	14033815		-339.098
13	cg17199018	TC08002264.hg.1	0.0940762	0.1508	0.532894	no	-	8	28206278	ZNF395	Body	OpenSea	8	-	28156121	28156555	28156555		-49.723
4	cg18703066	TC02003466.hg.1	-0.421603	0.678056	0.534251	no	-	2	105363536			OpenSea	2	+	105760571	105761882	105760571		397.035
16	cg17454592	TC15000227.hg.1	0.273988	0.440701	0.534298	no	-	15	33360353	FMN1	TSS1500	OpenSea	15	+	33187401	33187502	33187401		-172.952
13	cg17199018	TC08000219.hg.1	-0.0639496	0.103387	0.536381	no	-	8	28206278	ZNF395	Body	OpenSea	8	+	28304781	28313419	28304781		98.503
7	cg01876548	TC05000594.hg.1	0.125381	0.202796	0.536565	no	-	5	124126863			OpenSea	5	+	124255640	124257291	124255640		128.777
2	cg25189904	TC01000745.hg.1	-0.0630262	0.102291	0.537962	no	-	1	68299493	GNG12	TSS1500	S_Shore	1	+	68150744	68154021	68150744	GADD45A	-148.749
17	cg12101586	TC15002624.hg.1	-0.0563581	0.0918211	0.539522	no	+	15	75019203	CYP1A1	TSS1500	Island	15	-	74631628	74636162	74636162	CYP11A1	-383.041
17	cg22549041	TC15001642.hg.1	0.0140526	0.0228986	0.539583	no	+	15	75019251	CYP1A1	TSS1500	Island	15	-	74630100	74660081	74660081	CYP11A1	-359.17
15	cg25464840	TC10001055.hg.1	0.125725	0.204956	0.53976	no	+	10	14372910	FRMD4A	TSS200	OpenSea	10	-	14705394	14705493	14705493		332.583
17	cg12101586	TC15000691.hg.1	-0.074776	0.122099	0.540423	no	+	15	75019203	CYP1A1	TSS1500	Island	15	+	75491233	75504510	75491233	C15orf39	472.03
17	cg05549655	TC15000689.hg.1	0.0720498	0.117696	0.54059	no	+	15	75019143	CYP1A1	TSS1500	Island	15	+	75288945	75289555	75288945	SCAMP5	269.802
10	cg12803068	TC07002283.hg.1	-0.042788	0.0699511	0.540909	no	+	7	45002919	MYO1G	Body	S_Shore	7	+	44622024	44623270	44622024		-380.895
6	cg05575921	TC05000009.hg.1	0.0722105	0.118098	0.541068	no	-	5	373378	AHRR	Body	N_Shore	5	+	612387	667283	612387	CEP72	239.009
6	cg17924476	TC05001092.hg.1	-0.0619599	0.101599	0.542125	no	+	5	323794	AHRR	Body	S_Shore	5	-	204872	218330	218330	CCDC127	-105.464
15	cg11813497	TC10001913.hg.1	0.084749	0.139551	0.543815	no	+	10	14372879	FRMD4A	TSS200	OpenSea	10	+	14116287	14129880	14116287	LOC101928453	-256.592
18	cg02869559	TC21000141.hg.1	0.0713075	0.117837	0.54525	no	+	21	36259067	RUNX1	Body;Body;Body	Island	21	+	36231771	36231871	36231771		-27.296
17	cg17852385	TC15000691.hg.1	0.0983836	0.163634	0.547837	no	+	15	75019188	CYP1A1	TSS1500	Island	15	+	75491233	75504510	75491233	C15orf39	472.045
8	cg05767720	TC06001546.hg.1	-0.0553077	0.0920061	0.547912	no	+	6	32117281	PRRT1	Body	N_Shore	6	-	31777396	31783501	31783501	HSPA1L;HSPA1B	-333.78
9	cg07105221	TC07003317.hg.1	-0.0459403	0.0770055	0.550942	no	-	7	4859448	RADIL	Body	S_Shelf	7	+	5013616	5080306	5013616	RNF216P1	154.168
17	cg11924019	TC15002624.hg.1	-0.0809346	0.135773	0.551265	no	+	15	75019283	CYP1A1	TSS1500	Island	15	-	74631628	74636162	74636162	CYP11A1	-383.121
1	cg18540492	TC01005475.hg.1	-0.515592	0.869048	0.553148	no	+	1	50489418	AGBL4	Body	Island	1	-	50444343	50461386	50461386		-28.032
14	cg13822849	TC09002849.hg.1	0.103437	0.174555	0.553622	no	+	9	137999757	OLFM1	Body	S_Shelf	9	-	138395119	138398293	138398293	LOC101928525	398.536
9	cg07105221	TC07000044.hg.1	-0.124757	0.210835	0.554189	no	-	7	4859448	RADIL	Body	S_Shelf	7	+	4729111	4729214	4729111		-130.337
13	cg17199018	TC08000220.hg.1	0.0619233	0.105303	0.556656	no	-	8	28206278	ZNF395	Body	OpenSea	8	+	28351722	28431785	28351722	FZD3	145.444
3	cg09935388	TC01002871.hg.1	0.0883838	0.150699	0.557701	no	-	1	92947588	GFI1	Body;Body;Body	Island	1	-	93435161	93435267	93435267		487.679
17	cg00213123	TC15001647.hg.1	0.0464476	0.0794409	0.558916	no	+	15	75019070	CYP1A1	TSS1500	Island	15	-	75011883	75017951	75017951	CYP1A1	-1.119
17	cg17852385	TC15002281.hg.1	0.0559899	0.0959591	0.559726	no	+	15	75019188	CYP1A1	TSS1500	Island	15	+	74753606	74773633	74753606	UBL7-AS1	-265.582
13	cg17199018	TC08001087.hg.1	-0.0271253	0.0464947	0.559774	no	-	8	28206278	ZNF395	Body	OpenSea	8	-	27727399	27850369	27850369	SCARA5	-355.909
6	cg17924476	TC05002797.hg.1	-0.0456524	0.078284	0.559937	no	+	5	323794	AHRR	Body	S_Shore	5	-	477487	483482	483482	SLC9A3	159.688
17	cg05549655	TC15001642.hg.1	0.027685	0.047491	0.560078	no	+	15	75019143	CYP1A1	TSS1500	Island	15	-	74630100	74660081	74660081	CYP11A1	-359.062
17	cg18092474	TC15002280.hg.1	-0.04272	0.0733687	0.560542	no	+	15	75019302	CYP1A1	TSS1500	Island	15	+	74683013	74685651	74683013		-336.289
17	cg12101586	TC15000681.hg.1	-0.0387432	0.0665995	0.560898	no	+	15	75019203	CYP1A1	TSS1500	Island	15	+	74753606	74773633	74753606	UBL7-AS1	-265.597
6	cg17924476	TC05002795.hg.1	0.0769562	0.133338	0.563988	no	+	5	323794	AHRR	Body	S_Shore	5	-	414939	417808	417808		94.014
9	cg07105221	TC07002118.hg.1	-0.0526749	0.0919017	0.566683	no	-	7	4859448	RADIL	Body	S_Shelf	7	+	4473994	4518319	4473994		-385.454
14	cg13822849	TC09002848.hg.1	0.0570665	0.0997979	0.567594	no	+	9	137999757	OLFM1	Body	S_Shelf	9	-	138354460	138372564	138372564		372.807
18	cg02869559	TC21000944.hg.1	-0.0503426	0.0882993	0.568735	no	+	21	36259067	RUNX1	Body;Body;Body	Island	21	-	36195761	36198703	36198703		-60.364
8	cg05767720	TC06003599.hg.1	-0.072338	0.127532	0.570718	no	+	6	32117281	PRRT1	Body	N_Shore	6	-	32148745	32152099	32152099	AGER	34.818
15	cg15507334	TC10001054.hg.1	0.0704965	0.124686	0.571954	no	+	10	14372913	FRMD4A	TSS200	OpenSea	10	-	14560556	14816896	14816896	FAM107B	443.983
17	cg22549041	TC15000684.hg.1	0.0219651	0.0389199	0.572653	no	+	15	75019251	CYP1A1	TSS1500	Island	15	+	75041184	75048941	75041184	CYP1A2	21.933
10	cg04180046	TC07002290.hg.1	-0.0689312	0.122723	0.574479	no	+	7	45002736	MYO1G	Body	Island	7	+	45241393	45243749	45241393		238.657
17	cg05549655	TC15001652.hg.1	0.112137	0.199699	0.574583	no	+	15	75019143	CYP1A1	TSS1500	Island	15	-	75212132	75230509	75230509	COX5A	211.366
17	cg22549041	TC15002801.hg.1	0.0256256	0.0457249	0.575333	no	+	15	75019251	CYP1A1	TSS1500	Island	15	+	74900713	74922542	74900713	CLK3	-118.538
6	cg17924476	TC05000002.hg.1	-0.0255766	0.0456922	0.575791	no	+	5	323794	AHRR	Body	S_Shore	5	+	140373	190087	140373	PLEKHG4B	-183.421
11	cg04598670	TC07000422.hg.1	0.091907	0.164197	0.575806	no	-	7	68697651			OpenSea	7	+	68590257	68590363	68590257		-107.394
4	cg18703066	TC02004458.hg.1	-0.504941	0.90671	0.577746	no	-	2	105363536			OpenSea	2	-	104913938	104991859	104991859		-371.677
3	cg14179389	TC01000851.hg.1	0.0569552	0.102388	0.578171	no	-	1	92947961	GFI1	Body;Body;Body	Island	1	+	92632542	92650280	92632542	KIAA1107	-315.419
16	cg17454592	TC15000224.hg.1	0.0721615	0.129865	0.578586	no	-	15	33360353	FMN1	TSS1500	OpenSea	15	+	32933870	32989299	32933870	SCG5	-426.483
11	cg04598670	TC07000419.hg.1	-0.0632051	0.114498	0.581077	no	-	7	68697651			OpenSea	7	+	68505139	68511790	68505139		-192.512
3	cg09935388	TC01000851.hg.1	-0.0597688	0.108493	0.581846	no	-	1	92947588	GFI1	Body;Body;Body	Island	1	+	92632542	92650280	92632542	KIAA1107	-315.046
12	cg25949550	TC07000959.hg.1	-0.874633	1.58796	0.58192	no	-	7	145814306	CNTNAP2	Body	S_Shore	7	+	145694484	145694512	145694484		-119.822
10	cg12803068	TC07000277.hg.1	0.0208683	0.0379274	0.582314	no	+	7	45002919	MYO1G	Body	S_Shore	7	+	44788180	44810735	44788180	ZMIZ2	-214.739
8	cg05767720	TC06001568.hg.1	0.0832663	0.151481	0.582682	no	+	6	32117281	PRRT1	Body	N_Shore	6	-	32517717	32517867	32517867		400.586
17	cg26516004	TC15001656.hg.1	0.275659	0.504409	0.584866	no	+	15	75019376	CYP1A1	TSS1500	S_Shore	15	-	75413877	75414007	75414007		394.631
3	cg14179389	TC01002871.hg.1	0.0776659	0.142223	0.58515	no	-	1	92947961	GFI1	Body;Body;Body	Island	1	-	93435161	93435267	93435267		487.306
10	cg19089201	TC07001346.hg.1	-0.0550572	0.100986	0.585759	no	+	7	45002287	MYO1G	3'UTR	Island	7	-	44866390	44887725	44887725	H2AFV	-114.562
9	cg07105221	TC07002765.hg.1	0.0574955	0.105731	0.586727	no	-	7	4859448	RADIL	Body	S_Shelf	7	-	4452562	4456136	4456136		-403.312
1	cg18540492	TC01002642.hg.1	-0.253282	0.466428	0.587254	no	+	1	50489418	AGBL4	Body	Island	1	-	50671756	50688799	50688799		199.381
16	cg17454592	TC15002474.hg.1	-0.0933252	0.172002	0.587559	no	-	15	33360353	FMN1	TSS1500	OpenSea	15	-	33595778	33602861	33602861		242.508
8	cg05767720	TC06001543.hg.1	0.0286065	0.0527487	0.587741	no	+	6	32117281	PRRT1	Body	N_Shore	6	-	31745295	31763730	31763730	VARS	-353.551
18	cg00994804	TC21000940.hg.1	0.0217517	0.0402003	0.588591	no	+	21	36259383	RUNX1	1stExon;1stExon;Body	Island	21	-	35821672	35831893	35831893	KCNE1	-427.49
17	cg13570656	TC15000680.hg.1	-0.0422461	0.0781397	0.588891	no	+	15	75019196	CYP1A1	TSS1500	Island	15	+	74646797	74656961	74646797	LOC729739	-372.399
10	cg19089201	TC07000281.hg.1	0.0355145	0.0658977	0.590073	no	+	7	45002287	MYO1G	3'UTR	Island	7	+	45197367	45225901	45197367	RAMP3	195.08
17	cg13570656	TC15002624.hg.1	-0.0430058	0.0798967	0.590532	no	+	15	75019196	CYP1A1	TSS1500	Island	15	-	74631628	74636162	74636162	CYP11A1	-383.034
17	cg00213123	TC15000685.hg.1	0.107942	0.20255	0.594229	no	+	15	75019070	CYP1A1	TSS1500	Island	15	+	75074425	75095539	75074425	CSK	55.355
12	cg25949550	TC07003222.hg.1	0.219092	0.411151	0.594259	no	-	7	145814306	CNTNAP2	Body	S_Shore	7	-	145372975	145378462	145378462		-435.844
10	cg12803068	TC07000276.hg.1	-0.038609	0.0725042	0.594513	no	+	7	45002919	MYO1G	Body	S_Shore	7	+	44646121	44748669	44646121	OGDH	-356.798
10	cg19089201	TC07001343.hg.1	-0.0436088	0.0824851	0.59716	no	+	7	45002287	MYO1G	3'UTR	Island	7	-	44605016	44614650	44614650	DDX56	-387.637
10	cg04180046	TC07002925.hg.1	-0.0413287	0.0783974	0.598213	no	+	7	45002736	MYO1G	Body	Island	7	-	45022627	45026259	45026259		23.523
17	cg11924019	TC15002280.hg.1	-0.0574166	0.109214	0.599215	no	+	15	75019283	CYP1A1	TSS1500	Island	15	+	74683013	74685651	74683013		-336.27
12	cg11207515	TC07001989.hg.1	-0.0535414	0.101993	0.599753	no	-	7	146904205	CNTNAP2	Body	OpenSea	7	-	146778026	146794701	146794701	LOC101928700	-109.504
4	cg18703066	TC02000635.hg.1	0.633449	1.20879	0.600389	no	-	2	105363536			OpenSea	2	+	105149231	105149442	105149231		-214.305
17	cg11924019	TC15001644.hg.1	0.0712262	0.136308	0.601431	no	+	15	75019283	CYP1A1	TSS1500	Island	15	-	74738318	74753529	74753529	UBL7	-265.754
18	cg01664727	TC21000141.hg.1	-0.0778171	0.149638	0.603172	no	+	21	36258423	RUNX1	Body;Body;Body	N_Shore	21	+	36231771	36231871	36231771		-26.652
14	cg13822849	TC09002845.hg.1	-0.0953491	0.183901	0.604257	no	+	9	137999757	OLFM1	Body	S_Shelf	9	-	138096568	138129443	138129443		129.686
17	cg00213123	TC15001651.hg.1	-0.0731945	0.141265	0.604496	no	+	15	75019070	CYP1A1	TSS1500	Island	15	-	75192328	75199462	75199462	FAM219B	180.392
9	cg07105221	TC07000048.hg.1	0.0849617	0.164312	0.605236	no	-	7	4859448	RADIL	Body	S_Shelf	7	+	5219692	5219793	5219692		360.244
17	cg26516004	TC15001643.hg.1	-0.339965	0.658451	0.60577	no	+	15	75019376	CYP1A1	TSS1500	S_Shore	15	-	74701630	74726300	74726300	SEMA7A	-293.076
6	cg11902777	TC05002799.hg.1	0.125001	0.242782	0.606777	no	-	5	368843	AHRR	Body	N_Shore	5	-	602735	612325	612325		243.482
18	cg02869559	TC21000943.hg.1	0.0196474	0.0382614	0.607731	no	+	21	36259067	RUNX1	Body;Body;Body	Island	21	-	36096105	36109478	36109478		-149.589
6	cg11902777	TC05001098.hg.1	0.167644	0.326614	0.607889	no	-	5	368843	AHRR	Body	N_Shore	5	-	602735	612325	612325		243.482
10	cg04180046	TC07001347.hg.1	-0.0692908	0.135201	0.608432	no	+	7	45002736	MYO1G	Body	Island	7	-	44915892	44924966	44924966	PURB;MIR4657	-77.77
17	cg11924019	TC15001652.hg.1	0.091375	0.178374	0.608598	no	+	15	75019283	CYP1A1	TSS1500	Island	15	-	75212132	75230509	75230509	COX5A	211.226
6	cg11902777	TC05002801.hg.1	-0.126379	0.247107	0.60918	no	-	5	368843	AHRR	Body	N_Shore	5	-	710470	767576	767576		398.733
18	cg03142697	TC21000942.hg.1	0.0286157	0.0560596	0.609867	no	+	21	36258497	RUNX1	Body;Body;Body	N_Shore	21	-	36089937	36090503	36090503	CLIC6	-167.994
6	cg11902777	TC05002804.hg.1	0.0866764	0.169988	0.610255	no	-	5	368843	AHRR	Body	N_Shore	5	-	858994	860350	860350		491.507
17	cg12101586	TC15000680.hg.1	-0.0457622	0.0898081	0.610494	no	+	15	75019203	CYP1A1	TSS1500	Island	15	+	74646797	74656961	74646797	LOC729739	-372.406
10	cg04180046	TC07001346.hg.1	-0.0569126	0.112194	0.612096	no	+	7	45002736	MYO1G	Body	Island	7	-	44866390	44887725	44887725	H2AFV	-115.011
18	cg03142697	TC21000940.hg.1	0.0251348	0.0495817	0.612329	no	+	21	36258497	RUNX1	Body;Body;Body	N_Shore	21	-	35821672	35831893	35831893	KCNE1	-426.604
17	cg11924019	TC15002285.hg.1	-0.0620318	0.122562	0.612898	no	+	15	75019283	CYP1A1	TSS1500	Island	15	+	75288945	75289555	75288945		269.662
17	cg22549041	TC15002282.hg.1	0.0313084	0.0618994	0.613131	no	+	15	75019251	CYP1A1	TSS1500	Island	15	+	74779937	74796235	74779937		-239.314
11	cg04598670	TC07003008.hg.1	-0.027135	0.053732	0.613685	no	-	7	68697651			OpenSea	7	-	69057888	69063004	69063004		365.353
8	cg05767720	TC06004081.hg.1	-0.0728847	0.145072	0.615514	no	+	6	32117281	PRRT1	Body	N_Shore	6	+	31981167	31981961	31981167	STK19	-136.114
17	cg11924019	TC15001643.hg.1	-0.0684177	0.137117	0.617927	no	+	15	75019283	CYP1A1	TSS1500	Island	15	-	74701630	74726300	74726300	SEMA7A	-292.983
18	cg03142697	TC21000943.hg.1	0.019621	0.0393636	0.61829	no	+	21	36258497	RUNX1	Body;Body;Body	N_Shore	21	-	36096105	36109478	36109478		-149.019
1	cg18540492	TC01000615.hg.1	0.337379	0.677197	0.618472	no	+	1	50489418	AGBL4	Body	Island	1	+	50791942	50792682	50791942		302.524
4	cg18703066	TC02000634.hg.1	0.282807	0.567924	0.618636	no	-	2	105363536			OpenSea	2	+	105049725	105137290	105049725	LINC01102	-313.811
17	cg18092474	TC15002801.hg.1	0.0283363	0.0569055	0.618644	no	+	15	75019302	CYP1A1	TSS1500	Island	15	+	74900713	74922542	74900713	CLK3	-118.589
6	cg05575921	TC05003402.hg.1	0.0930684	0.187111	0.619037	no	-	5	373378	AHRR	Body	N_Shore	5	-	710472	767323	767323	ZDHHC11B	393.945
17	cg18092474	TC15000689.hg.1	0.0351084	0.0706297	0.619262	no	+	15	75019302	CYP1A1	TSS1500	Island	15	+	75288945	75289555	75288945	SCAMP5	269.643
10	cg22132788	TC07002288.hg.1	0.0639176	0.128616	0.619341	no	+	7	45002486	MYO1G	Body	Island	7	+	45039345	45116069	45039345	CCM2	36.859
10	cg12803068	TC07002284.hg.1	-0.0279858	0.0563362	0.619482	no	+	7	45002919	MYO1G	Body	S_Shore	7	+	44887843	44889231	44887843		-115.076
9	cg07105221	TC07003318.hg.1	0.0349855	0.0705665	0.620177	no	-	7	4859448	RADIL	Body	S_Shelf	7	+	5085452	5112854	5085452	RBAK;RBAK-RBAKDN;RBAKDN	226.004
9	cg07105221	TC07002119.hg.1	-0.0567256	0.114556	0.620603	no	-	7	4859448	RADIL	Body	S_Shelf	7	+	5013616	5037800	5013616	RNF216P1	154.168
8	cg05767720	TC06000394.hg.1	0.0223099	0.0453378	0.622787	no	+	6	32117281	PRRT1	Body	N_Shore	6	+	32121218	32139755	32121218	PPT2;EGFL8;PPT2-EGFL8	3.937
8	cg05767720	TC06000383.hg.1	0.0229804	0.0467818	0.623394	no	+	6	32117281	PRRT1	Body	N_Shore	6	+	31707725	31732628	31707725	SAPCD1;MSH5;MSH5-SAPCD1	-409.556
17	cg22549041	TC15000691.hg.1	0.0478565	0.0974713	0.623566	no	+	15	75019251	CYP1A1	TSS1500	Island	15	+	75491233	75504510	75491233	C15orf39	471.982
9	cg07105221	TC07002768.hg.1	-0.0765275	0.156372	0.624687	no	-	7	4859448	RADIL	Body	S_Shelf	7	-	5160941	5184177	5184177	ZNF890P	324.729
17	cg18092474	TC15000691.hg.1	0.0589216	0.121301	0.62727	no	+	15	75019302	CYP1A1	TSS1500	Island	15	+	75491233	75504510	75491233	C15orf39	471.931
10	cg22132788	TC07002286.hg.1	0.0447679	0.0924913	0.628493	no	+	7	45002486	MYO1G	Body	Island	7	+	45022562	45023645	45022562		20.076
4	cg18703066	TC02003458.hg.1	0.626821	1.29759	0.629173	no	-	2	105363536			OpenSea	2	+	105127003	105128314	105127003		-236.533
6	cg23067299	TC05000004.hg.1	-0.117923	0.245588	0.631232	no	+	5	323907	AHRR	Body	S_Shore	5	+	218356	256815	218356	SDHA	-105.551
16	cg17454592	TC15001178.hg.1	0.138248	0.291068	0.634931	no	-	15	33360353	FMN1	TSS1500	OpenSea	15	-	32892833	32892866	32892866		-467.487
17	cg26516004	TC15000681.hg.1	-0.223206	0.472935	0.637076	no	+	15	75019376	CYP1A1	TSS1500	S_Shore	15	+	74753606	74773633	74753606	UBL7-AS1	-265.77
4	cg18703066	TC02000643.hg.1	-0.298806	0.634157	0.637628	no	-	2	105363536			OpenSea	2	+	105760571	105761882	105760571		397.035
6	cg17924476	TC05000008.hg.1	-0.0543522	0.115667	0.638544	no	+	5	323794	AHRR	Body	S_Shore	5	+	524820	526709	524820		201.026
6	cg23067299	TC05001094.hg.1	-0.218434	0.468014	0.640814	no	+	5	323907	AHRR	Body	S_Shore	5	-	441613	443275	443275	EXOC3-AS1	119.368
6	cg21161138	TC05002802.hg.1	-0.164817	0.353227	0.640902	no	-	5	399360	AHRR	Body	OpenSea	5	-	763495	764229	764229		364.869
6	cg21161138	TC05001093.hg.1	0.119016	0.256056	0.64219	no	-	5	399360	AHRR	Body	OpenSea	5	-	269973	271631	271631		-127.729
10	cg12803068	TC07000275.hg.1	-0.0309552	0.0669491	0.643933	no	+	7	45002919	MYO1G	Body	S_Shore	7	+	44622024	44623271	44622024		-380.895
10	cg12803068	TC07001351.hg.1	0.0133309	0.028946	0.645244	no	+	7	45002919	MYO1G	Body	S_Shore	7	-	45139699	45151646	45151646	TBRG4;SNORA5B	148.727
15	cg15507334	TC10000109.hg.1	0.0665982	0.146049	0.648507	no	+	10	14372913	FRMD4A	TSS200	OpenSea	10	+	14116283	14129604	14116283		-256.63
8	cg05767720	TC06002721.hg.1	-0.0320231	0.0704581	0.649585	no	+	6	32117281	PRRT1	Body	N_Shore	6	+	31973413	31976686	31973413	CYP21A1P	-143.868
6	cg11902777	TC05000002.hg.1	0.0495802	0.109236	0.650029	no	-	5	368843	AHRR	Body	N_Shore	5	+	140373	190087	140373	PLEKHG4B	-228.47
6	cg11902777	TC05002172.hg.1	-0.162526	0.358655	0.650552	no	-	5	368843	AHRR	Body	N_Shore	5	+	195893	196449	195893		-172.95
17	cg22549041	TC15001651.hg.1	-0.0197331	0.0435474	0.650562	no	+	15	75019251	CYP1A1	TSS1500	Island	15	-	75192328	75199462	75199462	FAM219B	180.211
8	cg05767720	TC06000386.hg.1	0.0516489	0.114221	0.651251	no	+	6	32117281	PRRT1	Body	N_Shore	6	+	31802385	31807541	31802385	C6orf48;SNORD52;SNORD48	-314.896
10	cg19089201	TC07001344.hg.1	-0.0392263	0.0871951	0.652919	no	+	7	45002287	MYO1G	3'UTR	Island	7	-	44617493	44621886	44621886	TMED4	-380.401
8	cg05767720	TC06001534.hg.1	-0.0323895	0.0720399	0.653109	no	+	6	32117281	PRRT1	Body	N_Shore	6	-	31629006	31634060	31634060	GPANK1	-483.221
7	cg01876548	TC05000588.hg.1	-0.0779221	0.174588	0.655478	no	-	5	124126863			OpenSea	5	+	124056778	124057382	124056778		-70.085
18	cg00994804	TC21000695.hg.1	-0.0216566	0.0485507	0.655665	no	+	21	36259383	RUNX1	1stExon;1stExon;Body	Island	21	+	36377027	36384582	36377027		117.644
17	cg12101586	TC15001643.hg.1	-0.0411102	0.092734	0.657652	no	+	15	75019203	CYP1A1	TSS1500	Island	15	-	74701630	74726300	74726300	SEMA7A	-292.903
6	cg17924476	TC05001094.hg.1	0.0801623	0.181201	0.658317	no	+	5	323794	AHRR	Body	S_Shore	5	-	441613	443275	443275	EXOC3-AS1	119.481
1	cg18540492	TC01005477.hg.1	-0.178679	0.403945	0.658359	no	+	1	50489418	AGBL4	Body	Island	1	-	50717182	50723876	50723876		234.458
10	cg04180046	TC07002923.hg.1	0.0900497	0.203653	0.658477	no	+	7	45002736	MYO1G	Body	Island	7	-	44915900	44918584	44918584	PURB	-84.152
18	cg03142697	TC21000424.hg.1	-0.0390964	0.0890814	0.660856	no	+	21	36258497	RUNX1	Body;Body;Body	N_Shore	21	-	36195761	36198703	36198703		-59.794
17	cg17852385	TC15000680.hg.1	-0.0524669	0.120362	0.663013	no	+	15	75019188	CYP1A1	TSS1500	Island	15	+	74646797	74656961	74646797	LOC729739	-372.391
15	cg15507334	TC10001055.hg.1	0.0918103	0.210687	0.663116	no	+	10	14372913	FRMD4A	TSS200	OpenSea	10	-	14705394	14705493	14705493		332.58
10	cg19089201	TC07000277.hg.1	0.025009	0.0579027	0.665913	no	+	7	45002287	MYO1G	3'UTR	Island	7	+	44788180	44810735	44788180	ZMIZ2	-214.107
17	cg00213123	TC15001644.hg.1	-0.102806	0.238723	0.666832	no	+	15	75019070	CYP1A1	TSS1500	Island	15	-	74738318	74753529	74753529	UBL7	-265.541
17	cg05549655	TC15001644.hg.1	0.0657065	0.152616	0.666916	no	+	15	75019143	CYP1A1	TSS1500	Island	15	-	74738318	74753529	74753529	UBL7	-265.614
6	cg21161138	TC05002800.hg.1	0.224815	0.525731	0.669033	no	-	5	399360	AHRR	Body	OpenSea	5	-	654144	654462	654462		255.102
10	cg04180046	TC07001342.hg.1	-0.0137764	0.0323565	0.670383	no	+	7	45002736	MYO1G	Body	Island	7	-	44552134	44580914	44580914	NPC1L1	-421.822
17	cg18092474	TC15001642.hg.1	0.0120547	0.0284999	0.672421	no	+	15	75019302	CYP1A1	TSS1500	Island	15	-	74630100	74660081	74660081	CYP11A1	-359.221
8	cg05767720	TC06001564.hg.1	0.0141009	0.0333471	0.672508	no	+	6	32117281	PRRT1	Body	N_Shore	6	-	32162620	32191844	32191844	NOTCH4	74.563
14	cg13822849	TC09001713.hg.1	-0.0371723	0.087913	0.672525	no	+	9	137999757	OLFM1	Body	S_Shelf	9	-	138354565	138364095	138364095	PPP1R26-AS1	364.338
17	cg26516004	TC15002281.hg.1	0.214923	0.508478	0.672636	no	+	15	75019376	CYP1A1	TSS1500	S_Shore	15	+	74753606	74773633	74753606	UBL7-AS1	-265.77
14	cg13822849	TC09001711.hg.1	-0.0788815	0.1868	0.672929	no	+	9	137999757	OLFM1	Body	S_Shelf	9	-	138096568	138129443	138129443		129.686
17	cg12101586	TC15002283.hg.1	0.05225	0.123764	0.673003	no	+	15	75019203	CYP1A1	TSS1500	Island	15	+	74800497	74806312	74800497		-218.706
14	cg13822849	TC09000797.hg.1	0.0577091	0.13673	0.673082	no	+	9	137999757	OLFM1	Body	S_Shelf	9	+	138413284	138418386	138413284	LCN1	413.527
17	cg12101586	TC15001646.hg.1	0.0309616	0.0733625	0.673104	no	+	15	75019203	CYP1A1	TSS1500	Island	15	-	74922899	74988386	74988386	EDC3	-30.817
6	cg11902777	TC05000007.hg.1	0.100534	0.238289	0.673205	no	-	5	368843	AHRR	Body	N_Shore	5	+	478238	480999	478238	LOC100288152	109.395
14	cg13822849	TC09000786.hg.1	0.0754976	0.17988	0.674803	no	+	9	137999757	OLFM1	Body	S_Shelf	9	+	137519676	137521252	137519676		-480.081
17	cg17852385	TC15001643.hg.1	-0.0519052	0.12428	0.67631	no	+	15	75019188	CYP1A1	TSS1500	Island	15	-	74701630	74726300	74726300	SEMA7A	-292.888
18	cg00994804	TC21000422.hg.1	0.0133356	0.0322	0.678868	no	+	21	36259383	RUNX1	1stExon;1stExon;Body	Island	21	-	36096105	36109478	36109478	LINC00160	-149.905
14	cg13822849	TC09002336.hg.1	0.0750294	0.181191	0.678912	no	+	9	137999757	OLFM1	Body	S_Shelf	9	+	137519676	137521252	137519676		-480.081
18	cg00994804	TC21000424.hg.1	0.029901	0.0722286	0.678994	no	+	21	36259383	RUNX1	1stExon;1stExon;Body	Island	21	-	36195761	36198703	36198703		-60.68
6	cg11902777	TC05001095.hg.1	-0.0706213	0.171464	0.680537	no	-	5	368843	AHRR	Body	N_Shore	5	-	466239	473213	473213	PP7080	104.37
15	cg11813497	TC10000108.hg.1	-0.0681517	0.166088	0.681663	no	+	10	14372879	FRMD4A	TSS200	OpenSea	10	+	14033815	14049525	14033815		-339.064
15	cg25464840	TC10001053.hg.1	0.0308446	0.075319	0.682261	no	+	10	14372910	FRMD4A	TSS200	OpenSea	10	-	13685706	14504143	14504143	FRMD4A	131.233
4	cg18703066	TC02002159.hg.1	-0.546796	1.33837	0.682969	no	-	2	105363536			OpenSea	2	-	105185275	105185378	105185378		-178.158
15	cg25464840	TC10002479.hg.1	0.100185	0.245612	0.683451	no	+	10	14372910	FRMD4A	TSS200	OpenSea	10	-	14566482	14569859	14569859		196.949
15	cg20344448	TC10001055.hg.1	-0.0931884	0.229397	0.684674	no	+	10	14372431	FRMD4A	5'UTR	OpenSea	10	-	14705394	14705493	14705493		333.062
17	cg00213123	TC15000686.hg.1	0.0228376	0.0565483	0.686416	no	+	15	75019070	CYP1A1	TSS1500	Island	15	+	75105057	75124143	75105057	CPLX3;LMAN1L	85.987
13	cg17199018	TC08001091.hg.1	0.0609267	0.15201	0.688661	no	-	8	28206278	ZNF395	Body	OpenSea	8	-	28273041	28277572	28277572		71.294
6	cg05575921	TC05002174.hg.1	-0.0830375	0.207349	0.688908	no	-	5	373378	AHRR	Body	N_Shore	5	+	524820	526709	524820		151.442
6	cg21161138	TC05000004.hg.1	0.0663079	0.165675	0.689088	no	-	5	399360	AHRR	Body	OpenSea	5	+	218356	256815	218356	SDHA	-181.004
6	cg23067299	TC05001098.hg.1	0.141162	0.352913	0.689264	no	+	5	323907	AHRR	Body	S_Shore	5	-	602735	612325	612325		288.418
17	cg11924019	TC15001656.hg.1	-0.0419099	0.105047	0.690019	no	+	15	75019283	CYP1A1	TSS1500	Island	15	-	75413877	75414007	75414007		394.724
10	cg04180046	TC07001351.hg.1	0.0193555	0.0490929	0.693485	no	+	7	45002736	MYO1G	Body	Island	7	-	45139699	45151646	45151646	TBRG4;SNORA5B	148.91
13	cg17199018	TC08002266.hg.1	0.020733	0.0526182	0.693659	no	-	8	28206278	ZNF395	Body	OpenSea	8	-	28536529	28558981	28558981	EXTL3-AS1	352.703
8	cg05767720	TC06000391.hg.1	0.017576	0.0448192	0.695042	no	+	6	32117281	PRRT1	Body	N_Shore	6	+	31973359	31976712	31973359	CYP21A2;CYP21A1P	-143.922
10	cg22132788	TC07002925.hg.1	-0.0275359	0.0707438	0.6972	no	+	7	45002486	MYO1G	Body	Island	7	-	45022627	45026259	45026259		23.773
6	cg17924476	TC05001096.hg.1	0.0154823	0.0398694	0.697872	no	+	5	323794	AHRR	Body	S_Shore	5	-	473334	524549	524549	SLC9A3	200.755
2	cg25189904	TC01002763.hg.1	-0.162241	0.418702	0.698494	no	-	1	68299493	GNG12	TSS1500	S_Shore	1	-	68564142	68698420	68698420	WLS	398.927
6	cg21161138	TC05002796.hg.1	-0.0736882	0.190505	0.698997	no	-	5	399360	AHRR	Body	OpenSea	5	-	470626	473178	473178	PP7080	73.818
10	cg04180046	TC07000277.hg.1	0.0248208	0.0643291	0.69971	no	+	7	45002736	MYO1G	Body	Island	7	+	44788180	44810735	44788180	ZMIZ2	-214.556
17	cg11924019	TC15002282.hg.1	0.0441251	0.11467	0.700481	no	+	15	75019283	CYP1A1	TSS1500	Island	15	+	74779937	74796235	74779937		-239.346
17	cg00213123	TC15002801.hg.1	0.0568695	0.148348	0.701554	no	+	15	75019070	CYP1A1	TSS1500	Island	15	+	74900713	74922542	74900713	CLK3	-118.357
10	cg19089201	TC07002287.hg.1	-0.0513094	0.133884	0.701639	no	+	7	45002287	MYO1G	3'UTR	Island	7	+	45034628	45038116	45034628		32.341
6	cg21161138	TC05002794.hg.1	-0.097905	0.255678	0.701872	no	-	5	399360	AHRR	Body	OpenSea	5	-	269973	271631	271631		-127.729
18	cg02869559	TC21000140.hg.1	-0.0123046	0.0321641	0.702143	no	+	21	36259067	RUNX1	Body;Body;Body	Island	21	+	36118054	36157183	36118054	LINC01426	-141.013
10	cg19089201	TC07001347.hg.1	0.0464761	0.121705	0.70265	no	+	7	45002287	MYO1G	3'UTR	Island	7	-	44915892	44924966	44924966	PURB;MIR4657	-77.321
10	cg04180046	TC07002283.hg.1	-0.0451919	0.11865	0.703384	no	+	7	45002736	MYO1G	Body	Island	7	+	44622024	44623270	44622024		-380.712
1	cg18540492	TC01005479.hg.1	0.142322	0.374722	0.704183	no	+	1	50489418	AGBL4	Body	Island	1	-	50782665	50786833	50786833		297.415
6	cg05575921	TC05002800.hg.1	-0.22033	0.580139	0.704197	no	-	5	373378	AHRR	Body	N_Shore	5	-	654144	654462	654462		281.084
17	cg18092474	TC15002624.hg.1	0.0346408	0.0912254	0.704242	no	+	15	75019302	CYP1A1	TSS1500	Island	15	-	74631628	74636162	74636162	CYP11A1	-383.14
10	cg12803068	TC07002286.hg.1	0.0228872	0.060444	0.705041	no	+	7	45002919	MYO1G	Body	S_Shore	7	+	45022562	45023645	45022562		19.643
17	cg26516004	TC15001647.hg.1	0.0824925	0.217861	0.705044	no	+	15	75019376	CYP1A1	TSS1500	S_Shore	15	-	75011883	75017951	75017951	CYP1A1	-1.425
10	cg22132788	TC07001347.hg.1	-0.0461681	0.122001	0.705211	no	+	7	45002486	MYO1G	Body	Island	7	-	44915892	44924966	44924966	PURB;MIR4657	-77.52
10	cg22132788	TC07001351.hg.1	0.0166784	0.0442973	0.70663	no	+	7	45002486	MYO1G	Body	Island	7	-	45139699	45151646	45151646	TBRG4;SNORA5B	149.16
4	cg18703066	TC02000642.hg.1	0.394977	1.04935	0.706711	no	-	2	105363536			OpenSea	2	+	105654441	105716418	105654441	MRPS9	290.905
17	cg17852385	TC15002282.hg.1	0.0390812	0.10393	0.706985	no	+	15	75019188	CYP1A1	TSS1500	Island	15	+	74779937	74796235	74779937		-239.251
17	cg17852385	TC15001646.hg.1	0.0369544	0.0983196	0.707114	no	+	15	75019188	CYP1A1	TSS1500	Island	15	-	74922899	74988386	74988386	EDC3	-30.802
6	cg21161138	TC05002797.hg.1	-0.0506564	0.136414	0.710475	no	-	5	399360	AHRR	Body	OpenSea	5	-	477487	483482	483482	SLC9A3	84.122
17	cg18092474	TC15002285.hg.1	-0.0305121	0.0823443	0.71107	no	+	15	75019302	CYP1A1	TSS1500	Island	15	+	75288945	75289555	75288945		269.643
17	cg11924019	TC15000690.hg.1	0.0467383	0.126212	0.711239	no	+	15	75019283	CYP1A1	TSS1500	Island	15	+	75315896	75343067	75315896	PPCDC	296.613
15	cg11813497	TC10001054.hg.1	0.0435864	0.117828	0.711536	no	+	10	14372879	FRMD4A	TSS200	OpenSea	10	-	14560556	14816896	14816896	FAM107B	444.017
10	cg12803068	TC07002287.hg.1	-0.0324166	0.0877031	0.711759	no	+	7	45002919	MYO1G	Body	S_Shore	7	+	45034628	45038116	45034628		31.709
17	cg05549655	TC15001645.hg.1	-0.0603567	0.163625	0.712314	no	+	15	75019143	CYP1A1	TSS1500	Island	15	-	74783299	74783372	74783372		-235.771
17	cg13570656	TC15002282.hg.1	0.0248699	0.0674763	0.712538	no	+	15	75019196	CYP1A1	TSS1500	Island	15	+	74779937	74796235	74779937		-239.259
6	cg17924476	TC05003402.hg.1	0.0358631	0.097327	0.712606	no	+	5	323794	AHRR	Body	S_Shore	5	-	710472	767323	767323	ZDHHC11B	443.529
17	cg05549655	TC15000684.hg.1	0.0296301	0.0807257	0.713675	no	+	15	75019143	CYP1A1	TSS1500	Island	15	+	75041184	75048941	75041184	CYP1A2	22.041
18	cg02869559	TC21000422.hg.1	0.0141352	0.0386028	0.714329	no	+	21	36259067	RUNX1	Body;Body;Body	Island	21	-	36096105	36109478	36109478	LINC00160	-149.589
10	cg12803068	TC07001346.hg.1	-0.0241394	0.0661584	0.715296	no	+	7	45002919	MYO1G	Body	S_Shore	7	-	44866390	44887725	44887725	H2AFV	-115.194
11	cg04598670	TC07003005.hg.1	-0.0442786	0.123017	0.718981	no	-	7	68697651			OpenSea	7	-	68652820	68654305	68654305		-43.346
17	cg22549041	TC15000682.hg.1	0.0146466	0.040985	0.720907	no	+	15	75019251	CYP1A1	TSS1500	Island	15	+	74833518	74890472	74833518	ARID3B	-185.733
17	cg22549041	TC15002280.hg.1	-0.0209774	0.058963	0.722099	no	+	15	75019251	CYP1A1	TSS1500	Island	15	+	74683013	74685651	74683013		-336.238
14	cg13822849	TC09002341.hg.1	0.0681727	0.193009	0.724018	no	+	9	137999757	OLFM1	Body	S_Shelf	9	+	138023133	138027186	138023133		23.376
11	cg04598670	TC07000424.hg.1	0.0363871	0.103679	0.725704	no	-	7	68697651			OpenSea	7	+	69063905	70258054	69063905	AUTS2	366.254
15	cg15507334	TC10001913.hg.1	-0.0518319	0.147711	0.725749	no	+	10	14372913	FRMD4A	TSS200	OpenSea	10	+	14116287	14129880	14116287	LOC101928453	-256.626
10	cg19089201	TC07002284.hg.1	-0.0301516	0.0860072	0.725997	no	+	7	45002287	MYO1G	3'UTR	Island	7	+	44887843	44889231	44887843		-114.444
8	cg05767720	TC06004080.hg.1	0.0114901	0.0327948	0.726152	no	+	6	32117281	PRRT1	Body	N_Shore	6	+	31982539	32003195	31982539	C4B;C4B_2;C4A	-134.742
17	cg18092474	TC15001644.hg.1	-0.0320575	0.0915817	0.726392	no	+	15	75019302	CYP1A1	TSS1500	Island	15	-	74738318	74753529	74753529	UBL7	-265.773
6	cg05575921	TC05002173.hg.1	0.0822707	0.235496	0.726912	no	-	5	373378	AHRR	Body	N_Shore	5	+	468367	472052	468367		94.989
6	cg23067299	TC05000002.hg.1	-0.0412004	0.11803	0.727125	no	+	5	323907	AHRR	Body	S_Shore	5	+	140373	190087	140373	PLEKHG4B	-183.534
17	cg22549041	TC15002624.hg.1	0.0254612	0.0733056	0.72843	no	+	15	75019251	CYP1A1	TSS1500	Island	15	-	74631628	74636162	74636162	CYP11A1	-383.089
16	cg17454592	TC15002473.hg.1	-0.0407548	0.118915	0.731892	no	-	15	33360353	FMN1	TSS1500	OpenSea	15	-	33527517	33540604	33540604		180.251
17	cg13570656	TC15002283.hg.1	0.0366276	0.10769	0.733848	no	+	15	75019196	CYP1A1	TSS1500	Island	15	+	74800497	74806312	74800497		-218.699
4	cg18703066	TC02004463.hg.1	-0.459578	1.37537	0.738349	no	-	2	105363536			OpenSea	2	-	105323070	105323964	105323964		-39.572
8	cg05767720	TC06004120.hg.1	0.00908919	0.0274396	0.740542	no	+	6	32117281	PRRT1	Body	N_Shore	6	-	32008931	32077151	32077151	TNXB	-40.13
17	cg17852385	TC15000686.hg.1	-0.00968376	0.0292666	0.740816	no	+	15	75019188	CYP1A1	TSS1500	Island	15	+	75105057	75124143	75105057	CPLX3;LMAN1L	85.869
14	cg13822849	TC09001717.hg.1	-0.112668	0.342017	0.741918	no	+	9	137999757	OLFM1	Body	S_Shelf	9	-	138420457	138420546	138420546		420.789
18	cg01664727	TC21000424.hg.1	-0.0360081	0.109954	0.743384	no	+	21	36258423	RUNX1	Body;Body;Body	N_Shore	21	-	36195761	36198703	36198703		-59.72
11	cg04598670	TC07001476.hg.1	0.0393592	0.120252	0.743517	no	-	7	68697651			OpenSea	7	-	68652820	68654305	68654305		-43.346
15	cg11813497	TC10002479.hg.1	0.0775764	0.23855	0.745109	no	+	10	14372879	FRMD4A	TSS200	OpenSea	10	-	14566482	14569859	14569859		196.98
17	cg11924019	TC15000682.hg.1	0.0246061	0.0759218	0.745943	no	+	15	75019283	CYP1A1	TSS1500	Island	15	+	74833518	74890472	74833518	ARID3B	-185.765
18	cg00994804	TC21000943.hg.1	0.0103391	0.0319189	0.746079	no	+	21	36259383	RUNX1	1stExon;1stExon;Body	Island	21	-	36096105	36109478	36109478		-149.905
6	cg21161138	TC05002174.hg.1	-0.0603451	0.187913	0.748188	no	-	5	399360	AHRR	Body	OpenSea	5	+	524820	526709	524820		125.46
10	cg22132788	TC07002923.hg.1	0.0587083	0.183768	0.749449	no	+	7	45002486	MYO1G	Body	Island	7	-	44915900	44918584	44918584	PURB	-83.902
17	cg05549655	TC15002624.hg.1	-0.0482897	0.152032	0.750844	no	+	15	75019143	CYP1A1	TSS1500	Island	15	-	74631628	74636162	74636162	CYP11A1	-382.981
6	cg05575921	TC05002171.hg.1	-0.0589394	0.185874	0.751251	no	-	5	373378	AHRR	Body	N_Shore	5	+	92264	139978	92264		-281.114
10	cg04180046	TC07000281.hg.1	0.0231209	0.073218	0.752245	no	+	7	45002736	MYO1G	Body	Island	7	+	45197367	45225901	45197367	RAMP3	194.631
17	cg05549655	TC15001646.hg.1	0.0380952	0.121456	0.753859	no	+	15	75019143	CYP1A1	TSS1500	Island	15	-	74922899	74988386	74988386	EDC3	-30.757
18	cg01664727	TC21000140.hg.1	-0.0127514	0.0408429	0.754961	no	+	21	36258423	RUNX1	Body;Body;Body	N_Shore	21	+	36118054	36157183	36118054	LINC01426	-140.369
13	cg17199018	TC08001853.hg.1	-0.0559189	0.180167	0.756352	no	-	8	28206278	ZNF395	Body	OpenSea	8	+	28428149	28431777	28428149		221.871
10	cg22132788	TC07001344.hg.1	-0.0270296	0.0874124	0.75723	no	+	7	45002486	MYO1G	Body	Island	7	-	44617493	44621886	44621886	TMED4	-380.6
6	cg17924476	TC05000004.hg.1	0.0293704	0.0950908	0.757498	no	+	5	323794	AHRR	Body	S_Shore	5	+	218356	256815	218356	SDHA	-105.438
17	cg13570656	TC15000691.hg.1	0.0328156	0.106255	0.757519	no	+	15	75019196	CYP1A1	TSS1500	Island	15	+	75491233	75504510	75491233	C15orf39	472.037
12	cg25949550	TC07001985.hg.1	0.133183	0.432551	0.758232	no	-	7	145814306	CNTNAP2	Body	S_Shore	7	-	145372975	145378462	145378462		-435.844
10	cg19089201	TC07002925.hg.1	-0.0216778	0.0705747	0.758796	no	+	7	45002287	MYO1G	3'UTR	Island	7	-	45022627	45026259	45026259		23.972
17	cg12101586	TC15001642.hg.1	0.00880602	0.0286913	0.758976	no	+	15	75019203	CYP1A1	TSS1500	Island	15	-	74630100	74660081	74660081	CYP11A1	-359.122
6	cg23067299	TC05002173.hg.1	-0.0968435	0.316373	0.759599	no	+	5	323907	AHRR	Body	S_Shore	5	+	468367	472052	468367		144.46
17	cg13570656	TC15001642.hg.1	-0.0076164	0.024964	0.760368	no	+	15	75019196	CYP1A1	TSS1500	Island	15	-	74630100	74660081	74660081	CYP11A1	-359.115
17	cg11924019	TC15001651.hg.1	-0.0244497	0.0806728	0.761909	no	+	15	75019283	CYP1A1	TSS1500	Island	15	-	75192328	75199462	75199462	FAM219B	180.179
13	cg17199018	TC08001854.hg.1	0.0270393	0.0913154	0.767219	no	-	8	28206278	ZNF395	Body	OpenSea	8	+	28480295	28556150	28480295		274.017
6	cg23067299	TC05002794.hg.1	0.112114	0.379031	0.767461	no	+	5	323907	AHRR	Body	S_Shore	5	-	269973	271631	271631		-52.276
10	cg12803068	TC07001344.hg.1	-0.0164749	0.0571223	0.7731	no	+	7	45002919	MYO1G	Body	S_Shore	7	-	44617493	44621886	44621886	TMED4	-381.033
1	cg18540492	TC01000616.hg.1	0.106603	0.372974	0.775086	no	+	1	50489418	AGBL4	Body	Island	1	+	50927141	50936822	50927141		437.723
9	cg07105221	TC07000049.hg.1	0.0217464	0.0762936	0.775686	no	-	7	4859448	RADIL	Body	S_Shelf	7	+	5229819	5273486	5229819	WIPI2	370.371
8	cg05767720	TC06001540.hg.1	0.0447912	0.15771	0.776471	no	+	6	32117281	PRRT1	Body	N_Shore	6	-	31724728	31724830	31724830		-392.451
6	cg11902777	TC05002802.hg.1	0.137125	0.484673	0.777305	no	-	5	368843	AHRR	Body	N_Shore	5	-	763495	764229	764229		395.386
6	cg21161138	TC05001096.hg.1	0.0196396	0.0694693	0.777469	no	-	5	399360	AHRR	Body	OpenSea	5	-	473334	524549	524549	SLC9A3	125.189
6	cg05575921	TC05002801.hg.1	0.0555336	0.19876	0.780005	no	-	5	373378	AHRR	Body	N_Shore	5	-	710470	767576	767576		394.198
11	cg04598670	TC07002393.hg.1	-0.0335165	0.120149	0.780344	no	-	7	68697651			OpenSea	7	+	68505139	68511790	68505139		-192.512
18	cg00994804	TC21000419.hg.1	0.0093916	0.0343294	0.784479	no	+	21	36259383	RUNX1	1stExon;1stExon;Body	Island	21	-	35828408	35828535	35828535		-430.848
17	cg17852385	TC15000690.hg.1	-0.0310051	0.114395	0.786429	no	+	15	75019188	CYP1A1	TSS1500	Island	15	+	75315896	75343067	75315896	PPCDC	296.708
2	cg25189904	TC01000746.hg.1	0.0144949	0.0538013	0.787676	no	-	1	68299493	GNG12	TSS1500	S_Shore	1	+	68297971	68668670	68297971	GNG12-AS1	-1.522
14	cg13822849	TC09002339.hg.1	0.0667922	0.248059	0.787795	no	+	9	137999757	OLFM1	Body	S_Shelf	9	+	137828997	137835041	137828997		-170.76
17	cg11924019	TC15000691.hg.1	0.0486206	0.180574	0.787798	no	+	15	75019283	CYP1A1	TSS1500	Island	15	+	75491233	75504510	75491233	C15orf39	471.95
17	cg00213123	TC15001645.hg.1	0.0689007	0.255953	0.787846	no	+	15	75019070	CYP1A1	TSS1500	Island	15	-	74783299	74783372	74783372		-235.698
17	cg26516004	TC15002625.hg.1	0.128694	0.479685	0.788541	no	+	15	75019376	CYP1A1	TSS1500	S_Shore	15	-	75515790	75516799	75516799		497.423
17	cg22549041	TC15001656.hg.1	-0.0152092	0.0567112	0.78862	no	+	15	75019251	CYP1A1	TSS1500	Island	15	-	75413877	75414007	75414007		394.756
17	cg13570656	TC15001646.hg.1	0.0170847	0.063836	0.789046	no	+	15	75019196	CYP1A1	TSS1500	Island	15	-	74922899	74988386	74988386	EDC3	-30.81
8	cg05767720	TC06001552.hg.1	0.0139003	0.0519993	0.78929	no	+	6	32117281	PRRT1	Body	N_Shore	6	-	31919864	31926887	31926887	NELFE;MIR1236	-190.394
17	cg05549655	TC15001643.hg.1	-0.0410374	0.15353	0.789309	no	+	15	75019143	CYP1A1	TSS1500	Island	15	-	74701630	74726300	74726300	SEMA7A	-292.843
18	cg01664727	TC21000943.hg.1	0.0129686	0.0485896	0.78961	no	+	21	36258423	RUNX1	Body;Body;Body	N_Shore	21	-	36096105	36109478	36109478		-148.945
6	cg11902777	TC05001091.hg.1	0.18781	0.703712	0.789622	no	-	5	368843	AHRR	Body	N_Shore	5	-	144202	144312	144312		-224.531
17	cg12101586	TC15000686.hg.1	-0.00581448	0.0218387	0.790113	no	+	15	75019203	CYP1A1	TSS1500	Island	15	+	75105057	75124143	75105057	CPLX3;LMAN1L	85.854
6	cg05575921	TC05001099.hg.1	0.0386189	0.146638	0.792335	no	-	5	373378	AHRR	Body	N_Shore	5	-	659977	693510	693510	TPPP	320.132
6	cg21161138	TC05002799.hg.1	0.0465263	0.176972	0.79269	no	-	5	399360	AHRR	Body	OpenSea	5	-	602735	612325	612325		212.965
9	cg07105221	TC07002120.hg.1	0.02198	0.0839835	0.793601	no	-	7	4859448	RADIL	Body	S_Shelf	7	+	5111691	5112854	5111691	RBAKDN	252.243
10	cg22132788	TC07001346.hg.1	-0.0264955	0.101244	0.793617	no	+	7	45002486	MYO1G	Body	Island	7	-	44866390	44887725	44887725	H2AFV	-114.761
16	cg17454592	TC15001185.hg.1	0.0372783	0.144046	0.795856	no	-	15	33360353	FMN1	TSS1500	OpenSea	15	-	33527753	33539756	33539756	TMCO5B	179.403
6	cg05575921	TC05002176.hg.1	0.0322397	0.125796	0.797792	no	-	5	373378	AHRR	Body	N_Shore	5	+	693675	785956	693675		320.297
10	cg04180046	TC07000275.hg.1	-0.0289962	0.113553	0.798511	no	+	7	45002736	MYO1G	Body	Island	7	+	44622024	44623271	44622024		-380.712
8	cg05767720	TC06004116.hg.1	0.0155736	0.0611036	0.798883	no	+	6	32117281	PRRT1	Body	N_Shore	6	-	31654726	31671221	31671221	ABHD16A	-446.06
13	cg17199018	TC08002615.hg.1	0.0182858	0.0718875	0.799273	no	-	8	28206278	ZNF395	Body	OpenSea	8	-	28285925	28347835	28347835	FBXO16	141.557
17	cg13570656	TC15000681.hg.1	-0.0146836	0.0579568	0.800055	no	+	15	75019196	CYP1A1	TSS1500	Island	15	+	74753606	74773633	74753606	UBL7-AS1	-265.59
14	cg13822849	TC09000795.hg.1	-0.0286613	0.113157	0.800107	no	+	9	137999757	OLFM1	Body	S_Shelf	9	+	138371648	138380739	138371648	PPP1R26	371.891
17	cg00213123	TC15002624.hg.1	-0.0595855	0.237815	0.802219	no	+	15	75019070	CYP1A1	TSS1500	Island	15	-	74631628	74636162	74636162	CYP11A1	-382.908
6	cg23067299	TC05001093.hg.1	0.094072	0.379614	0.804341	no	+	5	323907	AHRR	Body	S_Shore	5	-	269973	271631	271631		-52.276
10	cg12803068	TC07001347.hg.1	-0.0196957	0.0797288	0.804941	no	+	7	45002919	MYO1G	Body	S_Shore	7	-	44915892	44924966	44924966	PURB;MIR4657	-77.953
4	cg18703066	TC02003465.hg.1	0.272006	1.10577	0.805751	no	-	2	105363536			OpenSea	2	+	105720871	105721924	105720871		357.335
2	cg25189904	TC01002762.hg.1	0.0143746	0.0585901	0.80625	no	-	1	68299493	GNG12	TSS1500	S_Shore	1	-	68511645	68517314	68517314	DIRAS3	217.821
18	cg03142697	TC21000419.hg.1	0.0103169	0.0423403	0.807548	no	+	21	36258497	RUNX1	Body;Body;Body	N_Shore	21	-	35828408	35828535	35828535		-429.962
17	cg05549655	TC15002282.hg.1	0.0312702	0.12839	0.807632	no	+	15	75019143	CYP1A1	TSS1500	Island	15	+	74779937	74796235	74779937		-239.206
17	cg13570656	TC15002285.hg.1	-0.017536	0.0721279	0.807968	no	+	15	75019196	CYP1A1	TSS1500	Island	15	+	75288945	75289555	75288945		269.749
17	cg13570656	TC15000686.hg.1	-0.00458995	0.0190018	0.809184	no	+	15	75019196	CYP1A1	TSS1500	Island	15	+	75105057	75124143	75105057	CPLX3;LMAN1L	85.861
15	cg25464840	TC10001913.hg.1	0.0345569	0.143714	0.810034	no	+	10	14372910	FRMD4A	TSS200	OpenSea	10	+	14116287	14129880	14116287	LOC101928453	-256.623
7	cg01876548	TC05001729.hg.1	0.0379113	0.160577	0.813416	no	-	5	124126863			OpenSea	5	-	123795605	123796242	123796242		-330.621
10	cg19089201	TC07002283.hg.1	-0.025166	0.106805	0.813779	no	+	7	45002287	MYO1G	3'UTR	Island	7	+	44622024	44623270	44622024		-380.263
11	cg04598670	TC07000420.hg.1	0.0556281	0.236175	0.813848	no	-	7	68697651			OpenSea	7	+	68527371	68527457	68527371		-170.28
18	cg02869559	TC21000419.hg.1	0.00957072	0.0411553	0.816165	no	+	21	36259067	RUNX1	Body;Body;Body	Island	21	-	35828408	35828535	35828535		-430.532
17	cg13570656	TC15001643.hg.1	-0.0186445	0.0806937	0.81733	no	+	15	75019196	CYP1A1	TSS1500	Island	15	-	74701630	74726300	74726300	SEMA7A	-292.896
6	cg11902777	TC05001094.hg.1	0.100025	0.433205	0.817451	no	-	5	368843	AHRR	Body	N_Shore	5	-	441613	443275	443275	EXOC3-AS1	74.432
17	cg22549041	TC15001646.hg.1	-0.0134681	0.0585647	0.81817	no	+	15	75019251	CYP1A1	TSS1500	Island	15	-	74922899	74988386	74988386	EDC3	-30.865
17	cg18092474	TC15000690.hg.1	-0.0194653	0.0847951	0.818491	no	+	15	75019302	CYP1A1	TSS1500	Island	15	+	75315896	75343067	75315896	PPCDC	296.594
10	cg22132788	TC07002290.hg.1	-0.0253074	0.110751	0.819306	no	+	7	45002486	MYO1G	Body	Island	7	+	45241393	45243749	45241393		238.907
10	cg22132788	TC07000277.hg.1	0.0132517	0.058048	0.819476	no	+	7	45002486	MYO1G	Body	Island	7	+	44788180	44810735	44788180	ZMIZ2	-214.306
16	cg17454592	TC15001183.hg.1	0.194644	0.854075	0.819778	no	-	15	33360353	FMN1	TSS1500	OpenSea	15	-	33057747	33486897	33486897	FMN1	126.544
4	cg18703066	TC02000638.hg.1	0.276406	1.2306	0.822335	no	-	2	105363536			OpenSea	2	+	105281897	105283314	105281897		-81.639
6	cg11902777	TC05000009.hg.1	0.0329725	0.146868	0.822419	no	-	5	368843	AHRR	Body	N_Shore	5	+	612387	667283	612387	CEP72	243.544
6	cg23067299	TC05002793.hg.1	0.103617	0.463516	0.823165	no	+	5	323907	AHRR	Body	S_Shore	5	-	214013	217394	217394		-106.513
10	cg22132788	TC07002287.hg.1	0.0299915	0.134217	0.823235	no	+	7	45002486	MYO1G	Body	Island	7	+	45034628	45038116	45034628		32.142
17	cg26516004	TC15000682.hg.1	-0.0810803	0.3646	0.82407	no	+	15	75019376	CYP1A1	TSS1500	S_Shore	15	+	74833518	74890472	74833518	ARID3B	-185.858
17	cg00213123	TC15000681.hg.1	-0.0381336	0.172489	0.825084	no	+	15	75019070	CYP1A1	TSS1500	Island	15	+	74753606	74773633	74753606	UBL7-AS1	-265.464
17	cg00213123	TC15002283.hg.1	-0.0707929	0.320511	0.825242	no	+	15	75019070	CYP1A1	TSS1500	Island	15	+	74800497	74806312	74800497		-218.573
6	cg05575921	TC05001094.hg.1	-0.0755534	0.348413	0.828377	no	-	5	373378	AHRR	Body	N_Shore	5	-	441613	443275	443275	EXOC3-AS1	69.897
7	cg01876548	TC05002602.hg.1	0.0270591	0.125014	0.828689	no	-	5	124126863			OpenSea	5	+	124372381	124486527	124372381		245.518
6	cg23067299	TC05000009.hg.1	0.0343327	0.158685	0.82876	no	+	5	323907	AHRR	Body	S_Shore	5	+	612387	667283	612387	CEP72	288.48
6	cg17924476	TC05002793.hg.1	0.0383972	0.179458	0.830628	no	+	5	323794	AHRR	Body	S_Shore	5	-	214013	217394	217394		-106.4
6	cg23067299	TC05002800.hg.1	-0.165887	0.779409	0.831505	no	+	5	323907	AHRR	Body	S_Shore	5	-	654144	654462	654462		330.555
15	cg15507334	TC10001053.hg.1	0.0163879	0.0774222	0.832415	no	+	10	14372913	FRMD4A	TSS200	OpenSea	10	-	13685706	14504143	14504143	FRMD4A	131.23
10	cg12803068	TC07000279.hg.1	-0.010494	0.0498046	0.833169	no	+	7	45002919	MYO1G	Body	S_Shore	7	+	44888015	44889167	44888015		-114.904
3	cg14179389	TC01004529.hg.1	-0.0282353	0.134159	0.833358	no	-	1	92947961	GFI1	Body;Body;Body	Island	1	+	92864531	92867614	92864531		-83.43
6	cg11902777	TC05002795.hg.1	-0.0661685	0.318803	0.835627	no	-	5	368843	AHRR	Body	N_Shore	5	-	414939	417808	417808		48.965
10	cg19089201	TC07000275.hg.1	-0.0211342	0.102213	0.836241	no	+	7	45002287	MYO1G	3'UTR	Island	7	+	44622024	44623271	44622024		-380.263
14	cg13822849	TC09001710.hg.1	-0.144591	0.699845	0.836368	no	+	9	137999757	OLFM1	Body	S_Shelf	9	-	137797736	137809809	137809809	FCN1	-189.948
17	cg17852385	TC15002624.hg.1	0.0252021	0.123079	0.837805	no	+	15	75019188	CYP1A1	TSS1500	Island	15	-	74631628	74636162	74636162	CYP11A1	-383.026
18	cg02869559	TC21000695.hg.1	-0.0119136	0.0582088	0.837878	no	+	21	36259067	RUNX1	Body;Body;Body	Island	21	+	36377027	36384582	36377027		117.96
10	cg04180046	TC07002284.hg.1	-0.0195256	0.0955553	0.838137	no	+	7	45002736	MYO1G	Body	Island	7	+	44887843	44889231	44887843		-114.893
18	cg00994804	TC21000942.hg.1	0.00915705	0.0454593	0.840407	no	+	21	36259383	RUNX1	1stExon;1stExon;Body	Island	21	-	36089937	36090503	36090503	CLIC6	-168.88
10	cg19089201	TC07001351.hg.1	0.00887943	0.0441925	0.840804	no	+	7	45002287	MYO1G	3'UTR	Island	7	-	45139699	45151646	45151646	TBRG4;SNORA5B	149.359
6	cg21161138	TC05002793.hg.1	0.0626933	0.31268	0.841135	no	-	5	399360	AHRR	Body	OpenSea	5	-	214013	217394	217394		-181.966
17	cg05549655	TC15002283.hg.1	0.0409642	0.204905	0.841592	no	+	15	75019143	CYP1A1	TSS1500	Island	15	+	74800497	74806312	74800497		-218.646
12	cg11207515	TC07002652.hg.1	-0.0197072	0.0989382	0.842164	no	-	7	146904205	CNTNAP2	Body	OpenSea	7	+	147368771	147370236	147368771		464.566
6	cg11902777	TC05003402.hg.1	-0.0462586	0.232677	0.842458	no	-	5	368843	AHRR	Body	N_Shore	5	-	710472	767323	767323	ZDHHC11B	398.48
6	cg11902777	TC05001093.hg.1	0.0698024	0.351351	0.842569	no	-	5	368843	AHRR	Body	N_Shore	5	-	269973	271631	271631		-97.212
14	cg13822849	TC09002343.hg.1	-0.0351723	0.179407	0.844619	no	+	9	137999757	OLFM1	Body	S_Shelf	9	+	138244530	138246066	138244530		244.773
3	cg09935388	TC01002866.hg.1	-0.0159386	0.0816035	0.845191	no	-	1	92947588	GFI1	Body;Body;Body	Island	1	-	92711955	92764566	92764566	GLMN	-183.022
15	cg11813497	TC10001053.hg.1	0.0142845	0.0731563	0.845236	no	+	10	14372879	FRMD4A	TSS200	OpenSea	10	-	13685706	14504143	14504143	FRMD4A	131.264
7	cg01876548	TC05000584.hg.1	0.0424032	0.217786	0.845673	no	-	5	124126863			OpenSea	5	+	123805284	123805594	123805284		-321.579
6	cg05575921	TC05001096.hg.1	0.0149159	0.0766589	0.845772	no	-	5	373378	AHRR	Body	N_Shore	5	-	473334	524549	524549	SLC9A3	151.171
8	cg05767720	TC06003597.hg.1	0.0286153	0.147073	0.84578	no	+	6	32117281	PRRT1	Body	N_Shore	6	-	32065954	32085387	32085387	TNXB;ATF6B	-31.894
14	cg13822849	TC09002337.hg.1	-0.02929	0.151617	0.84686	no	+	9	137999757	OLFM1	Body	S_Shelf	9	+	137645963	137647175	137645963		-353.794
17	cg17852385	TC15001645.hg.1	0.0255123	0.132467	0.847323	no	+	15	75019188	CYP1A1	TSS1500	Island	15	-	74783299	74783372	74783372		-235.816
15	cg25464840	TC10000108.hg.1	0.0325895	0.171024	0.84892	no	+	10	14372910	FRMD4A	TSS200	OpenSea	10	+	14033815	14049525	14033815		-339.095
17	cg26516004	TC15001650.hg.1	0.138208	0.727151	0.849301	no	+	15	75019376	CYP1A1	TSS1500	S_Shore	15	-	75136071	75165719	75165719	SCAMP2	146.343
6	cg23067299	TC05002802.hg.1	-0.0982519	0.523681	0.851221	no	+	5	323907	AHRR	Body	S_Shore	5	-	763495	764229	764229		440.322
17	cg13570656	TC15000690.hg.1	-0.0138595	0.074272	0.852015	no	+	15	75019196	CYP1A1	TSS1500	Island	15	+	75315896	75343067	75315896	PPCDC	296.7
18	cg01664727	TC21000941.hg.1	-0.0180782	0.0974291	0.85284	no	+	21	36258423	RUNX1	Body;Body;Body	N_Shore	21	-	35949774	35950546	35950546		-307.877
4	cg18703066	TC02004468.hg.1	0.161611	0.87828	0.854051	no	-	2	105363536			OpenSea	2	-	105810305	105813861	105813861		450.325
6	cg11902777	TC05002794.hg.1	-0.0636455	0.350819	0.856081	no	-	5	368843	AHRR	Body	N_Shore	5	-	269973	271631	271631		-97.212
3	cg09935388	TC01000856.hg.1	-0.0170408	0.0950189	0.857712	no	-	1	92947588	GFI1	Body;Body;Body	Island	1	+	93311616	93311739	93311616		364.028
18	cg01664727	TC21000691.hg.1	0.00940935	0.0524864	0.857767	no	+	21	36258423	RUNX1	Body;Body;Body	N_Shore	21	+	35779935	35780677	35779935		-478.488
10	cg19089201	TC07002288.hg.1	0.022898	0.12832	0.858416	no	+	7	45002287	MYO1G	3'UTR	Island	7	+	45039345	45116069	45039345	CCM2	37.058
6	cg05575921	TC05002172.hg.1	-0.0504279	0.288483	0.861275	no	-	5	373378	AHRR	Body	N_Shore	5	+	195893	196449	195893		-177.485
6	cg05575921	TC05002793.hg.1	0.0599737	0.345034	0.862048	no	-	5	373378	AHRR	Body	N_Shore	5	-	214013	217394	217394		-155.984
1	cg18540492	TC01005476.hg.1	0.0853796	0.491726	0.862195	no	+	1	50489418	AGBL4	Body	Island	1	-	50671756	50688799	50688799		199.381
6	cg17924476	TC05002175.hg.1	0.0329822	0.192485	0.863989	no	+	5	323794	AHRR	Body	S_Shore	5	+	667579	668841	667579	LOC100132605	343.785
10	cg19089201	TC07000276.hg.1	0.0187188	0.110699	0.865761	no	+	7	45002287	MYO1G	3'UTR	Island	7	+	44646121	44748669	44646121	OGDH	-356.166
17	cg12101586	TC15002282.hg.1	-0.0131053	0.0775558	0.865853	no	+	15	75019203	CYP1A1	TSS1500	Island	15	+	74779937	74796235	74779937		-239.266
17	cg00213123	TC15000687.hg.1	0.0327183	0.195165	0.866903	no	+	15	75019070	CYP1A1	TSS1500	Island	15	+	75182363	75191798	75182363	MPI	163.293
5	cg14204430	TC04002150.hg.1	0.0571537	0.347379	0.869354	no	+	4	116035217	NDST4	TSS200	OpenSea	4	+	116102449	116191383	116102449		67.232
17	cg00213123	TC15002280.hg.1	-0.0313357	0.19129	0.869917	no	+	15	75019070	CYP1A1	TSS1500	Island	15	+	74683013	74685651	74683013		-336.057
6	cg21161138	TC05000001.hg.1	-0.0320229	0.19748	0.87122	no	-	5	399360	AHRR	Body	OpenSea	5	+	92266	139978	92266		-307.094
17	cg05549655	TC15000680.hg.1	-0.0240774	0.148695	0.871404	no	+	15	75019143	CYP1A1	TSS1500	Island	15	+	74646797	74656961	74646797	LOC729739	-372.346
6	cg11902777	TC05002803.hg.1	0.0612126	0.378783	0.871656	no	-	5	368843	AHRR	Body	N_Shore	5	-	767618	769262	769262		400.419
8	cg05767720	TC06001554.hg.1	0.016372	0.101633	0.872061	no	+	6	32117281	PRRT1	Body	N_Shore	6	-	31967753	31971298	31971298		-145.983
8	cg05767720	TC06001556.hg.1	0.016372	0.101633	0.872061	no	+	6	32117281	PRRT1	Body	N_Shore	6	-	32000490	32004035	32004035	C2-AS1	-113.246
6	cg05575921	TC05002804.hg.1	0.0219907	0.136734	0.872267	no	-	5	373378	AHRR	Body	N_Shore	5	-	858994	860350	860350		486.972
18	cg02869559	TC21000424.hg.1	0.013834	0.0865964	0.873114	no	+	21	36259067	RUNX1	Body;Body;Body	Island	21	-	36195761	36198703	36198703		-60.364
17	cg12101586	TC15001656.hg.1	-0.0113227	0.0710478	0.873417	no	+	15	75019203	CYP1A1	TSS1500	Island	15	-	75413877	75414007	75414007		394.804
8	cg05767720	TC06000384.hg.1	0.047152	0.297066	0.873922	no	+	6	32117281	PRRT1	Body	N_Shore	6	+	31783241	31785723	31783241	HSPA1A;HSPA1B	-334.04
18	cg01664727	TC21000419.hg.1	0.00829213	0.0522596	0.873965	no	+	21	36258423	RUNX1	Body;Body;Body	N_Shore	21	-	35828408	35828535	35828535		-429.888
17	cg11924019	TC15000680.hg.1	-0.0206569	0.132813	0.876438	no	+	15	75019283	CYP1A1	TSS1500	Island	15	+	74646797	74656961	74646797	LOC729739	-372.486
6	cg11902777	TC05001092.hg.1	-0.0372631	0.242926	0.878125	no	-	5	368843	AHRR	Body	N_Shore	5	-	204872	218330	218330	CCDC127	-150.513
16	cg17454592	TC15001181.hg.1	0.0284149	0.185885	0.878542	no	-	15	33360353	FMN1	TSS1500	OpenSea	15	-	32948285	32965266	32965266		-395.087
13	cg17199018	TC08000215.hg.1	-0.0201212	0.134398	0.881026	no	-	8	28206278	ZNF395	Body	OpenSea	8	+	27761998	27767827	27761998		-444.28
10	cg22132788	TC07000279.hg.1	0.0113125	0.0762158	0.88204	no	+	7	45002486	MYO1G	Body	Island	7	+	44888015	44889167	44888015		-114.471
6	cg11902777	TC05002797.hg.1	0.0271549	0.187176	0.884684	no	-	5	368843	AHRR	Body	N_Shore	5	-	477487	483482	483482	SLC9A3	114.639
17	cg18092474	TC15001652.hg.1	0.0172894	0.119851	0.885331	no	+	15	75019302	CYP1A1	TSS1500	Island	15	-	75212132	75230509	75230509	COX5A	211.207
10	cg19089201	TC07000279.hg.1	0.0109005	0.0760312	0.886033	no	+	7	45002287	MYO1G	3'UTR	Island	7	+	44888015	44889167	44888015		-114.272
6	cg11902777	TC05002176.hg.1	0.0222647	0.156415	0.886842	no	-	5	368843	AHRR	Body	N_Shore	5	+	693675	785956	693675		324.832
13	cg17199018	TC08000218.hg.1	-0.0219775	0.161435	0.891744	no	-	8	28206278	ZNF395	Body	OpenSea	8	+	28273965	28274068	28273965		67.687
7	cg01876548	TC05001730.hg.1	-0.0187671	0.138638	0.892353	no	-	5	124126863			OpenSea	5	-	123828468	123872041	123872041		-254.822
17	cg11924019	TC15000686.hg.1	-0.0043644	0.0322928	0.892524	no	+	15	75019283	CYP1A1	TSS1500	Island	15	+	75105057	75124143	75105057	CPLX3;LMAN1L	85.774
17	cg22549041	TC15000686.hg.1	-0.00235448	0.0174329	0.892596	no	+	15	75019251	CYP1A1	TSS1500	Island	15	+	75105057	75124143	75105057	CPLX3;LMAN1L	85.806
17	cg05549655	TC15000691.hg.1	-0.0272551	0.202175	0.892794	no	+	15	75019143	CYP1A1	TSS1500	Island	15	+	75491233	75504510	75491233	C15orf39	472.09
17	cg18092474	TC15001656.hg.1	-0.00946729	0.0705776	0.893323	no	+	15	75019302	CYP1A1	TSS1500	Island	15	-	75413877	75414007	75414007		394.705
17	cg11924019	TC15001642.hg.1	0.00557406	0.0424263	0.895504	no	+	15	75019283	CYP1A1	TSS1500	Island	15	-	74630100	74660081	74660081	CYP11A1	-359.202
14	cg13822849	TC09001703.hg.1	0.0296728	0.22728	0.896157	no	+	9	137999757	OLFM1	Body	S_Shelf	9	-	137711261	137764464	137764464	LOC101448202	-235.293
11	cg04598670	TC07001477.hg.1	0.00862228	0.0660448	0.89616	no	-	7	68697651			OpenSea	7	-	68689683	68895909	68895909		198.258
18	cg00994804	TC21000691.hg.1	-0.00448234	0.0344797	0.896598	no	+	21	36259383	RUNX1	1stExon;1stExon;Body	Island	21	+	35779935	35780677	35779935		-479.448
4	cg18703066	TC02002165.hg.1	0.117761	0.920023	0.89818	no	-	2	105363536			OpenSea	2	-	105713510	105719402	105719402	UTAT33	355.866
17	cg12101586	TC15001651.hg.1	-0.00664397	0.0545608	0.903108	no	+	15	75019203	CYP1A1	TSS1500	Island	15	-	75192328	75199462	75199462	FAM219B	180.259
1	cg18540492	TC01004377.hg.1	-0.0534965	0.442201	0.903737	no	+	1	50489418	AGBL4	Body	Island	1	+	50786946	50790716	50786946		297.528
6	cg21161138	TC05000008.hg.1	0.0236678	0.201557	0.906551	no	-	5	399360	AHRR	Body	OpenSea	5	+	524820	526709	524820		125.46
6	cg23067299	TC05001096.hg.1	-0.0118689	0.102986	0.908276	no	+	5	323907	AHRR	Body	S_Shore	5	-	473334	524549	524549	SLC9A3	200.642
8	cg05767720	TC06001544.hg.1	0.0298827	0.26117	0.908933	no	+	6	32117281	PRRT1	Body	N_Shore	6	-	31746594	31746682	31746682		-370.599
11	cg04598670	TC07000421.hg.1	0.0202585	0.182383	0.911582	no	-	7	68697651			OpenSea	7	+	68527589	68527662	68527589		-170.062
3	cg09935388	TC01004529.hg.1	-0.0156269	0.142162	0.912496	no	-	1	92947588	GFI1	Body;Body;Body	Island	1	+	92864531	92867614	92864531		-83.057
17	cg22549041	TC15002283.hg.1	0.0108144	0.0988019	0.912867	no	+	15	75019251	CYP1A1	TSS1500	Island	15	+	74800497	74806312	74800497		-218.754
10	cg22132788	TC07000275.hg.1	-0.0112115	0.102463	0.912895	no	+	7	45002486	MYO1G	Body	Island	7	+	44622024	44623271	44622024		-380.462
8	cg05767720	TC06004050.hg.1	-0.015163	0.139404	0.91341	no	+	6	32117281	PRRT1	Body	N_Shore	6	-	32152510	32157963	32157963	PBX2	40.682
3	cg14179389	TC01000849.hg.1	0.00826827	0.0766367	0.914109	no	-	1	92947961	GFI1	Body;Body;Body	Island	1	+	92495533	92529093	92495533	EPHX4	-452.428
18	cg00994804	TC21000138.hg.1	0.00326773	0.0313909	0.917116	no	+	21	36259383	RUNX1	1stExon;1stExon;Body	Island	21	+	36041688	36090525	36041688	CLIC6	-217.695
3	cg14179389	TC01002868.hg.1	-0.0124758	0.120109	0.917296	no	-	1	92947961	GFI1	Body;Body;Body	Island	1	-	92974253	93257961	93257961	EVI5	310
17	cg26516004	TC15002285.hg.1	-0.0611044	0.588644	0.917348	no	+	15	75019376	CYP1A1	TSS1500	S_Shore	15	+	75288945	75289555	75288945		269.569
6	cg17924476	TC05002799.hg.1	0.0104606	0.101574	0.917999	no	+	5	323794	AHRR	Body	S_Shore	5	-	602735	612325	612325		288.531
2	cg25189904	TC01004456.hg.1	0.0108212	0.106455	0.919058	no	-	1	68299493	GNG12	TSS1500	S_Shore	1	+	67987996	67998015	67987996		-311.497
6	cg05575921	TC05001092.hg.1	-0.0198109	0.195378	0.919258	no	-	5	373378	AHRR	Body	N_Shore	5	-	204872	218330	218330	CCDC127	-155.048
8	cg05767720	TC06004117.hg.1	-0.00761383	0.0751248	0.919297	no	+	6	32117281	PRRT1	Body	N_Shore	6	-	31679548	31681842	31681842	LY6G6E	-435.439
14	cg13822849	TC09002844.hg.1	-0.023399	0.240028	0.922364	no	+	9	137999757	OLFM1	Body	S_Shelf	9	-	137711261	137764464	137764464	LOC101448202	-235.293
18	cg03142697	TC21000141.hg.1	-0.0114387	0.121256	0.924865	no	+	21	36258497	RUNX1	Body;Body;Body	N_Shore	21	+	36231771	36231871	36231771		-26.726
6	cg05575921	TC05002796.hg.1	-0.0197337	0.210233	0.925238	no	-	5	373378	AHRR	Body	N_Shore	5	-	470626	473178	473178	PP7080	99.8
17	cg11924019	TC15001645.hg.1	-0.0135826	0.146159	0.925981	no	+	15	75019283	CYP1A1	TSS1500	Island	15	-	74783299	74783372	74783372		-235.911
6	cg11902777	TC05002793.hg.1	-0.0390699	0.429012	0.927459	no	-	5	368843	AHRR	Body	N_Shore	5	-	214013	217394	217394		-151.449
10	cg22132788	TC07002284.hg.1	-0.00784334	0.086222	0.92754	no	+	7	45002486	MYO1G	Body	Island	7	+	44887843	44889231	44887843		-114.643
17	cg22549041	TC15000680.hg.1	0.00651829	0.0716983	0.927583	no	+	15	75019251	CYP1A1	TSS1500	Island	15	+	74646797	74656961	74646797	LOC729739	-372.454
17	cg26516004	TC15001645.hg.1	-0.0625057	0.701877	0.929059	no	+	15	75019376	CYP1A1	TSS1500	S_Shore	15	-	74783299	74783372	74783372		-236.004
16	cg17454592	TC15001184.hg.1	-0.0458019	0.522686	0.930193	no	-	15	33360353	FMN1	TSS1500	OpenSea	15	-	33256180	33256277	33256277		-104.076
8	cg05767720	TC06001566.hg.1	0.00537644	0.0620335	0.930954	no	+	6	32117281	PRRT1	Body	N_Shore	6	-	32359241	32379511	32379511	BTNL2	262.23
18	cg00994804	TC21000944.hg.1	-0.00638467	0.073669	0.930957	no	+	21	36259383	RUNX1	1stExon;1stExon;Body	Island	21	-	36195761	36198703	36198703		-60.68
17	cg18092474	TC15002283.hg.1	-0.0106545	0.122956	0.930968	no	+	15	75019302	CYP1A1	TSS1500	Island	15	+	74800497	74806312	74800497		-218.805
6	cg21161138	TC05000002.hg.1	0.00667092	0.0796261	0.933252	no	-	5	399360	AHRR	Body	OpenSea	5	+	140373	190087	140373	PLEKHG4B	-258.987
12	cg25949550	TC07000960.hg.1	0.0124904	0.153493	0.935163	no	-	7	145814306	CNTNAP2	Body	S_Shore	7	+	145813453	148118090	145813453	CNTNAP2	-0.853
17	cg18092474	TC15000682.hg.1	-0.00406269	0.0510082	0.936536	no	+	15	75019302	CYP1A1	TSS1500	Island	15	+	74833518	74890472	74833518	ARID3B	-185.784
8	cg05767720	TC06004079.hg.1	0.0025058	0.0318625	0.937334	no	+	6	32117281	PRRT1	Body	N_Shore	6	+	31949801	31970458	31949801	C4B;C4B_2;C4A	-167.48
16	cg17454592	TC15001177.hg.1	0.038824	0.503692	0.938579	no	-	15	33360353	FMN1	TSS1500	OpenSea	15	-	32891573	32891611	32891611		-468.742
17	cg18092474	TC15002282.hg.1	0.00588438	0.0770433	0.939137	no	+	15	75019302	CYP1A1	TSS1500	Island	15	+	74779937	74796235	74779937		-239.365
17	cg17852385	TC15002283.hg.1	-0.0125248	0.16588	0.939831	no	+	15	75019188	CYP1A1	TSS1500	Island	15	+	74800497	74806312	74800497		-218.691
1	cg18540492	TC01000612.hg.1	-0.0369987	0.49925	0.940941	no	+	1	50489418	AGBL4	Body	Island	1	+	50447887	50447967	50447887		-41.531
3	cg14179389	TC01000850.hg.1	0.00611724	0.0828914	0.941188	no	-	1	92947961	GFI1	Body;Body;Body	Island	1	+	92545862	92613401	92545862	BTBD8	-402.099
18	cg02869559	TC21000691.hg.1	0.00303276	0.0413352	0.941529	no	+	21	36259067	RUNX1	Body;Body;Body	Island	21	+	35779935	35780677	35779935		-479.132
4	cg18703066	TC02004464.hg.1	-0.0393439	0.542082	0.942158	no	-	2	105363536			OpenSea	2	-	105363089	105374177	105374177		10.641
17	cg13570656	TC15001645.hg.1	-0.00619896	0.0860051	0.942558	no	+	15	75019196	CYP1A1	TSS1500	Island	15	-	74783299	74783372	74783372		-235.824
17	cg26516004	TC15001651.hg.1	-0.0276491	0.387423	0.943123	no	+	15	75019376	CYP1A1	TSS1500	S_Shore	15	-	75192328	75199462	75199462	FAM219B	180.086
10	cg22132788	TC07000276.hg.1	-0.00785751	0.11097	0.943567	no	+	7	45002486	MYO1G	Body	Island	7	+	44646121	44748669	44646121	OGDH	-356.365
17	cg26516004	TC15000687.hg.1	0.0370208	0.535171	0.944866	no	+	15	75019376	CYP1A1	TSS1500	S_Shore	15	+	75182363	75191798	75182363	MPI	162.987
10	cg04180046	TC07002287.hg.1	-0.0101659	0.148752	0.94553	no	+	7	45002736	MYO1G	Body	Island	7	+	45034628	45038116	45034628		31.892
18	cg03142697	TC21000138.hg.1	-0.00247385	0.0387159	0.949067	no	+	21	36258497	RUNX1	Body;Body;Body	N_Shore	21	+	36041688	36090525	36041688	CLIC6	-216.809
3	cg09935388	TC01002868.hg.1	0.00803723	0.127271	0.949661	no	-	1	92947588	GFI1	Body;Body;Body	Island	1	-	92974253	93257961	93257961	EVI5	310.373
6	cg17924476	TC05002800.hg.1	-0.0179481	0.301768	0.952586	no	+	5	323794	AHRR	Body	S_Shore	5	-	654144	654462	654462		330.668
3	cg09935388	TC01000854.hg.1	0.00443607	0.0747994	0.952722	no	-	1	92947588	GFI1	Body;Body;Body	Island	1	+	93297594	93307481	93297594	RPL5;SNORD21;SNORA66	350.006
4	cg18703066	TC02004460.hg.1	0.0696511	1.24108	0.955258	no	-	2	105363536			OpenSea	2	-	105028610	105030489	105030489	LOC101927331	-333.047
1	cg18540492	TC01002638.hg.1	-0.00674142	0.125959	0.957329	no	+	1	50489418	AGBL4	Body	Island	1	-	48998527	50489626	50489626	AGBL4	0.208
4	cg18703066	TC02002157.hg.1	0.0393929	0.83219	0.962256	no	-	2	105363536			OpenSea	2	-	105028685	105030466	105030466		-333.07
4	cg18703066	TC02000640.hg.1	0.0690747	1.48678	0.962955	no	-	2	105363536			OpenSea	2	+	105349692	105349820	105349692		-13.844
17	cg17852385	TC15001656.hg.1	-0.00440046	0.0952166	0.963149	no	+	15	75019188	CYP1A1	TSS1500	Island	15	-	75413877	75414007	75414007		394.819
7	cg01876548	TC05000596.hg.1	0.00996659	0.232638	0.965838	no	-	5	124126863			OpenSea	5	+	124443897	124485622	124443897		317.034
6	cg05575921	TC05000004.hg.1	-0.0074828	0.182834	0.967364	no	-	5	373378	AHRR	Body	N_Shore	5	+	218356	256815	218356	SDHA	-155.022
7	cg01876548	TC05003212.hg.1	-0.00788016	0.19675	0.968061	no	-	5	124126863			OpenSea	5	-	123676150	123676863	123676863		-450
18	cg02869559	TC21000942.hg.1	0.0021655	0.0544987	0.968314	no	+	21	36259067	RUNX1	Body;Body;Body	Island	21	-	36089937	36090503	36090503	CLIC6	-168.564
7	cg01876548	TC05003216.hg.1	-0.00744552	0.193789	0.969361	no	-	5	124126863			OpenSea	5	-	124204487	124211743	124211743		84.88
18	cg03142697	TC21000691.hg.1	0.00152819	0.0425256	0.971342	no	+	21	36258497	RUNX1	Body;Body;Body	N_Shore	21	+	35779935	35780677	35779935		-478.562
6	cg11902777	TC05000001.hg.1	-0.00960671	0.270951	0.971725	no	-	5	368843	AHRR	Body	N_Shore	5	+	92266	139978	92266		-276.577
6	cg11902777	TC05002171.hg.1	-0.00797694	0.231125	0.972476	no	-	5	368843	AHRR	Body	N_Shore	5	+	92264	139978	92264		-276.579
17	cg26516004	TC15000686.hg.1	-0.00513701	0.155076	0.973582	no	+	15	75019376	CYP1A1	TSS1500	S_Shore	15	+	75105057	75124143	75105057	CPLX3;LMAN1L	85.681
8	cg05767720	TC06002720.hg.1	-0.00348814	0.107159	0.97404	no	+	6	32117281	PRRT1	Body	N_Shore	6	+	31964272	31964815	31964272	C4A	-153.009
10	cg19089201	TC07000280.hg.1	0.00263566	0.0817134	0.974276	no	+	7	45002287	MYO1G	3'UTR	Island	7	+	45039074	45116069	45039074	CCM2	36.787
17	cg05549655	TC15001656.hg.1	0.00366243	0.11762	0.975167	no	+	15	75019143	CYP1A1	TSS1500	Island	15	-	75413877	75414007	75414007		394.864
6	cg05575921	TC05000003.hg.1	-0.00752158	0.242597	0.975273	no	-	5	373378	AHRR	Body	N_Shore	5	+	191626	195468	191626	LRRC14B	-181.752
10	cg22132788	TC07002283.hg.1	-0.00297584	0.107068	0.977833	no	+	7	45002486	MYO1G	Body	Island	7	+	44622024	44623270	44622024		-380.462
7	cg01876548	TC05001732.hg.1	-0.00553797	0.199724	0.977885	no	-	5	124126863			OpenSea	5	-	124056705	124057375	124057375		-69.488
18	cg02869559	TC21000138.hg.1	-0.000992091	0.0376322	0.978974	no	+	21	36259067	RUNX1	Body;Body;Body	Island	21	+	36041688	36090525	36041688	CLIC6	-217.379
4	cg18703066	TC02003462.hg.1	-0.017745	0.676862	0.979091	no	-	2	105363536			OpenSea	2	+	105469951	105471715	105469951		106.415
9	cg07105221	TC07002767.hg.1	0.00268367	0.106995	0.979995	no	-	7	4859448	RADIL	Body	S_Shelf	7	-	4936899	4938466	4938466		79.018
17	cg00213123	TC15000689.hg.1	-0.00459923	0.184142	0.980079	no	+	15	75019070	CYP1A1	TSS1500	Island	15	+	75288945	75289555	75288945	SCAMP5	269.875
17	cg17852385	TC15001642.hg.1	0.000930442	0.038453	0.980701	no	+	15	75019188	CYP1A1	TSS1500	Island	15	-	74630100	74660081	74660081	CYP11A1	-359.107
6	cg21161138	TC05002795.hg.1	0.0055912	0.232366	0.980809	no	-	5	399360	AHRR	Body	OpenSea	5	-	414939	417808	417808		18.448
3	cg14179389	TC01002869.hg.1	-0.00572467	0.251552	0.981849	no	-	1	92947961	GFI1	Body;Body;Body	Island	1	-	93166376	93166491	93166491		218.53
8	cg05767720	TC06002722.hg.1	0.00278676	0.131066	0.983041	no	+	6	32117281	PRRT1	Body	N_Shore	6	+	31981167	31981960	31981167		-136.114
8	cg05767720	TC06000385.hg.1	-0.00564197	0.289259	0.984443	no	+	6	32117281	PRRT1	Body	N_Shore	6	+	31795512	31798032	31795512	HSPA1B;HSPA1A	-321.769
6	cg21161138	TC05002173.hg.1	-0.00316302	0.21343	0.988179	no	-	5	399360	AHRR	Body	OpenSea	5	+	468367	472052	468367		69.007
3	cg09935388	TC01002869.hg.1	-0.00377461	0.266551	0.988705	no	-	1	92947588	GFI1	Body;Body;Body	Island	1	-	93166376	93166491	93166491		218.903
8	cg05767720	TC06004078.hg.1	-0.000610219	0.0447373	0.98912	no	+	6	32117281	PRRT1	Body	N_Shore	6	+	31938868	31949228	31938868	STK19	-178.413
6	cg23067299	TC05001099.hg.1	-0.00267491	0.197003	0.98917	no	+	5	323907	AHRR	Body	S_Shore	5	-	659977	693510	693510	TPPP	369.603
17	cg12101586	TC15001645.hg.1	-0.00125188	0.0988465	0.989898	no	+	15	75019203	CYP1A1	TSS1500	Island	15	-	74783299	74783372	74783372		-235.831
6	cg23067299	TC05002172.hg.1	-0.00478119	0.387557	0.99016	no	+	5	323907	AHRR	Body	S_Shore	5	+	195893	196449	195893		-128.014
14	cg13822849	TC09000787.hg.1	-0.000407419	0.0340031	0.990443	no	+	9	137999757	OLFM1	Body	S_Shelf	9	+	137533620	137736688	137533620	COL5A1	-466.137
6	cg17924476	TC05002801.hg.1	-0.0011758	0.103384	0.990928	no	+	5	323794	AHRR	Body	S_Shore	5	-	710470	767576	767576		443.782
17	cg18092474	TC15000686.hg.1	-0.000241563	0.0216949	0.991119	no	+	15	75019302	CYP1A1	TSS1500	Island	15	+	75105057	75124143	75105057	CPLX3;LMAN1L	85.755
2	cg25189904	TC01000742.hg.1	0.00188976	0.172116	0.991242	no	-	1	68299493	GNG12	TSS1500	S_Shore	1	+	67882897	67883001	67882897		-416.596
17	cg18092474	TC15001646.hg.1	0.000786754	0.0728843	0.99139	no	+	15	75019302	CYP1A1	TSS1500	Island	15	-	74922899	74988386	74988386	EDC3	-30.916
15	cg20344448	TC10001053.hg.1	-0.000817864	0.0842986	0.992261	no	+	10	14372431	FRMD4A	5'UTR	OpenSea	10	-	13685706	14504143	14504143	FRMD4A	131.712
6	cg11902777	TC05001096.hg.1	0.000851696	0.0953178	0.992873	no	-	5	368843	AHRR	Body	N_Shore	5	-	473334	524549	524549	SLC9A3	155.706
6	cg05575921	TC05002797.hg.1	0.00114632	0.150541	0.993926	no	-	5	373378	AHRR	Body	N_Shore	5	-	477487	483482	483482	SLC9A3	110.104
17	cg22549041	TC15000690.hg.1	-0.000131677	0.0681396	0.998459	no	+	15	75019251	CYP1A1	TSS1500	Island	15	+	75315896	75343067	75315896	PPCDC	296.645
15	cg20344448	TC10000108.hg.1	-3.75864e-05	0.191399	0.999843	no	+	10	14372431	FRMD4A	5'UTR	OpenSea	10	+	14033815	14049525	14033815		-338.616
1Transcript cluster.
2Transcription strat site.
Note: The association between CpGs at RUNX1 locus and RUNX1 expression has not been tested because the TC (TC21000423.hg.1) for RUNX1 at the HTA v2 array has the TSS at >1 Mb.

## Sheet: TS5
Table S5. Association of maternal smoking in pregnancy and child molecular phenotypes adjusted for global-SHS
All molecular marks reaching multiple-testing correction in one of the main models (any or sustained maternal smoking in pregnancy) are shown
		Any maternal smoking in pregnancy				Sustained maternal smoking in pregnancy
Molecular layer	Molecular mark	Log2FC	SE	P-value	Adj. P-value	Log2FC	SE	P-value	Adj. P-value	% change1
Urinary metabolites	Alanine	0.0925344	0.0404653	0.0371874	no	0.18866	0.0296497	0.000392809	yes	103.88
Urinary metabolites	Lactate	0.0811733	0.0510969	0.0515614	no	0.174367	0.0364875	0.000519488	yes	114.808
1Percentage change of the effect comparing sustained vs any maternal smoking in pregnancy [Sign(Max(βSust;βAny))*(βSust. - βAny)/|βAny|*100].

## Sheet: TS6
Table S6. Association between maternal smoking in pregnancy and child blood expression levels of top genes, ordered by p-value of sustained maternal smoking in pregnancy
Only top 10 associations (according to p-value) of any or sustained maternal smoking in pregnancy are shown
	Any maternal smoking in pregnancy				Sustained maternal smoking in pregnancy					TC annotation
TC1	Log2FC	SE	P-value	Adj. P-value	Log2FC	SE	P-value	Adj. P-value	% change2	Chr	Strand	Start	Stop	TSS3	GeneSymbol	Gene assignment	mRNA assignment
TC15002371.hg.1	-0.0524701	0.0144259	0.00199862	no	-0.0868896	0.115922	2.13699e-05	no	65.5982	15	+	92006569	92038078	92006569		---	TCONS_00023240 // NONCODE // accn=NULL class=lncRNA name=Human lincRNA ref=BodyMapLinc transcriptId=TCONS_00023240 cpcScore=-1.0861900 cnci=-0.3749674 // chr15 // 100 // 100 // 0 // --- // 0
TC2000+A22:P220362.hg.1	-0.0311994	0.0152252	0.00302979	no	-0.0541296	0.0137981	2.17794e-05	no	73.4959	20	+	44563267	44576662	44563267	PCIF1	NM_022104 // PCIF1 // PDX1 C-terminal inhibiting factor 1 // 20q13.12 // 63935 /// ENST00000372409 // PCIF1 // PDX1 C-terminal inhibiting factor 1 // 20q13.12 // 63935 /// ENST00000479348 // PCIF1 // PDX1 C-terminal inhibiting factor 1 // 20q13.12 // 63935 /// AL137473 // PCIF1 // PDX1 C-terminal inhibiting factor 1 // 20q13.12 // 63935 /// BC010005 // PCIF1 // PDX1 C-terminal inhibiting factor 1…	NM_022104 // RefSeq // Homo sapiens PDX1 C-terminal inhibiting factor 1 (PCIF1), mRNA. // chr20 // 100 // 100 // 0 // --- // 0 /// ENST00000372409 // ENSEMBL // PDX1 C-terminal inhibiting factor 1 [gene_biotype:protein_coding transcript_biotype:protein_coding] // chr20 // 100 // 100 // 0 // --- // 0 /// ENST00000479348 // ENSEMBL // PDX1 C-terminal inhibiting factor 1 [gene_biotype:protein_coding…
TC10000730.hg.1	-0.0182003	0.00974235	0.00047239	no	-0.0265639	0.0180101	2.18762e-05	no	45.9532	10	+	102756375	102767593	102756375	LZTS2	NM_032429 // LZTS2 // leucine zipper, putative tumor suppressor 2 // 10q24 // 84445 /// ENST00000370220 // LZTS2 // leucine zipper, putative tumor suppressor 2 // 10q24 // 84445 /// ENST00000370223 // LZTS2 // leucine zipper, putative tumor suppressor 2 // 10q24 // 84445 /// AB058716 // LZTS2 // leucine zipper, putative tumor suppressor 2 // 10q24 // 84445 /// AK097997 // LZTS2 // leucine zipper,…	NM_032429 // RefSeq // Homo sapiens leucine zipper, putative tumor suppressor 2 (LZTS2), mRNA. // chr10 // 100 // 100 // 0 // --- // 0 /// ENST00000370220 // ENSEMBL // leucine zipper, putative tumor suppressor 2 [gene_biotype:protein_coding transcript_biotype:protein_coding] // chr10 // 100 // 100 // 0 // --- // 0 /// ENST00000370223 // ENSEMBL // leucine zipper, putative tumor suppressor 2 [gen…
TC05002520.hg.1	0.0394654	0.0210826	0.00250996	no	0.0659937	0.0303636	3.13555e-05	no	67.2192	5	+	95187936	95198734	95187936		---	linc_luo_385 // NONCODE // accn=NULL class=lincRNA name=Human lincRNA ref=Scripture Reconstruction LincRNAs By Luo transcriptId=linc_luo_385 cpcScore=-1.3508000 cnci=-0.2740612 // chr5 // 100 // 100 // 0 // --- // 0 /// uc003klp.2 // NONCODE // accn=NULL class=lncRNA name= ref=UCSCGeneNoncode transcriptId=uc003klp.2 cpcScore=1.1299500 cnci=-0.1903844 // chr5 // 100 // 100 // 0 // --- // 0 /// uc0…
TC03002702.hg.1	0.110396	0.0148725	3.21913e-05	no	0.130368	0.0170592	4.82216e-05	no	18.0913	3	+	185000760	185010833	185000760		---	linc_luo_324 // NONCODE // accn=NULL class=lincRNA name=Human lincRNA ref=Scripture Reconstruction LincRNAs By Luo transcriptId=linc_luo_324 cpcScore=-1.3561800 cnci=-0.3444551 // chr3 // 100 // 100 // 0 // --- // 0
TC07003117.hg.1	-0.0883816	0.011582	0.000383528	no	-0.120764	0.0205707	6.3343e-05	no	36.6397	7	-	113134743	113138753	113138753		---	TCONS_00013229 // NONCODE // accn=NULL class=lncRNA name=Human lincRNA ref=BodyMapLinc transcriptId=TCONS_00013229 cpcScore=-1.2373000 cnci=-0.3990844 // chr7 // 100 // 100 // 0 // --- // 0
TC03001706.hg.1	0.0605538	0.0150163	0.000485618	no	0.0812826	0.0273313	0.000112624	no	34.2321	3	-	122458844	122512671	122512671	HSPBAP1	NM_024610 // HSPBAP1 // HSPB (heat shock 27kDa) associated protein 1 // 3q21.1 // 79663 /// ENST00000306103 // HSPBAP1 // HSPB (heat shock 27kDa) associated protein 1 // 3q21.1 // 79663 /// ENST00000465044 // HSPBAP1 // HSPB (heat shock 27kDa) associated protein 1 // 3q21.1 // 79663 /// AK026276 // HSPBAP1 // HSPB (heat shock 27kDa) associated protein 1 // 3q21.1 // 79663 /// BC011897 // HSPBAP1 …	NM_024610 // RefSeq // Homo sapiens HSPB (heat shock 27kDa) associated protein 1 (HSPBAP1), mRNA. // chr3 // 100 // 100 // 0 // --- // 0 /// ENST00000306103 // ENSEMBL // HSPB (heat shock 27kDa) associated protein 1 [gene_biotype:protein_coding transcript_biotype:protein_coding] // chr3 // 100 // 100 // 0 // --- // 0 /// ENST00000465044 // ENSEMBL // HSPB (heat shock 27kDa) associated protein 1 […
TC09002929.hg.1	-0.0231849	0.0171565	0.00633027	no	-0.0399087	0.0491785	0.000112893	no	72.1325	9	+	6720863	7175648	6720863	KDM4C	NM_001146694 // KDM4C // lysine (K)-specific demethylase 4C // 9p24.1 // 23081 /// NM_001146695 // KDM4C // lysine (K)-specific demethylase 4C // 9p24.1 // 23081 /// NM_001146696 // KDM4C // lysine (K)-specific demethylase 4C // 9p24.1 // 23081 /// NM_015061 // KDM4C // lysine (K)-specific demethylase 4C // 9p24.1 // 23081 /// ENST00000381306 // KDM4C // lysine (K)-specific demethylase 4C // 9p24…	NM_001146694 // RefSeq // Homo sapiens lysine (K)-specific demethylase 4C (KDM4C), transcript variant 2, mRNA. // chr9 // 100 // 100 // 0 // --- // 0 /// NM_001146695 // RefSeq // Homo sapiens lysine (K)-specific demethylase 4C (KDM4C), transcript variant 3, mRNA. // chr9 // 100 // 100 // 0 // --- // 0 /// NM_001146696 // RefSeq // Homo sapiens lysine (K)-specific demethylase 4C (KDM4C), transcri…
TC06001234.hg.1	0.0223715	0.0113656	0.000650462	no	0.0306665	0.0281624	0.000119225	no	37.0787	6	-	4049668	4087578	4087578	FAM217A	NM_173563 // FAM217A // family with sequence similarity 217, member A // 6p25.2 // 222826 /// ENST00000274673 // FAM217A // family with sequence similarity 217, member A // 6p25.2 // 222826 /// ENST00000380188 // FAM217A // family with sequence similarity 217, member A // 6p25.2 // 222826 /// AK097426 // FAM217A // family with sequence similarity 217, member A // 6p25.2 // 222826 /// BC039349 // …	NM_173563 // RefSeq // Homo sapiens family with sequence similarity 217, member A (FAM217A), mRNA. // chr6 // 100 // 100 // 0 // --- // 0 /// ENST00000274673 // ENSEMBL // family with sequence similarity 217, member A [gene_biotype:protein_coding transcript_biotype:protein_coding] // chr6 // 100 // 100 // 0 // --- // 0 /// ENST00000380188 // ENSEMBL // family with sequence similarity 217, member …
TC17001715.hg.1	-0.0677496	0.0114499	0.000590943	no	-0.0912986	0.0198194	0.000125628	no	34.759	17	-	54961463	54962274	54962274	MTVR2	NR_027025 // MTVR2 // mouse mammary tumor virus receptor homolog 2 // 17q23 // 246754 /// uc010wnj.1 // MTVR2 // mouse mammary tumor virus receptor homolog 2 // 17q23 // 246754 /// uc010wnj.1 // MTVR2 // mouse mammary tumor virus receptor homolog 2 // 17q23 // 246754	NR_027025 // RefSeq // Homo sapiens mouse mammary tumor virus receptor homolog 2 (MTVR2), non-coding RNA. // chr17 // 100 // 100 // 0 // --- // 0 /// uc010wnj.1 // UCSC Genes // Homo sapiens mouse mammary tumor virus receptor homolog 2 (MTVR2), non-coding RNA. // chr17 // 100 // 100 // 0 // --- // 0 /// uc010wnj.1 // NONCODE // accn=NULL class=lncRNA name= ref=UCSCGeneNoncode transcriptId=uc010wn…
TC06002630.hg.1	-0.0889227	0.0166754	0.000142492	no	-0.101716	0.00990478	0.000342844	no	14.3873	6	+	25292177	25292479	25292177		---	Z83937 // NONCODE // accn=Z83937 class=mRNAlike lncRNA name=Human lncRNA ref=JounralRNA transcriptId=3351 cpcScore=-1.1965000 cnci=-0.3193490 // chr6 // 100 // 100 // 0 // --- // 0
TC01001612.hg.1	0.0643386	0.0248312	0.000106462	no	0.0689699	0.0076872	0.000730921	no	7.1983	1	+	188874819	189006393	188874819		---	ENST00000445072 // ENSEMBL // long intergenic non-protein coding RNA 1035 [gene_biotype:lincRNA transcript_biotype:lincRNA] // chr1 // 100 // 100 // 0 // --- // 0 /// OTTHUMT00000086291 // NONCODE // putative novel transcript[gene_biotype:lincRNA transcript_biotype:lincRNA] // chr1 // 100 // 100 // 0 // --- // 0
TC17001212.hg.1	0.064907	0.0113377	1.5466e-05	no	0.0563918	0.0167065	0.00157971	no	-13.1191	17	-	18299431	18301432	18301432		---	DQ595299 // NONCODE // accn=DQ595299 class=piRNA name=piR-61411 ref=NONCODE v2.0 transcriptId=NULL cpcScore=-1.5855500 cnci=-1.0000000 // chr17 // 100 // 100 // 0 // --- // 0 /// DQ595299 // GenBank // Homo sapiens piRNA piR-61411, complete sequence. // chr17 // 100 // 100 // 0 // --- // 0 /// uc021trq.1 // UCSC Genes // Homo sapiens cDNA FLJ43966 fis, clone TESTI4017137. // chr17 // 100 // 100 /…
TC05002391.hg.1	0.0682501	0.0142378	0.000119179	no	0.0654513	0.0162226	0.00186751	no	-4.10076	5	+	58152283	58155219	58152283	RAB3C	AK094685 // RAB3C // RAB3C, member RAS oncogene family // 5q13 // 115827	AK094685 // NONCODE // accn=AK094685 class=mRNAlike lncRNA name=Human lncRNA ref=JounralRNA transcriptId=2933 cpcScore=-1.3034900 cnci=-0.3470016 // chr5 // 100 // 100 // 0 // --- // 0 /// uc003jrq.2 // NONCODE // accn=NULL class=lncRNA name= ref=UCSCGeneNoncode transcriptId=uc003jrq.2 cpcScore=-1.2880900 cnci=-0.3639482 // chr5 // 100 // 100 // 0 // --- // 0
TC04002014.hg.1	-0.0368197	0.016422	0.000214666	no	-0.035545	0.0189802	0.00322189	no	-3.46208	4	+	53578595	53586827	53578595	DANCR	BC045566 // DANCR // differentiation antagonizing non-protein coding RNA // 4q12 // 57291 /// ENST00000411630 // DANCR // differentiation antagonizing non-protein coding RNA // 4q12 // 57291 /// ENST00000425653 // DANCR // differentiation antagonizing non-protein coding RNA // 4q12 // 57291 /// ENST00000441504 // DANCR // differentiation antagonizing non-protein coding RNA // 4q12 // 57291 /// EN…	BC045566 // NONCODE // accn=BC045566 class=mRNAlike lncRNA name=Human lncRNA ref=JounralRNA transcriptId=2504 cpcScore=1.2499800 cnci=-0.2344202 // chr4 // 100 // 100 // 0 // --- // 0 /// ENST00000411630 // NONCODE // differentiation antagonizing non-protein coding RNA [gene_biotype:processed_transcript transcript_biotype:lincRNA] // chr4 // 100 // 100 // 0 // --- // 0 /// ENST00000425653 // NONC…
TC09002233.hg.1	0.0838592	0.0215538	0.000156423	no	0.076929	0.0170181	0.00422838	no	-8.26411	9	+	123555775	123561009	123555775		---	TCONS_00015557 // NONCODE // accn=NULL class=lncRNA name=Human lincRNA ref=BodyMapLinc transcriptId=TCONS_00015557 cpcScore=0.7522110 cnci=-0.2251290 // chr9 // 100 // 100 // 0 // --- // 0 /// TCONS_00016681 // NONCODE // accn=NULL class=lncRNA name=Human lincRNA ref=BodyMapLinc transcriptId=TCONS_00016681 cpcScore=-1.3059100 cnci=-0.3383006 // chr9 // 100 // 100 // 0 // --- // 0
TC03003404.hg.1	-0.0640358	0.0951129	3.41037e-06	no	-0.0460942	0.0352971	0.00635201	no	-28.0181	3	+	46653925	46668033	46653925	TDGF1	ENST00000444264 // TDGF1 // teratocarcinoma-derived growth factor 1 // 3p21.31 // 6997 /// OTTHUMT00000344228 // TDGF1 // teratocarcinoma-derived growth factor 1 // 3p21.31 // 6997	ENST00000444264 // ENSEMBL // teratocarcinoma-derived growth factor 1 [gene_biotype:protein_coding transcript_biotype:processed_transcript] // chr3 // 100 // 100 // 0 // --- // 0 /// OTTHUMT00000344228 // Havana transcript // teratocarcinoma-derived growth factor 1[gene_biotype:protein_coding transcript_biotype:processed_transcript] // chr3 // 100 // 100 // 0 // --- // 0 /// NM_001195442 // RefSe…
TC04000297.hg.1	-0.0437811	0.0395091	0.000170982	no	-0.0386388	0.00978656	0.0063549	no	-11.7455	4	+	53578597	53586518	53578597	DANCR	NR_024031 // DANCR // differentiation antagonizing non-protein coding RNA // 4q12 // 57291 /// ENST00000411630 // DANCR // differentiation antagonizing non-protein coding RNA // 4q12 // 57291 /// ENST00000411630 // DANCR // differentiation antagonizing non-protein coding RNA // 4q12 // 57291 /// uc003gzo.2 // DANCR // differentiation antagonizing non-protein coding RNA // 4q12 // 57291	NR_024031 // RefSeq // Homo sapiens differentiation antagonizing non-protein coding RNA (DANCR), long non-coding RNA. // chr4 // 100 // 100 // 0 // --- // 0 /// ENST00000411630 // ENSEMBL // differentiation antagonizing non-protein coding RNA [gene_biotype:processed_transcript transcript_biotype:lincRNA] // chr4 // 100 // 100 // 0 // --- // 0 /// ENST00000411630 // NONCODE // differentiation anta…
TC07002460.hg.1	0.0872994	0.0232068	0.000175184	no	0.0731833	0.00700158	0.00818699	no	-16.1697	7	+	92167789	92169077	92167789		---	uc011khv.1 // NONCODE // accn=NULL class=lncRNA name= ref=UCSCGeneNoncode transcriptId=uc011khv.1 cpcScore=-0.1643290 cnci=-0.3152585 // chr7 // 100 // 100 // 0 // --- // 0
1Transcript cluster.
2Percentage change of the effect comparing sustained vs any maternal smoking in pregnancy [Sign(Max(βSust;βAny))*(βSust. - βAny)/|βAny|*100].
3Transcription strat site.

## Sheet: TS7
Table S7. Association between maternal smoking in pregnancy and child blood expression levels of genes within ± 500 kb of significant CpGs, ordered by p-value of sustained maternal smoking in pregnancy
Associations with 470 TCs (genes) located within +-500 kb of 41 candidate CpGs are shown
		Any maternal smoking in pregnancy				Sustained maternal smoking in pregnancy
Locus	TC1	Log2FC	SE	P-value	Adj. P-value	Log2FC	SE	P-value	Adj. P-value	% change2	seqname	strand	start	stop	TSS3	GeneSymbol	gene_assignment	mrna_assignment
14	TC09000798.hg.1	0.0209415	0.0182943	0.0135038	no	0.036402	0.006079	0.00038376	no	73.8271	9	+	138437985	138441815	138437985	OBP2A	NM_014582 // OBP2A // odorant binding protein 2A // 9q34 // 29991 /// ENST00000340780 // OBP2A // odorant binding protein 2A // 9q34 // 29991 /// ENST00000342114 // OBP2A // odorant binding protein 2A // 9q34 // 29991 /// ENST00000371776 // OBP2A // odorant binding protein 2A // 9q34 // 29991 /// ENST00000539850 // OBP2A // odorant binding protein 2A // 9q34 // 29991 /// AJ251022 // OBP2A // odor…	NM_014582 // RefSeq // Homo sapiens odorant binding protein 2A (OBP2A), transcript variant alpha, mRNA. // chr9 // 100 // 100 // 0 // --- // 0 /// ENST00000340780 // ENSEMBL // odorant binding protein 2A [gene_biotype:protein_coding transcript_biotype:protein_coding] // chr9 // 100 // 100 // 0 // --- // 0 /// ENST00000342114 // ENSEMBL // odorant binding protein 2A [gene_biotype:protein_coding tr…
8	TC06000391.hg.1	0.0164998	0.0151069	0.00509977	no	0.0224302	0.0128282	0.00171035	no	35.9426	6	+	31973359	31976712	31973359	CYP21A2;CYP21A1P	NM_000500 // CYP21A2 // cytochrome P450, family 21, subfamily A, polypeptide 2 // 6p21.3 // 1589 /// NM_001128590 // CYP21A2 // cytochrome P450, family 21, subfamily A, polypeptide 2 // 6p21.3 // 1589 /// NR_040090 // CYP21A1P // cytochrome P450, family 21, subfamily A, polypeptide 1 pseudogene // 6p21.3 // 1590 /// AM183951 // CYP21A2 // cytochrome P450, family 21, subfamily A, polypeptide 2 // …	NM_000500 // RefSeq // Homo sapiens cytochrome P450, family 21, subfamily A, polypeptide 2 (CYP21A2), transcript variant 1, mRNA. // chr6 // 100 // 100 // 0 // --- // 0 /// NM_001128590 // RefSeq // Homo sapiens cytochrome P450, family 21, subfamily A, polypeptide 2 (CYP21A2), transcript variant 2, mRNA. // chr6 // 100 // 100 // 0 // --- // 0 /// NR_040090 // RefSeq // Homo sapiens cytochrome P45…
8	TC06000393.hg.1	0.0171859	0.0157073	0.00100802	no	0.0181754	0.0103798	0.00379803	no	5.75746	6	+	32006042	32009447	32006042	CYP21A2	NM_000500 // CYP21A2 // cytochrome P450, family 21, subfamily A, polypeptide 2 // 6p21.3 // 1589 /// NM_001128590 // CYP21A2 // cytochrome P450, family 21, subfamily A, polypeptide 2 // 6p21.3 // 1589 /// ENST00000418967 // CYP21A2 // cytochrome P450, family 21, subfamily A, polypeptide 2 // 6p21.3 // 1589 /// ENST00000435122 // CYP21A2 // cytochrome P450, family 21, subfamily A, polypeptide 2 //…	NM_000500 // RefSeq // Homo sapiens cytochrome P450, family 21, subfamily A, polypeptide 2 (CYP21A2), transcript variant 1, mRNA. // chr6 // 100 // 100 // 0 // --- // 0 /// NM_001128590 // RefSeq // Homo sapiens cytochrome P450, family 21, subfamily A, polypeptide 2 (CYP21A2), transcript variant 2, mRNA. // chr6 // 100 // 100 // 0 // --- // 0 /// ENST00000418967 // ENSEMBL // cytochrome P450, fam…
14	TC09001716.hg.1	0.0231105	0.0139793	0.0651892	no	0.0425251	0.0127257	0.00483111	no	84.0077	9	-	138395119	138398293	138398293	LOC101928525	ENST00000415062 // LOC101928525 // uncharacterized LOC101928525 // 9q34.3 // 101928525 /// BC015688 // LOC101928525 // uncharacterized LOC101928525 // 9q34.3 // 101928525	ENST00000415062 // ENSEMBL // havana:known chromosome:GRCh38:9:135503273:135506447:-1 gene:ENSG00000226706 gene_biotype:antisense transcript_biotype:antisense // chr9 // 100 // 100 // 0 // --- // 0 /// BC015688 // NONCODE // accn=BC015688 class=mRNAlike lncRNA name=Human lncRNA ref=JounralRNA transcriptId=4283 cpcScore=4.6114000 cnci=-0.1108077 // chr9 // 100 // 100 // 0 // --- // 0 /// OTTHUMT00…
2	TC01002759.hg.1	-0.0357824	0.0106126	0.00100899	no	-0.03732	0.0170833	0.00532283	no	4.29711	1	-	67873493	67896123	67896123	SERBP1	NM_001018067 // SERBP1 // SERPINE1 mRNA binding protein 1 // 1p31 // 26135 /// NM_001018068 // SERBP1 // SERPINE1 mRNA binding protein 1 // 1p31 // 26135 /// NM_001018069 // SERBP1 // SERPINE1 mRNA binding protein 1 // 1p31 // 26135 /// NM_015640 // SERBP1 // SERPINE1 mRNA binding protein 1 // 1p31 // 26135 /// ENST00000361219 // SERBP1 // SERPINE1 mRNA binding protein 1 // 1p31 // 26135 /// ENST…	NM_001018067 // RefSeq // Homo sapiens SERPINE1 mRNA binding protein 1 (SERBP1), transcript variant 1, mRNA. // chr1 // 100 // 100 // 0 // --- // 0 /// NM_001018068 // RefSeq // Homo sapiens SERPINE1 mRNA binding protein 1 (SERBP1), transcript variant 2, mRNA. // chr1 // 100 // 100 // 0 // --- // 0 /// NM_001018069 // RefSeq // Homo sapiens SERPINE1 mRNA binding protein 1 (SERBP1), transcript var…
4	TC02000634.hg.1	0.012517	0.014774	0.148541	no	0.0287	0.019551	0.00574041	no	129.289	2	+	105049725	105137290	105049725	LINC01102	NR_015399 // LINC01102 // long intergenic non-protein coding RNA 1102 // 2q12.1 // 150568 /// ENST00000447380 // LINC01102 // long intergenic non-protein coding RNA 1102 // 2q12.1 // 150568	NR_015399 // RefSeq // Homo sapiens long intergenic non-protein coding RNA 1102 (LINC01102), long non-coding RNA. // chr2 // 100 // 100 // 0 // --- // 0 /// ENST00000447380 // ENSEMBL // long intergenic non-protein coding RNA 1102 [gene_biotype:lincRNA transcript_biotype:lincRNA] // chr2 // 100 // 100 // 0 // --- // 0 /// OTTHUMT00000329242 // Havana transcript // novel transcript[gene_biotype:li…
7	TC05000583.hg.1	-0.0297567	0.0192722	0.0629657	no	-0.0523815	0.0121959	0.0071934	no	76.0329	5	+	123791066	123795791	123791066		---	ENST00000502809 // ENSEMBL // havana:known chromosome:GRCh38:5:124455373:124460098:1 gene:ENSG00000248600 gene_biotype:lincRNA transcript_biotype:lincRNA // chr5 // 100 // 100 // 0 // --- // 0 /// OTTHUMT00000372363 // Havana transcript // novel transcript[gene_biotype:lincRNA transcript_biotype:lincRNA] // chr5 // 100 // 100 // 0 // --- // 0
14	TC09000790.hg.1	0.0274162	0.0122072	0.00274222	no	0.0296552	0.0107596	0.00731675	no	8.1668	9	+	137967089	138013030	137967089	OLFM1	NM_006334 // OLFM1 // olfactomedin 1 // 9q34.3 // 10439 /// NM_014279 // OLFM1 // olfactomedin 1 // 9q34.3 // 10439 /// ENST00000252854 // OLFM1 // olfactomedin 1 // 9q34.3 // 10439 /// ENST00000277415 // OLFM1 // olfactomedin 1 // 9q34.3 // 10439 /// ENST00000371793 // OLFM1 // olfactomedin 1 // 9q34.3 // 10439 /// ENST00000371796 // OLFM1 // olfactomedin 1 // 9q34.3 // 10439 /// ENST00000371799…	NM_006334 // RefSeq // Homo sapiens olfactomedin 1 (OLFM1), transcript variant 2, mRNA. // chr9 // 100 // 100 // 0 // --- // 0 /// NM_014279 // RefSeq // Homo sapiens olfactomedin 1 (OLFM1), transcript variant 1, mRNA. // chr9 // 100 // 100 // 0 // --- // 0 /// ENST00000252854 // ENSEMBL // olfactomedin 1 [gene_biotype:protein_coding transcript_biotype:protein_coding] // chr9 // 100 // 100 // 0 /…
8	TC06003600.hg.1	0.0480551	0.0199102	0.00485146	no	0.0538163	0.0197987	0.00885419	no	11.9888	6	-	32372815	32374907	32374907	BTNL2	AY684333 // BTNL2 // butyrophilin-like 2 // 6p21.3 // 56244	AY684333 // NONCODE // accn=AY684333 class=mRNAlike lncRNA name=NULL ref=H-invitational v7.5 transcriptId=HIT000257116_04 cpcScore=1.4102900 cnci=-0.0780456 // chr6 // 100 // 100 // 0 // --- // 0
10	TC07001349.hg.1	-0.0211622	0.0153193	0.0447272	no	-0.0316425	0.0225126	0.0115493	no	49.5242	7	-	45022627	45026259	45026259	SNORA9;SNHG15	NR_002952 // SNORA9 // small nucleolar RNA, H/ACA box 9 // 7p13 // 677798 /// NR_003697 // SNHG15 // small nucleolar RNA host gene 15 // 7p13 // 285958 /// ENST00000384215 // SNORA9 // small nucleolar RNA, H/ACA box 9 // 7p13 // 677798 /// AK096179 // SNHG15 // small nucleolar RNA host gene 15 // 7p13 // 285958 /// NR_002952 // SNORA9 // small nucleolar RNA, H/ACA box 9 // 7p13 // 677798 /// uc00…	NR_002952 // RefSeq // Homo sapiens small nucleolar RNA, H/ACA box 9 (SNORA9), small nucleolar RNA. // chr7 // 100 // 100 // 0 // --- // 0 /// NR_003697 // RefSeq // Homo sapiens small nucleolar RNA host gene 15 (SNHG15), long non-coding RNA. // chr7 // 100 // 100 // 0 // --- // 0 /// ENST00000384215 // ENSEMBL // small nucleolar RNA, H/ACA box 9 [gene_biotype:snoRNA transcript_biotype:snoRNA] //…
8	TC06004050.hg.1	-0.0196913	0.00602541	0.0994796	no	-0.0362162	0.0283171	0.0120338	no	83.9194	6	-	32152510	32157963	32157963	PBX2	NM_002586 // PBX2 // pre-B-cell leukemia homeobox 2 // 6p21.3 // 5089 /// BC082261 // PBX2 // pre-B-cell leukemia homeobox 2 // 6p21.3 // 5089 /// BT009823 // PBX2 // pre-B-cell leukemia homeobox 2 // 6p21.3 // 5089 /// OTTHUMT00000076194 // PBX2 // pre-B-cell leukemia homeobox 2 // 6p21.3 // 5089 /// OTTHUMT00000076195 // PBX2 // pre-B-cell leukemia homeobox 2 // 6p21.3 // 5089 /// OTTHUMT000002…	NM_002586 // RefSeq // Homo sapiens pre-B-cell leukemia homeobox 2 (PBX2), mRNA. // chr6 // 100 // 100 // 0 // --- // 0 /// BC082261 // GenBank // Homo sapiens pre-B-cell leukemia homeobox 2, mRNA (cDNA clone MGC:99466 IMAGE:6425904), complete cds. // chr6 // 100 // 100 // 0 // --- // 0 /// BT009823 // GenBank // Homo sapiens pre-B-cell leukemia transcription factor 2 mRNA, complete cds. // chr6 …
8	TC06001535.hg.1	-0.0259307	0.00650003	0.00261901	no	-0.0256578	0.0192945	0.0133335	no	-1.05255	6	-	31644461	31651817	31651817	LY6G5C	NM_025262 // LY6G5C // lymphocyte antigen 6 complex, locus G5C // 6p21.33 // 80741 /// ENST00000383237 // LY6G5C // lymphocyte antigen 6 complex, locus G5C // 6p21.33 // 80741 /// AJ315540 // LY6G5C // lymphocyte antigen 6 complex, locus G5C // 6p21.33 // 80741 /// AJ315541 // LY6G5C // lymphocyte antigen 6 complex, locus G5C // 6p21.33 // 80741 /// OTTHUMT00000076471 // LY6G5C // lymphocyte anti…	NM_025262 // RefSeq // Homo sapiens lymphocyte antigen 6 complex, locus G5C (LY6G5C), mRNA. // chr6 // 100 // 100 // 0 // --- // 0 /// ENST00000383237 // ENSEMBL // lymphocyte antigen 6 complex, locus G5C [gene_biotype:protein_coding transcript_biotype:protein_coding] // chr6 // 100 // 100 // 0 // --- // 0 /// AJ315540 // GenBank // Homo sapiens mRNA for truncated LY6G5C protein, (LY6G5C gene), s…
17	TC15000684.hg.1	0.026099	0.00661373	0.0057351	no	0.0282406	0.0257618	0.0134949	no	8.20564	15	+	75041184	75048941	75041184	CYP1A2	NM_000761 // CYP1A2 // cytochrome P450, family 1, subfamily A, polypeptide 2 // 15q24.1 // 1544 /// ENST00000343932 // CYP1A2 // cytochrome P450, family 1, subfamily A, polypeptide 2 // 15q24.1 // 1544 /// BC067424 // CYP1A2 // cytochrome P450, family 1, subfamily A, polypeptide 2 // 15q24.1 // 1544 /// uc002ayr.1 // CYP1A2 // cytochrome P450, family 1, subfamily A, polypeptide 2 // 15q24.1 // 15…	NM_000761 // RefSeq // Homo sapiens cytochrome P450, family 1, subfamily A, polypeptide 2 (CYP1A2), mRNA. // chr15 // 100 // 100 // 0 // --- // 0 /// ENST00000343932 // ENSEMBL // cytochrome P450, family 1, subfamily A, polypeptide 2 [gene_biotype:protein_coding transcript_biotype:protein_coding] // chr15 // 100 // 100 // 0 // --- // 0 /// BC067424 // GenBank // Homo sapiens cytochrome P450, fami…
6	TC05000006.hg.1	-0.0136353	0.0206657	0.0904372	no	-0.0236919	0.0455522	0.0143193	no	73.7537	5	+	443273	472052	443273	EXOC3	NM_007277 // EXOC3 // exocyst complex component 3 // 5p15.33 // 11336 /// ENST00000315013 // EXOC3 // exocyst complex component 3 // 5p15.33 // 11336 /// ENST00000510441 // EXOC3 // exocyst complex component 3 // 5p15.33 // 11336 /// ENST00000512944 // EXOC3 // exocyst complex component 3 // 5p15.33 // 11336 /// AK074086 // EXOC3 // exocyst complex component 3 // 5p15.33 // 11336 /// BC064569 // …	NM_007277 // RefSeq // Homo sapiens exocyst complex component 3 (EXOC3), mRNA. // chr5 // 100 // 100 // 0 // --- // 0 /// ENST00000315013 // ENSEMBL // exocyst complex component 3 [gene_biotype:protein_coding transcript_biotype:protein_coding] // chr5 // 100 // 100 // 0 // --- // 0 /// ENST00000510441 // ENSEMBL // exocyst complex component 3 [gene_biotype:protein_coding transcript_biotype:proces…
17	TC15001652.hg.1	-0.0367713	0.00817805	0.0162545	no	-0.045752	0.0294397	0.014598	no	24.423	15	-	75212132	75230509	75230509	COX5A	NM_004255 // COX5A // cytochrome c oxidase subunit Va // 15q24.1 // 9377 /// ENST00000322347 // COX5A // cytochrome c oxidase subunit Va // 15q24.1 // 9377 /// BC024240 // COX5A // cytochrome c oxidase subunit Va // 15q24.1 // 9377 /// OTTHUMT00000286417 // COX5A // cytochrome c oxidase subunit Va // 15q24.1 // 9377 /// uc002azi.4 // COX5A // cytochrome c oxidase subunit Va // 15q24.1 // 9377	NM_004255 // RefSeq // Homo sapiens cytochrome c oxidase subunit Va (COX5A), mRNA. // chr15 // 100 // 100 // 0 // --- // 0 /// ENST00000322347 // ENSEMBL // cytochrome c oxidase subunit Va [gene_biotype:protein_coding transcript_biotype:protein_coding] // chr15 // 100 // 100 // 0 // --- // 0 /// BC024240 // GenBank // Homo sapiens cytochrome c oxidase subunit Va, mRNA (cDNA clone MGC:33109 IMAGE:…
14	TC09002844.hg.1	0.039919	0.00946225	0.0313028	no	0.053011	0.0164103	0.018501	no	32.7964	9	-	137711261	137764464	137764464	LOC101448202	BC058547 // LOC101448202 // uncharacterized LOC101448202 // 9q34.3 // 101448202	BC058547 // NONCODE // accn=BC058547 class=mRNAlike lncRNA name=Human lncRNA ref=JounralRNA transcriptId=4281 cpcScore=-0.9054490 cnci=-0.1543043 // chr9 // 100 // 100 // 0 // --- // 0
14	TC09001711.hg.1	-0.025474	0.02496	0.0692367	no	-0.0388198	0.031318	0.0212518	no	52.3897	9	-	138096568	138129443	138129443		---	ENST00000452377 // ENSEMBL // havana:known chromosome:GRCh38:9:135204722:135237597:-1 gene:ENSG00000227958 gene_biotype:lincRNA transcript_biotype:lincRNA // chr9 // 100 // 100 // 0 // --- // 0 /// OTTHUMT00000054979 // NONCODE // Putative novel transcript[gene_biotype:lincRNA transcript_biotype:lincRNA] // chr9 // 100 // 100 // 0 // --- // 0
11	TC07003008.hg.1	-0.0140877	0.0135433	0.0776749	no	-0.0219046	0.0149796	0.0239424	no	55.487	7	-	69057888	69063004	69063004		---	TCONS_00013193 // NONCODE // accn=NULL class=lncRNA name=Human lincRNA ref=BodyMapLinc transcriptId=TCONS_00013193 cpcScore=-1.1166300 cnci=-0.2231892 // chr7 // 100 // 100 // 0 // --- // 0 /// TCONS_00013859 // NONCODE // accn=NULL class=lncRNA name=Human lincRNA ref=BodyMapLinc transcriptId=TCONS_00013859 cpcScore=-1.2481900 cnci=-0.3613924 // chr7 // 100 // 100 // 0 // --- // 0 /// TCONS_00013…
17	TC15000686.hg.1	-0.00943244	0.0107177	0.0245903	no	-0.0112909	0.00434363	0.0260207	no	19.7027	15	+	75105057	75124143	75105057	CPLX3;LMAN1L	NM_001030005 // CPLX3 // complexin 3 // 15q24.1 // 594855 /// NM_021819 // LMAN1L // lectin, mannose-binding, 1 like // 15q24.1 // 79748 /// ENST00000309664 // LMAN1L // lectin, mannose-binding, 1 like // 15q24.1 // 79748 /// ENST00000379709 // LMAN1L // lectin, mannose-binding, 1 like // 15q24.1 // 79748 /// ENST00000395018 // CPLX3 // complexin 3 // 15q24.1 // 594855 /// ENST00000456603 // LMAN…	NM_001030005 // RefSeq // Homo sapiens complexin 3 (CPLX3), mRNA. // chr15 // 100 // 100 // 0 // --- // 0 /// NM_021819 // RefSeq // Homo sapiens lectin, mannose-binding, 1 like (LMAN1L), mRNA. // chr15 // 100 // 100 // 0 // --- // 0 /// ENST00000309664 // ENSEMBL // lectin, mannose-binding, 1 like [gene_biotype:protein_coding transcript_biotype:protein_coding] // chr15 // 100 // 100 // 0 // --- …
8	TC06004145.hg.1	-0.0212288	0.00806943	0.00463786	no	-0.0198711	0.0128677	0.0267841	no	-6.39559	6	-	32116136	32119729	32119729	PRRT1	NM_030651 // PRRT1 // proline-rich transmembrane protein 1 // 6p21.32 // 80863 /// ENST00000211413 // PRRT1 // proline-rich transmembrane protein 1 // 6p21.32 // 80863 /// ENST00000467780 // PRRT1 // proline-rich transmembrane protein 1 // 6p21.32 // 80863 /// AK123424 // PRRT1 // proline-rich transmembrane protein 1 // 6p21.32 // 80863 /// BC063046 // PRRT1 // proline-rich transmembrane protein …	NM_030651 // RefSeq // Homo sapiens proline-rich transmembrane protein 1 (PRRT1), mRNA. // chr6 // 100 // 100 // 0 // --- // 0 /// ENST00000211413 // ENSEMBL // proline-rich transmembrane protein 1 [gene_biotype:protein_coding transcript_biotype:protein_coding] // chr6 // 100 // 100 // 0 // --- // 0 /// ENST00000467780 // ENSEMBL // proline-rich transmembrane protein 1 [gene_biotype:protein_codin…
6	TC05002798.hg.1	0.0338877	0.00995317	0.133508	no	0.0594895	0.00747792	0.0295649	no	75.549	5	-	553527	554002	554002		---	TCONS_00010227 // NONCODE // accn=NULL class=lncRNA name=Human lincRNA ref=BodyMapLinc transcriptId=TCONS_00010227 cpcScore=-1.0733200 cnci=-0.4906488 // chr5 // 100 // 100 // 0 // --- // 0
18	TC21000420.hg.1	0.0166855	0.0185581	0.00996505	no	0.016664	0.0104803	0.0334832	no	-0.128822	21	-	35885440	35987441	35987441	RCAN1	NM_004414 // RCAN1 // regulator of calcineurin 1 // 21q22.12 // 1827 /// NM_203417 // RCAN1 // regulator of calcineurin 1 // 21q22.12 // 1827 /// NM_203418 // RCAN1 // regulator of calcineurin 1 // 21q22.12 // 1827 /// ENST00000313806 // RCAN1 // regulator of calcineurin 1 // 21q22.12 // 1827 /// ENST00000381132 // RCAN1 // regulator of calcineurin 1 // 21q22.12 // 1827 /// ENST00000381135 // RCA…	NM_004414 // RefSeq // Homo sapiens regulator of calcineurin 1 (RCAN1), transcript variant 1, mRNA. // chr21 // 100 // 100 // 0 // --- // 0 /// NM_203417 // RefSeq // Homo sapiens regulator of calcineurin 1 (RCAN1), transcript variant 2, mRNA. // chr21 // 100 // 100 // 0 // --- // 0 /// NM_203418 // RefSeq // Homo sapiens regulator of calcineurin 1 (RCAN1), transcript variant 3, mRNA. // chr21 //…
8	TC06001568.hg.1	0.0371731	0.0076872	0.0567802	no	0.0504806	0.0409321	0.0334988	no	35.7987	6	-	32517717	32517867	32517867		---	ENST00000516107 // ENSEMBL // RNA, U1 small nuclear 61, pseudogene [gene_biotype:snRNA transcript_biotype:snRNA] // chr6 // 100 // 100 // 0 // --- // 0
8	TC06004074.hg.1	-0.0217064	0.0158156	0.0343875	no	-0.0266735	0.0274441	0.0345399	no	22.8834	6	+	31633013	31637847	31633013	CSNK2B	NM_001320 // CSNK2B // casein kinase 2, beta polypeptide // 6p21.3 // 1460 /// ENST00000375865 // CSNK2B // casein kinase 2, beta polypeptide // 6p21.3 // 1460 /// ENST00000375866 // CSNK2B // casein kinase 2, beta polypeptide // 6p21.3 // 1460 /// ENST00000375882 // CSNK2B // casein kinase 2, beta polypeptide // 6p21.3 // 1460 /// ENST00000375885 // CSNK2B // casein kinase 2, beta polypeptide //…	NM_001320 // RefSeq // Homo sapiens casein kinase 2, beta polypeptide (CSNK2B), transcript variant 1, mRNA. // chr6 // 100 // 100 // 0 // --- // 0 /// ENST00000375865 // ENSEMBL // casein kinase 2, beta polypeptide [gene_biotype:protein_coding transcript_biotype:protein_coding] // chr6 // 100 // 100 // 0 // --- // 0 /// ENST00000375866 // ENSEMBL // casein kinase 2, beta polypeptide [gene_biotype…
17	TC15000682.hg.1	-0.00896222	0.00826696	0.276522	no	-0.0209649	0.0122355	0.0356358	no	133.925	15	+	74833518	74890472	74833518	ARID3B	NM_006465 // ARID3B // AT rich interactive domain 3B (BRIGHT-like) // 15q24 // 10620 /// ENST00000346246 // ARID3B // AT rich interactive domain 3B (BRIGHT-like) // 15q24 // 10620 /// BC041792 // ARID3B // AT rich interactive domain 3B (BRIGHT-like) // 15q24 // 10620 /// BC060824 // ARID3B // AT rich interactive domain 3B (BRIGHT-like) // 15q24 // 10620 /// OTTHUMT00000280688 // ARID3B // AT rich…	NM_006465 // RefSeq // Homo sapiens AT rich interactive domain 3B (BRIGHT-like) (ARID3B), transcript variant 2, mRNA. // chr15 // 100 // 100 // 0 // --- // 0 /// ENST00000346246 // ENSEMBL // AT rich interactive domain 3B (BRIGHT-like) [gene_biotype:protein_coding transcript_biotype:protein_coding] // chr15 // 100 // 100 // 0 // --- // 0 /// BC041792 // GenBank // Homo sapiens AT rich interactive…
14	TC09001717.hg.1	0.0600461	0.0219758	0.0212468	no	0.0651366	0.0104654	0.0383191	no	8.47777	9	-	138420457	138420546	138420546		---	ENST00000408686 // ENSEMBL // ncrna:novel chromosome:GRCh38:9:135528611:135528700:-1 gene:ENSG00000221613 gene_biotype:miRNA transcript_biotype:miRNA // chr9 // 100 // 100 // 0 // --- // 0
14	TC09002845.hg.1	-0.0235757	0.0116989	0.090883	no	-0.0345935	0.0260629	0.0389857	no	46.7338	9	-	138096568	138129443	138129443		---	TCONS_00015893 // NONCODE // accn=NULL class=lncRNA name=Human lincRNA ref=BodyMapLinc transcriptId=TCONS_00015893 cpcScore=-1.1266500 cnci=-0.2230569 // chr9 // 100 // 100 // 0 // --- // 0
10	TC07002925.hg.1	-0.0172513	0.00582687	0.101309	no	-0.0261138	0.019982	0.0392052	no	51.373	7	-	45022627	45026259	45026259		---	linc_luo_207 // NONCODE // accn=NULL class=lincRNA name=Human lincRNA ref=Scripture Reconstruction LincRNAs By Luo transcriptId=linc_luo_207 cpcScore=-1.3034800 cnci=-0.2045130 // chr7 // 100 // 100 // 0 // --- // 0 /// uc003tmk.3 // NONCODE // accn=NULL class=lncRNA name= ref=UCSCGeneNoncode transcriptId=uc003tmk.3 cpcScore=3.0196800 cnci=-0.2864811 // chr7 // 100 // 100 // 0 // --- // 0 /// uc0…
1	TC01004375.hg.1	0.0335492	0.0155008	0.0652935	no	0.0448348	0.0174916	0.0421447	no	33.6389	1	+	50723329	50723876	50723329		---	TCONS_00000933 // NONCODE // accn=NULL class=lncRNA name=Human lincRNA ref=BodyMapLinc transcriptId=TCONS_00000933 cpcScore=-1.2553700 cnci=-0.2738307 // chr1 // 100 // 100 // 0 // --- // 0
18	TC21000141.hg.1	0.0408275	0.00569221	0.167081	no	0.0742668	0.0272294	0.0421813	no	81.9037	21	+	36231771	36231871	36231771		---	uc002yus.1 // UCSC Genes // Sequence 7 from Patent WO03062423. // chr21 // 100 // 100 // 0 // --- // 0
6	TC05000007.hg.1	-0.0236681	0.00812406	0.0337535	no	-0.027161	0.0100612	0.0429766	no	14.758	5	+	478238	480999	478238	LOC100288152	ENST00000431004 // LOC100288152 // uncharacterized LOC100288152 // 5p15.33 // 100288152 /// BC013821 // LOC100288152 // uncharacterized LOC100288152 // 5p15.33 // 100288152	ENST00000431004 // ENSEMBL // cdna:known chromosome:GRCh37:5:478238:479604:1 gene:ENSG00000225138 gene_biotype:antisense transcript_biotype:antisense // chr5 // 100 // 100 // 0 // --- // 0 /// BC013821 // GenBank // Homo sapiens cDNA clone IMAGE:4346813, partial cds. // chr5 // 100 // 100 // 0 // --- // 0 /// ENST00000534918 // ENSEMBL // havana:known chromosome:GRCh38:5:478123:480884:1 gene:ENSG…
17	TC15001650.hg.1	-0.0216592	0.0240075	0.1399	no	-0.0353699	0.0218415	0.0441903	no	63.3021	15	-	75136071	75165719	75165719	SCAMP2	NM_005697 // SCAMP2 // secretory carrier membrane protein 2 // 15q23-q25 // 10066 /// ENST00000268099 // SCAMP2 // secretory carrier membrane protein 2 // 15q23-q25 // 10066 /// AK096376 // SCAMP2 // secretory carrier membrane protein 2 // 15q23-q25 // 10066 /// BC001376 // SCAMP2 // secretory carrier membrane protein 2 // 15q23-q25 // 10066 /// BC004385 // SCAMP2 // secretory carrier membrane pr…	NM_005697 // RefSeq // Homo sapiens secretory carrier membrane protein 2 (SCAMP2), mRNA. // chr15 // 100 // 100 // 0 // --- // 0 /// ENST00000268099 // ENSEMBL // secretory carrier membrane protein 2 [gene_biotype:protein_coding transcript_biotype:protein_coding] // chr15 // 100 // 100 // 0 // --- // 0 /// AK096376 // GenBank // Homo sapiens cDNA FLJ39057 fis, clone NT2RP7013374, highly similar t…
1	TC01002645.hg.1	-0.0492905	0.045271	0.0845331	no	-0.0678991	0.0126766	0.0482358	no	37.7531	1	-	50965430	50965529	50965529		---	ENST00000365270 // ENSEMBL // ncrna:misc_RNA chromosome:GRCh37:1:50965430:50965529:-1 gene:ENSG00000202140 gene_biotype:misc_RNA transcript_biotype:misc_RNA // chr1 // 100 // 100 // 0 // --- // 0
4	TC02003466.hg.1	0.0182862	0.0131182	0.0772382	no	0.0237921	0.0165826	0.0511732	no	30.1099	2	+	105760571	105761882	105760571		---	TCONS_00002964 // NONCODE // accn=NULL class=lncRNA name=Human lincRNA ref=BodyMapLinc transcriptId=TCONS_00002964 cpcScore=-0.9199560 cnci=-0.1464470 // chr2 // 100 // 100 // 0 // --- // 0 /// TCONS_00002965 // NONCODE // accn=NULL class=lncRNA name=Human lincRNA ref=BodyMapLinc transcriptId=TCONS_00002965 cpcScore=-0.8926270 cnci=-0.1413111 // chr2 // 100 // 100 // 0 // --- // 0 /// TCONS_00002…
1	TC01002642.hg.1	0.0397476	0.016264	0.0267709	no	0.0420677	0.00984093	0.0531929	no	5.83713	1	-	50671756	50688799	50688799		---	ENST00000440897 // ENSEMBL // havana:known chromosome:GRCh38:1:50206084:50223127:-1 gene:ENSG00000233407 gene_biotype:antisense transcript_biotype:antisense // chr1 // 100 // 100 // 0 // --- // 0 /// OTTHUMT00000021721 // NONCODE // putative novel transcript[gene_biotype:antisense transcript_biotype:antisense] // chr1 // 100 // 100 // 0 // --- // 0
8	TC06004116.hg.1	-0.0073015	0.0152457	0.271535	no	-0.0150417	0.00753567	0.0558518	no	106.008	6	-	31654726	31671221	31671221	ABHD16A	NM_001177515 // ABHD16A // abhydrolase domain containing 16A // 6p21.3 // 7920 /// NM_021160 // ABHD16A // abhydrolase domain containing 16A // 6p21.3 // 7920 /// NR_033488 // ABHD16A // abhydrolase domain containing 16A // 6p21.3 // 7920 /// NR_033489 // ABHD16A // abhydrolase domain containing 16A // 6p21.3 // 7920 /// ENST00000395952 // ABHD16A // abhydrolase domain containing 16A // 6p21.3 //…	NM_001177515 // RefSeq // Homo sapiens abhydrolase domain containing 16A (ABHD16A), transcript variant 2, mRNA. // chr6 // 100 // 100 // 0 // --- // 0 /// NM_021160 // RefSeq // Homo sapiens abhydrolase domain containing 16A (ABHD16A), transcript variant 1, mRNA. // chr6 // 100 // 100 // 0 // --- // 0 /// NR_033488 // RefSeq // Homo sapiens abhydrolase domain containing 16A (ABHD16A), transcript …
13	TC08001853.hg.1	0.0288214	0.0081216	0.193383	no	0.0508912	0.00672533	0.0558739	no	76.5741	8	+	28428149	28431777	28428149		---	linc_luo_543 // NONCODE // accn=NULL class=lincRNA name=Human lincRNA ref=Scripture Reconstruction LincRNAs By Luo transcriptId=linc_luo_543 cpcScore=-1.3531100 cnci=-0.4263074 // chr8 // 100 // 100 // 0 // --- // 0
1	TC01005475.hg.1	0.0732821	0.00990434	0.0301282	no	0.0767814	0.0124814	0.0589224	no	4.77498	1	-	50444343	50461386	50461386		---	OTTHUMT00000021721 // NONCODE // putative novel transcript[gene_biotype:antisense transcript_biotype:antisense] // chr1 // 100 // 100 // 0 // --- // 0
7	TC05000588.hg.1	-0.0357389	0.0365409	0.0469968	no	-0.0405342	0.01664	0.0618877	no	13.4176	5	+	124056778	124057382	124056778		---	ENST00000515214 // ENSEMBL // cdna:known chromosome:GRCh37:5:124056778:124057382:1 gene:ENSG00000250843 gene_biotype:antisense transcript_biotype:antisense // chr5 // 100 // 100 // 0 // --- // 0
13	TC08002615.hg.1	0.00285161	0.0187149	0.731685	no	0.0189367	0.0154778	0.062348	no	564.068	8	-	28285925	28347835	28347835	FBXO16	NM_172366 // FBXO16 // F-box protein 16 // 8p21.1 // 157574 /// ENST00000346498 // FBXO16 // F-box protein 16 // 8p21.1 // 157574 /// ENST00000380254 // FBXO16 // F-box protein 16 // 8p21.1 // 157574 /// ENST00000517436 // FBXO16 // F-box protein 16 // 8p21.1 // 157574 /// ENST00000518734 // FBXO16 // F-box protein 16 // 8p21.1 // 157574 /// ENST00000519471 // FBXO16 // F-box protein 16 // 8p21.1…	NM_172366 // RefSeq // Homo sapiens F-box protein 16 (FBXO16), transcript variant 1, mRNA. // chr8 // 100 // 100 // 0 // --- // 0 /// ENST00000346498 // ENSEMBL // F-box protein 16 [gene_biotype:protein_coding transcript_biotype:protein_coding] // chr8 // 100 // 100 // 0 // --- // 0 /// ENST00000380254 // ENSEMBL // F-box protein 16 [gene_biotype:protein_coding transcript_biotype:protein_coding] …
18	TC21000425.hg.1	0.0327108	0.00768807	0.207353	no	0.0574939	0.0147478	0.0625716	no	75.7645	21	-	36410233	36411723	36411723	RUNX1-IT1	NR_026812 // RUNX1-IT1 // RUNX1 intronic transcript 1 // 21q22.12 // 80215 /// NR_026812 // RUNX1-IT1 // RUNX1 intronic transcript 1 // 21q22.12 // 80215 /// uc011adz.2 // RUNX1-IT1 // RUNX1 intronic transcript 1 // 21q22.12 // 80215	NR_026812 // RefSeq // Homo sapiens RUNX1 intronic transcript 1 (RUNX1-IT1), long non-coding RNA. // chr21 // 100 // 100 // 0 // --- // 0 /// NR_026812 // NONCODE // accn=NR_026812 class=lncRNA name= ref=RefGeneNoncode transcriptId=NR_026812 cpcScore=2.5941800 cnci=-0.2388349 // chr21 // 100 // 100 // 0 // --- // 0 /// uc011adz.2 // UCSC Genes // Homo sapiens RUNX1 intronic transcript 1 (non-prot…
17	TC15001645.hg.1	-0.0227366	0.0116604	0.219427	no	-0.0417144	0.016488	0.0628406	no	83.4681	15	-	74783299	74783372	74783372		---	ENST00000390977 // ENSEMBL // Small nucleolar RNA SNORD77 [gene_biotype:snoRNA transcript_biotype:snoRNA] // chr15 // 100 // 100 // 0 // --- // 0
8	TC06004076.hg.1	-0.0218753	0.0135879	0.0797801	no	-0.0277868	0.0205078	0.0635957	no	27.0237	6	+	31865562	31913449	31865562	C2	NM_000063 // C2 // complement component 2 // 6p21.3 // 717 /// NM_001145903 // C2 // complement component 2 // 6p21.3 // 717 /// NM_001178063 // C2 // complement component 2 // 6p21.3 // 717 /// ENST00000299367 // C2 // complement component 2 // 6p21.3 // 717 /// ENST00000418949 // C2 // complement component 2 // 6p21.3 // 717 /// ENST00000442278 // C2 // complement component 2 // 6p21.3 // 717 /…	NM_000063 // RefSeq // Homo sapiens complement component 2 (C2), transcript variant 1, mRNA. // chr6 // 100 // 100 // 0 // --- // 0 /// NM_001145903 // RefSeq // Homo sapiens complement component 2 (C2), transcript variant 2, mRNA. // chr6 // 100 // 100 // 0 // --- // 0 /// NM_001178063 // RefSeq // Homo sapiens complement component 2 (C2), transcript variant 3, mRNA. // chr6 // 100 // 100 // 0 /…
15	TC10001053.hg.1	0.00605373	0.0104786	0.377774	no	0.0152104	0.0264076	0.0675084	no	151.257	10	-	13685706	14504143	14504143	FRMD4A	NM_018027 // FRMD4A // FERM domain containing 4A // 10p13 // 55691 /// ENST00000342409 // FRMD4A // FERM domain containing 4A // 10p13 // 55691 /// ENST00000357447 // FRMD4A // FERM domain containing 4A // 10p13 // 55691 /// ENST00000358621 // FRMD4A // FERM domain containing 4A // 10p13 // 55691 /// ENST00000492155 // FRMD4A // FERM domain containing 4A // 10p13 // 55691 /// AK001072 // FRMD4A /…	NM_018027 // RefSeq // Homo sapiens FERM domain containing 4A (FRMD4A), mRNA. // chr10 // 100 // 100 // 0 // --- // 0 /// ENST00000342409 // ENSEMBL // FERM domain containing 4A [gene_biotype:protein_coding transcript_biotype:processed_transcript] // chr10 // 100 // 100 // 0 // --- // 0 /// ENST00000357447 // ENSEMBL // FERM domain containing 4A [gene_biotype:protein_coding transcript_biotype:pro…
4	TC02002162.hg.1	-0.0219852	0.0263913	0.060481	no	-0.0253003	0.0361372	0.0709503	no	15.0788	2	-	105421883	105469641	105469641	LINC01158	NR_037883 // LINC01158 // long intergenic non-protein coding RNA 1158 // 2q12 // 100506421 /// ENST00000413121 // LINC01158 // long intergenic non-protein coding RNA 1158 // 2q12 // 100506421 /// ENST00000443988 // LINC01158 // long intergenic non-protein coding RNA 1158 // 2q12 // 100506421 /// ENST00000447876 // LINC01158 // long intergenic non-protein coding RNA 1158 // 2q12 // 100506421 /// E…	NR_037883 // RefSeq // Homo sapiens long intergenic non-protein coding RNA 1158 (LINC01158), transcript variant 1, long non-coding RNA. // chr2 // 100 // 100 // 0 // --- // 0 /// ENST00000413121 // ENSEMBL // long intergenic non-protein coding RNA 1158 [gene_biotype:processed_transcript transcript_biotype:lincRNA] // chr2 // 100 // 100 // 0 // --- // 0 /// ENST00000443988 // ENSEMBL // long inter…
14	TC09002337.hg.1	-0.0166421	0.015176	0.149451	no	-0.0247695	0.0287125	0.0726024	no	48.8356	9	+	137645963	137647175	137645963		---	OTTHUMT00000331581 // NONCODE // novel transcript[gene_biotype:antisense transcript_biotype:antisense] // chr9 // 100 // 100 // 0 // --- // 0
7	TC05001731.hg.1	-0.0211488	0.0294386	0.0977548	no	-0.0279075	0.015414	0.0751508	no	31.9578	5	-	123972608	124084500	124084500	ZNF608	NM_020747 // ZNF608 // zinc finger protein 608 // 5q23.2 // 57507 /// ENST00000306315 // ZNF608 // zinc finger protein 608 // 5q23.2 // 57507 /// ENST00000504926 // ZNF608 // zinc finger protein 608 // 5q23.2 // 57507 /// ENST00000513985 // ZNF608 // zinc finger protein 608 // 5q23.2 // 57507 /// AK056247 // ZNF608 // zinc finger protein 608 // 5q23.2 // 57507 /// AL117587 // ZNF608 // zinc finge…	NM_020747 // RefSeq // Homo sapiens zinc finger protein 608 (ZNF608), mRNA. // chr5 // 100 // 100 // 0 // --- // 0 /// ENST00000306315 // ENSEMBL // zinc finger protein 608 [gene_biotype:protein_coding transcript_biotype:protein_coding] // chr5 // 100 // 100 // 0 // --- // 0 /// ENST00000504926 // ENSEMBL // zinc finger protein 608 [gene_biotype:protein_coding transcript_biotype:protein_coding] /…
4	TC02000633.hg.1	-0.0050436	0.0159164	0.761056	no	-0.0351714	0.0283415	0.0782741	no	597.348	2	+	105027659	105032070	105027659		---	ENST00000416008 // ENSEMBL // havana:known chromosome:GRCh38:2:104411201:104415612:1 gene:ENSG00000227157 gene_biotype:lincRNA transcript_biotype:lincRNA // chr2 // 100 // 100 // 0 // --- // 0 /// OTTHUMT00000329239 // NONCODE // putative novel transcript[gene_biotype:lincRNA transcript_biotype:lincRNA] // chr2 // 100 // 100 // 0 // --- // 0
18	TC21000415.hg.1	-0.0147687	0.0172729	0.438731	no	-0.039962	0.0200046	0.0790656	no	170.585	21	-	35772615	35773370	35773370	C21orf140	ENST00000410005 // C21orf140 // chromosome 21 open reading frame 140 // --- // 101928147 /// OTTHUMT00000334702 // C21orf140 // chromosome 21 open reading frame 140 // --- // 101928147	ENST00000410005 // ENSEMBL // chromosome 21 open reading frame 140 [gene_biotype:protein_coding transcript_biotype:protein_coding] // chr21 // 100 // 100 // 0 // --- // 0 /// OTTHUMT00000334702 // Havana transcript // chromosome 21 open reading frame 140[gene_biotype:protein_coding transcript_biotype:protein_coding] // chr21 // 100 // 100 // 0 // --- // 0
16	TC15002471.hg.1	-0.129886	0.015922	0.0169788	no	-0.114921	0.0222052	0.0792559	no	-11.5217	15	-	33057747	33059570	33059570	FMN1	BC029107 // FMN1 // formin 1 // 15q13.3 // 342184	BC029107 // NONCODE // accn=BC029107 class=mRNAlike lncRNA name=Human lncRNA ref=JounralRNA transcriptId=67 cpcScore=-0.9119860 cnci=-0.3384311 // chr15 // 100 // 100 // 0 // --- // 0
10	TC07002922.hg.1	-0.0148687	0.00991004	0.294513	no	-0.0300751	0.0200758	0.0807677	no	102.271	7	-	44824649	44826939	44826939		---	TCONS_00013162 // NONCODE // accn=NULL class=lncRNA name=Human lincRNA ref=BodyMapLinc transcriptId=TCONS_00013162 cpcScore=-0.5718550 cnci=-0.2000149 // chr7 // 100 // 100 // 0 // --- // 0
9	TC07000046.hg.1	-0.0144506	0.0174613	0.417932	no	-0.0378819	0.0242676	0.0813165	no	162.147	7	+	4941587	4942384	4941587		---	AC092610 // NONCODE // accn=AC092610 class=Y RNA name=hY3 RNA ref=NONCODE v2.0 transcriptId=NULL cpcScore=-1.5040500 cnci=-1.0000000 // chr7 // 100 // 100 // 0 // --- // 0
7	TC05000593.hg.1	-0.0568341	0.0191901	0.0119787	no	-0.0471332	0.0158023	0.082583	no	-17.0688	5	+	124165165	124165983	124165165		---	ENST00000511091 // ENSEMBL // havana:known chromosome:GRCh38:5:124829472:124830290:1 gene:ENSG00000248443 gene_biotype:lincRNA transcript_biotype:lincRNA // chr5 // 100 // 100 // 0 // --- // 0 /// OTTHUMT00000371299 // Havana transcript // novel transcript[gene_biotype:lincRNA transcript_biotype:lincRNA] // chr5 // 100 // 100 // 0 // --- // 0
8	TC06001563.hg.1	0.0223709	0.0131973	0.062039	no	0.025314	0.0232326	0.0830889	no	13.1559	6	-	32158543	32163300	32163300	GPSM3	NM_022107 // GPSM3 // G-protein signaling modulator 3 // 6p21.3 // 63940 /// ENST00000375040 // GPSM3 // G-protein signaling modulator 3 // 6p21.3 // 63940 /// ENST00000375043 // GPSM3 // G-protein signaling modulator 3 // 6p21.3 // 63940 /// ENST00000487761 // GPSM3 // G-protein signaling modulator 3 // 6p21.3 // 63940 /// AK313922 // GPSM3 // G-protein signaling modulator 3 // 6p21.3 // 63940 /…	NM_022107 // RefSeq // Homo sapiens G-protein signaling modulator 3 (GPSM3), transcript variant 2, mRNA. // chr6 // 100 // 100 // 0 // --- // 0 /// ENST00000375040 // ENSEMBL // G-protein signaling modulator 3 [gene_biotype:protein_coding transcript_biotype:protein_coding] // chr6 // 100 // 100 // 0 // --- // 0 /// ENST00000375043 // ENSEMBL // G-protein signaling modulator 3 [gene_biotype:protei…
18	TC21000695.hg.1	0.0195247	0.029398	0.311945	no	0.0400766	0.00911913	0.0853486	no	105.261	21	+	36377027	36384582	36377027		---	OTTHUMT00000194629 // NONCODE // putative novel transcript[gene_biotype:lincRNA transcript_biotype:lincRNA] // chr21 // 100 // 100 // 0 // --- // 0
1	TC01000614.hg.1	0.00931269	0.0164408	0.118359	no	0.0122902	0.0219249	0.0897553	no	31.9723	1	+	50513686	50669458	50513686	ELAVL4	NM_001144774 // ELAVL4 // ELAV like neuron-specific RNA binding protein 4 // 1p34 // 1996 /// NM_001144775 // ELAVL4 // ELAV like neuron-specific RNA binding protein 4 // 1p34 // 1996 /// NM_001144776 // ELAVL4 // ELAV like neuron-specific RNA binding protein 4 // 1p34 // 1996 /// NM_001144777 // ELAVL4 // ELAV like neuron-specific RNA binding protein 4 // 1p34 // 1996 /// NM_021952 // ELAVL4 // …	NM_001144774 // RefSeq // Homo sapiens ELAV like neuron-specific RNA binding protein 4 (ELAVL4), transcript variant 2, mRNA. // chr1 // 100 // 100 // 0 // --- // 0 /// NM_001144775 // RefSeq // Homo sapiens ELAV like neuron-specific RNA binding protein 4 (ELAVL4), transcript variant 3, mRNA. // chr1 // 100 // 100 // 0 // --- // 0 /// NM_001144776 // RefSeq // Homo sapiens ELAV like neuron-specifi…
11	TC07003005.hg.1	-0.00551057	0.0176241	0.766398	no	-0.037291	0.0507068	0.0905067	no	576.718	7	-	68652820	68654305	68654305		---	TCONS_00013190 // NONCODE // accn=NULL class=lncRNA name=Human lincRNA ref=BodyMapLinc transcriptId=TCONS_00013190 cpcScore=-1.4057300 cnci=-0.2850262 // chr7 // 100 // 100 // 0 // --- // 0
17	TC15002624.hg.1	0.00858893	0.0478325	0.629248	no	0.0363296	0.014659	0.091993	no	322.982	15	-	74631628	74636162	74636162	CYP11A1	AY603498 // CYP11A1 // cytochrome P450, family 11, subfamily A, polypeptide 1 // 15q23-q24 // 1583	AY603498 // NONCODE // accn=AY603498 class=mRNAlike lncRNA name=NULL ref=H-invitational v7.5 transcriptId=HIT000255715 cpcScore=1.2323700 cnci=-0.0934931 // chr15 // 100 // 100 // 0 // --- // 0
16	TC15001179.hg.1	0.0406241	0.0188569	0.245161	no	0.0721054	0.0115213	0.0920598	no	77.4944	15	-	32894931	32894959	32894959		---	DQ572979 // NONCODE // accn=DQ572979 class=piRNA name=piR-41091 ref=NONCODE v2.0 transcriptId=NULL cpcScore=-1.3906300 cnci=-1.0000000 // chr15 // 100 // 100 // 0 // --- // 0 /// DQ572979 // GenBank // Homo sapiens piRNA piR-41091, complete sequence. // chr15 // 100 // 100 // 0 // --- // 0 /// uc001zgv.2 // UCSC Genes // Homo sapiens piRNA piR-41091, complete sequence. // chr15 // 100 // 100 // 0…
13	TC08000220.hg.1	0.00965544	0.0193755	0.443085	no	0.0254688	0.00846061	0.0927115	no	163.776	8	+	28351722	28431785	28351722	FZD3	NM_017412 // FZD3 // frizzled class receptor 3 // 8p21 // 7976 /// NM_145866 // FZD3 // frizzled class receptor 3 // 8p21 // 7976 /// ENST00000240093 // FZD3 // frizzled class receptor 3 // 8p21 // 7976 /// ENST00000517911 // FZD3 // frizzled class receptor 3 // 8p21 // 7976 /// ENST00000537916 // FZD3 // frizzled class receptor 3 // 8p21 // 7976 /// OTTHUMT00000219986 // FZD3 // frizzled class r…	NM_017412 // RefSeq // Homo sapiens frizzled class receptor 3 (FZD3), transcript variant 1, mRNA. // chr8 // 100 // 100 // 0 // --- // 0 /// NM_145866 // RefSeq // Homo sapiens frizzled class receptor 3 (FZD3), transcript variant 2, mRNA. // chr8 // 100 // 100 // 0 // --- // 0 /// ENST00000240093 // ENSEMBL // frizzled class receptor 3 [gene_biotype:protein_coding transcript_biotype:protein_codin…
8	TC06000381.hg.1	0.0157665	0.0120166	0.11867	no	0.0203245	0.0163253	0.0949971	no	28.9094	6	+	31674640	31685695	31674640	LY6G6F;LY6G6D	NM_001003693 // LY6G6F // lymphocyte antigen 6 complex, locus G6F // 6p21.33 // 259215 /// NM_021246 // LY6G6D // lymphocyte antigen 6 complex, locus G6D // 6p21.3 // 58530 /// ENST00000375825 // LY6G6D // lymphocyte antigen 6 complex, locus G6D // 6p21.3 // 58530 /// ENST00000375832 // LY6G6F // lymphocyte antigen 6 complex, locus G6F // 6p21.33 // 259215 /// AJ315536 // LY6G6D // lymphocyte ant…	NM_001003693 // RefSeq // Homo sapiens lymphocyte antigen 6 complex, locus G6F (LY6G6F), mRNA. // chr6 // 100 // 100 // 0 // --- // 0 /// NM_021246 // RefSeq // Homo sapiens lymphocyte antigen 6 complex, locus G6D (LY6G6D), mRNA. // chr6 // 100 // 100 // 0 // --- // 0 /// ENST00000375825 // ENSEMBL // lymphocyte antigen 6 complex, locus G6D [gene_biotype:protein_coding transcript_biotype:protein_…
6	TC05002800.hg.1	-0.0461587	0.0176269	0.0595721	no	-0.0492391	0.0379295	0.0954659	no	6.67348	5	-	654144	654462	654462		---	TCONS_00010868 // NONCODE // accn=NULL class=lncRNA name=Human lincRNA ref=BodyMapLinc transcriptId=TCONS_00010868 cpcScore=-1.5187800 cnci=-1.0000000 // chr5 // 100 // 100 // 0 // --- // 0
14	TC09001702.hg.1	-0.0202014	0.0502031	0.124872	no	-0.0262729	0.0348372	0.0981707	no	30.0548	9	-	137541273	137544656	137544656		---	ENST00000371813 // ENSEMBL // COL5A1 antisense RNA 1 [gene_biotype:antisense transcript_biotype:antisense] // chr9 // 100 // 100 // 0 // --- // 0 /// OTTHUMT00000054953 // Havana transcript // COL5A1 antisense RNA 1[gene_biotype:antisense transcript_biotype:antisense] // chr9 // 100 // 100 // 0 // --- // 0
6	TC05002175.hg.1	-0.0393097	0.0185467	0.0533705	no	-0.0408915	0.0324102	0.0982917	no	4.02392	5	+	667579	668841	667579	LOC100132605	BC061593 // LOC100132605 // uncharacterized LOC100132605 // 5p15.33 // 100132605	BC061593 // NONCODE // accn=BC061593 class=mRNAlike lncRNA name=Human lncRNA ref=JounralRNA transcriptId=2761 cpcScore=1.1115900 cnci=-0.0927175 // chr5 // 100 // 100 // 0 // --- // 0
2	TC01004456.hg.1	0.0236851	0.020977	0.118046	no	0.0304481	0.0156027	0.0983864	no	28.554	1	+	67987996	67998015	67987996		---	TCONS_00000219 // NONCODE // accn=NULL class=lncRNA name=Human lincRNA ref=BodyMapLinc transcriptId=TCONS_00000219 cpcScore=0.2054020 cnci=-0.2083769 // chr1 // 100 // 100 // 0 // --- // 0 /// TCONS_00000971 // NONCODE // accn=NULL class=lncRNA name=Human lincRNA ref=BodyMapLinc transcriptId=TCONS_00000971 cpcScore=-0.4835730 cnci=-0.1790876 // chr1 // 100 // 100 // 0 // --- // 0 /// TCONS_000020…
8	TC06001558.hg.1	0.0190167	0.0185702	0.224757	no	0.0312243	0.0137137	0.101358	no	64.1941	6	-	32046285	32046405	32046405		---	ENST00000516703 // ENSEMBL // RNA, 5S ribosomal pseudogene 206 [gene_biotype:rRNA transcript_biotype:rRNA] // chr6 // 100 // 100 // 0 // --- // 0
12	TC07001989.hg.1	0.0198926	0.0134672	0.213433	no	0.0316528	0.0105949	0.102523	no	59.1188	7	-	146778026	146794701	146794701	LOC101928700	ENST00000434887 // LOC101928700 // uncharacterized LOC101928700 // --- // 101928700	ENST00000434887 // ENSEMBL // havana:known chromosome:GRCh38:7:147080934:147097609:-1 gene:ENSG00000236795 gene_biotype:antisense transcript_biotype:antisense // chr7 // 100 // 100 // 0 // --- // 0 /// OTTHUMT00000327671 // Havana transcript // novel transcript[gene_biotype:antisense transcript_biotype:antisense] // chr7 // 100 // 100 // 0 // --- // 0
6	TC05000004.hg.1	-0.015651	0.0138755	0.0690871	no	-0.0161416	0.0133226	0.111386	no	3.1347	5	+	218356	256815	218356	SDHA	NM_004168 // SDHA // succinate dehydrogenase complex subunit A, flavoprotein (Fp) // 5p15 // 6389 /// ENST00000264932 // SDHA // succinate dehydrogenase complex subunit A, flavoprotein (Fp) // 5p15 // 6389 /// ENST00000504309 // SDHA // succinate dehydrogenase complex subunit A, flavoprotein (Fp) // 5p15 // 6389 /// ENST00000507522 // SDHA // succinate dehydrogenase complex subunit A, flavoprotei…	NM_004168 // RefSeq // Homo sapiens succinate dehydrogenase complex, subunit A, flavoprotein (Fp) (SDHA), transcript variant 1, mRNA. // chr5 // 100 // 100 // 0 // --- // 0 /// ENST00000264932 // ENSEMBL // succinate dehydrogenase complex, subunit A, flavoprotein (Fp) [gene_biotype:protein_coding transcript_biotype:protein_coding] // chr5 // 100 // 100 // 0 // --- // 0 /// ENST00000504309 // ENSE…
12	TC07001986.hg.1	-0.00551696	0.0232197	0.721764	no	-0.0296026	0.0325351	0.111778	no	436.574	7	-	146113350	146113645	146113645		---	uc022aom.1 // UCSC Genes // Rfam model RF00017 hit found at contig region AC006315.2/90444-90149 // chr7 // 100 // 100 // 0 // --- // 0
6	TC05002792.hg.1	-0.0345924	0.0246996	0.0653136	no	-0.0361769	0.0168971	0.112008	no	4.58026	5	-	26322	37720	37720		---	TCONS_00010226 // NONCODE // accn=NULL class=lncRNA name=Human lincRNA ref=BodyMapLinc transcriptId=TCONS_00010226 cpcScore=-1.1504500 cnci=-0.2064339 // chr5 // 100 // 100 // 0 // --- // 0
18	TC21000422.hg.1	0.0146417	0.0354045	0.261386	no	0.0247578	0.00687245	0.115452	no	69.0911	21	-	36096105	36109478	36109478	LINC00160	ENST00000430635 // LINC00160 // long intergenic non-protein coding RNA 160 // 21q22.12 // 54064	ENST00000430635 // ENSEMBL // long intergenic non-protein coding RNA 160 [gene_biotype:lincRNA transcript_biotype:lincRNA] // chr21 // 100 // 100 // 0 // --- // 0 /// OTTHUMT00000194141 // NONCODE // non-protein coding RNA 160[gene_biotype:lincRNA transcript_biotype:lincRNA] // chr21 // 100 // 100 // 0 // --- // 0
8	TC06002721.hg.1	0.012694	0.00438953	0.168688	no	0.0171446	0.0222942	0.11624	no	35.0599	6	+	31973413	31976686	31973413	CYP21A1P	NR_040090 // CYP21A1P // cytochrome P450, family 21, subfamily A, polypeptide 1 pseudogene // 6p21.3 // 1590	NR_040090 // NONCODE // accn=NR_040090 class=lncRNA name= ref=RefGeneNoncode transcriptId=NR_040090 cpcScore=5.7138800 cnci=-0.0955157 // chr6 // 100 // 100 // 0 // --- // 0
8	TC06000377.hg.1	-0.00367262	0.0103508	0.708815	no	0.0185071	0.0195648	0.118498	no	603.922	6	+	31620187	31625987	31620187	APOM	NM_001256169 // APOM // apolipoprotein M // 6p21.33 // 55937 /// NM_019101 // APOM // apolipoprotein M // 6p21.33 // 55937 /// NR_045828 // APOM // apolipoprotein M // 6p21.33 // 55937 /// ENST00000375916 // APOM // apolipoprotein M // 6p21.33 // 55937 /// ENST00000375918 // APOM // apolipoprotein M // 6p21.33 // 55937 /// ENST00000375920 // APOM // apolipoprotein M // 6p21.33 // 55937 /// AF1614…	NM_001256169 // RefSeq // Homo sapiens apolipoprotein M (APOM), transcript variant 2, mRNA. // chr6 // 100 // 100 // 0 // --- // 0 /// NM_019101 // RefSeq // Homo sapiens apolipoprotein M (APOM), transcript variant 1, mRNA. // chr6 // 100 // 100 // 0 // --- // 0 /// NR_045828 // RefSeq // Homo sapiens apolipoprotein M (APOM), transcript variant 3, non-coding RNA. // chr6 // 100 // 100 // 0 // ---…
9	TC07002766.hg.1	0.00707091	0.0198729	0.652673	no	0.0295163	0.0269535	0.121001	no	317.433	7	-	4645446	4646569	4646569		---	TCONS_00013683 // NONCODE // accn=NULL class=lncRNA name=Human lincRNA ref=BodyMapLinc transcriptId=TCONS_00013683 cpcScore=-1.1525400 cnci=-0.0924842 // chr7 // 100 // 100 // 0 // --- // 0
8	TC06000396.hg.1	0.0258378	0.0161414	0.174795	no	0.0353617	0.0204154	0.121144	no	36.8605	6	+	32223488	32233615	32223488		---	ENST00000425033 // ENSEMBL // havana:known chromosome:GRCh38:6:32255711:32265838:1 gene:ENSG00000225914 gene_biotype:antisense transcript_biotype:antisense // chr6 // 100 // 100 // 0 // --- // 0 /// AK123889 // GenBank // Homo sapiens cDNA FLJ41895 fis, clone OCBBF2025458. // chr6 // 100 // 100 // 0 // --- // 0 /// OTTHUMT00000316882 // Havana transcript // putative novel transcript[gene_biotype:…
14	TC09000791.hg.1	-0.0286043	0.0148701	0.0787777	no	-0.0301261	0.012412	0.124263	no	5.32042	9	+	138073455	138079152	138073455	LOC401557	NR_046107 // LOC401557 // uncharacterized LOC401557 // 9q34.3 // 401557	NR_046107 // RefSeq // Homo sapiens uncharacterized LOC401557 (LOC401557), long non-coding RNA. // chr9 // 100 // 100 // 0 // --- // 0
16	TC15000222.hg.1	-0.0481132	0.010799	0.0422215	no	-0.0443493	0.0479348	0.12431	no	-7.82297	15	+	32885657	32896179	32885657	GOLGA8N	ENST00000448387 // GOLGA8N // golgin A8 family, member N // 15q13.2 // 643699 /// AK310041 // GOLGA8N // golgin A8 family, member N // 15q13.2 // 643699 /// BC101292 // GOLGA8N // golgin A8 family, member N // 15q13.2 // 643699	ENST00000448387 // ENSEMBL // golgin A8 family, member N [gene_biotype:protein_coding transcript_biotype:protein_coding] // chr15 // 100 // 100 // 0 // --- // 0 /// AK310041 // GenBank HTC // Homo sapiens cDNA, FLJ17083. // chr15 // 100 // 100 // 0 // --- // 0 /// BC101292 // GenBank // Homo sapiens similar to golgi autoantigen, golgin subfamily a, 8E, mRNA (cDNA clone IMAGE:40024529), partial cd…
2	TC01002763.hg.1	0.0217832	0.0181031	0.676216	no	0.0965774	0.0479348	0.124348	no	343.356	1	-	68564142	68698420	68698420	WLS	NM_001002292 // WLS // wntless Wnt ligand secretion mediator // 1p31.3 // 79971 /// NM_001193334 // WLS // wntless Wnt ligand secretion mediator // 1p31.3 // 79971 /// NM_024911 // WLS // wntless Wnt ligand secretion mediator // 1p31.3 // 79971 /// ENST00000262348 // WLS // wntless Wnt ligand secretion mediator // 1p31.3 // 79971 /// ENST00000354777 // WLS // wntless Wnt ligand secretion mediator…	NM_001002292 // RefSeq // Homo sapiens wntless Wnt ligand secretion mediator (WLS), transcript variant 2, mRNA. // chr1 // 100 // 100 // 0 // --- // 0 /// NM_001193334 // RefSeq // Homo sapiens wntless Wnt ligand secretion mediator (WLS), transcript variant 3, mRNA. // chr1 // 100 // 100 // 0 // --- // 0 /// NM_024911 // RefSeq // Homo sapiens wntless Wnt ligand secretion mediator (WLS), transcri…
13	TC08001854.hg.1	0.0127741	0.0203231	0.269451	no	0.021307	0.0455414	0.125921	no	66.7989	8	+	28480295	28556150	28480295		---	linc_luo_527 // NONCODE // accn=NULL class=lincRNA name=Human lincRNA ref=Scripture Reconstruction LincRNAs By Luo transcriptId=linc_luo_527 cpcScore=-1.4091800 cnci=-0.4207011 // chr8 // 100 // 100 // 0 // --- // 0
17	TC15001651.hg.1	-0.00467316	0.0208815	0.617074	no	-0.0170701	0.014533	0.126802	no	265.28	15	-	75192328	75199462	75199462	FAM219B	NM_020447 // FAM219B // family with sequence similarity 219, member B // 15q24.1 // 57184 /// ENST00000357635 // FAM219B // family with sequence similarity 219, member B // 15q24.1 // 57184 /// AK308954 // FAM219B // family with sequence similarity 219, member B // 15q24.1 // 57184 /// BC006348 // FAM219B // family with sequence similarity 219, member B // 15q24.1 // 57184 /// BC015637 // FAM219B…	NM_020447 // RefSeq // Homo sapiens family with sequence similarity 219, member B (FAM219B), mRNA. // chr15 // 100 // 100 // 0 // --- // 0 /// ENST00000357635 // ENSEMBL // family with sequence similarity 219, member B [gene_biotype:protein_coding transcript_biotype:protein_coding] // chr15 // 100 // 100 // 0 // --- // 0 /// AK308954 // GenBank HTC // Homo sapiens cDNA, FLJ98995. // chr15 // 100 …
8	TC06001564.hg.1	-0.00665943	0.0210277	0.129871	no	-0.00808928	0.0177845	0.12846	no	21.4711	6	-	32162620	32191844	32191844	NOTCH4	NM_004557 // NOTCH4 // notch 4 // 6p21.3 // 4855 /// ENST00000375023 // NOTCH4 // notch 4 // 6p21.3 // 4855 /// ENST00000465528 // NOTCH4 // notch 4 // 6p21.3 // 4855 /// AK131314 // NOTCH4 // notch 4 // 6p21.3 // 4855 /// AK290785 // NOTCH4 // notch 4 // 6p21.3 // 4855 /// AK293692 // NOTCH4 // notch 4 // 6p21.3 // 4855 /// AK294161 // NOTCH4 // notch 4 // 6p21.3 // 4855 /// BC140782 // NOTCH4 /…	NM_004557 // RefSeq // Homo sapiens notch 4 (NOTCH4), mRNA. // chr6 // 100 // 100 // 0 // --- // 0 /// ENST00000375023 // ENSEMBL // notch 4 [gene_biotype:protein_coding transcript_biotype:protein_coding] // chr6 // 100 // 100 // 0 // --- // 0 /// ENST00000465528 // ENSEMBL // notch 4 [gene_biotype:protein_coding transcript_biotype:processed_transcript] // chr6 // 100 // 100 // 0 // --- // 0 /// …
2	TC01004457.hg.1	0.00710647	0.0243449	0.311864	no	0.0127527	0.00866425	0.1289	no	79.4524	1	+	68297986	68668670	68297986	GNG12-AS1	ENST00000413628 // GNG12-AS1 // GNG12 antisense RNA 1 // 1p31.3 // 100289178 /// ENST00000414904 // GNG12-AS1 // GNG12 antisense RNA 1 // 1p31.3 // 100289178 /// ENST00000420587 // GNG12-AS1 // GNG12 antisense RNA 1 // 1p31.3 // 100289178 /// ENST00000434072 // GNG12-AS1 // GNG12 antisense RNA 1 // 1p31.3 // 100289178	ENST00000413628 // NONCODE // GNG12 antisense RNA 1 [gene_biotype:antisense transcript_biotype:antisense] // chr1 // 100 // 100 // 0 // --- // 0 /// ENST00000414904 // NONCODE // GNG12 antisense RNA 1 [gene_biotype:antisense transcript_biotype:antisense] // chr1 // 100 // 100 // 0 // --- // 0 /// ENST00000420587 // NONCODE // GNG12 antisense RNA 1 [gene_biotype:antisense transcript_biotype:antise…
14	TC09000792.hg.1	0.00626116	0.0238078	0.629858	no	0.0235498	0.0270364	0.130452	no	276.125	9	+	138235095	138238408	138235095	C9orf62	BC034752 // C9orf62 // chromosome 9 open reading frame 62 // 9q34.3 // 157927 /// OTTHUMT00000054980 // C9orf62 // chromosome 9 open reading frame 62 // 9q34.3 // 157927 /// uc004cfo.3 // C9orf62 // chromosome 9 open reading frame 62 // 9q34.3 // 157927	BC034752 // GenBank // Homo sapiens chromosome 9 open reading frame 62, mRNA (cDNA clone MGC:35463 IMAGE:5193354), complete cds. // chr9 // 100 // 100 // 0 // --- // 0 /// OTTHUMT00000054980 // Havana transcript // chromosome 9 open reading frame 62[gene_biotype:lincRNA transcript_biotype:lincRNA] // chr9 // 100 // 100 // 0 // --- // 0 /// uc004cfo.3 // UCSC Genes // Homo sapiens chromosome 9 ope…
6	TC05002176.hg.1	-0.00840609	0.0107167	0.259345	no	-0.0135481	0.0105016	0.135655	no	61.1698	5	+	693675	785956	693675		---	linc_luo_2010 // NONCODE // accn=NULL class=lincRNA name=Human lincRNA ref=Scripture Reconstruction LincRNAs By Luo transcriptId=linc_luo_2010 cpcScore=-1.4115000 cnci=-1.0000000 // chr5 // 100 // 100 // 0 // --- // 0 /// TCONS_l2_00022134-XLOC_l2_011432 // Broad TUCP // linc-TPPP-BP chr5:+:693674-785669 // chr5 // 100 // 100 // 0 // --- // 0
16	TC15001185.hg.1	0.00581406	0.0201122	0.517977	no	0.0162756	0.00858904	0.13811	no	179.936	15	-	33527753	33539756	33539756	TMCO5B	NR_046005 // TMCO5B // transmembrane and coiled-coil domains 5B, pseudogene // 15q13.3 // 100652857	NR_046005 // RefSeq // Homo sapiens transmembrane and coiled-coil domains 5B, pseudogene (TMCO5B), non-coding RNA. // chr15 // 100 // 100 // 0 // --- // 0 /// ENST00000529696 // ENSEMBL // transmembrane and coiled-coil domains 5B, pseudogene [gene_biotype:unitary_pseudogene transcript_biotype:processed_transcript] // chr15 // 100 // 100 // 0 // --- // 0
18	TC21000417.hg.1	0.0220008	0.0160639	0.150656	no	0.0269654	0.0269049	0.142716	no	22.5654	21	-	35791013	35796264	35796264	KCNE1	ENST00000450895 // KCNE1 // potassium channel, voltage gated subfamily E regulatory beta subunit 1 // 21q22.12 // 3753	ENST00000450895 // ENSEMBL // havana:known chromosome:GRCh38:21:34418715:34423966:-1 gene:ENSG00000243627 gene_biotype:protein_coding transcript_biotype:protein_coding // chr21 // 100 // 100 // 0 // --- // 0 /// BC049386 // GenBank // Homo sapiens, clone IMAGE:5759495, mRNA. // chr21 // 100 // 100 // 0 // --- // 0 /// OTTHUMT00000368900 // Havana transcript // novel protein[gene_biotype:protein_c…
10	TC07002285.hg.1	0.0151568	0.0337211	0.282739	no	0.0248969	0.0100344	0.144633	no	64.2623	7	+	44924552	44925992	44924552		---	BC047792 // NONCODE // accn=BC047792 class=mRNAlike lncRNA name=Human lncRNA ref=JounralRNA transcriptId=3707 cpcScore=-1.0652100 cnci=-0.1731854 // chr7 // 100 // 100 // 0 // --- // 0
15	TC10000109.hg.1	-0.0237132	0.0139275	0.145339	no	-0.0285795	0.014431	0.14596	no	20.5214	10	+	14116283	14129604	14116283		---	ENST00000451617 // ENSEMBL // havana:known chromosome:GRCh38:10:14074284:14087605:1 gene:ENSG00000235410 gene_biotype:antisense transcript_biotype:antisense // chr10 // 100 // 100 // 0 // --- // 0 /// OTTHUMT00000046886 // Havana transcript // novel transcript[gene_biotype:antisense transcript_biotype:antisense] // chr10 // 100 // 100 // 0 // --- // 0
13	TC08002266.hg.1	0.00327512	0.0124815	0.614396	no	0.0114213	0.0133663	0.147443	no	248.729	8	-	28536529	28558981	28558981	EXTL3-AS1	BC043205 // EXTL3-AS1 // EXTL3 antisense RNA 1 // 8p21.1 // 101929402 /// ENST00000519870 // EXTL3-AS1 // EXTL3 antisense RNA 1 // 8p21.1 // 101929402 /// ENST00000520023 // EXTL3-AS1 // EXTL3 antisense RNA 1 // 8p21.1 // 101929402 /// ENST00000523789 // EXTL3-AS1 // EXTL3 antisense RNA 1 // 8p21.1 // 101929402	BC043205 // NONCODE // accn=BC043205 class=mRNAlike lncRNA name=Human lncRNA ref=JounralRNA transcriptId=3938 cpcScore=0.0608249 cnci=-0.2375133 // chr8 // 100 // 100 // 0 // --- // 0 /// ENST00000519870 // NONCODE // EXTL3 antisense RNA 1 [gene_biotype:antisense transcript_biotype:antisense] // chr8 // 100 // 100 // 0 // --- // 0 /// ENST00000520023 // NONCODE // EXTL3 antisense RNA 1 [gene_biot…
9	TC07000050.hg.1	-0.00565813	0.0213914	0.260871	no	-0.0089091	0.0255069	0.147705	no	57.4567	7	+	5314000	5343704	5314000	SLC29A4	NM_001040661 // SLC29A4 // solute carrier family 29 (equilibrative nucleoside transporter), member 4 // 7p22.1 // 222962 /// NM_153247 // SLC29A4 // solute carrier family 29 (equilibrative nucleoside transporter), member 4 // 7p22.1 // 222962 /// ENST00000297195 // SLC29A4 // solute carrier family 29 (equilibrative nucleoside transporter), member 4 // 7p22.1 // 222962 /// ENST00000396872 // SLC29…	NM_001040661 // RefSeq // Homo sapiens solute carrier family 29 (equilibrative nucleoside transporter), member 4 (SLC29A4), transcript variant 1, mRNA. // chr7 // 100 // 100 // 0 // --- // 0 /// NM_153247 // RefSeq // Homo sapiens solute carrier family 29 (equilibrative nucleoside transporter), member 4 (SLC29A4), transcript variant 2, mRNA. // chr7 // 100 // 100 // 0 // --- // 0 /// ENST00000297…
16	TC15000223.hg.1	-0.0127768	0.0188663	0.487737	no	-0.031696	0.00978961	0.150219	no	148.074	15	+	32907345	32932150	32907345	ARHGAP11A	NM_014783 // ARHGAP11A // Rho GTPase activating protein 11A // 15q13.2 // 9824 /// NM_199357 // ARHGAP11A // Rho GTPase activating protein 11A // 15q13.2 // 9824 /// ENST00000361627 // ARHGAP11A // Rho GTPase activating protein 11A // 15q13.2 // 9824 /// ENST00000543522 // ARHGAP11A // Rho GTPase activating protein 11A // 15q13.2 // 9824 /// AK303025 // ARHGAP11A // Rho GTPase activating protein …	NM_014783 // RefSeq // Homo sapiens Rho GTPase activating protein 11A (ARHGAP11A), transcript variant 1, mRNA. // chr15 // 100 // 100 // 0 // --- // 0 /// NM_199357 // RefSeq // Homo sapiens Rho GTPase activating protein 11A (ARHGAP11A), transcript variant 2, mRNA. // chr15 // 100 // 100 // 0 // --- // 0 /// ENST00000361627 // ENSEMBL // Rho GTPase activating protein 11A [gene_biotype:protein_cod…
14	TC09002336.hg.1	-0.0124429	0.027099	0.366791	no	-0.0235721	0.0179414	0.154267	no	89.442	9	+	137519676	137521252	137519676		---	TCONS_00015772 // NONCODE // accn=NULL class=lncRNA name=Human lincRNA ref=BodyMapLinc transcriptId=TCONS_00015772 cpcScore=-1.0287300 cnci=-0.0900989 // chr9 // 100 // 100 // 0 // --- // 0
9	TC07001115.hg.1	0.0233219	0.0218954	0.184834	no	0.0299011	0.0323553	0.156167	no	28.2103	7	-	5160941	5184177	5184177	ZNF890P	NR_034163 // ZNF890P // zinc finger protein 890, pseudogene // 7p22.1 // 645700 /// BC127664 // ZNF890P // zinc finger protein 890, pseudogene // 7p22.1 // 645700 /// NR_034163 // ZNF890P // zinc finger protein 890, pseudogene // 7p22.1 // 645700 /// uc003snu.1 // ZNF890P // zinc finger protein 890, pseudogene // 7p22.1 // 645700 /// uc011jwf.1 // ZNF890P // zinc finger protein 890, pseudogene //…	NR_034163 // RefSeq // Homo sapiens zinc finger protein 890, pseudogene (ZNF890P), non-coding RNA. // chr7 // 100 // 100 // 0 // --- // 0 /// BC127664 // GenBank HTC // Homo sapiens cDNA clone IMAGE:40128042, with apparent retained intron. // chr7 // 100 // 100 // 0 // --- // 0 /// NR_034163 // NONCODE // accn=NR_034163 class=lncRNA name= ref=RefGeneNoncode transcriptId=NR_034163 cpcScore=2.20093…
10	TC07002289.hg.1	-0.00172012	0.00452011	0.901907	no	-0.0237966	0.0147562	0.15942	no	1283.43	7	+	45228588	45232084	45228588		---	TCONS_00014121 // NONCODE // accn=NULL class=lncRNA name=Human lincRNA ref=BodyMapLinc transcriptId=TCONS_00014121 cpcScore=-0.7289760 cnci=-0.2480185 // chr7 // 100 // 100 // 0 // --- // 0
16	TC15001178.hg.1	0.017883	0.0184253	0.332629	no	0.0311593	0.0175165	0.160578	no	74.2399	15	-	32892833	32892866	32892866		---	DQ595055 // NONCODE // accn=DQ595055 class=piRNA name=piR-61167 ref=NONCODE v2.0 transcriptId=NULL cpcScore=-1.3180000 cnci=-1.0000000 // chr15 // 100 // 100 // 0 // --- // 0 /// DQ595055 // GenBank // Homo sapiens piRNA piR-61167, complete sequence. // chr15 // 100 // 100 // 0 // --- // 0 /// uc001zgu.2 // NONCODE // accn=NULL class=lncRNA name= ref=UCSCGeneNoncode transcriptId=uc001zgu.2 cpcSco…
11	TC07002393.hg.1	0.0129859	0.015753	0.475075	no	0.0310388	0.0127104	0.161395	no	139.018	7	+	68505139	68511790	68505139		---	TCONS_00013020 // NONCODE // accn=NULL class=lncRNA name=Human lincRNA ref=BodyMapLinc transcriptId=TCONS_00013020 cpcScore=-1.3025300 cnci=-0.3117104 // chr7 // 100 // 100 // 0 // --- // 0
14	TC09002345.hg.1	-0.0133507	0.00458234	0.335012	no	-0.0234105	0.0121934	0.161427	no	75.3504	9	+	138359934	138364095	138359934		---	TCONS_00015775 // NONCODE // accn=NULL class=lncRNA name=Human lincRNA ref=BodyMapLinc transcriptId=TCONS_00015775 cpcScore=-0.7050650 cnci=-0.2260784 // chr9 // 100 // 100 // 0 // --- // 0
8	TC06001559.hg.1	0.0307	0.016115	0.0940867	no	0.0308822	0.0125413	0.161464	no	0.593732	6	-	32096484	32098068	32098068	FKBPL	NM_022110 // FKBPL // FK506 binding protein like // 6p21.3 // 63943 /// ENST00000375156 // FKBPL // FK506 binding protein like // 6p21.3 // 63943 /// BC004168 // FKBPL // FK506 binding protein like // 6p21.3 // 63943 /// BC011966 // FKBPL // FK506 binding protein like // 6p21.3 // 63943 /// OTTHUMT00000076221 // FKBPL // FK506 binding protein like // 6p21.3 // 63943 /// uc003nzr.3 // FKBPL // FK5…	NM_022110 // RefSeq // Homo sapiens FK506 binding protein like (FKBPL), mRNA. // chr6 // 100 // 100 // 0 // --- // 0 /// ENST00000375156 // ENSEMBL // FK506 binding protein like [gene_biotype:protein_coding transcript_biotype:protein_coding] // chr6 // 100 // 100 // 0 // --- // 0 /// BC004168 // GenBank // Homo sapiens FK506 binding protein like, mRNA (cDNA clone MGC:2703 IMAGE:2820874), complete…
2	TC01000745.hg.1	-0.0174011	0.00893618	0.161378	no	-0.0206941	0.0219735	0.166107	no	18.9241	1	+	68150744	68154021	68150744	GADD45A	NM_001199741 // GADD45A // growth arrest and DNA-damage-inducible, alpha // 1p31.2 // 1647 /// NM_001199742 // GADD45A // growth arrest and DNA-damage-inducible, alpha // 1p31.2 // 1647 /// NM_001924 // GADD45A // growth arrest and DNA-damage-inducible, alpha // 1p31.2 // 1647 /// ENST00000370985 // GADD45A // growth arrest and DNA-damage-inducible, alpha // 1p31.2 // 1647 /// ENST00000370986 // …	NM_001199741 // RefSeq // Homo sapiens growth arrest and DNA-damage-inducible, alpha (GADD45A), transcript variant 2, mRNA. // chr1 // 100 // 100 // 0 // --- // 0 /// NM_001199742 // RefSeq // Homo sapiens growth arrest and DNA-damage-inducible, alpha (GADD45A), transcript variant 3, mRNA. // chr1 // 100 // 100 // 0 // --- // 0 /// NM_001924 // RefSeq // Homo sapiens growth arrest and DNA-damage-…
8	TC06001553.hg.1	0.00863431	0.0126017	0.15503	no	0.0100068	0.00980493	0.166628	no	15.8956	6	-	31937587	31940221	31940221	DXO	NM_005510 // DXO // decapping exoribonuclease // 6p21.3 // 1797 /// ENST00000337523 // DXO // decapping exoribonuclease // 6p21.3 // 1797 /// ENST00000375349 // DXO // decapping exoribonuclease // 6p21.3 // 1797 /// ENST00000375356 // DXO // decapping exoribonuclease // 6p21.3 // 1797 /// ENST00000478221 // DXO // decapping exoribonuclease // 6p21.3 // 1797 /// AF059253 // DXO // decapping exorib…	NM_005510 // RefSeq // Homo sapiens decapping exoribonuclease (DXO), mRNA. // chr6 // 100 // 100 // 0 // --- // 0 /// ENST00000337523 // ENSEMBL // decapping exoribonuclease [gene_biotype:protein_coding transcript_biotype:protein_coding] // chr6 // 100 // 100 // 0 // --- // 0 /// ENST00000375349 // ENSEMBL // decapping exoribonuclease [gene_biotype:protein_coding transcript_biotype:protein_coding…
18	TC21000942.hg.1	0.00961351	0.0287742	0.589963	no	0.0301364	0.0478333	0.16729	no	213.48	21	-	36089937	36090503	36090503	CLIC6	AF308293 // CLIC6 // chloride intracellular channel 6 // 21q22.12 // 54102	AF308293 // NONCODE // accn=AF308293 class=mRNAlike lncRNA name=Human lncRNA ref=JounralRNA transcriptId=1915 cpcScore=-1.1501200 cnci=-0.3491157 // chr21 // 100 // 100 // 0 // --- // 0
16	TC15002131.hg.1	-0.0262402	0.0105471	0.289984	no	-0.0412794	0.0228904	0.170758	no	57.3133	15	+	32892388	32893206	32892388		---	TCONS_l2_00009427-XLOC_l2_004612 // Broad TUCP // linc-ARHGAP11A-1 chr15:+:32892387-32893206 // chr15 // 100 // 100 // 0 // --- // 0
4	TC02002161.hg.1	0.0113308	0.0102785	0.246057	no	0.016143	0.0120045	0.17214	no	42.4703	2	-	105363095	105374177	105374177	LINC01114	NR_038231 // LINC01114 // long intergenic non-protein coding RNA 1114 // 2q12.1 // 284998 /// ENST00000421071 // LINC01114 // long intergenic non-protein coding RNA 1114 // 2q12.1 // 284998 /// ENST00000424321 // LINC01114 // long intergenic non-protein coding RNA 1114 // 2q12.1 // 284998 /// ENST00000425879 // LINC01114 // long intergenic non-protein coding RNA 1114 // 2q12.1 // 284998	NR_038231 // RefSeq // Homo sapiens long intergenic non-protein coding RNA 1114 (LINC01114), long non-coding RNA. // chr2 // 100 // 100 // 0 // --- // 0 /// ENST00000421071 // ENSEMBL // long intergenic non-protein coding RNA 1114 [gene_biotype:lincRNA transcript_biotype:lincRNA] // chr2 // 100 // 100 // 0 // --- // 0 /// ENST00000424321 // ENSEMBL // long intergenic non-protein coding RNA 1114 […
17	TC15002283.hg.1	0.014803	0.0215783	0.521438	no	0.0377037	0.0368402	0.176697	no	154.703	15	+	74800497	74806312	74800497		---	TCONS_00023466 // NONCODE // accn=NULL class=lncRNA name=Human lincRNA ref=BodyMapLinc transcriptId=TCONS_00023466 cpcScore=-0.1097370 cnci=-0.2265434 // chr15 // 100 // 100 // 0 // --- // 0
14	TC09000786.hg.1	-0.01197	0.0239363	0.383106	no	-0.0218423	0.0139231	0.188297	no	82.475	9	+	137519676	137521252	137519676		---	ENST00000454160 // ENSEMBL // cdna:known chromosome:GRCh37:9:137519676:137521252:1 gene:ENSG00000225565 gene_biotype:antisense transcript_biotype:antisense // chr9 // 100 // 100 // 0 // --- // 0 /// OTTHUMT00000054952 // NONCODE // accn=NULL class=mRNAlike lncRNA name=vega lncRNA ref=GENCODE transcriptId=OTTHUMT00000054952 cpcScore=-0.9323970 cnci=-0.0891650 // chr9 // 100 // 100 // 0 // --- // 0…
8	TC06004121.hg.1	0.00237986	0.0106191	0.825407	no	0.0172005	0.0195594	0.191291	no	622.753	6	-	32083041	32096030	32096030	ATF6B	NM_001136153 // ATF6B // activating transcription factor 6 beta // 6p21.3 // 1388 /// NM_004381 // ATF6B // activating transcription factor 6 beta // 6p21.3 // 1388 /// ENST00000375201 // ATF6B // activating transcription factor 6 beta // 6p21.3 // 1388 /// ENST00000375203 // ATF6B // activating transcription factor 6 beta // 6p21.3 // 1388 /// ENST00000468502 // ATF6B // activating transcription…	NM_001136153 // RefSeq // Homo sapiens activating transcription factor 6 beta (ATF6B), transcript variant 2, mRNA. // chr6 // 100 // 100 // 0 // --- // 0 /// NM_004381 // RefSeq // Homo sapiens activating transcription factor 6 beta (ATF6B), transcript variant 1, mRNA. // chr6 // 100 // 100 // 0 // --- // 0 /// ENST00000375201 // ENSEMBL // activating transcription factor 6 beta [gene_biotype:pro…
4	TC02002158.hg.1	0.0178666	0.0113056	0.16429	no	0.0202099	0.0177574	0.196092	no	13.1155	2	-	105104914	105136671	105136671	LINC01103	ENST00000430551 // LINC01103 // long intergenic non-protein coding RNA 1103 // 2q12.1 // 101927360	ENST00000430551 // ENSEMBL // long intergenic non-protein coding RNA 1103 [gene_biotype:lincRNA transcript_biotype:lincRNA] // chr2 // 100 // 100 // 0 // --- // 0 /// OTTHUMT00000329246 // Havana transcript // novel transcript[gene_biotype:lincRNA transcript_biotype:lincRNA] // chr2 // 100 // 100 // 0 // --- // 0
4	TC02004462.hg.1	0.0216723	0.00833748	0.242303	no	0.0290815	0.0126552	0.196583	no	34.187	2	-	105197279	105198348	105198348		---	TCONS_00003351 // NONCODE // accn=NULL class=lncRNA name=Human lincRNA ref=BodyMapLinc transcriptId=TCONS_00003351 cpcScore=-1.1522200 cnci=-0.3612567 // chr2 // 100 // 100 // 0 // --- // 0
8	TC06000384.hg.1	0.0147839	0.0245141	0.61809	no	0.0459416	0.0228011	0.197209	no	210.754	6	+	31783241	31785723	31783241	HSPA1A;HSPA1B	NM_005345 // HSPA1A // heat shock 70kDa protein 1A // 6p21.3 // 3303 /// NM_005346 // HSPA1B // heat shock 70kDa protein 1B // 6p21.3 // 3304 /// ENST00000375651 // HSPA1A // heat shock 70kDa protein 1A // 6p21.3 // 3303 /// ENST00000458062 // HSPA1B // heat shock 70kDa protein 1B // 6p21.3 // 3304 /// AK096017 // HSPA1A // heat shock 70kDa protein 1A // 6p21.3 // 3303 /// AK298098 // HSPA1A // h…	NM_005345 // RefSeq // Homo sapiens heat shock 70kDa protein 1A (HSPA1A), mRNA. // chr6 // 100 // 100 // 0 // --- // 0 /// NM_005346 // RefSeq // Homo sapiens heat shock 70kDa protein 1B (HSPA1B), mRNA. // chr6 // 100 // 100 // 0 // --- // 0 /// ENST00000375651 // ENSEMBL // heat shock 70kDa protein 1A [gene_biotype:protein_coding transcript_biotype:protein_coding] // chr6 // 100 // 100 // 0 // -…
8	TC06004119.hg.1	-0.0205298	0.0134559	0.0774684	no	-0.0176974	0.00715128	0.197794	no	-13.7967	6	-	31698358	31707540	31707540	CLIC1	NM_001288 // CLIC1 // chloride intracellular channel 1 // 6p21.3 // 1192 /// ENST00000375779 // CLIC1 // chloride intracellular channel 1 // 6p21.3 // 1192 /// ENST00000375780 // CLIC1 // chloride intracellular channel 1 // 6p21.3 // 1192 /// ENST00000375784 // CLIC1 // chloride intracellular channel 1 // 6p21.3 // 1192 /// ENST00000395892 // CLIC1 // chloride intracellular channel 1 // 6p21.3 //…	NM_001288 // RefSeq // Homo sapiens chloride intracellular channel 1 (CLIC1), transcript variant 2, mRNA. // chr6 // 100 // 100 // 0 // --- // 0 /// ENST00000375779 // ENSEMBL // chloride intracellular channel 1 [gene_biotype:protein_coding transcript_biotype:protein_coding] // chr6 // 100 // 100 // 0 // --- // 0 /// ENST00000375780 // ENSEMBL // chloride intracellular channel 1 [gene_biotype:pro…
9	TC07001114.hg.1	0.0198677	0.0083806	0.236686	no	0.0260679	0.0301068	0.197958	no	31.2071	7	-	4936899	4938473	4938473		---	BC045805 // GenBank // Homo sapiens cDNA clone IMAGE:4821555. // chr7 // 100 // 100 // 0 // --- // 0 /// uc003snm.1 // UCSC Genes // Homo sapiens cDNA clone IMAGE:4828807. // chr7 // 100 // 100 // 0 // --- // 0
7	TC05000594.hg.1	-0.0236634	0.00997403	0.265294	no	-0.0329184	0.033595	0.198481	no	39.1111	5	+	124255640	124257291	124255640		---	ENST00000509456 // ENSEMBL // havana:known chromosome:GRCh38:5:124919947:124921598:1 gene:ENSG00000249423 gene_biotype:lincRNA transcript_biotype:lincRNA // chr5 // 100 // 100 // 0 // --- // 0 /// OTTHUMT00000371293 // Havana transcript // novel transcript[gene_biotype:lincRNA transcript_biotype:lincRNA] // chr5 // 100 // 100 // 0 // --- // 0
8	TC06001543.hg.1	-0.00370894	0.017824	0.522777	no	-0.00886573	0.00579566	0.202202	no	139.037	6	-	31745295	31763730	31763730	VARS	NM_006295 // VARS // valyl-tRNA synthetase // 6p21.3 // 7407 /// ENST00000375663 // VARS // valyl-tRNA synthetase // 6p21.3 // 7407 /// ENST00000482996 // VARS // valyl-tRNA synthetase // 6p21.3 // 7407 /// AK302762 // VARS // valyl-tRNA synthetase // 6p21.3 // 7407 /// BC012808 // VARS // valyl-tRNA synthetase // 6p21.3 // 7407 /// OTTHUMT00000076619 // VARS // valyl-tRNA synthetase // 6p21.3 //…	NM_006295 // RefSeq // Homo sapiens valyl-tRNA synthetase (VARS), mRNA. // chr6 // 100 // 100 // 0 // --- // 0 /// ENST00000375663 // ENSEMBL // valyl-tRNA synthetase [gene_biotype:protein_coding transcript_biotype:protein_coding] // chr6 // 100 // 100 // 0 // --- // 0 /// ENST00000482996 // ENSEMBL // valyl-tRNA synthetase [gene_biotype:protein_coding transcript_biotype:processed_transcript] // …
12	TC07001992.hg.1	-0.064212	0.0162423	0.023839	no	-0.043544	0.0180394	0.204577	no	-32.1871	7	-	147202469	147202565	147202565		---	uc022aoq.1 // UCSC Genes // Rfam model RF00761 hit found at contig region AC004896.1/116218-116314 // chr7 // 100 // 100 // 0 // --- // 0
7	TC05002598.hg.1	-0.012283	0.0058272	0.459649	no	-0.0252704	0.0183673	0.204882	no	105.735	5	+	123791066	123795791	123791066		---	TCONS_00009500 // NONCODE // accn=NULL class=lncRNA name=Human lincRNA ref=BodyMapLinc transcriptId=TCONS_00009500 cpcScore=-0.9718800 cnci=-0.2239703 // chr5 // 100 // 100 // 0 // --- // 0
16	TC15000225.hg.1	0.0257094	0.0164214	0.19616	no	0.0306136	0.0185501	0.210039	no	19.0754	15	+	32962080	32963900	32962080		---	BC137370 // GenBank // Homo sapiens chromosome 15 open reading frame 45, mRNA (cDNA clone MGC:168991 IMAGE:9021368), complete cds. // chr15 // 100 // 100 // 0 // --- // 0 /// BC137374 // GenBank // Homo sapiens chromosome 15 open reading frame 45, mRNA (cDNA clone MGC:168995 IMAGE:9021372), complete cds. // chr15 // 100 // 100 // 0 // --- // 0 /// uc001zhb.2 // UCSC Genes // Homo sapiens cDNA FLJ…
14	TC09002346.hg.1	-0.0100255	0.0114536	0.290697	no	-0.0142986	0.0153102	0.210689	no	42.6221	9	+	138466771	138478958	138466771		---	TCONS_00015559 // NONCODE // accn=NULL class=lncRNA name=Human lincRNA ref=BodyMapLinc transcriptId=TCONS_00015559 cpcScore=-0.3638050 cnci=-0.1529253 // chr9 // 100 // 100 // 0 // --- // 0 /// TCONS_00015776 // NONCODE // accn=NULL class=lncRNA name=Human lincRNA ref=BodyMapLinc transcriptId=TCONS_00015776 cpcScore=-1.2484500 cnci=-0.1424846 // chr9 // 100 // 100 // 0 // --- // 0 /// uc004cgh.1 …
7	TC05001734.hg.1	0.0023006	0.00643054	0.909869	no	0.0305524	0.015068	0.213719	no	1228.02	5	-	124204665	124205607	124205607		---	ENST00000510242 // ENSEMBL // havana:known chromosome:GRCh38:5:124868972:124869914:-1 gene:ENSG00000249261 gene_biotype:lincRNA transcript_biotype:lincRNA // chr5 // 100 // 100 // 0 // --- // 0 /// OTTHUMT00000371296 // Havana transcript // novel transcript[gene_biotype:lincRNA transcript_biotype:lincRNA] // chr5 // 100 // 100 // 0 // --- // 0
6	TC05002799.hg.1	0.008901	0.0195992	0.437998	no	0.017371	0.016568	0.214332	no	95.1579	5	-	602735	612325	612325		---	TCONS_l2_00022718-XLOC_l2_011899 // Broad TUCP // linc-SLC9A3-2 chr5:-:611640-612292 // chr5 // 100 // 100 // 0 // --- // 0 /// TCONS_l2_00023626-XLOC_l2_011899 // Broad TUCP // linc-SLC9A3-2 chr5:-:602734-612325 // chr5 // 100 // 100 // 0 // --- // 0
17	TC15000690.hg.1	-0.00301468	0.0341966	0.824635	no	-0.0199134	0.0313336	0.216676	no	560.549	15	+	75315896	75343067	75315896	PPCDC	NM_021823 // PPCDC // phosphopantothenoylcysteine decarboxylase // 15q24.2 // 60490 /// ENST00000342932 // PPCDC // phosphopantothenoylcysteine decarboxylase // 15q24.2 // 60490 /// BC014409 // PPCDC // phosphopantothenoylcysteine decarboxylase // 15q24.2 // 60490 /// OTTHUMT00000286416 // PPCDC // phosphopantothenoylcysteine decarboxylase // 15q24.2 // 60490 /// uc002azo.3 // PPCDC // phosphopan…	NM_021823 // RefSeq // Homo sapiens phosphopantothenoylcysteine decarboxylase (PPCDC), transcript variant 1, mRNA. // chr15 // 100 // 100 // 0 // --- // 0 /// ENST00000342932 // ENSEMBL // phosphopantothenoylcysteine decarboxylase [gene_biotype:protein_coding transcript_biotype:protein_coding] // chr15 // 100 // 100 // 0 // --- // 0 /// BC014409 // GenBank // Homo sapiens phosphopantothenoylcyste…
18	TC21000945.hg.1	-0.00698074	0.0264764	0.773973	no	0.0349664	0.0309283	0.219793	no	600.897	21	-	36314114	36317337	36317337		---	AK026743 // NONCODE // accn=AK026743 class=mRNAlike lncRNA name=Human lncRNA ref=JounralRNA transcriptId=1918 cpcScore=-1.2072600 cnci=-0.3454749 // chr21 // 100 // 100 // 0 // --- // 0
10	TC07002290.hg.1	-0.0341535	0.0127603	0.0463797	no	-0.0254632	0.0141475	0.220212	no	-25.4447	7	+	45241393	45243749	45241393		---	TCONS_00014122 // NONCODE // accn=NULL class=lncRNA name=Human lincRNA ref=BodyMapLinc transcriptId=TCONS_00014122 cpcScore=0.1026960 cnci=-0.1648967 // chr7 // 100 // 100 // 0 // --- // 0
15	TC10000111.hg.1	-0.00155466	0.0158961	0.930681	no	-0.025971	0.00991105	0.220513	no	1570.52	10	+	14694741	14703690	14694741		---	ENST00000443282 // ENSEMBL // havana:known chromosome:GRCh38:10:14652742:14661691:1 gene:ENSG00000236495 gene_biotype:antisense transcript_biotype:antisense // chr10 // 100 // 100 // 0 // --- // 0 /// OTTHUMT00000046908 // Havana transcript // novel transcript[gene_biotype:antisense transcript_biotype:antisense] // chr10 // 100 // 100 // 0 // --- // 0
13	TC08001083.hg.1	-0.00504421	0.00849759	0.770995	no	0.0257758	0.00571664	0.224114	no	610.998	8	-	27560526	27941388	27941388	NUGGC	NM_001010906 // NUGGC // nuclear GTPase, germinal center associated // 8p21.1 // 389643 /// ENST00000413272 // NUGGC // nuclear GTPase, germinal center associated // 8p21.1 // 389643 /// OTTHUMT00000342494 // NUGGC // nuclear GTPase, germinal center associated // 8p21.1 // 389643 /// OTTHUMT00000342495 // NUGGC // nuclear GTPase, germinal center associated // 8p21.1 // 389643 /// uc003xgm.4 // NU…	NM_001010906 // RefSeq // Homo sapiens nuclear GTPase, germinal center associated (NUGGC), mRNA. // chr8 // 100 // 100 // 0 // --- // 0 /// ENST00000413272 // ENSEMBL // nuclear GTPase, germinal center associated [gene_biotype:protein_coding transcript_biotype:protein_coding] // chr8 // 100 // 100 // 0 // --- // 0 /// OTTHUMT00000342494 // Havana transcript // nuclear GTPase, germinal center asso…
4	TC02004468.hg.1	-0.013827	0.0150626	0.299094	no	-0.019427	0.0141153	0.226845	no	40.5009	2	-	105810305	105813861	105813861		---	TCONS_00004364 // NONCODE // accn=NULL class=lncRNA name=Human lincRNA ref=BodyMapLinc transcriptId=TCONS_00004364 cpcScore=-0.7816950 cnci=-0.3161542 // chr2 // 100 // 100 // 0 // --- // 0 /// TCONS_00005222 // NONCODE // accn=NULL class=lncRNA name=Human lincRNA ref=BodyMapLinc transcriptId=TCONS_00005222 cpcScore=-0.5692240 cnci=-0.3193928 // chr2 // 100 // 100 // 0 // --- // 0
10	TC07002287.hg.1	-0.0318423	0.0227657	0.120948	no	-0.0302158	0.0210377	0.227264	no	-5.10799	7	+	45034628	45038116	45034628		---	TCONS_00014119 // NONCODE // accn=NULL class=lncRNA name=Human lincRNA ref=BodyMapLinc transcriptId=TCONS_00014119 cpcScore=-1.0544500 cnci=-0.3966920 // chr7 // 100 // 100 // 0 // --- // 0
8	TC06004081.hg.1	-0.0173168	0.012517	0.360271	no	-0.0274405	0.0244297	0.229471	no	58.4622	6	+	31981167	31981961	31981167	STK19	NM_004197 // STK19 // serine/threonine kinase 19 // 6p21.3 // 8859 /// NM_032454 // STK19 // serine/threonine kinase 19 // 6p21.3 // 8859 /// BC110347 // STK19 // serine/threonine kinase 19 // 6p21.3 // 8859 /// uc003nza.3 // STK19 // serine/threonine kinase 19 // 6p21.3 // 8859 /// uc003nzb.3 // STK19 // serine/threonine kinase 19 // 6p21.3 // 8859 /// X77386 // STK19 // serine/threonine kinase …	NM_004197 // RefSeq // Homo sapiens serine/threonine kinase 19 (STK19), transcript variant 1, mRNA. // chr6 // 100 // 100 // 0 // --- // 0 /// NM_032454 // RefSeq // Homo sapiens serine/threonine kinase 19 (STK19), transcript variant 2, mRNA. // chr6 // 100 // 100 // 0 // --- // 0 /// BC110347 // GenBank // Homo sapiens serine/threonine kinase 19, mRNA (cDNA clone MGC:117388 IMAGE:5165123), compl…
6	TC05002802.hg.1	-0.0187001	0.0398252	0.417136	no	-0.0334142	0.029953	0.232169	no	78.6847	5	-	763495	764229	764229		---	AF251188 // NONCODE // accn=AF251188 class=mRNAlike lncRNA name=Human lncRNA ref=JounralRNA transcriptId=2762 cpcScore=-0.9313390 cnci=-0.1846679 // chr5 // 100 // 100 // 0 // --- // 0
2	TC01000742.hg.1	-0.0509861	0.0288157	0.0365799	no	-0.0353594	0.0256515	0.232683	no	-30.6489	1	+	67882897	67883001	67882897		---	ENST00000411331 // ENSEMBL // RNA, U6 small nuclear 387, pseudogene [gene_biotype:snRNA transcript_biotype:snRNA] // chr1 // 100 // 100 // 0 // --- // 0
6	TC05001098.hg.1	0.0226513	0.0158134	0.136441	no	0.0216302	0.0188588	0.23977	no	-4.50804	5	-	602735	612325	612325		---	ENST00000506629 // ENSEMBL // havana:known chromosome:GRCh38:5:602620:612210:-1 gene:ENSG00000249650 gene_biotype:antisense transcript_biotype:antisense // chr5 // 100 // 100 // 0 // --- // 0 /// OTTHUMT00000367563 // Havana transcript // novel transcript[gene_biotype:antisense transcript_biotype:antisense] // chr5 // 100 // 100 // 0 // --- // 0
11	TC07001476.hg.1	0.00416451	0.0242572	0.818522	no	-0.0254979	0.0179633	0.240459	no	-712.266	7	-	68652820	68654305	68654305		---	ENST00000413094 // ENSEMBL // havana:known chromosome:GRCh38:7:69187833:69189318:-1 gene:ENSG00000236839 gene_biotype:lincRNA transcript_biotype:lincRNA // chr7 // 100 // 100 // 0 // --- // 0 /// OTTHUMT00000344768 // Havana transcript // putative novel transcript[gene_biotype:lincRNA transcript_biotype:lincRNA] // chr7 // 100 // 100 // 0 // --- // 0
12	TC07002652.hg.1	-0.0155234	0.0226939	0.316395	no	-0.0218507	0.015518	0.243167	no	40.7605	7	+	147368771	147370236	147368771		---	CR602570 // NONCODE // accn=CR602570 class=mRNAlike lncRNA name=Human lncRNA ref=JounralRNA transcriptId=3822 cpcScore=-0.8240320 cnci=-0.2080686 // chr7 // 100 // 100 // 0 // --- // 0
3	TC01002871.hg.1	-0.0111456	0.0121729	0.633023	no	-0.0323708	0.029198	0.245973	no	190.436	1	-	93435161	93435267	93435267		---	ENST00000516312 // ENSEMBL // RNA, U6 small nuclear 970, pseudogene [gene_biotype:snRNA transcript_biotype:snRNA] // chr1 // 100 // 100 // 0 // --- // 0
3	TC01000856.hg.1	0.0242203	0.0201902	0.113366	no	0.0210334	0.00895773	0.248836	no	-13.1579	1	+	93311616	93311739	93311616		---	ENST00000384295 // ENSEMBL // Small nucleolar RNA SNORA51 [gene_biotype:snoRNA transcript_biotype:snoRNA] // chr1 // 100 // 100 // 0 // --- // 0
16	TC15000228.hg.1	-0.0277241	0.0180272	0.300944	no	-0.0372843	0.0136353	0.248846	no	34.4832	15	+	33262928	33262992	33262928		---	ENST00000391113 // ENSEMBL // Small nucleolar RNA SNORD77 [gene_biotype:snoRNA transcript_biotype:snoRNA] // chr15 // 100 // 100 // 0 // --- // 0 /// uc021sip.1 // UCSC Genes // Rfam model RF00591 hit found at contig region AC018515.7/88497-88433 // chr15 // 100 // 100 // 0 // --- // 0
8	TC06004124.hg.1	-0.0279698	0.0124916	0.115992	no	-0.0263376	0.0294019	0.250078	no	-5.83578	6	-	32520490	32527779	32527779	HLA-DRB6	NR_001298 // HLA-DRB6 // major histocompatibility complex, class II, DR beta 6 (pseudogene) // 6p21.3 // 3128 /// ENST00000411500 // HLA-DRB6 // major histocompatibility complex, class II, DR beta 6 (pseudogene) // 6p21.3 // 3128 /// L76565 // HLA-DRB6 // major histocompatibility complex, class II, DR beta 6 (pseudogene) // 6p21.3 // 3128 /// uc003obm.1 // HLA-DRB6 // major histocompatibility com…	NR_001298 // RefSeq // Homo sapiens major histocompatibility complex, class II, DR beta 6 (pseudogene) (HLA-DRB6), non-coding RNA. // chr6 // 100 // 100 // 0 // --- // 0 /// ENST00000411500 // ENSEMBL // major histocompatibility complex, class II, DR beta 6 (pseudogene) [gene_biotype:transcribed_unprocessed_pseudogene transcript_biotype:processed_transcript] // chr6 // 100 // 100 // 0 // --- // 0…
15	TC10001054.hg.1	-0.00630185	0.0291631	0.598476	no	-0.0166407	0.0103433	0.250542	no	164.06	10	-	14560556	14816896	14816896	FAM107B	NM_031453 // FAM107B // family with sequence similarity 107, member B // 10p13 // 83641 /// ENST00000181796 // FAM107B // family with sequence similarity 107, member B // 10p13 // 83641 /// ENST00000378458 // FAM107B // family with sequence similarity 107, member B // 10p13 // 83641 /// ENST00000378462 // FAM107B // family with sequence similarity 107, member B // 10p13 // 83641 /// ENST000003784…	NM_031453 // RefSeq // Homo sapiens family with sequence similarity 107, member B (FAM107B), transcript variant 2, mRNA. // chr10 // 100 // 100 // 0 // --- // 0 /// ENST00000181796 // ENSEMBL // family with sequence similarity 107, member B [gene_biotype:protein_coding transcript_biotype:protein_coding] // chr10 // 100 // 100 // 0 // --- // 0 /// ENST00000378458 // ENSEMBL // family with sequence…
16	TC15000226.hg.1	-0.00322765	0.0549872	0.743424	no	-0.0135985	0.0167605	0.253025	no	321.314	15	+	33010175	33026870	33010175	GREM1	NM_001191322 // GREM1 // gremlin 1, DAN family BMP antagonist // 15q13.3 // 26585 /// NM_001191323 // GREM1 // gremlin 1, DAN family BMP antagonist // 15q13.3 // 26585 /// NM_013372 // GREM1 // gremlin 1, DAN family BMP antagonist // 15q13.3 // 26585 /// ENST00000300177 // GREM1 // gremlin 1, DAN family BMP antagonist // 15q13.3 // 26585 /// ENST00000322805 // GREM1 // gremlin 1, DAN family BMP a…	NM_001191322 // RefSeq // Homo sapiens gremlin 1, DAN family BMP antagonist (GREM1), transcript variant 3, mRNA. // chr15 // 100 // 100 // 0 // --- // 0 /// NM_001191323 // RefSeq // Homo sapiens gremlin 1, DAN family BMP antagonist (GREM1), transcript variant 2, mRNA. // chr15 // 100 // 100 // 0 // --- // 0 /// NM_013372 // RefSeq // Homo sapiens gremlin 1, DAN family BMP antagonist (GREM1), tra…
4	TC02004463.hg.1	-0.0195324	0.0137701	0.339488	no	-0.027976	0.0272556	0.254677	no	43.2288	2	-	105323070	105323964	105323964		---	CR616942 // NONCODE // accn=CR616942 class=mRNAlike lncRNA name=Human lncRNA ref=JounralRNA transcriptId=1356 cpcScore=-1.2651700 cnci=-0.4450801 // chr2 // 100 // 100 // 0 // --- // 0
8	TC06001534.hg.1	-0.0148786	0.0184754	0.0871538	no	-0.0119034	0.0245282	0.257509	no	-19.9967	6	-	31629006	31634060	31634060	GPANK1	NM_001199237 // GPANK1 // G-patch domain and ankyrin repeats 1 // 6p21.3 // 7918 /// NM_001199238 // GPANK1 // G-patch domain and ankyrin repeats 1 // 6p21.3 // 7918 /// NM_001199239 // GPANK1 // G-patch domain and ankyrin repeats 1 // 6p21.3 // 7918 /// NM_001199240 // GPANK1 // G-patch domain and ankyrin repeats 1 // 6p21.3 // 7918 /// NM_033177 // GPANK1 // G-patch domain and ankyrin repeats 1…	NM_001199237 // RefSeq // Homo sapiens G patch domain and ankyrin repeats 1 (GPANK1), transcript variant 1, mRNA. // chr6 // 100 // 100 // 0 // --- // 0 /// NM_001199238 // RefSeq // Homo sapiens G patch domain and ankyrin repeats 1 (GPANK1), transcript variant 3, mRNA. // chr6 // 100 // 100 // 0 // --- // 0 /// NM_001199239 // RefSeq // Homo sapiens G patch domain and ankyrin repeats 1 (GPANK1),…
17	TC15001654.hg.1	-0.0355515	0.00929421	0.237009	no	-0.0413423	0.0142023	0.259765	no	16.2883	15	-	75275615	75275717	75275717		---	ENST00000362710 // ENSEMBL // Y RNA [gene_biotype:misc_RNA transcript_biotype:misc_RNA] // chr15 // 100 // 100 // 0 // --- // 0
9	TC07002765.hg.1	0.00218841	0.0249962	0.884704	no	0.0203948	0.0395806	0.263435	no	831.947	7	-	4452562	4456136	4456136		---	TCONS_00013682 // NONCODE // accn=NULL class=lncRNA name=Human lincRNA ref=BodyMapLinc transcriptId=TCONS_00013682 cpcScore=-1.3127400 cnci=-0.2432314 // chr7 // 100 // 100 // 0 // --- // 0
7	TC05003216.hg.1	0.0200138	0.00955211	0.319313	no	0.0270905	0.0162962	0.265019	no	35.3595	5	-	124204487	124211743	124211743		---	TCONS_00010461 // NONCODE // accn=NULL class=lncRNA name=Human lincRNA ref=BodyMapLinc transcriptId=TCONS_00010461 cpcScore=-1.1971900 cnci=-0.3376153 // chr5 // 100 // 100 // 0 // --- // 0
8	TC06003601.hg.1	-0.0225543	0.01301	0.198492	no	-0.0261647	0.0205875	0.267034	no	16.0075	6	-	32520490	32527779	32527779	HLA-DRB6	uc003obm.1 // HLA-DRB6 // major histocompatibility complex, class II, DR beta 6 (pseudogene) // 6p21.3 // 3128 /// uc003obn.1 // HLA-DRB6 // major histocompatibility complex, class II, DR beta 6 (pseudogene) // 6p21.3 // 3128	uc003obm.1 // NONCODE // accn=NULL class=lncRNA name= ref=UCSCGeneNoncode transcriptId=uc003obm.1 cpcScore=4.4323800 cnci=-0.1040019 // chr6 // 100 // 100 // 0 // --- // 0 /// uc003obn.1 // NONCODE // accn=NULL class=lncRNA name= ref=UCSCGeneNoncode transcriptId=uc003obn.1 cpcScore=4.1007400 cnci=-0.1235755 // chr6 // 100 // 100 // 0 // --- // 0
13	TC08001855.hg.1	0.0352819	0.0177702	0.142154	no	0.0322296	0.0266153	0.268026	no	-8.65116	8	+	28621266	28622725	28621266		---	TCONS_00014659 // NONCODE // accn=NULL class=lncRNA name=Human lincRNA ref=BodyMapLinc transcriptId=TCONS_00014659 cpcScore=-0.8046980 cnci=-0.3401241 // chr8 // 100 // 100 // 0 // --- // 0
14	TC09002338.hg.1	-0.031621	0.0289072	0.073871	no	-0.0235316	0.0302987	0.270312	no	-25.5822	9	+	137660930	137661381	137660930		---	AF086191 // NONCODE // accn=AF086191 class=mRNAlike lncRNA name=Human lncRNA ref=JounralRNA transcriptId=4280 cpcScore=-0.8795050 cnci=-0.3945896 // chr9 // 100 // 100 // 0 // --- // 0
18	TC21000692.hg.1	-0.0178218	0.0115711	0.115928	no	-0.0150608	0.0122884	0.272353	no	-15.4924	21	+	36096105	36109479	36096105		---	TCONS_00028746 // NONCODE // accn=NULL class=lncRNA name=Human lincRNA ref=BodyMapLinc transcriptId=TCONS_00028746 cpcScore=-0.9001880 cnci=-0.2353212 // chr21 // 100 // 100 // 0 // --- // 0
8	TC06000385.hg.1	0.0138464	0.0183753	0.645812	no	0.0393708	0.0138915	0.274047	no	184.34	6	+	31795512	31798032	31795512	HSPA1B;HSPA1A	NM_005346 // HSPA1B // heat shock 70kDa protein 1B // 6p21.3 // 3304 /// ENST00000375650 // HSPA1B // heat shock 70kDa protein 1B // 6p21.3 // 3304 /// ENST00000545241 // HSPA1B // heat shock 70kDa protein 1B // 6p21.3 // 3304 /// BC009322 // HSPA1B // heat shock 70kDa protein 1B // 6p21.3 // 3304 /// BC018740 // HSPA1A // heat shock 70kDa protein 1A // 6p21.3 // 3303 /// BC057397 // HSPA1B // he…	NM_005346 // RefSeq // Homo sapiens heat shock 70kDa protein 1B (HSPA1B), mRNA. // chr6 // 100 // 100 // 0 // --- // 0 /// ENST00000375650 // ENSEMBL // heat shock 70kDa protein 1B [gene_biotype:protein_coding transcript_biotype:protein_coding] // chr6 // 100 // 100 // 0 // --- // 0 /// ENST00000545241 // ENSEMBL // heat shock 70kDa protein 1B [gene_biotype:protein_coding transcript_biotype:prote…
8	TC06000383.hg.1	-0.00747176	0.0258305	0.162426	no	-0.00705257	0.0261562	0.274652	no	-5.61024	6	+	31707725	31732628	31707725	SAPCD1;MSH5;MSH5-SAPCD1	NM_001039651 // SAPCD1 // suppressor APC domain containing 1 // 6p21.33 // 401251 /// NM_002441 // MSH5 // mutS homolog 5 // 6p21.3 // 4439 /// NM_025259 // MSH5 // mutS homolog 5 // 6p21.3 // 4439 /// NM_172165 // MSH5 // mutS homolog 5 // 6p21.3 // 4439 /// NM_172166 // MSH5 // mutS homolog 5 // 6p21.3 // 4439 /// NR_037846 // MSH5-SAPCD1 // MSH5-SAPCD1 readthrough (NMD candidate) // 6p // 1005…	NM_001039651 // RefSeq // Homo sapiens suppressor APC domain containing 1 (SAPCD1), mRNA. // chr6 // 100 // 100 // 0 // --- // 0 /// NM_002441 // RefSeq // Homo sapiens mutS homolog 5 (MSH5), transcript variant 3, mRNA. // chr6 // 100 // 100 // 0 // --- // 0 /// NM_025259 // RefSeq // Homo sapiens mutS homolog 5 (MSH5), transcript variant 1, mRNA. // chr6 // 100 // 100 // 0 // --- // 0 /// NM_172…
16	TC15001182.hg.1	0.0119936	0.00802931	0.196111	no	0.0121967	0.0198608	0.280078	no	1.69347	15	-	33009471	33011208	33011208	LOC100131315	ENST00000558441 // LOC100131315 // uncharacterized LOC100131315 // 15q13.3 // 100131315 /// ENST00000560363 // LOC100131315 // uncharacterized LOC100131315 // 15q13.3 // 100131315	ENST00000558441 // ENSEMBL // havana:known chromosome:GRCh38:15:32717270:32719007:-1 gene:ENSG00000259721 gene_biotype:lincRNA transcript_biotype:lincRNA // chr15 // 100 // 100 // 0 // --- // 0 /// ENST00000560363 // ENSEMBL // havana:known chromosome:GRCh38:15:32718101:32718854:-1 gene:ENSG00000259721 gene_biotype:lincRNA transcript_biotype:lincRNA // chr15 // 100 // 100 // 0 // --- // 0 /// AX7…
10	TC07000278.hg.1	-0.00559873	0.0200354	0.637363	no	-0.0158738	0.012654	0.281113	no	183.525	7	+	44836235	44864163	44836235	PPIA	NM_021130 // PPIA // peptidylprolyl isomerase A (cyclophilin A) // 7p13 // 5478 /// ENST00000355968 // PPIA // peptidylprolyl isomerase A (cyclophilin A) // 7p13 // 5478 /// ENST00000451562 // PPIA // peptidylprolyl isomerase A (cyclophilin A) // 7p13 // 5478 /// ENST00000468812 // PPIA // peptidylprolyl isomerase A (cyclophilin A) // 7p13 // 5478 /// ENST00000480603 // PPIA // peptidylprolyl iso…	NM_021130 // RefSeq // Homo sapiens peptidylprolyl isomerase A (cyclophilin A) (PPIA), transcript variant 1, mRNA. // chr7 // 100 // 100 // 0 // --- // 0 /// ENST00000355968 // ENSEMBL // peptidylprolyl isomerase A (cyclophilin A) [gene_biotype:protein_coding transcript_biotype:protein_coding] // chr7 // 100 // 100 // 0 // --- // 0 /// ENST00000451562 // ENSEMBL // peptidylprolyl isomerase A (cyc…
10	TC07001352.hg.1	0.00352489	0.00674461	0.894123	no	-0.0341955	0.0138901	0.282429	no	-1070.11	7	-	45143948	45144081	45144081	SNORA5A	NR_002919 // SNORA5A // small nucleolar RNA, H/ACA box 5A // 7p13 // 654319 /// ENST00000384111 // SNORA5A // small nucleolar RNA, H/ACA box 5A // 7p13 // 654319 /// NR_002919 // SNORA5A // small nucleolar RNA, H/ACA box 5A // 7p13 // 654319	NR_002919 // RefSeq // Homo sapiens small nucleolar RNA, H/ACA box 5A (SNORA5A), small nucleolar RNA. // chr7 // 100 // 100 // 0 // --- // 0 /// ENST00000384111 // ENSEMBL // small nucleolar RNA, H/ACA box 5A [gene_biotype:snoRNA transcript_biotype:snoRNA] // chr7 // 100 // 100 // 0 // --- // 0 /// NR_002919 // NONCODE // accn=NR_002919 class=lncRNA name= ref=RefGeneNoncode transcriptId=NR_002919…
10	TC07001342.hg.1	-0.00285964	0.0188665	0.524355	no	-0.00582863	0.0213214	0.282983	no	103.824	7	-	44552134	44580914	44580914	NPC1L1	NM_001101648 // NPC1L1 // NPC1-like 1 // 7p13 // 29881 /// NM_013389 // NPC1L1 // NPC1-like 1 // 7p13 // 29881 /// ENST00000289547 // NPC1L1 // NPC1-like 1 // 7p13 // 29881 /// ENST00000381160 // NPC1L1 // NPC1-like 1 // 7p13 // 29881 /// ENST00000423141 // NPC1L1 // NPC1-like 1 // 7p13 // 29881 /// ENST00000546276 // NPC1L1 // NPC1-like 1 // 7p13 // 29881 /// AF192523 // NPC1L1 // NPC1-like 1 //…	NM_001101648 // RefSeq // Homo sapiens NPC1-like 1 (NPC1L1), transcript variant 2, mRNA. // chr7 // 100 // 100 // 0 // --- // 0 /// NM_013389 // RefSeq // Homo sapiens NPC1-like 1 (NPC1L1), transcript variant 1, mRNA. // chr7 // 100 // 100 // 0 // --- // 0 /// ENST00000289547 // ENSEMBL // NPC1-like 1 [gene_biotype:protein_coding transcript_biotype:protein_coding] // chr7 // 100 // 100 // 0 // --…
18	TC21000140.hg.1	0.00835899	0.00656539	0.427945	no	0.0136615	0.019536	0.284575	no	63.4353	21	+	36118054	36157183	36118054	LINC01426	NR_038885 // LINC01426 // long intergenic non-protein coding RNA 1426 // --- // 100506385 /// NR_038886 // LINC01426 // long intergenic non-protein coding RNA 1426 // --- // 100506385 /// ENST00000419921 // LINC01426 // long intergenic non-protein coding RNA 1426 // --- // 100506385 /// ENST00000420877 // LINC01426 // long intergenic non-protein coding RNA 1426 // --- // 100506385	NR_038885 // RefSeq // Homo sapiens long intergenic non-protein coding RNA 1426 (LINC01426), transcript variant 1, long non-coding RNA. // chr21 // 100 // 100 // 0 // --- // 0 /// NR_038886 // RefSeq // Homo sapiens long intergenic non-protein coding RNA 1426 (LINC01426), transcript variant 2, long non-coding RNA. // chr21 // 100 // 100 // 0 // --- // 0 /// ENST00000419921 // ENSEMBL // long inte…
6	TC05001092.hg.1	-0.0216046	0.043346	0.0549316	no	-0.0145246	0.0159539	0.28471	no	-32.7708	5	-	204872	218330	218330	CCDC127	NM_145265 // CCDC127 // coiled-coil domain containing 127 // 5p15.33 // 133957 /// ENST00000296824 // CCDC127 // coiled-coil domain containing 127 // 5p15.33 // 133957 /// BC015349 // CCDC127 // coiled-coil domain containing 127 // 5p15.33 // 133957 /// OTTHUMT00000365459 // CCDC127 // coiled-coil domain containing 127 // 5p15.33 // 133957 /// OTTHUMT00000365460 // CCDC127 // coiled-coil domain c…	NM_145265 // RefSeq // Homo sapiens coiled-coil domain containing 127 (CCDC127), mRNA. // chr5 // 100 // 100 // 0 // --- // 0 /// ENST00000296824 // ENSEMBL // coiled-coil domain containing 127 [gene_biotype:protein_coding transcript_biotype:protein_coding] // chr5 // 100 // 100 // 0 // --- // 0 /// BC015349 // GenBank // Homo sapiens coiled-coil domain containing 127, mRNA (cDNA clone MGC:21397 …
16	TC15000227.hg.1	0.0224085	0.0116478	0.403476	no	0.0337911	0.0172066	0.286884	no	50.7961	15	+	33187401	33187502	33187401		---	ENST00000459314 // ENSEMBL // ncrna:snoRNA chromosome:GRCh37:15:33187401:33187502:1 gene:ENSG00000238342 gene_biotype:snoRNA transcript_biotype:snoRNA // chr15 // 100 // 100 // 0 // --- // 0
18	TC21000139.hg.1	0.00761116	0.0169442	0.481349	no	0.013846	0.00907971	0.288216	no	81.9169	21	+	36096105	36109479	36096105	LINC00160	NR_024351 // LINC00160 // long intergenic non-protein coding RNA 160 // 21q22.12 // 54064	NR_024351 // RefSeq // Homo sapiens long intergenic non-protein coding RNA 160 (LINC00160), long non-coding RNA. // chr21 // 100 // 100 // 0 // --- // 0 /// uc011ady.1 // UCSC Genes // --- // chr21 // 100 // 100 // 0 // --- // 0
8	TC06000387.hg.1	0.0175848	0.00391812	0.183275	no	0.016847	0.0250886	0.290285	no	-4.19561	6	+	31851538	31851831	31851538		---	ENST00000434689 // ENSEMBL // EHMT2 antisense RNA 1 [gene_biotype:antisense transcript_biotype:antisense] // chr6 // 100 // 100 // 0 // --- // 0 /// OTTHUMT00000127878 // Havana transcript // novel transcript, antisense to EHMT2[gene_biotype:antisense transcript_biotype:antisense] // chr6 // 100 // 100 // 0 // --- // 0
6	TC05002173.hg.1	0.00115258	0.0177307	0.933156	no	0.0173627	0.0219669	0.291201	no	1406.41	5	+	468367	472052	468367		---	uc003jbb.1 // NONCODE // accn=NULL class=lncRNA name= ref=UCSCGeneNoncode transcriptId=uc003jbb.1 cpcScore=-0.9102790 cnci=-0.1947790 // chr5 // 100 // 100 // 0 // --- // 0
2	TC01000744.hg.1	0.0140055	0.0129481	0.577083	no	0.032104	0.0172425	0.29201	no	129.224	1	+	68006810	68006916	68006810		---	ENST00000384773 // ENSEMBL // RNA, U6 small nuclear 1031, pseudogene [gene_biotype:snRNA transcript_biotype:snRNA] // chr1 // 100 // 100 // 0 // --- // 0
8	TC06004118.hg.1	-0.00975635	0.0164961	0.242121	no	-0.0105806	0.0162036	0.294578	no	8.44813	6	-	31694815	31698040	31698040	DDAH2	NM_013974 // DDAH2 // dimethylarginine dimethylaminohydrolase 2 // 6p21.3 // 23564 /// ENST00000375787 // DDAH2 // dimethylarginine dimethylaminohydrolase 2 // 6p21.3 // 23564 /// ENST00000375789 // DDAH2 // dimethylarginine dimethylaminohydrolase 2 // 6p21.3 // 23564 /// ENST00000480913 // DDAH2 // dimethylarginine dimethylaminohydrolase 2 // 6p21.3 // 23564 /// AK026191 // DDAH2 // dimethylargi…	NM_013974 // RefSeq // Homo sapiens dimethylarginine dimethylaminohydrolase 2 (DDAH2), transcript variant 2, mRNA. // chr6 // 100 // 100 // 0 // --- // 0 /// ENST00000375787 // ENSEMBL // dimethylarginine dimethylaminohydrolase 2 [gene_biotype:protein_coding transcript_biotype:protein_coding] // chr6 // 100 // 100 // 0 // --- // 0 /// ENST00000375789 // ENSEMBL // dimethylarginine dimethylaminohy…
7	TC05002602.hg.1	-0.0207565	0.0108474	0.109017	no	-0.0164355	0.006335	0.295212	no	-20.8179	5	+	124372381	124486527	124372381		---	TCONS_l2_00022505-XLOC_l2_011744 // Broad TUCP // linc-GRAMD3-2 chr5:+:124372380-124486527 // chr5 // 100 // 100 // 0 // --- // 0 /// TCONS_l2_00022506-XLOC_l2_011744 // Broad TUCP // linc-GRAMD3-2 chr5:+:124372531-124400970 // chr5 // 100 // 100 // 0 // --- // 0 /// TCONS_l2_00023529-XLOC_l2_011744 // Broad TUCP // linc-GRAMD3-2 chr5:+:124443896-124485622 // chr5 // 100 // 100 // 0 // --- // 0
8	TC06001549.hg.1	-0.00766137	0.00923336	0.303981	no	-0.00931532	0.0175628	0.297735	no	21.5882	6	-	31830969	31846823	31846823	SLC44A4	NM_001178044 // SLC44A4 // solute carrier family 44, member 4 // 6p21.3 // 80736 /// NM_001178045 // SLC44A4 // solute carrier family 44, member 4 // 6p21.3 // 80736 /// NM_025257 // SLC44A4 // solute carrier family 44, member 4 // 6p21.3 // 80736 /// ENST00000229729 // SLC44A4 // solute carrier family 44, member 4 // 6p21.3 // 80736 /// ENST00000375562 // SLC44A4 // solute carrier family 44, mem…	NM_001178044 // RefSeq // Homo sapiens solute carrier family 44, member 4 (SLC44A4), transcript variant 2, mRNA. // chr6 // 100 // 100 // 0 // --- // 0 /// NM_001178045 // RefSeq // Homo sapiens solute carrier family 44, member 4 (SLC44A4), transcript variant 3, mRNA. // chr6 // 100 // 100 // 0 // --- // 0 /// NM_025257 // RefSeq // Homo sapiens solute carrier family 44, member 4 (SLC44A4), trans…
14	TC09000795.hg.1	-0.00446101	0.00916536	0.599028	no	-0.0105835	0.0296454	0.301834	no	137.244	9	+	138371648	138380739	138371648	PPP1R26	NM_014811 // PPP1R26 // protein phosphatase 1, regulatory subunit 26 // 9q34.3 // 9858 /// ENST00000356818 // PPP1R26 // protein phosphatase 1, regulatory subunit 26 // 9q34.3 // 9858 /// BC047935 // PPP1R26 // protein phosphatase 1, regulatory subunit 26 // 9q34.3 // 9858 /// OTTHUMT00000054987 // PPP1R26 // protein phosphatase 1, regulatory subunit 26 // 9q34.3 // 9858 /// OTTHUMT00000054988 //…	NM_014811 // RefSeq // Homo sapiens protein phosphatase 1, regulatory subunit 26 (PPP1R26), mRNA. // chr9 // 100 // 100 // 0 // --- // 0 /// ENST00000356818 // ENSEMBL // protein phosphatase 1, regulatory subunit 26 [gene_biotype:protein_coding transcript_biotype:protein_coding] // chr9 // 100 // 100 // 0 // --- // 0 /// BC047935 // GenBank // Homo sapiens KIAA0649, mRNA (cDNA clone MGC:49888 IMA…
6	TC05002801.hg.1	-0.00125742	0.00722117	0.912498	no	0.0141268	0.0245406	0.302932	no	1223.47	5	-	710470	767576	767576		---	TCONS_l2_00022720-XLOC_l2_011901 // Broad TUCP // linc-TPPP-1 chr5:-:710469-733896 // chr5 // 100 // 100 // 0 // --- // 0 /// TCONS_l2_00022721-XLOC_l2_011901 // Broad TUCP // linc-TPPP-1 chr5:-:710868-712357 // chr5 // 100 // 100 // 0 // --- // 0 /// TCONS_l2_00022722-XLOC_l2_011901 // Broad TUCP // linc-TPPP-1 chr5:-:712051-741743 // chr5 // 100 // 100 // 0 // --- // 0 /// TCONS_l2_00022723-XLO…
17	TC15002285.hg.1	0.0101657	0.0136306	0.514191	no	0.0192952	0.0342503	0.303706	no	89.8073	15	+	75288945	75289555	75288945		---	uc010bki.1 // NONCODE // accn=NULL class=lncRNA name= ref=UCSCGeneNoncode transcriptId=uc010bki.1 cpcScore=-1.0402200 cnci=-0.2434042 // chr15 // 100 // 100 // 0 // --- // 0
16	TC15002472.hg.1	-0.0201054	0.0125033	0.390124	no	0.0286456	0.0180972	0.311765	no	242.477	15	-	33397959	33398437	33398437		---	AJ227904 // NONCODE // accn=AJ227904 class=mRNAlike lncRNA name=Human lncRNA ref=JounralRNA transcriptId=68 cpcScore=-1.0687800 cnci=-0.3346560 // chr15 // 100 // 100 // 0 // --- // 0
11	TC07002394.hg.1	0.0137078	0.0191433	0.512198	no	0.0257189	0.0236733	0.311838	no	87.6223	7	+	69054796	69063004	69054796		---	TCONS_00013495 // NONCODE // accn=NULL class=lncRNA name=Human lincRNA ref=BodyMapLinc transcriptId=TCONS_00013495 cpcScore=-1.2082700 cnci=-0.2422925 // chr7 // 100 // 100 // 0 // --- // 0
14	TC09001703.hg.1	0.0187276	0.0180033	0.287687	no	0.0211388	0.00600192	0.319493	no	12.8756	9	-	137711261	137764464	137764464	LOC101448202	BC058547 // LOC101448202 // uncharacterized LOC101448202 // 9q34.3 // 101448202 /// BC058547 // LOC101448202 // uncharacterized LOC101448202 // 9q34.3 // 101448202 /// uc004cff.3 // LOC101448202 // uncharacterized LOC101448202 // 9q34.3 // 101448202	BC058547 // NONCODE // accn=BC058547 class=mRNAlike lncRNA name=Human lncRNA ref=JounralRNA transcriptId=4281 cpcScore=-0.9054490 cnci=-0.1543043 // chr9 // 100 // 100 // 0 // --- // 0 /// BC058547 // GenBank // Homo sapiens cDNA clone IMAGE:5468304, partial cds. // chr9 // 100 // 100 // 0 // --- // 0 /// uc004cff.3 // UCSC Genes // Homo sapiens uncharacterized LOC101448202 (LOC101448202), non-co…
17	TC15002800.hg.1	0.0205796	0.0146491	0.0608613	no	0.0130368	0.0199409	0.321951	no	-36.6516	15	+	74890843	74901066	74890843	CLK3	AK095335 // CLK3 // CDC like kinase 3 // 15q24 // 1198	AK095335 // GenBank // Homo sapiens cDNA FLJ38016 fis, clone CTONG2012724. // chr15 // 100 // 100 // 0 // --- // 0 /// uc002ayf.1 // UCSC Genes // Homo sapiens cDNA FLJ38016 fis, clone CTONG2012724. // chr15 // 100 // 100 // 0 // --- // 0
8	TC06000382.hg.1	0.0324347	0.0217079	0.13169	no	0.0266159	0.0304114	0.3251	no	-17.94	6	+	31686371	31694491	31686371	C6orf25	NM_025260 // C6orf25 // chromosome 6 open reading frame 25 // 6p21.33 // 80739 /// NM_138272 // C6orf25 // chromosome 6 open reading frame 25 // 6p21.33 // 80739 /// NM_138273 // C6orf25 // chromosome 6 open reading frame 25 // 6p21.33 // 80739 /// NM_138274 // C6orf25 // chromosome 6 open reading frame 25 // 6p21.33 // 80739 /// NM_138275 // C6orf25 // chromosome 6 open reading frame 25 // 6p21.…	NM_025260 // RefSeq // Homo sapiens chromosome 6 open reading frame 25 (C6orf25), transcript variant 1, mRNA. // chr6 // 100 // 100 // 0 // --- // 0 /// NM_138272 // RefSeq // Homo sapiens chromosome 6 open reading frame 25 (C6orf25), transcript variant 2, mRNA. // chr6 // 100 // 100 // 0 // --- // 0 /// NM_138273 // RefSeq // Homo sapiens chromosome 6 open reading frame 25 (C6orf25), transcript …
6	TC05000005.hg.1	-0.00814949	0.0179227	0.0627915	no	-0.0051203	0.0219332	0.325546	no	-37.1704	5	+	271736	438406	271736	AHRR;PDCD6	NM_001242412 // AHRR // aryl-hydrocarbon receptor repressor // 5p15.3 // 57491 /// NM_013232 // PDCD6 // programmed cell death 6 // 5p15.33 // 10016 /// NM_020731 // AHRR // aryl-hydrocarbon receptor repressor // 5p15.3 // 57491 /// ENST00000264933 // PDCD6 // programmed cell death 6 // 5p15.33 // 10016 /// ENST00000316418 // AHRR // aryl-hydrocarbon receptor repressor // 5p15.3 // 57491 /// ENST…	NM_001242412 // RefSeq // Homo sapiens aryl-hydrocarbon receptor repressor (AHRR), transcript variant 2, mRNA. // chr5 // 100 // 100 // 0 // --- // 0 /// NM_013232 // RefSeq // Homo sapiens programmed cell death 6 (PDCD6), transcript variant 1, mRNA. // chr5 // 100 // 100 // 0 // --- // 0 /// NM_020731 // RefSeq // Homo sapiens aryl-hydrocarbon receptor repressor (AHRR), transcript variant 1, mRN…
9	TC07002767.hg.1	0.00866975	0.0151242	0.579129	no	0.0185031	0.0221672	0.326713	no	113.422	7	-	4936899	4938466	4938466		---	BC034306 // NONCODE // accn=BC034306 class=mRNAlike lncRNA name=Human lncRNA ref=JounralRNA transcriptId=3642 cpcScore=-0.1530460 cnci=-0.2515004 // chr7 // 100 // 100 // 0 // --- // 0
6	TC05001091.hg.1	0.00970874	0.0113416	0.769458	no	0.0390196	0.0259603	0.327393	no	301.902	5	-	144202	144312	144312		---	ENST00000362670 // ENSEMBL // Y RNA [gene_biotype:misc_RNA transcript_biotype:misc_RNA] // chr5 // 100 // 100 // 0 // --- // 0
17	TC15002801.hg.1	-0.00101499	0.0137844	0.912763	no	-0.0108815	0.0240899	0.32744	no	972.08	15	+	74900713	74922542	74900713	CLK3	NM_001130028 // CLK3 // CDC like kinase 3 // 15q24 // 1198 /// NM_003992 // CLK3 // CDC like kinase 3 // 15q24 // 1198 /// ENST00000345005 // CLK3 // CDC like kinase 3 // 15q24 // 1198 /// ENST00000395066 // CLK3 // CDC like kinase 3 // 15q24 // 1198 /// ENST00000454830 // CLK3 // CDC like kinase 3 // 15q24 // 1198 /// AB209535 // CLK3 // CDC like kinase 3 // 15q24 // 1198 /// AK096115 // CLK3 //…	NM_001130028 // RefSeq // Homo sapiens CDC-like kinase 3 (CLK3), transcript variant 1, mRNA. // chr15 // 100 // 100 // 0 // --- // 0 /// NM_003992 // RefSeq // Homo sapiens CDC-like kinase 3 (CLK3), transcript variant 2, mRNA. // chr15 // 100 // 100 // 0 // --- // 0 /// ENST00000345005 // ENSEMBL // CDC-like kinase 3 [gene_biotype:protein_coding transcript_biotype:protein_coding] // chr15 // 100 …
8	TC06001541.hg.1	0.0270838	0.00944754	0.159769	no	0.0227514	0.0198931	0.327988	no	-15.9963	6	-	31732087	31733365	31733365		---	ENST00000419679 // ENSEMBL // SAPCD1 antisense RNA 1 [gene_biotype:antisense transcript_biotype:antisense] // chr6 // 100 // 100 // 0 // --- // 0 /// OTTHUMT00000268184 // Havana transcript // putative novel transcript[gene_biotype:antisense transcript_biotype:antisense] // chr6 // 100 // 100 // 0 // --- // 0
10	TC07000280.hg.1	-0.00994967	0.0877174	0.343667	no	-0.0125094	0.020993	0.328434	no	25.7266	7	+	45039074	45116069	45039074	CCM2	NM_001029835 // CCM2 // cerebral cavernous malformation 2 // 7p13 // 83605 /// NM_001167934 // CCM2 // cerebral cavernous malformation 2 // 7p13 // 83605 /// NM_001167935 // CCM2 // cerebral cavernous malformation 2 // 7p13 // 83605 /// NM_031443 // CCM2 // cerebral cavernous malformation 2 // 7p13 // 83605 /// NR_030770 // CCM2 // cerebral cavernous malformation 2 // 7p13 // 83605 /// ENST000002…	NM_001029835 // RefSeq // Homo sapiens cerebral cavernous malformation 2 (CCM2), transcript variant 1, mRNA. // chr7 // 100 // 100 // 0 // --- // 0 /// NM_001167934 // RefSeq // Homo sapiens cerebral cavernous malformation 2 (CCM2), transcript variant 3, mRNA. // chr7 // 100 // 100 // 0 // --- // 0 /// NM_001167935 // RefSeq // Homo sapiens cerebral cavernous malformation 2 (CCM2), transcript var…
11	TC07001479.hg.1	-0.00887094	0.019016	0.683288	no	-0.0253953	0.0208524	0.330435	no	186.275	7	-	68972496	68972608	68972608		---	ENST00000363987 // ENSEMBL // Y RNA [gene_biotype:misc_RNA transcript_biotype:misc_RNA] // chr7 // 100 // 100 // 0 // --- // 0
4	TC02004460.hg.1	0.0112184	0.031497	0.541698	no	0.0215265	0.0087023	0.330567	no	91.8849	2	-	105028610	105030489	105030489	LOC101927331	BC014368 // LOC101927331 // uncharacterized LOC101927331 // --- // 101927331	BC014368 // NONCODE // accn=BC014368 class=mRNAlike lncRNA name=Human lncRNA ref=JounralRNA transcriptId=1353 cpcScore=-1.1251000 cnci=-0.2735750 // chr2 // 100 // 100 // 0 // --- // 0 /// TCONS_00003349 // NONCODE // accn=NULL class=lncRNA name=Human lincRNA ref=BodyMapLinc transcriptId=TCONS_00003349 cpcScore=-1.0896200 cnci=-0.2384441 // chr2 // 100 // 100 // 0 // --- // 0
10	TC07001353.hg.1	0.0111259	0.0159144	0.520639	no	0.0202443	0.0124567	0.334635	no	81.9567	7	-	45144505	45144641	45144641	SNORA5C	NR_002991 // SNORA5C // small nucleolar RNA, H/ACA box 5C // 7p13 // 677796 /// ENST00000364902 // SNORA5C // small nucleolar RNA, H/ACA box 5C // 7p13 // 677796 /// NR_002991 // SNORA5C // small nucleolar RNA, H/ACA box 5C // 7p13 // 677796	NR_002991 // RefSeq // Homo sapiens small nucleolar RNA, H/ACA box 5C (SNORA5C), small nucleolar RNA. // chr7 // 100 // 100 // 0 // --- // 0 /// ENST00000364902 // ENSEMBL // small nucleolar RNA, H/ACA box 5C [gene_biotype:snoRNA transcript_biotype:snoRNA] // chr7 // 100 // 100 // 0 // --- // 0 /// NR_002991 // NONCODE // accn=NR_002991 class=lncRNA name= ref=RefGeneNoncode transcriptId=NR_002991…
8	TC06001551.hg.1	-0.012511	0.0177858	0.317426	no	-0.0145523	0.019924	0.334904	no	16.316	6	-	31867384	31869769	31869769	ZBTB12	NM_181842 // ZBTB12 // zinc finger and BTB domain containing 12 // 6p21.33 // 221527 /// ENST00000375527 // ZBTB12 // zinc finger and BTB domain containing 12 // 6p21.33 // 221527 /// BC043609 // ZBTB12 // zinc finger and BTB domain containing 12 // 6p21.33 // 221527 /// OTTHUMT00000076315 // ZBTB12 // zinc finger and BTB domain containing 12 // 6p21.33 // 221527 /// uc003nyd.1 // ZBTB12 // zinc …	NM_181842 // RefSeq // Homo sapiens zinc finger and BTB domain containing 12 (ZBTB12), mRNA. // chr6 // 100 // 100 // 0 // --- // 0 /// ENST00000375527 // ENSEMBL // zinc finger and BTB domain containing 12 [gene_biotype:protein_coding transcript_biotype:protein_coding] // chr6 // 100 // 100 // 0 // --- // 0 /// BC043609 // GenBank // Homo sapiens zinc finger and BTB domain containing 12, mRNA (c…
7	TC05000584.hg.1	-0.029866	0.0155307	0.184056	no	-0.0261873	0.0317187	0.336378	no	-12.3174	5	+	123805284	123805594	123805284		---	ENST00000510570 // ENSEMBL // havana:known chromosome:GRCh38:5:124469591:124469901:1 gene:ENSG00000250438 gene_biotype:lincRNA transcript_biotype:lincRNA // chr5 // 100 // 100 // 0 // --- // 0 /// OTTHUMT00000371294 // Havana transcript // novel transcript[gene_biotype:lincRNA transcript_biotype:lincRNA] // chr5 // 100 // 100 // 0 // --- // 0
16	TC15001177.hg.1	-0.0347631	0.0152436	0.218478	no	-0.0342467	0.0160621	0.339281	no	-1.4856	15	-	32891573	32891611	32891611		---	DQ588973 // NONCODE // accn=DQ588973 class=piRNA name=piR-56085 ref=NONCODE v2.0 transcriptId=NULL cpcScore=-1.2912300 cnci=-1.0000000 // chr15 // 100 // 100 // 0 // --- // 0 /// DQ588973 // GenBank // Homo sapiens piRNA piR-56085, complete sequence. // chr15 // 100 // 100 // 0 // --- // 0 /// uc021sil.1 // UCSC Genes // Homo sapiens mRNA for FLJ00278 protein. // chr15 // 100 // 100 // 0 // --- /…
14	TC09000793.hg.1	0.0186988	0.00808339	0.223049	no	0.0174777	0.0201774	0.341202	no	-6.53085	9	+	138244530	138246066	138244530		---	ENST00000450850 // ENSEMBL // havana:known chromosome:GRCh38:9:135352684:135354220:1 gene:ENSG00000235572 gene_biotype:lincRNA transcript_biotype:lincRNA // chr9 // 100 // 100 // 0 // --- // 0 /// OTTHUMT00000054981 // NONCODE // putative novel transcript[gene_biotype:lincRNA transcript_biotype:lincRNA] // chr9 // 100 // 100 // 0 // --- // 0
7	TC05000582.hg.1	-0.00142068	0.0157545	0.917621	no	0.0157152	0.0267806	0.341681	no	1206.18	5	+	123731296	123736348	123731296		---	ENST00000510004 // ENSEMBL // havana:known chromosome:GRCh38:5:124395603:124400655:1 gene:ENSG00000251421 gene_biotype:lincRNA transcript_biotype:lincRNA // chr5 // 100 // 100 // 0 // --- // 0 /// ENST00000510853 // ENSEMBL // havana:known chromosome:GRCh38:5:124395947:124400655:1 gene:ENSG00000251662 gene_biotype:lincRNA transcript_biotype:lincRNA // chr5 // 100 // 100 // 0 // --- // 0 /// OTTHU…
9	TC07001110.hg.1	-0.00792393	0.0126392	0.0592853	no	-0.00475105	0.0123224	0.342295	no	-40.0418	7	-	4834285	4923350	4923350	RADIL	NM_018059 // RADIL // Ras association and DIL domains // 7p22.1 // 55698 /// ENST00000399583 // RADIL // Ras association and DIL domains // 7p22.1 // 55698 /// AB058752 // RADIL // Ras association and DIL domains // 7p22.1 // 55698 /// AK000997 // RADIL // Ras association and DIL domains // 7p22.1 // 55698 /// AK294745 // RADIL // Ras association and DIL domains // 7p22.1 // 55698 /// AK296325 //…	NM_018059 // RefSeq // Homo sapiens Ras association and DIL domains (RADIL), mRNA. // chr7 // 100 // 100 // 0 // --- // 0 /// ENST00000399583 // ENSEMBL // Ras association and DIL domains [gene_biotype:protein_coding transcript_biotype:protein_coding] // chr7 // 100 // 100 // 0 // --- // 0 /// AB058752 // GenBank // Homo sapiens KIAA1849 mRNA for KIAA1849 protein. // chr7 // 100 // 100 // 0 // --…
8	TC06001540.hg.1	0.00567507	0.0117487	0.785731	no	0.0235525	0.00780562	0.343631	no	315.018	6	-	31724728	31724830	31724830		---	ENST00000516934 // ENSEMBL // RNA, U6 small nuclear 850, pseudogene [gene_biotype:snRNA transcript_biotype:snRNA] // chr6 // 100 // 100 // 0 // --- // 0
14	TC09002344.hg.1	-0.0203362	0.0165136	0.106746	no	-0.0144559	0.00363095	0.343876	no	-28.9154	9	+	138307020	138307423	138307020		---	TCONS_00016214 // NONCODE // accn=NULL class=lncRNA name=Human lincRNA ref=BodyMapLinc transcriptId=TCONS_00016214 cpcScore=-1.0418100 cnci=-0.1204098 // chr9 // 100 // 100 // 0 // --- // 0
8	TC06003594.hg.1	-0.0128421	0.0141482	0.337751	no	-0.0152136	0.0118464	0.346547	no	18.4673	6	-	31679753	31681842	31681842		---	NR_003673_6 // NONCODE // accn=NR_003673_6 class=lncRNA name= ref=RefGeneNoncode transcriptId=NR_003673_6 cpcScore=2.5571900 cnci=-0.0884359 // chr6 // 100 // 100 // 0 // --- // 0 /// NR_024541_6 // NONCODE // accn=NR_024541_6 class=lncRNA name= ref=RefGeneNoncode transcriptId=NR_024541_6 cpcScore=1.1455800 cnci=-0.0814735 // chr6 // 100 // 100 // 0 // --- // 0
6	TC05002796.hg.1	0.0204161	0.0159751	0.0802143	no	0.0134648	0.0205871	0.346932	no	-34.0481	5	-	470626	473178	473178	PP7080	AK023178 // PP7080 // uncharacterized LOC25845 // 5p15.33 // 25845	AK023178 // NONCODE // accn=AK023178 class=mRNAlike lncRNA name=Human lncRNA ref=JounralRNA transcriptId=5133 cpcScore=2.8478100 cnci=-0.2031593 // chr5 // 100 // 100 // 0 // --- // 0 /// uc003jbd.2 // NONCODE // accn=NULL class=lncRNA name= ref=UCSCGeneNoncode transcriptId=uc003jbd.2 cpcScore=3.1820300 cnci=-0.2014682 // chr5 // 100 // 100 // 0 // --- // 0 /// uc010itb.1 // NONCODE // accn=NULL …
6	TC05002795.hg.1	-0.0129715	0.0242705	0.390153	no	-0.017124	0.0114001	0.347871	no	32.0121	5	-	414939	417808	417808		---	AK096910 // NONCODE // accn=AK096910 class=mRNAlike lncRNA name=Human lncRNA ref=JounralRNA transcriptId=2763 cpcScore=3.9542200 cnci=-0.1532833 // chr5 // 100 // 100 // 0 // --- // 0
9	TC07002768.hg.1	0.0388712	0.0165959	0.0721852	no	0.0239649	0.0239236	0.35234	no	-38.348	7	-	5160941	5184177	5184177	ZNF890P	NR_034163 // ZNF890P // zinc finger protein 890, pseudogene // 7p22.1 // 645700	NR_034163 // NONCODE // accn=NR_034163 class=lncRNA name= ref=RefGeneNoncode transcriptId=NR_034163 cpcScore=2.2009300 cnci=-0.0933621 // chr7 // 100 // 100 // 0 // --- // 0
8	TC06004117.hg.1	-0.00799281	0.0182375	0.412998	no	-0.0109666	0.0437188	0.352493	no	37.2054	6	-	31679548	31681842	31681842	LY6G6E	NR_003673 // LY6G6E // lymphocyte antigen 6 complex, locus G6E (pseudogene) // 6p21.3 // 79136 /// NR_024541 // LY6G6E // lymphocyte antigen 6 complex, locus G6E (pseudogene) // 6p21.3 // 79136 /// AJ315539 // LY6G6E // lymphocyte antigen 6 complex, locus G6E (pseudogene) // 6p21.3 // 79136 /// BC069141 // LY6G6E // lymphocyte antigen 6 complex, locus G6E (pseudogene) // 6p21.3 // 79136 /// NR_00…	NR_003673 // RefSeq // Homo sapiens lymphocyte antigen 6 complex, locus G6E (pseudogene) (LY6G6E), transcript variant 2, non-coding RNA. // chr6 // 100 // 100 // 0 // --- // 0 /// NR_024541 // RefSeq // Homo sapiens lymphocyte antigen 6 complex, locus G6E (pseudogene) (LY6G6E), transcript variant 1, non-coding RNA. // chr6 // 100 // 100 // 0 // --- // 0 /// AJ315539 // GenBank // Homo sapiens mRN…
14	TC09002343.hg.1	0.0119977	0.0108499	0.380503	no	0.0153261	0.0128604	0.352522	no	27.7418	9	+	138244530	138246066	138244530		---	TCONS_00015774 // NONCODE // accn=NULL class=lncRNA name=Human lincRNA ref=BodyMapLinc transcriptId=TCONS_00015774 cpcScore=-0.6980720 cnci=-0.1611980 // chr9 // 100 // 100 // 0 // --- // 0
18	TC21000946.hg.1	0.0188959	0.0108837	0.466229	no	0.0284276	0.0103473	0.357736	no	50.4431	21	-	36410233	36411723	36411723	RUNX1-IT1	NR_026812 // RUNX1-IT1 // RUNX1 intronic transcript 1 // 21q22.12 // 80215	NR_026812 // NONCODE // accn=NR_026812 class=lncRNA name= ref=RefGeneNoncode transcriptId=NR_026812 cpcScore=2.5941800 cnci=-0.2388349 // chr21 // 100 // 100 // 0 // --- // 0
4	TC02004465.hg.1	-0.0135728	0.0152197	0.0876645	no	-0.00879778	0.0319759	0.361347	no	-35.1809	2	-	105413578	105470027	105470027		---	TCONS_00002761 // NONCODE // accn=NULL class=lncRNA name=Human lincRNA ref=BodyMapLinc transcriptId=TCONS_00002761 cpcScore=-1.1243700 cnci=-0.2868347 // chr2 // 100 // 100 // 0 // --- // 0 /// TCONS_00003353 // NONCODE // accn=NULL class=lncRNA name=Human lincRNA ref=BodyMapLinc transcriptId=TCONS_00003353 cpcScore=-0.9785010 cnci=-0.2896743 // chr2 // 100 // 100 // 0 // --- // 0 /// TCONS_00003…
8	TC06000399.hg.1	0.0155494	0.0191748	0.471836	no	0.0249361	0.0260371	0.363214	no	60.3669	6	+	32407619	32412826	32407619	HLA-DRA	NM_019111 // HLA-DRA // major histocompatibility complex, class II, DR alpha // 6p21.3 // 3122 /// ENST00000374982 // HLA-DRA // major histocompatibility complex, class II, DR alpha // 6p21.3 // 3122 /// ENST00000395388 // HLA-DRA // major histocompatibility complex, class II, DR alpha // 6p21.3 // 3122 /// BC032350 // HLA-DRA // major histocompatibility complex, class II, DR alpha // 6p21.3 // 3…	NM_019111 // RefSeq // Homo sapiens major histocompatibility complex, class II, DR alpha (HLA-DRA), mRNA. // chr6 // 100 // 100 // 0 // --- // 0 /// ENST00000374982 // ENSEMBL // major histocompatibility complex, class II, DR alpha [gene_biotype:protein_coding transcript_biotype:protein_coding] // chr6 // 100 // 100 // 0 // --- // 0 /// ENST00000395388 // ENSEMBL // major histocompatibility compl…
12	TC07001985.hg.1	0.00577508	0.0387348	0.767288	no	0.0212544	0.0210394	0.366438	no	268.036	7	-	145372975	145378462	145378462		---	ENST00000422084 // ENSEMBL // havana:known chromosome:GRCh38:7:145675882:145681369:-1 gene:ENSG00000230746 gene_biotype:lincRNA transcript_biotype:lincRNA // chr7 // 100 // 100 // 0 // --- // 0 /// OTTHUMT00000327545 // NONCODE // novel transcript[gene_biotype:lincRNA transcript_biotype:lincRNA] // chr7 // 100 // 100 // 0 // --- // 0
12	TC07003223.hg.1	-0.00855718	0.0060186	0.6092	no	-0.0180493	0.013808	0.370317	no	110.925	7	-	146113435	146113645	146113645		---	AC006315 // NONCODE // accn=AC006315 class=SRP_7SL RNA name=SRP ref=NONCODE v2.0 transcriptId=NULL cpcScore=-1.2525600 cnci=-0.2928376 // chr7 // 100 // 100 // 0 // --- // 0
10	TC07001344.hg.1	-0.0132551	0.0339194	0.245251	no	-0.0122533	0.00842492	0.371731	no	-7.55841	7	-	44617493	44621886	44621886	TMED4	NM_182547 // TMED4 // transmembrane p24 trafficking protein 4 // 7p13 // 222068 /// ENST00000289577 // TMED4 // transmembrane p24 trafficking protein 4 // 7p13 // 222068 /// ENST00000444131 // TMED4 // transmembrane p24 trafficking protein 4 // 7p13 // 222068 /// ENST00000457408 // TMED4 // transmembrane p24 trafficking protein 4 // 7p13 // 222068 /// ENST00000481238 // TMED4 // transmembrane p24…	NM_182547 // RefSeq // Homo sapiens transmembrane p24 trafficking protein 4 (TMED4), transcript variant 1, mRNA. // chr7 // 100 // 100 // 0 // --- // 0 /// ENST00000289577 // ENSEMBL // transmembrane emp24 protein transport domain containing 4 [gene_biotype:protein_coding transcript_biotype:protein_coding] // chr7 // 100 // 100 // 0 // --- // 0 /// ENST00000444131 // ENSEMBL // transmembrane emp2…
6	TC05002794.hg.1	0.00482075	0.00449537	0.770409	no	0.0178357	0.0231484	0.371945	no	269.977	5	-	269973	271631	271631		---	TCONS_00009573 // NONCODE // accn=NULL class=lncRNA name=Human lincRNA ref=BodyMapLinc transcriptId=TCONS_00009573 cpcScore=1.2533900 cnci=-0.1566408 // chr5 // 100 // 100 // 0 // --- // 0
9	TC07001112.hg.1	-0.0201858	0.0197005	0.208181	no	-0.0173288	0.0190993	0.373325	no	-14.1537	7	-	4897364	4901625	4901625	PAPOLB	NM_020144 // PAPOLB // poly(A) polymerase beta // 7p22.1 // 56903 /// ENST00000404991 // PAPOLB // poly(A) polymerase beta // 7p22.1 // 56903 /// BC036653 // PAPOLB // poly(A) polymerase beta // 7p22.1 // 56903 /// OTTHUMT00000323797 // PAPOLB // poly(A) polymerase beta // 7p22.1 // 56903 /// uc003snk.3 // PAPOLB // poly(A) polymerase beta // 7p22.1 // 56903	NM_020144 // RefSeq // Homo sapiens poly(A) polymerase beta (testis specific) (PAPOLB), mRNA. // chr7 // 100 // 100 // 0 // --- // 0 /// ENST00000404991 // ENSEMBL // poly(A) polymerase beta (testis specific) [gene_biotype:protein_coding transcript_biotype:protein_coding] // chr7 // 100 // 100 // 0 // --- // 0 /// BC036653 // GenBank // Homo sapiens poly(A) polymerase beta (testis specific), mRNA…
7	TC05000590.hg.1	-1.0333e-05	0.00752194	0.99966	no	0.0257115	0.0374209	0.379302	no	248929	5	+	124065403	124065848	124065403	RP11-436H11.3	OTTHUMT00000372358 // RP11-436H11.3 // --- // --- // ---	OTTHUMT00000372358 // Havana transcript // [retired]cdna:all chromosome:VEGA52:5:124065403:124065848:1 Gene:OTTHUMG00000163252 // chr5 // 100 // 100 // 0 // --- // 0 /// ENST00000502467 // ENSEMBL // cdna:known chromosome:GRCh37:5:124065403:124065848:1 gene:ENSG00000250530 gene_biotype:antisense transcript_biotype:antisense // chr5 // 100 // 100 // 0 // --- // 0
8	TC06001546.hg.1	0.00911761	0.0124279	0.417727	no	0.0118634	0.0181664	0.380142	no	30.1155	6	-	31777396	31783501	31783501	HSPA1L;HSPA1B	NM_005527 // HSPA1L // heat shock 70kDa protein 1-like // 6p21.3 // 3305 /// ENST00000375654 // HSPA1L // heat shock 70kDa protein 1-like // 6p21.3 // 3305 /// ENST00000417199 // HSPA1B // heat shock 70kDa protein 1B // 6p21.3 // 3304 /// AK315227 // HSPA1L // heat shock 70kDa protein 1-like // 6p21.3 // 3305 /// BC034483 // HSPA1L // heat shock 70kDa protein 1-like // 6p21.3 // 3305 /// OTTHUMT0…	NM_005527 // RefSeq // Homo sapiens heat shock 70kDa protein 1-like (HSPA1L), mRNA. // chr6 // 100 // 100 // 0 // --- // 0 /// ENST00000375654 // ENSEMBL // heat shock 70kDa protein 1-like [gene_biotype:protein_coding transcript_biotype:protein_coding] // chr6 // 100 // 100 // 0 // --- // 0 /// ENST00000417199 // ENSEMBL // heat shock 70kDa protein 1B [gene_biotype:protein_coding transcript_bioty…
14	TC09002339.hg.1	0.00521394	0.0154151	0.779032	no	0.0196729	0.0132129	0.38318	no	277.313	9	+	137828997	137835041	137828997		---	TCONS_00015773 // NONCODE // accn=NULL class=lncRNA name=Human lincRNA ref=BodyMapLinc transcriptId=TCONS_00015773 cpcScore=-0.8161100 cnci=-0.1834137 // chr9 // 100 // 100 // 0 // --- // 0
5	TC04002150.hg.1	0.01913	0.0580862	0.340312	no	0.0207527	0.0253422	0.391449	no	8.48267	4	+	116102449	116191383	116102449		---	TCONS_00008202 // NONCODE // accn=NULL class=lncRNA name=Human lincRNA ref=BodyMapLinc transcriptId=TCONS_00008202 cpcScore=-1.1664400 cnci=-0.4786000 // chr4 // 100 // 100 // 0 // --- // 0
14	TC09001713.hg.1	-0.00157293	0.0115495	0.817484	no	0.00705389	0.022353	0.392897	no	548.455	9	-	138354565	138364095	138364095	PPP1R26-AS1	NR_038969 // PPP1R26-AS1 // PPP1R26 antisense RNA 1 // --- // 100506599	NR_038969 // RefSeq // Homo sapiens PPP1R26 antisense RNA 1 (PPP1R26-AS1), long non-coding RNA. // chr9 // 100 // 100 // 0 // --- // 0 /// ENST00000412464 // ENSEMBL // ensembl_havana_lincrna:lincRNA chromosome:GRCh37:9:138356344:138356726:-1 gene:ENSG00000230200 gene_biotype:lincRNA transcript_biotype:processed_transcript // chr9 // 100 // 100 // 0 // --- // 0 /// ENST00000412464 // NONCODE // a…
4	TC02004461.hg.1	0.0146198	0.00876392	0.281337	no	0.0139846	0.0144409	0.394257	no	-4.34473	2	-	105104914	105136671	105136671	LINC01103	BC040913 // LINC01103 // long intergenic non-protein coding RNA 1103 // 2q12.1 // 101927360	BC040913 // NONCODE // accn=BC040913 class=mRNAlike lncRNA name=Human lncRNA ref=JounralRNA transcriptId=1355 cpcScore=-0.7634260 cnci=-0.3345310 // chr2 // 100 // 100 // 0 // --- // 0 /// TCONS_00003350 // NONCODE // accn=NULL class=lncRNA name=Human lincRNA ref=BodyMapLinc transcriptId=TCONS_00003350 cpcScore=-1.1440600 cnci=-0.3069989 // chr2 // 100 // 100 // 0 // --- // 0
7	TC05002599.hg.1	-0.00914004	0.0180283	0.698696	no	-0.0243238	0.063284	0.396673	no	166.124	5	+	123833015	123840793	123833015		---	linc_luo_1955 // NONCODE // accn=NULL class=lincRNA name=Human lincRNA ref=Scripture Reconstruction LincRNAs By Luo transcriptId=linc_luo_1955 cpcScore=-1.2809900 cnci=-0.1887264 // chr5 // 100 // 100 // 0 // --- // 0
9	TC07002120.hg.1	0.0138895	0.0158127	0.249826	no	0.0124173	0.0220806	0.396897	no	-10.599	7	+	5111691	5112854	5111691	RBAKDN	NR_015343 // RBAKDN // RBAK downstream neighbor (non-protein coding) // 7p22.1 // 389458	NR_015343 // NONCODE // accn=NR_015343 class=lncRNA name= ref=RefGeneNoncode transcriptId=NR_015343 cpcScore=2.9160600 cnci=-0.1338239 // chr7 // 100 // 100 // 0 // --- // 0
14	TC09000800.hg.1	-0.00739639	0.0168156	0.328806	no	-0.00768317	0.00814048	0.397665	no	3.87732	9	+	138466771	138478958	138466771	LINC01502	NR_034016 // LINC01502 // long intergenic non-protein coding RNA 1502 // 9q34.3 // 100130954 /// NR_034017 // LINC01502 // long intergenic non-protein coding RNA 1502 // 9q34.3 // 100130954 /// ENST00000445997 // LINC01502 // long intergenic non-protein coding RNA 1502 // 9q34.3 // 100130954 /// ENST00000447497 // LINC01502 // long intergenic non-protein coding RNA 1502 // 9q34.3 // 100130954 ///…	NR_034016 // RefSeq // Homo sapiens long intergenic non-protein coding RNA 1502 (LINC01502), transcript variant 1, long non-coding RNA. // chr9 // 100 // 100 // 0 // --- // 0 /// NR_034017 // RefSeq // Homo sapiens long intergenic non-protein coding RNA 1502 (LINC01502), transcript variant 2, long non-coding RNA. // chr9 // 100 // 100 // 0 // --- // 0 /// ENST00000445997 // ENSEMBL // long interg…
10	TC07001343.hg.1	-0.00828732	0.023196	0.391682	no	-0.0100939	0.0217802	0.399117	no	21.7995	7	-	44605016	44614650	44614650	DDX56	NM_019082 // DDX56 // DEAD (Asp-Glu-Ala-Asp) box helicase 56 // 7p13 // 54606 /// ENST00000258772 // DDX56 // DEAD (Asp-Glu-Ala-Asp) box helicase 56 // 7p13 // 54606 /// ENST00000431640 // DDX56 // DEAD (Asp-Glu-Ala-Asp) box helicase 56 // 7p13 // 54606 /// ENST00000485367 // DDX56 // DEAD (Asp-Glu-Ala-Asp) box helicase 56 // 7p13 // 54606 /// AK125595 // DDX56 // DEAD (Asp-Glu-Ala-Asp) box helic…	NM_019082 // RefSeq // Homo sapiens DEAD (Asp-Glu-Ala-Asp) box helicase 56 (DDX56), transcript variant 1, mRNA. // chr7 // 100 // 100 // 0 // --- // 0 /// ENST00000258772 // ENSEMBL // DEAD (Asp-Glu-Ala-Asp) box helicase 56 [gene_biotype:protein_coding transcript_biotype:protein_coding] // chr7 // 100 // 100 // 0 // --- // 0 /// ENST00000431640 // ENSEMBL // DEAD (Asp-Glu-Ala-Asp) box helicase 56…
12	TC07000960.hg.1	-0.000860816	0.00809624	0.901918	no	-0.00715069	0.0162219	0.402026	no	730.687	7	+	145813453	148118090	145813453	CNTNAP2	NM_014141 // CNTNAP2 // contactin associated protein-like 2 // 7q35 // 26047 /// ENST00000361727 // CNTNAP2 // contactin associated protein-like 2 // 7q35 // 26047 /// ENST00000463592 // CNTNAP2 // contactin associated protein-like 2 // 7q35 // 26047 /// BC093780 // CNTNAP2 // contactin associated protein-like 2 // 7q35 // 26047 /// CR933671 // CNTNAP2 // contactin associated protein-like 2 // 7q…	NM_014141 // RefSeq // Homo sapiens contactin associated protein-like 2 (CNTNAP2), mRNA. // chr7 // 100 // 100 // 0 // --- // 0 /// ENST00000361727 // ENSEMBL // contactin associated protein-like 2 [gene_biotype:protein_coding transcript_biotype:protein_coding] // chr7 // 100 // 100 // 0 // --- // 0 /// ENST00000463592 // ENSEMBL // contactin associated protein-like 2 [gene_biotype:protein_coding…
17	TC15000685.hg.1	-0.00897029	0.015793	0.369828	no	-0.0100248	0.0155048	0.406154	no	11.7555	15	+	75074425	75095539	75074425	CSK	NM_001127190 // CSK // c-src tyrosine kinase // 15q24.1 // 1445 /// NM_004383 // CSK // c-src tyrosine kinase // 15q24.1 // 1445 /// ENST00000220003 // CSK // c-src tyrosine kinase // 15q24.1 // 1445 /// ENST00000439220 // CSK // c-src tyrosine kinase // 15q24.1 // 1445 /// AK309344 // CSK // c-src tyrosine kinase // 15q24.1 // 1445 /// AK310136 // CSK // c-src tyrosine kinase // 15q24.1 // 1445 …	NM_001127190 // RefSeq // Homo sapiens c-src tyrosine kinase (CSK), transcript variant 2, mRNA. // chr15 // 100 // 100 // 0 // --- // 0 /// NM_004383 // RefSeq // Homo sapiens c-src tyrosine kinase (CSK), transcript variant 1, mRNA. // chr15 // 100 // 100 // 0 // --- // 0 /// ENST00000220003 // ENSEMBL // c-src tyrosine kinase [gene_biotype:protein_coding transcript_biotype:protein_coding] // chr…
6	TC05002793.hg.1	-0.010228	0.0106433	0.614849	no	-0.0205158	0.0144811	0.406516	no	100.585	5	-	214013	217394	217394		---	AK098328 // NONCODE // accn=AK098328 class=mRNAlike lncRNA name=Human lncRNA ref=JounralRNA transcriptId=5132 cpcScore=-0.1902830 cnci=-0.2602593 // chr5 // 100 // 100 // 0 // --- // 0
18	TC21000419.hg.1	0.0142605	0.0160948	0.296295	no	0.0135258	0.0186358	0.408955	no	-5.15212	21	-	35828408	35828535	35828535		---	ENST00000408471 // ENSEMBL // Small nucleolar RNA SNORA11 [gene_biotype:snoRNA transcript_biotype:snoRNA] // chr21 // 100 // 100 // 0 // --- // 0 /// uc021wiu.1 // UCSC Genes // --- // chr21 // 100 // 100 // 0 // --- // 0
9	TC07000044.hg.1	0.0432847	0.0116283	0.125718	no	0.0277431	0.0177687	0.409202	no	-35.9054	7	+	4729111	4729214	4729111		---	ENST00000459143 // ENSEMBL // ncrna:snoRNA chromosome:GRCh37:7:4729111:4729214:1 gene:ENSG00000238781 gene_biotype:snoRNA transcript_biotype:snoRNA // chr7 // 100 // 100 // 0 // --- // 0
14	TC09000796.hg.1	0.0043265	0.00913174	0.531036	no	0.00685777	0.0179903	0.409378	no	58.5061	9	+	138391830	138396519	138391830	MRPS2	NM_016034 // MRPS2 // mitochondrial ribosomal protein S2 // 9q34 // 51116 /// ENST00000241600 // MRPS2 // mitochondrial ribosomal protein S2 // 9q34 // 51116 /// ENST00000371785 // MRPS2 // mitochondrial ribosomal protein S2 // 9q34 // 51116 /// ENST00000488610 // MRPS2 // mitochondrial ribosomal protein S2 // 9q34 // 51116 /// BC008017 // MRPS2 // mitochondrial ribosomal protein S2 // 9q34 // 51…	NM_016034 // RefSeq // Homo sapiens mitochondrial ribosomal protein S2 (MRPS2), transcript variant 1, mRNA. // chr9 // 100 // 100 // 0 // --- // 0 /// ENST00000241600 // ENSEMBL // mitochondrial ribosomal protein S2 [gene_biotype:protein_coding transcript_biotype:protein_coding] // chr9 // 100 // 100 // 0 // --- // 0 /// ENST00000371785 // ENSEMBL // mitochondrial ribosomal protein S2 [gene_bioty…
16	TC15001180.hg.1	-0.0228301	0.0444798	0.326928	no	-0.0231684	0.0380551	0.409676	no	1.48165	15	-	32898619	32907361	32907361		---	ENST00000500941 // ENSEMBL // havana:known chromosome:GRCh38:15:32613733:32615111:1 gene:ENSG00000244952 gene_biotype:lincRNA transcript_biotype:lincRNA // chr15 // 100 // 100 // 0 // --- // 0
1	TC01005479.hg.1	-0.0172549	0.0221882	0.245852	no	-0.0147948	0.00575819	0.411142	no	-14.2574	1	-	50782665	50786833	50786833		---	TCONS_00001492 // NONCODE // accn=NULL class=lncRNA name=Human lincRNA ref=BodyMapLinc transcriptId=TCONS_00001492 cpcScore=-1.3221600 cnci=-0.3527449 // chr1 // 100 // 100 // 0 // --- // 0 /// TCONS_00001493 // NONCODE // accn=NULL class=lncRNA name=Human lincRNA ref=BodyMapLinc transcriptId=TCONS_00001493 cpcScore=-1.3104300 cnci=-0.3803389 // chr1 // 100 // 100 // 0 // --- // 0 /// TCONS_00002…
4	TC02002157.hg.1	0.0206452	0.0110033	0.0930881	no	0.0122176	0.0096175	0.411504	no	-40.8211	2	-	105028685	105030466	105030466		---	ENST00000449772 // ENSEMBL // havana:known chromosome:GRCh38:2:104412227:104414008:-1 gene:ENSG00000225765 gene_biotype:lincRNA transcript_biotype:lincRNA // chr2 // 100 // 100 // 0 // --- // 0 /// OTTHUMT00000329241 // NONCODE // novel transcript[gene_biotype:lincRNA transcript_biotype:lincRNA] // chr2 // 100 // 100 // 0 // --- // 0
8	TC06000397.hg.1	-0.0129845	0.0151587	0.539186	no	-0.0208702	0.0118962	0.41193	no	60.7311	6	+	32320654	32320760	32320654		---	ENST00000411403 // ENSEMBL // RNA, U6 small nuclear 603, pseudogene [gene_biotype:snRNA transcript_biotype:snRNA] // chr6 // 100 // 100 // 0 // --- // 0
16	TC15001183.hg.1	-0.0836938	0.0221086	0.106639	no	-0.0512009	0.0228393	0.412247	no	-38.8235	15	-	33057747	33486897	33486897	FMN1	NM_001103184 // FMN1 // formin 1 // 15q13.3 // 342184 /// ENST00000320930 // FMN1 // formin 1 // 15q13.3 // 342184 /// ENST00000334528 // FMN1 // formin 1 // 15q13.3 // 342184 /// ENST00000558197 // FMN1 // formin 1 // 15q13.3 // 342184 /// ENST00000559047 // FMN1 // formin 1 // 15q13.3 // 342184 /// ENST00000559150 // FMN1 // formin 1 // 15q13.3 // 342184 /// ENST00000561249 // FMN1 // formin 1 …	NM_001103184 // RefSeq // Homo sapiens formin 1 (FMN1), transcript variant 2, mRNA. // chr15 // 100 // 100 // 0 // --- // 0 /// ENST00000320930 // ENSEMBL // formin 1 [gene_biotype:protein_coding transcript_biotype:protein_coding] // chr15 // 100 // 100 // 0 // --- // 0 /// ENST00000334528 // ENSEMBL // formin 1 [gene_biotype:protein_coding transcript_biotype:protein_coding] // chr15 // 100 // 10…
8	TC06002725.hg.1	0.0147766	0.0177772	0.383118	no	0.0168255	0.0254298	0.413263	no	13.8659	6	+	32358287	32361468	32358287	HCG23	NR_044996 // HCG23 // HLA complex group 23 (non-protein coding) // 6p21 // 414764	NR_044996 // NONCODE // accn=NR_044996 class=lncRNA name= ref=RefGeneNoncode transcriptId=NR_044996 cpcScore=-0.9580250 cnci=-0.3584432 // chr6 // 100 // 100 // 0 // --- // 0 /// TCONS_00012469 // NONCODE // accn=NULL class=lncRNA name=Human lincRNA ref=BodyMapLinc transcriptId=TCONS_00012469 cpcScore=-1.3117800 cnci=-0.2500174 // chr6 // 100 // 100 // 0 // --- // 0
4	TC02000643.hg.1	0.00360063	0.0210149	0.706463	no	0.00929819	0.0169889	0.41464	no	158.238	2	+	105760571	105761882	105760571		---	ENST00000436841 // ENSEMBL // havana:known chromosome:GRCh38:2:105144113:105145222:1 gene:ENSG00000226508 gene_biotype:lincRNA transcript_biotype:lincRNA // chr2 // 100 // 100 // 0 // --- // 0 /// ENST00000438148 // ENSEMBL // havana:known chromosome:GRCh38:2:105144142:105145424:1 gene:ENSG00000226508 gene_biotype:lincRNA transcript_biotype:lincRNA // chr2 // 100 // 100 // 0 // --- // 0 /// ENST0…
14	TC09000799.hg.1	0.00343552	0.0164025	0.44886	no	0.00444194	0.0196504	0.416685	no	29.2948	9	+	138453602	138458801	138453602	PAEP	NM_001018049 // PAEP // progestagen-associated endometrial protein // 9q34 // 5047 /// NM_002571 // PAEP // progestagen-associated endometrial protein // 9q34 // 5047 /// ENST00000277508 // PAEP // progestagen-associated endometrial protein // 9q34 // 5047 /// ENST00000371766 // PAEP // progestagen-associated endometrial protein // 9q34 // 5047 /// ENST00000479141 // PAEP // progestagen-associate…	NM_001018049 // RefSeq // Homo sapiens progestagen-associated endometrial protein (PAEP), transcript variant 1, mRNA. // chr9 // 100 // 100 // 0 // --- // 0 /// NM_002571 // RefSeq // Homo sapiens progestagen-associated endometrial protein (PAEP), transcript variant 2, mRNA. // chr9 // 100 // 100 // 0 // --- // 0 /// ENST00000277508 // ENSEMBL // progestagen-associated endometrial protein [gene_b…
9	TC07000048.hg.1	-0.00772257	0.027036	0.742154	no	-0.0232961	0.0247697	0.417203	no	201.663	7	+	5219692	5219793	5219692		---	ENST00000365169 // ENSEMBL // RNA, U6 small nuclear 215, pseudogene [gene_biotype:snRNA transcript_biotype:snRNA] // chr7 // 100 // 100 // 0 // --- // 0
8	TC06003595.hg.1	-0.00411231	0.0243719	0.786525	no	-0.0146749	0.0316672	0.42365	no	256.852	6	-	31939135	31939783	31939783	DXO	AF059253 // DXO // decapping exoribonuclease // 6p21.3 // 1797	AF059253 // NONCODE // accn=AF059253 class=mRNAlike lncRNA name=NULL ref=H-invitational v7.5 transcriptId=HIT000064829_04 cpcScore=1.7304300 cnci=-0.1839996 // chr6 // 100 // 100 // 0 // --- // 0
8	TC06003598.hg.1	-0.00742486	0.0173134	0.404682	no	-0.00851638	0.0167805	0.425036	no	14.7009	6	-	32120579	32122142	32122142	LOC100507547	NR_037169 // LOC100507547 // uncharacterized LOC100507547 // --- // 100507547 /// NR_037170 // LOC100507547 // uncharacterized LOC100507547 // --- // 100507547 /// NR_037171 // LOC100507547 // uncharacterized LOC100507547 // --- // 100507547 /// NR_037172 // LOC100507547 // uncharacterized LOC100507547 // --- // 100507547	NR_037169 // NONCODE // accn=NR_037169 class=lncRNA name= ref=RefGeneNoncode transcriptId=NR_037169 cpcScore=1.4485200 cnci=-0.2828054 // chr6 // 100 // 100 // 0 // --- // 0 /// NR_037170 // NONCODE // accn=NR_037170 class=lncRNA name= ref=RefGeneNoncode transcriptId=NR_037170 cpcScore=1.9786800 cnci=-0.2957736 // chr6 // 100 // 100 // 0 // --- // 0 /// NR_037171 // NONCODE // accn=NR_037171 clas…
16	TC15001184.hg.1	0.0092416	0.0187075	0.787977	no	0.0332341	0.0320525	0.425094	no	259.614	15	-	33256180	33256277	33256277		---	ENST00000408211 // ENSEMBL // ncrna:miRNA chromosome:GRCh37:15:33256180:33256277:-1 gene:ENSG00000221138 gene_biotype:miRNA transcript_biotype:miRNA // chr15 // 100 // 100 // 0 // --- // 0
8	TC06000378.hg.1	-0.00862964	0.0204686	0.606778	no	-0.0162512	0.0257055	0.42661	no	88.3186	6	+	31626106	31628498	31626106		---	ENST00000422049 // ENSEMBL // C6orf47 antisense RNA 1 [gene_biotype:antisense transcript_biotype:antisense] // chr6 // 100 // 100 // 0 // --- // 0 /// OTTHUMT00000127781 // Havana transcript // novel transcript antisense to C6orf47[gene_biotype:antisense transcript_biotype:antisense] // chr6 // 100 // 100 // 0 // --- // 0
13	TC08002265.hg.1	0.0059767	0.0164346	0.631705	no	0.0118395	0.0279656	0.426682	no	98.0941	8	-	28218501	28260218	28260218	ZNF395	AB044751 // ZNF395 // zinc finger protein 395 // 8p21.1 // 55893	AB044751 // NONCODE // accn=AB044751 class=mRNAlike lncRNA name=NULL ref=H-invitational v7.5 transcriptId=HIT000059421 cpcScore=-1.0698800 cnci=-0.0736421 // chr8 // 100 // 100 // 0 // --- // 0
14	TC09002849.hg.1	0.0097701	0.0110138	0.467569	no	0.0128899	0.0278288	0.427289	no	31.9319	9	-	138395119	138398293	138398293	LOC101928525	BC015688 // LOC101928525 // uncharacterized LOC101928525 // 9q34.3 // 101928525	BC015688 // NONCODE // accn=BC015688 class=mRNAlike lncRNA name=Human lncRNA ref=JounralRNA transcriptId=4283 cpcScore=4.6114000 cnci=-0.1108077 // chr9 // 100 // 100 // 0 // --- // 0
1	TC01005476.hg.1	0.0153319	0.0177792	0.427972	no	0.0184355	0.0243195	0.429323	no	20.2431	1	-	50671756	50688799	50688799		---	TCONS_00000520 // NONCODE // accn=NULL class=lncRNA name=Human lincRNA ref=BodyMapLinc transcriptId=TCONS_00000520 cpcScore=-1.1813000 cnci=-0.4376741 // chr1 // 100 // 100 // 0 // --- // 0
7	TC05002601.hg.1	-0.00303321	0.0162147	0.861706	no	-0.0163159	0.0222994	0.433458	no	437.908	5	+	124298627	124317909	124298627		---	TCONS_00010078 // NONCODE // accn=NULL class=lncRNA name=Human lincRNA ref=BodyMapLinc transcriptId=TCONS_00010078 cpcScore=-0.8183510 cnci=-0.3225260 // chr5 // 100 // 100 // 0 // --- // 0 /// TCONS_00010079 // NONCODE // accn=NULL class=lncRNA name=Human lincRNA ref=BodyMapLinc transcriptId=TCONS_00010079 cpcScore=-1.0114600 cnci=-0.3190510 // chr5 // 100 // 100 // 0 // --- // 0
3	TC01002867.hg.1	-0.00280678	0.0088731	0.760565	no	0.00864249	0.0165799	0.433763	no	407.915	1	-	92940318	92952433	92952433	GFI1	NM_001127215 // GFI1 // growth factor independent 1 transcription repressor // 1p22 // 2672 /// NM_001127216 // GFI1 // growth factor independent 1 transcription repressor // 1p22 // 2672 /// NM_005263 // GFI1 // growth factor independent 1 transcription repressor // 1p22 // 2672 /// ENST00000294702 // GFI1 // growth factor independent 1 transcription repressor // 1p22 // 2672 /// ENST00000370332…	NM_001127215 // RefSeq // Homo sapiens growth factor independent 1 transcription repressor (GFI1), transcript variant 2, mRNA. // chr1 // 100 // 100 // 0 // --- // 0 /// NM_001127216 // RefSeq // Homo sapiens growth factor independent 1 transcription repressor (GFI1), transcript variant 3, mRNA. // chr1 // 100 // 100 // 0 // --- // 0 /// NM_005263 // RefSeq // Homo sapiens growth factor independe…
2	TC01002761.hg.1	0.00166523	0.011078	0.936224	no	-0.0194561	0.00794174	0.434952	no	-1268.38	1	-	68238276	68238336	68238336		---	ENST00000459562 // ENSEMBL // RNA, U7 small nuclear 80 pseudogene [gene_biotype:snRNA transcript_biotype:snRNA] // chr1 // 100 // 100 // 0 // --- // 0 /// uc021oop.1 // UCSC Genes // Rfam model RF00066 hit found at contig region AL136120.8/102266-102206 // chr1 // 100 // 100 // 0 // --- // 0
4	TC02000635.hg.1	-0.0188048	0.0210711	0.296499	no	-0.017037	0.0250819	0.436753	no	-9.40094	2	+	105149231	105149442	105149231		---	ENST00000362857 // ENSEMBL // Small nucleolar RNA U3 [gene_biotype:snoRNA transcript_biotype:snoRNA] // chr2 // 100 // 100 // 0 // --- // 0
10	TC07002288.hg.1	-0.00526658	0.00791655	0.757729	no	-0.0161715	0.021954	0.437002	no	207.059	7	+	45039345	45116069	45039345	CCM2	NR_030770 // CCM2 // cerebral cavernous malformation 2 // 7p13 // 83605	NR_030770 // NONCODE // accn=NR_030770 class=lncRNA name= ref=RefGeneNoncode transcriptId=NR_030770 cpcScore=8.3031700 cnci=-0.1778180 // chr7 // 100 // 100 // 0 // --- // 0
7	TC05001732.hg.1	0.0354282	0.0153504	0.0871841	no	0.019376	0.00931671	0.437218	no	-45.3093	5	-	124056705	124057375	124057375		---	ENST00000508427 // ENSEMBL // havana:sense_intronic chromosome:GRCh37:5:124056705:124057375:-1 gene:ENSG00000250647 gene_biotype:sense_intronic transcript_biotype:sense_intronic // chr5 // 100 // 100 // 0 // --- // 0
18	TC21000142.hg.1	0.0202575	0.0214517	0.238289	no	0.0160376	0.0126986	0.438614	no	-20.8311	21	+	36508935	36511519	36508935		---	ENST00000455028 // ENSEMBL // havana:known chromosome:GRCh38:21:35136638:35139222:1 gene:ENSG00000234703 gene_biotype:lincRNA transcript_biotype:lincRNA // chr21 // 100 // 100 // 0 // --- // 0 /// OTTHUMT00000194246 // NONCODE // putative novel transcript[gene_biotype:lincRNA transcript_biotype:lincRNA] // chr21 // 100 // 100 // 0 // --- // 0
15	TC10001913.hg.1	0.00236185	0.00733404	0.885525	no	-0.0154229	0.0127935	0.439814	no	-753.001	10	+	14116287	14129880	14116287	LOC101928453	BC053535 // LOC101928453 // uncharacterized LOC101928453 // 10p13 // 101928453	BC053535 // NONCODE // accn=BC053535 class=mRNAlike lncRNA name=Human lncRNA ref=JounralRNA transcriptId=2426 cpcScore=-0.8991350 cnci=-0.2119782 // chr10 // 100 // 100 // 0 // --- // 0
3	TC01002866.hg.1	-0.00275516	0.0273014	0.804251	no	-0.0102926	0.0193138	0.440769	no	273.575	1	-	92711955	92764566	92764566	GLMN	NM_053274 // GLMN // glomulin, FKBP associated protein // 1p22.1 // 11146 /// ENST00000370360 // GLMN // glomulin, FKBP associated protein // 1p22.1 // 11146 /// ENST00000495852 // GLMN // glomulin, FKBP associated protein // 1p22.1 // 11146 /// AK295971 // GLMN // glomulin, FKBP associated protein // 1p22.1 // 11146 /// BC001257 // GLMN // glomulin, FKBP associated protein // 1p22.1 // 11146 ///…	NM_053274 // RefSeq // Homo sapiens glomulin, FKBP associated protein (GLMN), mRNA. // chr1 // 100 // 100 // 0 // --- // 0 /// ENST00000370360 // ENSEMBL // glomulin, FKBP associated protein [gene_biotype:protein_coding transcript_biotype:protein_coding] // chr1 // 100 // 100 // 0 // --- // 0 /// ENST00000495852 // ENSEMBL // glomulin, FKBP associated protein [gene_biotype:protein_coding transcri…
17	TC15001642.hg.1	0.00529329	0.0162221	0.327571	no	0.00499558	0.0275175	0.440796	no	-5.62429	15	-	74630100	74660081	74660081	CYP11A1	NM_000781 // CYP11A1 // cytochrome P450, family 11, subfamily A, polypeptide 1 // 15q23-q24 // 1583 /// NM_001099773 // CYP11A1 // cytochrome P450, family 11, subfamily A, polypeptide 1 // 15q23-q24 // 1583 /// ENST00000268053 // CYP11A1 // cytochrome P450, family 11, subfamily A, polypeptide 1 // 15q23-q24 // 1583 /// ENST00000358632 // CYP11A1 // cytochrome P450, family 11, subfamily A, polypep…	NM_000781 // RefSeq // Homo sapiens cytochrome P450, family 11, subfamily A, polypeptide 1 (CYP11A1), transcript variant 1, mRNA. // chr15 // 100 // 100 // 0 // --- // 0 /// NM_001099773 // RefSeq // Homo sapiens cytochrome P450, family 11, subfamily A, polypeptide 1 (CYP11A1), transcript variant 2, mRNA. // chr15 // 100 // 100 // 0 // --- // 0 /// ENST00000268053 // ENSEMBL // cytochrome P450, f…
16	TC15002470.hg.1	0.00592203	0.0129658	0.61935	no	0.0111872	0.0204692	0.441965	no	88.908	15	-	33009471	33011208	33011208		---	AX747968 // NONCODE // accn=AX747968 class=mRNAlike lncRNA name=Human lncRNA ref=JounralRNA transcriptId=66 cpcScore=-1.0098100 cnci=-0.0485802 // chr15 // 100 // 100 // 0 // --- // 0
10	TC07001351.hg.1	-0.00410936	0.0138836	0.500091	no	-0.00540164	0.0243539	0.459875	no	31.4471	7	-	45139699	45151646	45151646	TBRG4;SNORA5B	NM_004749 // TBRG4 // transforming growth factor beta regulator 4 // 7p13 // 9238 /// NM_030900 // TBRG4 // transforming growth factor beta regulator 4 // 7p13 // 9238 /// NM_199122 // TBRG4 // transforming growth factor beta regulator 4 // 7p13 // 9238 /// NR_002990 // SNORA5B // small nucleolar RNA, H/ACA box 5B // 7p13 // 677795 /// ENST00000258770 // TBRG4 // transforming growth factor beta r…	NM_004749 // RefSeq // Homo sapiens transforming growth factor beta regulator 4 (TBRG4), transcript variant 1, mRNA. // chr7 // 100 // 100 // 0 // --- // 0 /// NM_030900 // RefSeq // Homo sapiens transforming growth factor beta regulator 4 (TBRG4), transcript variant 2, mRNA. // chr7 // 100 // 100 // 0 // --- // 0 /// NM_199122 // RefSeq // Homo sapiens transforming growth factor beta regulator 4…
5	TC04001488.hg.1	-0.00117964	0.00917981	0.817271	no	0.00450999	0.011007	0.464224	no	482.319	4	-	115748919	116035032	116035032	NDST4	NM_022569 // NDST4 // N-deacetylase/N-sulfotransferase (heparan glucosaminyl) 4 // 4q26 // 64579 /// ENST00000264363 // NDST4 // N-deacetylase/N-sulfotransferase (heparan glucosaminyl) 4 // 4q26 // 64579 /// BC113075 // NDST4 // N-deacetylase/N-sulfotransferase (heparan glucosaminyl) 4 // 4q26 // 64579 /// OTTHUMT00000256427 // NDST4 // N-deacetylase/N-sulfotransferase (heparan glucosaminyl) 4 //…	NM_022569 // RefSeq // Homo sapiens N-deacetylase/N-sulfotransferase (heparan glucosaminyl) 4 (NDST4), mRNA. // chr4 // 100 // 100 // 0 // --- // 0 /// ENST00000264363 // ENSEMBL // N-deacetylase/N-sulfotransferase (heparan glucosaminyl) 4 [gene_biotype:protein_coding transcript_biotype:protein_coding] // chr4 // 100 // 100 // 0 // --- // 0 /// BC113075 // GenBank // Homo sapiens N-deacetylase/N-…
8	TC06001547.hg.1	-0.00122408	0.0154816	0.954991	no	0.0192364	0.018676	0.467127	no	1671.5	6	-	31783320	31785722	31785722	HSPA1A	AK298056 // HSPA1A // heat shock 70kDa protein 1A // 6p21.3 // 3303	AK298056 // GenBank // Homo sapiens cDNA FLJ54370 complete cds, highly similar to Heat shock 70 kDa protein 1. // chr6 // 100 // 100 // 0 // --- // 0 /// uc011dok.1 // UCSC Genes // Homo sapiens cDNA FLJ54370 complete cds, highly similar to Heat shock 70 kDa protein 1. // chr6 // 100 // 100 // 0 // --- // 0
6	TC05002172.hg.1	-0.00770958	0.015662	0.650253	no	-0.0148409	0.0218003	0.474136	no	92.4993	5	+	195893	196449	195893		---	AF086267 // NONCODE // accn=AF086267 class=mRNAlike lncRNA name=Human lncRNA ref=JounralRNA transcriptId=2760 cpcScore=-0.8758120 cnci=-0.2234171 // chr5 // 100 // 100 // 0 // --- // 0
8	TC06003593.hg.1	-0.0028439	0.00926978	0.750959	no	-0.00762502	0.0130938	0.47742	no	168.118	6	-	31654726	31671137	31671137		---	NR_033488_6 // NONCODE // accn=NR_033488_6 class=lncRNA name= ref=RefGeneNoncode transcriptId=NR_033488_6 cpcScore=9.6261500 cnci=-0.0948836 // chr6 // 100 // 100 // 0 // --- // 0 /// NR_033489_6 // NONCODE // accn=NR_033489_6 class=lncRNA name= ref=RefGeneNoncode transcriptId=NR_033489_6 cpcScore=10.2540000 cnci=-0.0895079 // chr6 // 100 // 100 // 0 // --- // 0
6	TC05001094.hg.1	-0.00235931	0.0132652	0.908986	no	0.0175795	0.0126307	0.477993	no	845.112	5	-	441613	443275	443275	EXOC3-AS1	NM_138464 // EXOC3-AS1 // EXOC3 antisense RNA 1 // 5p15.33 // 116349 /// BC029796 // EXOC3-AS1 // EXOC3 antisense RNA 1 // 5p15.33 // 116349	NM_138464 // RefSeq // Homo sapiens chromosome 5 open reading frame 55 (C5orf55), mRNA. // chr5 // 100 // 100 // 0 // --- // 0 /// BC029796 // GenBank // Homo sapiens hypothetical protein BC014011, mRNA (cDNA clone MGC:35369 IMAGE:5183143), complete cds. // chr5 // 100 // 100 // 0 // --- // 0 /// ENST00000408966 // ENSEMBL // EXOC3 antisense RNA 1 [gene_biotype:antisense transcript_biotype:antise…
8	TC06002716.hg.1	-0.00197882	0.00813205	0.894217	no	-0.0127249	0.0177287	0.480226	no	543.052	6	+	31683134	31685581	31683134	LY6G6D	AJ315537 // LY6G6D // lymphocyte antigen 6 complex, locus G6D // 6p21.3 // 58530	AJ315537 // NONCODE // accn=AJ315537 class=mRNAlike lncRNA name=NULL ref=H-invitational v7.5 transcriptId=HIT000247165_04 cpcScore=2.0857900 cnci=-0.1039454 // chr6 // 100 // 100 // 0 // --- // 0
3	TC01000855.hg.1	0.0263256	0.0119152	0.37607	no	0.0252468	0.0200968	0.482039	no	-4.0978	1	+	93303575	93303627	93303575		---	ENST00000515986 // ENSEMBL // ncrna:snoRNA chromosome:GRCh37:1:93303575:93303627:1 gene:ENSG00000251795 gene_biotype:snoRNA transcript_biotype:snoRNA // chr1 // 100 // 100 // 0 // --- // 0 /// uc021opt.1 // UCSC Genes // Rfam model RF00155 hit found at contig region AL162740.13/6246-6298 // chr1 // 100 // 100 // 0 // --- // 0
17	TC15000688.hg.1	-0.00820309	0.0315189	0.408284	no	-0.00835765	0.00663912	0.484083	no	1.88422	15	+	75287876	75313836	75287876	SCAMP5	NM_001178111 // SCAMP5 // secretory carrier membrane protein 5 // 15q24.2 // 192683 /// NM_001178112 // SCAMP5 // secretory carrier membrane protein 5 // 15q24.2 // 192683 /// NM_138967 // SCAMP5 // secretory carrier membrane protein 5 // 15q24.2 // 192683 /// NR_033660 // SCAMP5 // secretory carrier membrane protein 5 // 15q24.2 // 192683 /// ENST00000361900 // SCAMP5 // secretory carrier membra…	NM_001178111 // RefSeq // Homo sapiens secretory carrier membrane protein 5 (SCAMP5), transcript variant 1, mRNA. // chr15 // 100 // 100 // 0 // --- // 0 /// NM_001178112 // RefSeq // Homo sapiens secretory carrier membrane protein 5 (SCAMP5), transcript variant 2, mRNA. // chr15 // 100 // 100 // 0 // --- // 0 /// NM_138967 // RefSeq // Homo sapiens secretory carrier membrane protein 5 (SCAMP5), …
8	TC06003599.hg.1	0.0172416	0.016986	0.212657	no	0.0117739	0.00787257	0.486077	no	-31.7121	6	-	32148745	32152099	32152099	AGER	NR_038190 // AGER // advanced glycosylation end product-specific receptor // 6p21.3 // 177	NR_038190 // NONCODE // accn=NR_038190 class=lncRNA name= ref=RefGeneNoncode transcriptId=NR_038190 cpcScore=10.7732000 cnci=-0.1492489 // chr6 // 100 // 100 // 0 // --- // 0
3	TC01000849.hg.1	-0.0147505	0.0056402	0.242213	no	-0.010575	0.024478	0.486975	no	-28.3071	1	+	92495533	92529093	92495533	EPHX4	NM_173567 // EPHX4 // epoxide hydrolase 4 // 1p22.1 // 253152 /// ENST00000370383 // EPHX4 // epoxide hydrolase 4 // 1p22.1 // 253152 /// ENST00000480758 // EPHX4 // epoxide hydrolase 4 // 1p22.1 // 253152 /// BC041475 // EPHX4 // epoxide hydrolase 4 // 1p22.1 // 253152 /// OTTHUMT00000027985 // EPHX4 // epoxide hydrolase 4 // 1p22.1 // 253152 /// OTTHUMT00000027986 // EPHX4 // epoxide hydrolase …	NM_173567 // RefSeq // Homo sapiens epoxide hydrolase 4 (EPHX4), mRNA. // chr1 // 100 // 100 // 0 // --- // 0 /// ENST00000370383 // ENSEMBL // epoxide hydrolase 4 [gene_biotype:protein_coding transcript_biotype:protein_coding] // chr1 // 100 // 100 // 0 // --- // 0 /// ENST00000480758 // ENSEMBL // epoxide hydrolase 4 [gene_biotype:protein_coding transcript_biotype:processed_transcript] // chr1 …
16	TC15002473.hg.1	-0.00127875	0.0136124	0.860328	no	-0.00604041	0.0288052	0.491387	no	372.367	15	-	33527517	33540604	33540604		---	TCONS_00023613 // NONCODE // accn=NULL class=lncRNA name=Human lincRNA ref=BodyMapLinc transcriptId=TCONS_00023613 cpcScore=3.1694800 cnci=-0.2694651 // chr15 // 100 // 100 // 0 // --- // 0 /// TCONS_00023614 // NONCODE // accn=NULL class=lncRNA name=Human lincRNA ref=BodyMapLinc transcriptId=TCONS_00023614 cpcScore=0.9619650 cnci=-0.2421946 // chr15 // 100 // 100 // 0 // --- // 0 /// TCONS_00023…
6	TC05001095.hg.1	0.00784965	0.0190513	0.307559	no	0.00631041	0.0124961	0.493669	no	-19.6091	5	-	466239	473213	473213	PP7080	NR_024158 // PP7080 // uncharacterized LOC25845 // 5p15.33 // 25845 /// ENST00000342584 // PP7080 // uncharacterized LOC25845 // 5p15.33 // 25845 /// ENST00000510604 // PP7080 // uncharacterized LOC25845 // 5p15.33 // 25845 /// ENST00000510714 // PP7080 // uncharacterized LOC25845 // 5p15.33 // 25845 /// AK023178 // PP7080 // uncharacterized LOC25845 // 5p15.33 // 25845 /// AK023178 // PP7080 // …	NR_024158 // RefSeq // Homo sapiens uncharacterized LOC25845 (PP7080), long non-coding RNA. // chr5 // 100 // 100 // 0 // --- // 0 /// ENST00000342584 // ENSEMBL // uncharacterized LOC25845 [gene_biotype:antisense transcript_biotype:antisense] // chr5 // 100 // 100 // 0 // --- // 0 /// ENST00000510604 // ENSEMBL // uncharacterized LOC25845 [gene_biotype:antisense transcript_biotype:antisense] // …
16	TC15000224.hg.1	-0.00800732	0.0207172	0.314758	no	-0.00649758	0.0365172	0.494989	no	-18.8545	15	+	32933870	32989299	32933870	SCG5	NM_001144757 // SCG5 // secretogranin V // 15q13-q14 // 6447 /// NM_003020 // SCG5 // secretogranin V // 15q13-q14 // 6447 /// ENST00000300175 // SCG5 // secretogranin V // 15q13-q14 // 6447 /// ENST00000413748 // SCG5 // secretogranin V // 15q13-q14 // 6447 /// ENST00000494364 // SCG5 // secretogranin V // 15q13-q14 // 6447 /// ENST00000497208 // SCG5 // secretogranin V // 15q13-q14 // 6447 /// …	NM_001144757 // RefSeq // Homo sapiens secretogranin V (SCG5), transcript variant 1, mRNA. // chr15 // 100 // 100 // 0 // --- // 0 /// NM_003020 // RefSeq // Homo sapiens secretogranin V (SCG5), transcript variant 2, mRNA. // chr15 // 100 // 100 // 0 // --- // 0 /// ENST00000300175 // ENSEMBL // secretogranin V [gene_biotype:protein_coding transcript_biotype:protein_coding] // chr15 // 100 // 100…
8	TC06002717.hg.1	-0.0103657	0.0133077	0.197661	no	-0.00663284	0.0239547	0.500096	no	-36.0116	6	+	31707725	31732624	31707725		---	NR_037846_6 // NONCODE // accn=NR_037846_6 class=lncRNA name= ref=RefGeneNoncode transcriptId=NR_037846_6 cpcScore=9.0420200 cnci=-0.1902134 // chr6 // 100 // 100 // 0 // --- // 0
8	TC06000398.hg.1	0.0054121	0.00498393	0.801805	no	0.0175094	0.0226233	0.500199	no	223.523	6	+	32358287	32361468	32358287	HCG23	NR_044996 // HCG23 // HLA complex group 23 (non-protein coding) // 6p21 // 414764 /// ENST00000426643 // HCG23 // HLA complex group 23 (non-protein coding) // 6p21 // 414764 /// NR_044996 // HCG23 // HLA complex group 23 (non-protein coding) // 6p21 // 414764 /// uc021yvw.1 // HCG23 // HLA complex group 23 (non-protein coding) // 6p21 // 414764	NR_044996 // RefSeq // Homo sapiens HLA complex group 23 (non-protein coding) (HCG23), long non-coding RNA. // chr6 // 100 // 100 // 0 // --- // 0 /// ENST00000426643 // ENSEMBL // HLA complex group 23 (non-protein coding) [gene_biotype:antisense transcript_biotype:antisense] // chr6 // 100 // 100 // 0 // --- // 0 /// NR_044996 // NONCODE // accn=NR_044996 class=lncRNA name= ref=RefGeneNoncode tr…
18	TC21000138.hg.1	-0.00652985	0.0149463	0.597692	no	-0.0101118	0.0233463	0.50025	no	54.8554	21	+	36041688	36090525	36041688	CLIC6	NM_053277 // CLIC6 // chloride intracellular channel 6 // 21q22.12 // 54102 /// ENST00000349499 // CLIC6 // chloride intracellular channel 6 // 21q22.12 // 54102 /// ENST00000360731 // CLIC6 // chloride intracellular channel 6 // 21q22.12 // 54102 /// AF448439 // CLIC6 // chloride intracellular channel 6 // 21q22.12 // 54102 /// OTTHUMT00000194156 // CLIC6 // chloride intracellular channel 6 // 2…	NM_053277 // RefSeq // Homo sapiens chloride intracellular channel 6 (CLIC6), mRNA. // chr21 // 100 // 100 // 0 // --- // 0 /// ENST00000349499 // ENSEMBL // chloride intracellular channel 6 [gene_biotype:protein_coding transcript_biotype:protein_coding] // chr21 // 100 // 100 // 0 // --- // 0 /// ENST00000360731 // ENSEMBL // chloride intracellular channel 6 [gene_biotype:protein_coding transcri…
14	TC09001710.hg.1	0.0150084	0.0141352	0.677245	no	0.0296714	0.0157547	0.502926	no	97.6985	9	-	137797736	137809809	137809809	FCN1	NM_002003 // FCN1 // ficolin (collagen/fibrinogen domain containing) 1 // 9q34 // 2219 /// ENST00000371806 // FCN1 // ficolin (collagen/fibrinogen domain containing) 1 // 9q34 // 2219 /// BC020635 // FCN1 // ficolin (collagen/fibrinogen domain containing) 1 // 9q34 // 2219 /// OTTHUMT00000054963 // FCN1 // ficolin (collagen/fibrinogen domain containing) 1 // 9q34 // 2219 /// uc004cfi.3 // FCN1 //…	NM_002003 // RefSeq // Homo sapiens ficolin (collagen/fibrinogen domain containing) 1 (FCN1), mRNA. // chr9 // 100 // 100 // 0 // --- // 0 /// ENST00000371806 // ENSEMBL // ficolin (collagen/fibrinogen domain containing) 1 [gene_biotype:protein_coding transcript_biotype:protein_coding] // chr9 // 100 // 100 // 0 // --- // 0 /// BC020635 // GenBank // Homo sapiens ficolin (collagen/fibrinogen doma…
10	TC07002923.hg.1	0.0207019	0.013652	0.399754	no	-0.0197396	0.0123749	0.507836	no	-195.352	7	-	44915900	44918584	44918584	PURB	AK057669 // PURB // purine-rich element binding protein B // 7p13 // 5814	AK057669 // NONCODE // accn=AK057669 class=mRNAlike lncRNA name=Human lncRNA ref=JounralRNA transcriptId=3708 cpcScore=0.1864570 cnci=-0.3752291 // chr7 // 100 // 100 // 0 // --- // 0
12	TC07000959.hg.1	-0.0523556	0.0165639	0.428382	no	-0.0520326	0.0201416	0.509453	no	-0.616972	7	+	145694484	145694512	145694484		---	DQ597485 // NONCODE // accn=DQ597485 class=piRNA name=piR-35551 ref=NONCODE v2.0 transcriptId=NULL cpcScore=-1.3260400 cnci=-1.0000000 // chr7 // 100 // 100 // 0 // --- // 0 /// DQ597485 // GenBank // Homo sapiens piRNA piR-35551, complete sequence. // chr7 // 100 // 100 // 0 // --- // 0 /// uc022aol.1 // UCSC Genes // Homo sapiens piRNA piR-35549, complete sequence. // chr7 // 100 // 100 // 0 //…
1	TC01002638.hg.1	-0.0018287	0.0146664	0.717691	no	0.00400424	0.0252268	0.51034	no	318.966	1	-	48998527	50489626	50489626	AGBL4	NM_032785 // AGBL4 // ATP/GTP binding protein-like 4 // 1p33 // 84871 /// ENST00000334103 // AGBL4 // ATP/GTP binding protein-like 4 // 1p33 // 84871 /// ENST00000371836 // AGBL4 // ATP/GTP binding protein-like 4 // 1p33 // 84871 /// ENST00000371838 // AGBL4 // ATP/GTP binding protein-like 4 // 1p33 // 84871 /// ENST00000371839 // AGBL4 // ATP/GTP binding protein-like 4 // 1p33 // 84871 /// ENST0…	NM_032785 // RefSeq // Homo sapiens ATP/GTP binding protein-like 4 (AGBL4), mRNA. // chr1 // 100 // 100 // 0 // --- // 0 /// ENST00000334103 // ENSEMBL // ATP/GTP binding protein-like 4 [gene_biotype:protein_coding transcript_biotype:protein_coding] // chr1 // 100 // 100 // 0 // --- // 0 /// ENST00000371836 // ENSEMBL // ATP/GTP binding protein-like 4 [gene_biotype:protein_coding transcript_bioty…
10	TC07000277.hg.1	0.00231958	0.0143183	0.738919	no	0.00550469	0.0228745	0.512676	no	137.314	7	+	44788180	44810735	44788180	ZMIZ2	NM_031449 // ZMIZ2 // zinc finger, MIZ-type containing 2 // 7p13 // 83637 /// NM_174929 // ZMIZ2 // zinc finger, MIZ-type containing 2 // 7p13 // 83637 /// ENST00000265346 // ZMIZ2 // zinc finger, MIZ-type containing 2 // 7p13 // 83637 /// ENST00000309315 // ZMIZ2 // zinc finger, MIZ-type containing 2 // 7p13 // 83637 /// ENST00000413916 // ZMIZ2 // zinc finger, MIZ-type containing 2 // 7p13 // 8…	NM_031449 // RefSeq // Homo sapiens zinc finger, MIZ-type containing 2 (ZMIZ2), transcript variant 1, mRNA. // chr7 // 100 // 100 // 0 // --- // 0 /// NM_174929 // RefSeq // Homo sapiens zinc finger, MIZ-type containing 2 (ZMIZ2), transcript variant 2, mRNA. // chr7 // 100 // 100 // 0 // --- // 0 /// ENST00000265346 // ENSEMBL // zinc finger, MIZ-type containing 2 [gene_biotype:protein_coding tra…
14	TC09000788.hg.1	-0.014942	0.0216265	0.244921	no	-0.0102829	0.0153576	0.514174	no	-31.1813	9	+	137772654	137779924	137772654	FCN2	NM_004108 // FCN2 // ficolin (collagen/fibrinogen domain containing lectin) 2 // 9q34.3 // 2220 /// NM_015837 // FCN2 // ficolin (collagen/fibrinogen domain containing lectin) 2 // 9q34.3 // 2220 /// ENST00000291744 // FCN2 // ficolin (collagen/fibrinogen domain containing lectin) 2 // 9q34.3 // 2220 /// ENST00000350339 // FCN2 // ficolin (collagen/fibrinogen domain containing lectin) 2 // 9q34.3…	NM_004108 // RefSeq // Homo sapiens ficolin (collagen/fibrinogen domain containing lectin) 2 (FCN2), transcript variant SV0, mRNA. // chr9 // 100 // 100 // 0 // --- // 0 /// NM_015837 // RefSeq // Homo sapiens ficolin (collagen/fibrinogen domain containing lectin) 2 (FCN2), transcript variant SV1, mRNA. // chr9 // 100 // 100 // 0 // --- // 0 /// ENST00000291744 // ENSEMBL // ficolin (collagen/fib…
8	TC06004080.hg.1	-0.00140324	0.027545	0.733476	no	-0.00318167	0.0217635	0.516683	no	126.737	6	+	31982539	32003195	31982539	C4B;C4B_2;C4A	NM_001002029 // C4B // complement component 4B (Chido blood group) // 6p21.3 // 721 /// NM_001242823 // C4B_2 // complement component 4B (Chido blood group), copy 2 // --- // 100293534 /// NM_001252204 // C4A // complement component 4A (Rodgers blood group) // 6p21.3 // 720 /// NM_007293 // C4A // complement component 4A (Rodgers blood group) // 6p21.3 // 720 /// ENST00000425700 // C4B // complem…	NM_001002029 // RefSeq // Homo sapiens complement component 4B (Chido blood group) (C4B), mRNA. // chr6 // 100 // 100 // 0 // --- // 0 /// NM_001242823 // RefSeq // Homo sapiens complement component 4B (Chido blood group), copy 2 (C4B_2), mRNA. // chr6 // 100 // 100 // 0 // --- // 0 /// NM_001252204 // RefSeq // Homo sapiens complement component 4A (Rodgers blood group) (C4A), transcript variant …
13	TC08000223.hg.1	0.0151682	0.0121448	0.357778	no	0.0127553	0.0224411	0.517146	no	-15.9078	8	+	28655659	28656986	28655659		---	ENST00000520055 // ENSEMBL // havana:known chromosome:GRCh38:8:28798142:28799469:1 gene:ENSG00000254034 gene_biotype:antisense transcript_biotype:antisense // chr8 // 100 // 100 // 0 // --- // 0 /// OTTHUMT00000376865 // Havana transcript // novel transcript[gene_biotype:antisense transcript_biotype:antisense] // chr8 // 100 // 100 // 0 // --- // 0
17	TC15001643.hg.1	-0.0140917	0.0066936	0.295092	no	-0.010221	0.0239394	0.519067	no	-27.4679	15	-	74701630	74726300	74726300	SEMA7A	NM_001146029 // SEMA7A // semaphorin 7A, GPI membrane anchor (John Milton Hagen blood group) // 15q22.3-q23 // 8482 /// NM_001146030 // SEMA7A // semaphorin 7A, GPI membrane anchor (John Milton Hagen blood group) // 15q22.3-q23 // 8482 /// NM_003612 // SEMA7A // semaphorin 7A, GPI membrane anchor (John Milton Hagen blood group) // 15q22.3-q23 // 8482 /// ENST00000261918 // SEMA7A // semaphorin 7A…	NM_001146029 // RefSeq // Homo sapiens semaphorin 7A, GPI membrane anchor (John Milton Hagen blood group) (SEMA7A), transcript variant 2, mRNA. // chr15 // 100 // 100 // 0 // --- // 0 /// NM_001146030 // RefSeq // Homo sapiens semaphorin 7A, GPI membrane anchor (John Milton Hagen blood group) (SEMA7A), transcript variant 3, mRNA. // chr15 // 100 // 100 // 0 // --- // 0 /// NM_003612 // RefSeq // …
8	TC06003597.hg.1	-0.0175463	0.0104501	0.258621	no	-0.0121891	0.0190692	0.520708	no	-30.532	6	-	32065954	32085387	32085387	TNXB;ATF6B	U52699 // TNXB // tenascin XB // 6p21.3 // 7148 /// U52701 // ATF6B // activating transcription factor 6 beta // 6p21.3 // 1388	U52699 // NONCODE // accn=U52699 class=mRNAlike lncRNA name=NULL ref=H-invitational v7.5 transcriptId=HIT000220266_03 cpcScore=-1.1577200 cnci=-0.0679826 // chr6 // 100 // 100 // 0 // --- // 0 /// U52701 // NONCODE // accn=U52701 class=mRNAlike lncRNA name=NULL ref=H-invitational v7.5 transcriptId=HIT000220268_03 cpcScore=1.0853000 cnci=-0.1336975 // chr6 // 100 // 100 // 0 // --- // 0
9	TC07000045.hg.1	-0.00190815	0.0194311	0.696506	no	-0.00377196	0.0207297	0.52545	no	97.6764	7	+	4815253	4834026	4815253	AP5Z1	NM_014855 // AP5Z1 // adaptor-related protein complex 5, zeta 1 subunit // 7p22.2 // 9907 /// ENST00000348624 // AP5Z1 // adaptor-related protein complex 5, zeta 1 subunit // 7p22.2 // 9907 /// ENST00000490487 // AP5Z1 // adaptor-related protein complex 5, zeta 1 subunit // 7p22.2 // 9907 /// AB007875 // AP5Z1 // adaptor-related protein complex 5, zeta 1 subunit // 7p22.2 // 9907 /// BC037399 // …	NM_014855 // RefSeq // Homo sapiens adaptor-related protein complex 5, zeta 1 subunit (AP5Z1), mRNA. // chr7 // 100 // 100 // 0 // --- // 0 /// ENST00000348624 // ENSEMBL // adaptor-related protein complex 5, zeta 1 subunit [gene_biotype:protein_coding transcript_biotype:protein_coding] // chr7 // 100 // 100 // 0 // --- // 0 /// ENST00000490487 // ENSEMBL // adaptor-related protein complex 5, zet…
8	TC06001532.hg.1	-0.00441768	0.0103106	0.673468	no	-0.0081618	0.0154789	0.526069	no	84.7531	6	-	31606805	31620482	31620482	BAG6	NM_001098534 // BAG6 // BCL2 associated athanogene 6 // 6p21.3 // 7917 /// NM_001199697 // BAG6 // BCL2 associated athanogene 6 // 6p21.3 // 7917 /// NM_001199698 // BAG6 // BCL2 associated athanogene 6 // 6p21.3 // 7917 /// NM_004639 // BAG6 // BCL2 associated athanogene 6 // 6p21.3 // 7917 /// NM_080702 // BAG6 // BCL2 associated athanogene 6 // 6p21.3 // 7917 /// NM_080703 // BAG6 // BCL2 asso…	NM_001098534 // RefSeq // Homo sapiens BCL2-associated athanogene 6 (BAG6), transcript variant 4, mRNA. // chr6 // 100 // 100 // 0 // --- // 0 /// NM_001199697 // RefSeq // Homo sapiens BCL2-associated athanogene 6 (BAG6), transcript variant 5, mRNA. // chr6 // 100 // 100 // 0 // --- // 0 /// NM_001199698 // RefSeq // Homo sapiens BCL2-associated athanogene 6 (BAG6), transcript variant 6, mRNA. /…
10	TC07002291.hg.1	0.0124559	0.0172815	0.42783	no	0.0119752	0.0117719	0.526685	no	-3.85913	7	+	45431940	45436006	45431940		---	TCONS_00013434 // NONCODE // accn=NULL class=lncRNA name=Human lincRNA ref=BodyMapLinc transcriptId=TCONS_00013434 cpcScore=-1.2055500 cnci=-0.2560179 // chr7 // 100 // 100 // 0 // --- // 0
14	TC09002342.hg.1	0.0188091	0.0147715	0.177653	no	0.0106768	0.0314218	0.527002	no	-43.2361	9	+	138054581	138057152	138054581		---	TCONS_00016213 // NONCODE // accn=NULL class=lncRNA name=Human lincRNA ref=BodyMapLinc transcriptId=TCONS_00016213 cpcScore=-0.9944700 cnci=-0.1818236 // chr9 // 100 // 100 // 0 // --- // 0
2	TC01000743.hg.1	0.0217913	0.0167397	0.0277362	no	0.00732245	0.0203439	0.527852	no	-66.3974	1	+	67995313	67998012	67995313		---	ENST00000230113 // ENSEMBL // havana:known chromosome:GRCh38:1:67529630:67532329:1 gene:ENSG00000235200 gene_biotype:lincRNA transcript_biotype:lincRNA // chr1 // 100 // 100 // 0 // --- // 0 /// OTTHUMT00000025987 // NONCODE // novel transcript[gene_biotype:lincRNA transcript_biotype:lincRNA] // chr1 // 100 // 100 // 0 // --- // 0
10	TC07001348.hg.1	-0.0134526	0.0145132	0.349444	no	-0.0108351	0.0127388	0.531759	no	-19.4571	7	-	45002260	45018704	45018704	MYO1G	NM_033054 // MYO1G // myosin IG // 7p13 // 64005 /// ENST00000258787 // MYO1G // myosin IG // 7p13 // 64005 /// AF380933 // MYO1G // myosin IG // 7p13 // 64005 /// AK097912 // MYO1G // myosin IG // 7p13 // 64005 /// AK131089 // MYO1G // myosin IG // 7p13 // 64005 /// AL832302 // MYO1G // myosin IG // 7p13 // 64005 /// BC041623 // MYO1G // myosin IG // 7p13 // 64005 /// BC113544 // MYO1G // myosin…	NM_033054 // RefSeq // Homo sapiens myosin IG (MYO1G), mRNA. // chr7 // 100 // 100 // 0 // --- // 0 /// ENST00000258787 // ENSEMBL // myosin IG [gene_biotype:protein_coding transcript_biotype:protein_coding] // chr7 // 100 // 100 // 0 // --- // 0 /// AF380933 // GenBank // Homo sapiens unconventional myosin 1G methonine form (MYO1G) mRNA, MYO1G-M allele, partial cds. // chr7 // 100 // 100 // 0 //…
4	TC02002163.hg.1	-0.000217132	0.00575189	0.977857	no	0.00580062	0.00639631	0.538152	no	2771.48	2	-	105481865	105489053	105489053	LINC01159	ENST00000433433 // LINC01159 // long intergenic non-protein coding RNA 1159 // 2q12.1 // 102682016 /// ENST00000434764 // LINC01159 // long intergenic non-protein coding RNA 1159 // 2q12.1 // 102682016 /// AK095498 // LINC01159 // long intergenic non-protein coding RNA 1159 // 2q12.1 // 102682016 /// ENST00000433433 // LINC01159 // long intergenic non-protein coding RNA 1159 // 2q12.1 // 10268201…	ENST00000433433 // ENSEMBL // long intergenic non-protein coding RNA 1159 [gene_biotype:processed_transcript transcript_biotype:lincRNA] // chr2 // 100 // 100 // 0 // --- // 0 /// ENST00000434764 // ENSEMBL // long intergenic non-protein coding RNA 1159 [gene_biotype:processed_transcript transcript_biotype:antisense] // chr2 // 100 // 100 // 0 // --- // 0 /// AK095498 // GenBank // Homo sapiens c…
7	TC05003215.hg.1	-0.00570642	0.0203698	0.723484	no	-0.0118538	0.00864726	0.539024	no	107.728	5	-	123828468	123872041	123872041		---	TCONS_00009773 // NONCODE // accn=NULL class=lncRNA name=Human lincRNA ref=BodyMapLinc transcriptId=TCONS_00009773 cpcScore=-0.7280390 cnci=-0.2590299 // chr5 // 100 // 100 // 0 // --- // 0
11	TC07003007.hg.1	-0.0180819	0.0184655	0.356706	no	-0.0145907	0.0124747	0.539316	no	-19.308	7	-	68747971	68769122	68769122		---	TCONS_00014334 // NONCODE // accn=NULL class=lncRNA name=Human lincRNA ref=BodyMapLinc transcriptId=TCONS_00014334 cpcScore=-0.7071580 cnci=-0.1860301 // chr7 // 100 // 100 // 0 // --- // 0
10	TC07000281.hg.1	0.00308352	0.0247627	0.759143	no	0.00747937	0.032027	0.541266	no	142.56	7	+	45197367	45225901	45197367	RAMP3	NM_005856 // RAMP3 // receptor (G protein-coupled) activity modifying protein 3 // 7p13-p12 // 10268 /// ENST00000242249 // RAMP3 // receptor (G protein-coupled) activity modifying protein 3 // 7p13-p12 // 10268 /// ENST00000481345 // RAMP3 // receptor (G protein-coupled) activity modifying protein 3 // 7p13-p12 // 10268 /// ENST00000496212 // RAMP3 // receptor (G protein-coupled) activity modify…	NM_005856 // RefSeq // Homo sapiens receptor (G protein-coupled) activity modifying protein 3 (RAMP3), mRNA. // chr7 // 100 // 100 // 0 // --- // 0 /// ENST00000242249 // ENSEMBL // receptor (G protein-coupled) activity modifying protein 3 [gene_biotype:protein_coding transcript_biotype:protein_coding] // chr7 // 100 // 100 // 0 // --- // 0 /// ENST00000481345 // ENSEMBL // receptor (G protein-co…
17	TC15002284.hg.1	-0.0264125	0.0233533	0.196962	no	-0.0151	0.0212867	0.543972	no	-42.8302	15	+	75287876	75313836	75287876	SCAMP5	NR_033660 // SCAMP5 // secretory carrier membrane protein 5 // 15q24.2 // 192683	NR_033660 // NONCODE // accn=NR_033660 class=lncRNA name= ref=RefGeneNoncode transcriptId=NR_033660 cpcScore=2.1437000 cnci=-0.1423666 // chr15 // 100 // 100 // 0 // --- // 0
10	TC07002924.hg.1	-0.0166338	0.0126206	0.605957	no	-0.0234701	0.0155393	0.547152	no	41.0987	7	-	44998599	45000392	45000392	LOC285957	AK097526 // LOC285957 // uncharacterized LOC285957 // 7p13 // 285957	AK097526 // NONCODE // accn=AK097526 class=mRNAlike lncRNA name=Human lncRNA ref=JounralRNA transcriptId=3709 cpcScore=-0.9985550 cnci=-0.2207414 // chr7 // 100 // 100 // 0 // --- // 0
3	TC01000851.hg.1	0.0289869	0.0169936	0.0722502	no	0.0116685	0.0170666	0.548844	no	-59.7454	1	+	92632542	92650280	92632542	KIAA1107	NM_015237 // KIAA1107 // KIAA1107 // 1p22.1 // 23285 /// ENST00000370378 // KIAA1107 // KIAA1107 // 1p22.1 // 23285 /// AK302496 // KIAA1107 // KIAA1107 // 1p22.1 // 23285 /// OTTHUMT00000028375 // KIAA1107 // KIAA1107 // 1p22.1 // 23285 /// uc001dop.3 // KIAA1107 // KIAA1107 // 1p22.1 // 23285 /// uc010otd.2 // KIAA1107 // KIAA1107 // 1p22.1 // 23285	NM_015237 // RefSeq // Homo sapiens KIAA1107 (KIAA1107), mRNA. // chr1 // 100 // 100 // 0 // --- // 0 /// ENST00000370378 // ENSEMBL // KIAA1107 [gene_biotype:protein_coding transcript_biotype:protein_coding] // chr1 // 100 // 100 // 0 // --- // 0 /// AK302496 // GenBank // Homo sapiens cDNA FLJ54894 complete cds, weakly similar to Dentin sialophosphoprotein precursor. // chr1 // 100 // 100 // 0 …
6	TC05003403.hg.1	0.00118855	0.0264174	0.842955	no	0.00427407	0.0151083	0.550363	no	259.602	5	-	795720	851101	851101	ZDHHC11	NM_024786 // ZDHHC11 // zinc finger, DHHC-type containing 11 // 5p15.33 // 79844 /// ENST00000283441 // ZDHHC11 // zinc finger, DHHC-type containing 11 // 5p15.33 // 79844 /// ENST00000511539 // ZDHHC11 // zinc finger, DHHC-type containing 11 // 5p15.33 // 79844 /// ENST00000512775 // ZDHHC11 // zinc finger, DHHC-type containing 11 // 5p15.33 // 79844 /// AK024233 // ZDHHC11 // zinc finger, DHHC-…	NM_024786 // RefSeq // Homo sapiens zinc finger, DHHC-type containing 11 (ZDHHC11), mRNA. // chr5 // 100 // 100 // 0 // --- // 0 /// ENST00000283441 // ENSEMBL // zinc finger, DHHC-type containing 11 [gene_biotype:protein_coding transcript_biotype:protein_coding] // chr5 // 100 // 100 // 0 // --- // 0 /// ENST00000511539 // ENSEMBL // zinc finger, DHHC-type containing 11 [gene_biotype:protein_cod…
4	TC02003463.hg.1	0.0273878	0.0185229	0.157581	no	0.0138976	0.00869318	0.55124	no	-49.2563	2	+	105474040	105475032	105474040		---	CR599621 // NONCODE // accn=CR599621 class=mRNAlike lncRNA name=Human lncRNA ref=JounralRNA transcriptId=1358 cpcScore=-1.2168000 cnci=-0.3516275 // chr2 // 100 // 100 // 0 // --- // 0
2	TC01000746.hg.1	0.00159333	0.00687779	0.839193	no	0.00569506	0.0101083	0.552177	no	257.431	1	+	68297971	68668670	68297971	GNG12-AS1	NR_040077 // GNG12-AS1 // GNG12 antisense RNA 1 // 1p31.3 // 100289178 /// ENST00000420587 // GNG12-AS1 // GNG12 antisense RNA 1 // 1p31.3 // 100289178 /// AK096081 // GNG12-AS1 // GNG12 antisense RNA 1 // 1p31.3 // 100289178 /// ENST00000420587 // GNG12-AS1 // GNG12 antisense RNA 1 // 1p31.3 // 100289178 /// uc001deb.2 // GNG12-AS1 // GNG12 antisense RNA 1 // 1p31.3 // 100289178	NR_040077 // RefSeq // Homo sapiens GNG12 antisense RNA 1 (GNG12-AS1), long non-coding RNA. // chr1 // 100 // 100 // 0 // --- // 0 /// ENST00000420587 // ENSEMBL // GNG12 antisense RNA 1 [gene_biotype:antisense transcript_biotype:antisense] // chr1 // 100 // 100 // 0 // --- // 0 /// AK096081 // GenBank // Homo sapiens cDNA FLJ38762 fis, clone KIDNE2013801. // chr1 // 100 // 100 // 0 // --- // 0 /…
8	TC06001548.hg.1	0.0113819	0.0151643	0.193188	no	0.00631743	0.0138209	0.55314	no	-44.4957	6	-	31825436	31830709	31830709	NEU1	NM_000434 // NEU1 // sialidase 1 (lysosomal sialidase) // 6p21.3 // 4758 /// ENST00000375631 // NEU1 // sialidase 1 (lysosomal sialidase) // 6p21.3 // 4758 /// BC000722 // NEU1 // sialidase 1 (lysosomal sialidase) // 6p21.3 // 4758 /// BC011900 // NEU1 // sialidase 1 (lysosomal sialidase) // 6p21.3 // 4758 /// OTTHUMT00000076616 // NEU1 // sialidase 1 (lysosomal sialidase) // 6p21.3 // 4758 /// O…	NM_000434 // RefSeq // Homo sapiens sialidase 1 (lysosomal sialidase) (NEU1), mRNA. // chr6 // 100 // 100 // 0 // --- // 0 /// ENST00000375631 // ENSEMBL // sialidase 1 (lysosomal sialidase) [gene_biotype:protein_coding transcript_biotype:protein_coding] // chr6 // 100 // 100 // 0 // --- // 0 /// BC000722 // GenBank // Homo sapiens sialidase 1 (lysosomal sialidase), mRNA (cDNA clone MGC:1553 IMAG…
10	TC07002286.hg.1	0.00820252	0.0177605	0.564984	no	0.0101032	0.0134558	0.556576	no	23.1715	7	+	45022562	45023645	45022562		---	linc_luo_87 // NONCODE // accn=NULL class=lincRNA name=Human lincRNA ref=Scripture Reconstruction LincRNAs By Luo transcriptId=linc_luo_87 cpcScore=-1.2964800 cnci=-0.1457955 // chr7 // 100 // 100 // 0 // --- // 0
15	TC10001055.hg.1	0.0104959	0.0038932	0.603093	no	0.0148403	0.0321837	0.556753	no	41.3917	10	-	14705394	14705493	14705493		---	ENST00000364896 // ENSEMBL // RNA, 5S ribosomal pseudogene 302 [gene_biotype:rRNA transcript_biotype:rRNA] // chr10 // 100 // 100 // 0 // --- // 0
7	TC05000587.hg.1	-0.000968851	0.017384	0.949398	no	-0.0109345	0.0280808	0.558043	no	1028.6	5	+	124052884	124053638	124052884		---	ENST00000503061 // ENSEMBL // cdna:putative chromosome:GRCh37:5:124052884:124053638:1 gene:ENSG00000250005 gene_biotype:antisense transcript_biotype:antisense // chr5 // 100 // 100 // 0 // --- // 0
9	TC07000043.hg.1	-0.000470434	0.0138808	0.954019	no	-0.00567202	0.020924	0.558942	no	1105.7	7	+	4683388	4811074	4683388	FOXK1	NM_001037165 // FOXK1 // forkhead box K1 // 7p22.1 // 221937 /// ENST00000328914 // FOXK1 // forkhead box K1 // 7p22.1 // 221937 /// BC038434 // FOXK1 // forkhead box K1 // 7p22.1 // 221937 /// OTTHUMT00000323729 // FOXK1 // forkhead box K1 // 7p22.1 // 221937 /// OTTHUMT00000323770 // FOXK1 // forkhead box K1 // 7p22.1 // 221937 /// OTTHUMT00000323795 // FOXK1 // forkhead box K1 // 7p22.1 // 221…	NM_001037165 // RefSeq // Homo sapiens forkhead box K1 (FOXK1), mRNA. // chr7 // 100 // 100 // 0 // --- // 0 /// ENST00000328914 // ENSEMBL // forkhead box K1 [gene_biotype:protein_coding transcript_biotype:protein_coding] // chr7 // 100 // 100 // 0 // --- // 0 /// BC038434 // GenBank HTC // Homo sapiens forkhead box K1, mRNA (cDNA clone IMAGE:5164497). // chr7 // 100 // 100 // 0 // --- // 0 /// …
6	TC05003402.hg.1	0.00644741	0.0083415	0.551809	no	0.00762141	0.00874671	0.560785	no	18.2089	5	-	710472	767323	767323	ZDHHC11B	OTTHUMT00000367532 // ZDHHC11B // zinc finger, DHHC-type containing 11B // 5p15.33 // 653082 /// OTTHUMT00000376355 // ZDHHC11B // zinc finger, DHHC-type containing 11B // 5p15.33 // 653082	OTTHUMT00000367532 // Havana transcript // zinc finger, DHHC-type containing 11B[gene_biotype:protein_coding transcript_biotype:protein_coding] // chr5 // 100 // 100 // 0 // --- // 0 /// OTTHUMT00000376355 // Havana transcript // zinc finger, DHHC-type containing 11B[gene_biotype:protein_coding transcript_biotype:processed_transcript] // chr5 // 100 // 100 // 0 // --- // 0 /// ENST00000382776 // …
7	TC05001727.hg.1	-0.0148462	0.0184072	0.304624	no	-0.0100796	0.0240452	0.562478	no	-32.1067	5	-	123641923	123740772	123740772		---	ENST00000519703 // ENSEMBL // long intergenic non-protein coding RNA 1170 [gene_biotype:lincRNA transcript_biotype:lincRNA] // chr5 // 100 // 100 // 0 // --- // 0 /// ENST00000520192 // ENSEMBL // havana:known chromosome:GRCh38:5:124306230:124386255:-1 gene:ENSG00000253807 gene_biotype:lincRNA transcript_biotype:lincRNA // chr5 // 100 // 100 // 0 // --- // 0 /// OTTHUMT00000374575 // Havana trans…
17	TC15001653.hg.1	0.00546885	0.0136694	0.502038	no	0.00555445	0.022527	0.567104	no	1.56523	15	-	75246757	75249805	75249805	RPP25	NM_017793 // RPP25 // ribonuclease P/MRP 25kDa subunit // 15q24.2 // 54913 /// ENST00000322177 // RPP25 // ribonuclease P/MRP 25kDa subunit // 15q24.2 // 54913 /// BC002497 // RPP25 // ribonuclease P/MRP 25kDa subunit // 15q24.2 // 54913 /// BC007270 // RPP25 // ribonuclease P/MRP 25kDa subunit // 15q24.2 // 54913 /// OTTHUMT00000286413 // RPP25 // ribonuclease P/MRP 25kDa subunit // 15q24.2 // 5…	NM_017793 // RefSeq // Homo sapiens ribonuclease P/MRP 25kDa subunit (RPP25), mRNA. // chr15 // 100 // 100 // 0 // --- // 0 /// ENST00000322177 // ENSEMBL // ribonuclease P/MRP 25kDa subunit [gene_biotype:protein_coding transcript_biotype:protein_coding] // chr15 // 100 // 100 // 0 // --- // 0 /// BC002497 // GenBank // Homo sapiens ribonuclease P/MRP 25kDa subunit, mRNA (cDNA clone MGC:1053 IMAG…
8	TC06004146.hg.1	-0.00750084	0.0067944	0.241707	no	-0.0044005	0.0172226	0.568647	no	-41.3333	6	-	32119758	32122142	32122142	PRRT1	OTTHUMT00000076259 // PRRT1 // proline-rich transmembrane protein 1 // 6p21.32 // 80863 /// OTTHUMT00000076260 // PRRT1 // proline-rich transmembrane protein 1 // 6p21.32 // 80863 /// OTTHUMT00000076262 // PRRT1 // proline-rich transmembrane protein 1 // 6p21.32 // 80863 /// OTTHUMT00000268924 // PRRT1 // proline-rich transmembrane protein 1 // 6p21.32 // 80863 /// OTTHUMT00000268925 // PRRT1 // …	OTTHUMT00000076259 // Havana transcript // proline-rich transmembrane protein 1[gene_biotype:protein_coding transcript_biotype:processed_transcript] // chr6 // 100 // 100 // 0 // --- // 0 /// OTTHUMT00000076260 // Havana transcript // proline-rich transmembrane protein 1[gene_biotype:protein_coding transcript_biotype:processed_transcript] // chr6 // 100 // 100 // 0 // --- // 0 /// OTTHUMT00000076…
6	TC05001093.hg.1	-0.0147058	0.0158249	0.368788	no	-0.0113044	0.0251633	0.568835	no	-23.1301	5	-	269973	271631	271631		---	ENST00000512642 // ENSEMBL // havana:known chromosome:GRCh38:5:269858:271516:-1 gene:ENSG00000248925 gene_biotype:antisense transcript_biotype:antisense // chr5 // 100 // 100 // 0 // --- // 0 /// OTTHUMT00000365461 // Havana transcript // novel transcript[gene_biotype:antisense transcript_biotype:antisense] // chr5 // 100 // 100 // 0 // --- // 0
13	TC08002614.hg.1	0.00036455	0.0128411	0.948672	no	-0.00386905	0.00874382	0.57348	no	-1161.32	8	-	28203102	28260218	28260218	ZNF395	NM_018660 // ZNF395 // zinc finger protein 395 // 8p21.1 // 55893 /// ENST00000344423 // ZNF395 // zinc finger protein 395 // 8p21.1 // 55893 /// ENST00000519730 // ZNF395 // zinc finger protein 395 // 8p21.1 // 55893 /// ENST00000523095 // ZNF395 // zinc finger protein 395 // 8p21.1 // 55893 /// ENST00000523202 // ZNF395 // zinc finger protein 395 // 8p21.1 // 55893 /// AK002050 // ZNF395 // zin…	NM_018660 // RefSeq // Homo sapiens zinc finger protein 395 (ZNF395), mRNA. // chr8 // 100 // 100 // 0 // --- // 0 /// ENST00000344423 // ENSEMBL // zinc finger protein 395 [gene_biotype:protein_coding transcript_biotype:protein_coding] // chr8 // 100 // 100 // 0 // --- // 0 /// ENST00000519730 // ENSEMBL // zinc finger protein 395 [gene_biotype:protein_coding transcript_biotype:processed_transcr…
17	TC15000691.hg.1	0.0083045	0.0137785	0.568606	no	0.00988219	0.0274939	0.57558	no	18.9981	15	+	75491233	75504510	75491233	C15orf39	NM_015492 // C15orf39 // chromosome 15 open reading frame 39 // 15q24.2 // 56905 /// ENST00000360639 // C15orf39 // chromosome 15 open reading frame 39 // 15q24.2 // 56905 /// ENST00000394987 // C15orf39 // chromosome 15 open reading frame 39 // 15q24.2 // 56905 /// AK128205 // C15orf39 // chromosome 15 open reading frame 39 // 15q24.2 // 56905 /// AL109730 // C15orf39 // chromosome 15 open readi…	NM_015492 // RefSeq // Homo sapiens chromosome 15 open reading frame 39 (C15orf39), mRNA. // chr15 // 100 // 100 // 0 // --- // 0 /// ENST00000360639 // ENSEMBL // chromosome 15 open reading frame 39 [gene_biotype:protein_coding transcript_biotype:protein_coding] // chr15 // 100 // 100 // 0 // --- // 0 /// ENST00000394987 // ENSEMBL // chromosome 15 open reading frame 39 [gene_biotype:protein_cod…
10	TC07000279.hg.1	-0.00283186	0.0120336	0.809251	no	0.00785029	0.00647161	0.576647	no	377.213	7	+	44888015	44889167	44888015		---	ENST00000443162 // ENSEMBL // havana:known chromosome:GRCh38:7:44848416:44849568:1 gene:ENSG00000234183 gene_biotype:antisense transcript_biotype:antisense // chr7 // 100 // 100 // 0 // --- // 0 /// ENST00000450016 // ENSEMBL // havana:known chromosome:GRCh38:7:44849059:44849565:1 gene:ENSG00000234183 gene_biotype:antisense transcript_biotype:antisense // chr7 // 100 // 100 // 0 // --- // 0 /// O…
8	TC06001555.hg.1	0.00249671	0.0138642	0.695497	no	0.00435326	0.019861	0.577192	no	74.36	6	-	31976197	31981050	31981050	TNXB;TNXA	NM_032470 // TNXB // tenascin XB // 6p21.3 // 7148 /// NR_001284 // TNXA // tenascin XA (pseudogene) // 6p21.3 // 7146 /// NR_001284 // TNXA // tenascin XA (pseudogene) // 6p21.3 // 7146	NM_032470 // RefSeq // Homo sapiens tenascin XB (TNXB), transcript variant XB-S, mRNA. // chr6 // 100 // 100 // 0 // --- // 0 /// NR_001284 // RefSeq // Homo sapiens tenascin XA (pseudogene) (TNXA), non-coding RNA. // chr6 // 100 // 100 // 0 // --- // 0 /// NR_001284 // NONCODE // accn=NR_001284 class=lncRNA name= ref=RefGeneNoncode transcriptId=NR_001284 cpcScore=7.0020200 cnci=-0.0822726 // chr…
8	TC06004075.hg.1	-0.00480761	0.0165966	0.768762	no	-0.0110712	0.0185434	0.578611	no	130.286	6	+	31637944	31641553	31637944	LY6G5B	NM_021221 // LY6G5B // lymphocyte antigen 6 complex, locus G5B // 6p21.3 // 58496 /// ENST00000375864 // LY6G5B // lymphocyte antigen 6 complex, locus G5B // 6p21.3 // 58496 /// ENST00000409525 // LY6G5B // lymphocyte antigen 6 complex, locus G5B // 6p21.3 // 58496 /// OTTHUMT00000076470 // LY6G5B // lymphocyte antigen 6 complex, locus G5B // 6p21.3 // 58496 /// OTTHUMT00000124389 // LY6G5B // ly…	NM_021221 // RefSeq // Homo sapiens lymphocyte antigen 6 complex, locus G5B (LY6G5B), mRNA. // chr6 // 100 // 100 // 0 // --- // 0 /// ENST00000375864 // ENSEMBL // lymphocyte antigen 6 complex, locus G5B [gene_biotype:protein_coding transcript_biotype:protein_coding] // chr6 // 100 // 100 // 0 // --- // 0 /// ENST00000409525 // ENSEMBL // lymphocyte antigen 6 complex, locus G5B [gene_biotype:pro…
18	TC21000418.hg.1	0.000424415	0.0161691	0.974039	no	0.00867827	0.0268066	0.58031	no	1944.76	21	-	35818988	35884573	35884573	KCNE1	NM_000219 // KCNE1 // potassium channel, voltage gated subfamily E regulatory beta subunit 1 // 21q22.12 // 3753 /// NM_001127668 // KCNE1 // potassium channel, voltage gated subfamily E regulatory beta subunit 1 // 21q22.12 // 3753 /// NM_001127669 // KCNE1 // potassium channel, voltage gated subfamily E regulatory beta subunit 1 // 21q22.12 // 3753 /// NM_001127670 // KCNE1 // potassium channel…	NM_000219 // RefSeq // Homo sapiens potassium voltage-gated channel, Isk-related family, member 1 (KCNE1), transcript variant 2, mRNA. // chr21 // 100 // 100 // 0 // --- // 0 /// NM_001127668 // RefSeq // Homo sapiens potassium voltage-gated channel, Isk-related family, member 1 (KCNE1), transcript variant 3, mRNA. // chr21 // 100 // 100 // 0 // --- // 0 /// NM_001127669 // RefSeq // Homo sapiens…
17	TC15000689.hg.1	-0.00971688	0.0171334	0.476326	no	-0.00897842	0.0148413	0.582876	no	-7.59972	15	+	75288945	75289555	75288945	SCAMP5	BC150506 // SCAMP5 // secretory carrier membrane protein 5 // 15q24.2 // 192683	BC150506 // GenBank // Homo sapiens cDNA clone IMAGE:40132535. // chr15 // 100 // 100 // 0 // --- // 0 /// uc010bki.1 // UCSC Genes // Homo sapiens cDNA clone IMAGE:40132533. // chr15 // 100 // 100 // 0 // --- // 0 /// uc010bki.1 // NONCODE // accn=NULL class=lncRNA name= ref=UCSCGeneNoncode transcriptId=uc010bki.1 cpcScore=-1.0402200 cnci=-0.2434042 // chr15 // 100 // 100 // 0 // --- // 0
8	TC06002723.hg.1	0.00583282	0.0192405	0.499209	no	0.00568732	0.0163332	0.583552	no	-2.49448	6	+	32121776	32136062	32121776	EGFL8;PPT2-EGFL8	NR_037860 // EGFL8 // EGF-like-domain, multiple 8 // 6p21.32 // 80864 /// NR_037861 // PPT2-EGFL8 // PPT2-EGFL8 readthrough (NMD candidate) // 6p // 100532746	NR_037860 // NONCODE // accn=NR_037860 class=lncRNA name= ref=RefGeneNoncode transcriptId=NR_037860 cpcScore=3.1905200 cnci=-0.1085205 // chr6 // 100 // 100 // 0 // --- // 0 /// NR_037861 // NONCODE // accn=NR_037861 class=lncRNA name= ref=RefGeneNoncode transcriptId=NR_037861 cpcScore=4.9579600 cnci=-0.1227873 // chr6 // 100 // 100 // 0 // --- // 0
10	TC07002284.hg.1	-0.00612681	0.0141242	0.644179	no	-0.00867834	0.0148526	0.590241	no	41.6454	7	+	44887843	44889231	44887843		---	TCONS_00013001 // NONCODE // accn=NULL class=lncRNA name=Human lincRNA ref=BodyMapLinc transcriptId=TCONS_00013001 cpcScore=-1.2104000 cnci=-0.3600839 // chr7 // 100 // 100 // 0 // --- // 0 /// TCONS_00014117 // NONCODE // accn=NULL class=lncRNA name=Human lincRNA ref=BodyMapLinc transcriptId=TCONS_00014117 cpcScore=-1.0450500 cnci=-0.2334185 // chr7 // 100 // 100 // 0 // --- // 0 /// TCONS_00014…
8	TC06001533.hg.1	-0.0144732	0.00576201	0.354913	no	-0.010099	0.011252	0.591329	no	-30.2223	6	-	31626075	31628549	31628549	C6orf47	NM_021184 // C6orf47 // chromosome 6 open reading frame 47 // 6p21.3 // 57827 /// ENST00000375911 // C6orf47 // chromosome 6 open reading frame 47 // 6p21.3 // 57827 /// BC012950 // C6orf47 // chromosome 6 open reading frame 47 // 6p21.3 // 57827 /// OTTHUMT00000076324 // C6orf47 // chromosome 6 open reading frame 47 // 6p21.3 // 57827 /// uc003nvm.1 // C6orf47 // chromosome 6 open reading frame …	NM_021184 // RefSeq // Homo sapiens chromosome 6 open reading frame 47 (C6orf47), mRNA. // chr6 // 100 // 100 // 0 // --- // 0 /// ENST00000375911 // ENSEMBL // chromosome 6 open reading frame 47 [gene_biotype:protein_coding transcript_biotype:protein_coding] // chr6 // 100 // 100 // 0 // --- // 0 /// BC012950 // GenBank // Homo sapiens chromosome 6 open reading frame 47, mRNA (cDNA clone MGC:894…
6	TC05000003.hg.1	-0.013987	0.0226571	0.327368	no	-0.00931316	0.0181759	0.592005	no	-33.4156	5	+	191626	195468	191626	LRRC14B	NM_001080478 // LRRC14B // leucine rich repeat containing 14B // 5p15.33 // 389257 /// ENST00000328278 // LRRC14B // leucine rich repeat containing 14B // 5p15.33 // 389257 /// OTTHUMT00000365393 // LRRC14B // leucine rich repeat containing 14B // 5p15.33 // 389257 /// uc003jal.1 // LRRC14B // leucine rich repeat containing 14B // 5p15.33 // 389257	NM_001080478 // RefSeq // Homo sapiens leucine rich repeat containing 14B (LRRC14B), mRNA. // chr5 // 100 // 100 // 0 // --- // 0 /// ENST00000328278 // ENSEMBL // leucine rich repeat containing 14B [gene_biotype:protein_coding transcript_biotype:protein_coding] // chr5 // 100 // 100 // 0 // --- // 0 /// OTTHUMT00000365393 // Havana transcript // leucine rich repeat containing 14B[gene_biotype:pr…
16	TC15002474.hg.1	0.00556787	0.00730161	0.601491	no	0.00687822	0.0222431	0.597419	no	23.5341	15	-	33595778	33602861	33602861		---	TCONS_l2_00009004-XLOC_l2_004870 // Broad TUCP // linc-FMN1-2 chr15:-:33595777-33602798 // chr15 // 100 // 100 // 0 // --- // 0 /// TCONS_l2_00009005-XLOC_l2_004870 // Broad TUCP // linc-FMN1-2 chr15:-:33595928-33602861 // chr15 // 100 // 100 // 0 // --- // 0 /// TCONS_l2_00009006-XLOC_l2_004870 // Broad TUCP // linc-FMN1-2 chr15:-:33596102-33602504 // chr15 // 100 // 100 // 0 // --- // 0 /// TCO…
3	TC01000850.hg.1	-0.000572455	0.0156287	0.963953	no	-0.00809079	0.0339791	0.598966	no	1313.35	1	+	92545862	92613401	92545862	BTBD8	NM_183242 // BTBD8 // BTB (POZ) domain containing 8 // 1p22.1 // 284697 /// ENST00000342818 // BTBD8 // BTB (POZ) domain containing 8 // 1p22.1 // 284697 /// ENST00000370382 // BTBD8 // BTB (POZ) domain containing 8 // 1p22.1 // 284697 /// AK296516 // BTBD8 // BTB (POZ) domain containing 8 // 1p22.1 // 284697 /// BC013922 // BTBD8 // BTB (POZ) domain containing 8 // 1p22.1 // 284697 /// OTTHUMT00…	NM_183242 // RefSeq // Homo sapiens BTB (POZ) domain containing 8 (BTBD8), mRNA. // chr1 // 100 // 100 // 0 // --- // 0 /// ENST00000342818 // ENSEMBL // BTB (POZ) domain containing 8 [gene_biotype:protein_coding transcript_biotype:protein_coding] // chr1 // 100 // 100 // 0 // --- // 0 /// ENST00000370382 // ENSEMBL // BTB (POZ) domain containing 8 [gene_biotype:protein_coding transcript_biotype:…
17	TC15001656.hg.1	-0.01065	0.0144482	0.421306	no	-0.00839664	0.0366102	0.600308	no	-21.1581	15	-	75413877	75414007	75414007		---	ENST00000516913 // ENSEMBL // Small Cajal body specific RNA 20 [gene_biotype:scaRNA transcript_biotype:scaRNA] // chr15 // 100 // 100 // 0 // --- // 0
13	TC08001091.hg.1	0.0274044	0.0187184	0.147467	no	0.0119735	0.0105893	0.600615	no	-56.3081	8	-	28273041	28277572	28277572		---	ENST00000522589 // ENSEMBL // havana:known chromosome:GRCh38:8:28415524:28420055:-1 gene:ENSG00000254370 gene_biotype:sense_intronic transcript_biotype:sense_intronic // chr8 // 100 // 100 // 0 // --- // 0 /// OTTHUMT00000376330 // Havana transcript // putative novel transcript[gene_biotype:sense_intronic transcript_biotype:sense_intronic] // chr8 // 100 // 100 // 0 // --- // 0
7	TC05000596.hg.1	-0.0361873	0.00956256	0.134476	no	-0.0152846	0.0152953	0.601195	no	-57.7625	5	+	124443897	124485622	124443897		---	ENST00000512965 // ENSEMBL // havana:known chromosome:GRCh38:5:125108204:125149929:1 gene:ENSG00000249365 gene_biotype:lincRNA transcript_biotype:lincRNA // chr5 // 100 // 100 // 0 // --- // 0 /// OTTHUMT00000371327 // Havana transcript // novel transcript[gene_biotype:lincRNA transcript_biotype:lincRNA] // chr5 // 100 // 100 // 0 // --- // 0
8	TC06004079.hg.1	-0.00134424	0.0172242	0.738139	no	-0.00249161	0.00987401	0.602682	no	85.3543	6	+	31949801	31970458	31949801	C4B;C4B_2;C4A	NM_001002029 // C4B // complement component 4B (Chido blood group) // 6p21.3 // 721 /// NM_001242823 // C4B_2 // complement component 4B (Chido blood group), copy 2 // --- // 100293534 /// NM_001252204 // C4A // complement component 4A (Rodgers blood group) // 6p21.3 // 720 /// NM_007293 // C4A // complement component 4A (Rodgers blood group) // 6p21.3 // 720 /// ENST00000428956 // C4A // complem…	NM_001002029 // RefSeq // Homo sapiens complement component 4B (Chido blood group) (C4B), mRNA. // chr6 // 100 // 100 // 0 // --- // 0 /// NM_001242823 // RefSeq // Homo sapiens complement component 4B (Chido blood group), copy 2 (C4B_2), mRNA. // chr6 // 100 // 100 // 0 // --- // 0 /// NM_001252204 // RefSeq // Homo sapiens complement component 4A (Rodgers blood group) (C4A), transcript variant …
1	TC01002643.hg.1	-0.00729627	0.00816995	0.332437	no	-0.00467671	0.0174625	0.606207	no	-35.9027	1	-	50883222	50889172	50889172	DMRTA2	NM_032110 // DMRTA2 // DMRT-like family A2 // 1p32.3 // 63950 /// ENST00000404795 // DMRTA2 // DMRT-like family A2 // 1p32.3 // 63950 /// ENST00000418121 // DMRTA2 // DMRT-like family A2 // 1p32.3 // 63950 /// BC136282 // DMRTA2 // DMRT-like family A2 // 1p32.3 // 63950 /// BC143800 // DMRTA2 // DMRT-like family A2 // 1p32.3 // 63950 /// OTTHUMT00000021723 // DMRTA2 // DMRT-like family A2 // 1p32…	NM_032110 // RefSeq // Homo sapiens DMRT-like family A2 (DMRTA2), mRNA. // chr1 // 100 // 100 // 0 // --- // 0 /// ENST00000404795 // ENSEMBL // DMRT-like family A2 [gene_biotype:protein_coding transcript_biotype:protein_coding] // chr1 // 100 // 100 // 0 // --- // 0 /// ENST00000418121 // ENSEMBL // DMRT-like family A2 [gene_biotype:protein_coding transcript_biotype:protein_coding] // chr1 // 10…
4	TC02003462.hg.1	-0.0024526	0.0154364	0.809957	no	0.00630653	0.0262259	0.609194	no	357.136	2	+	105469951	105471715	105469951		---	TCONS_l2_00013870-XLOC_l2_007470 // Broad TUCP // linc-POU3F3-1 chr2:+:105469950-105470961 // chr2 // 100 // 100 // 0 // --- // 0 /// TCONS_l2_00013871-XLOC_l2_007470 // Broad TUCP // linc-POU3F3-1 chr2:+:105470368-105471665 // chr2 // 100 // 100 // 0 // --- // 0 /// TCONS_l2_00013872-XLOC_l2_007470 // Broad TUCP // linc-POU3F3-1 chr2:+:105470380-105471715 // chr2 // 100 // 100 // 0 // --- // 0
8	TC06000389.hg.1	-0.0043313	0.0140308	0.555862	no	-0.00466028	0.0222974	0.609433	no	7.59529	6	+	31926581	31937532	31926581	SKIV2L	NM_006929 // SKIV2L // SKI2 homolog, superkiller viralicidic activity 2-like // 6p21 // 6499 /// ENST00000375394 // SKIV2L // SKI2 homolog, superkiller viralicidic activity 2-like // 6p21 // 6499 /// ENST00000488648 // SKIV2L // SKI2 homolog, superkiller viralicidic activity 2-like // 6p21 // 6499 /// AK297230 // SKIV2L // SKI2 homolog, superkiller viralicidic activity 2-like // 6p21 // 6499 /// …	NM_006929 // RefSeq // Homo sapiens SKI2 homolog, superkiller viralicidic activity 2-like (SKIV2L), mRNA. // chr6 // 100 // 100 // 0 // --- // 0 /// ENST00000375394 // ENSEMBL // superkiller viralicidic activity 2-like (S. cerevisiae) [gene_biotype:protein_coding transcript_biotype:protein_coding] // chr6 // 100 // 100 // 0 // --- // 0 /// ENST00000488648 // ENSEMBL // superkiller viralicidic act…
8	TC06002720.hg.1	0.00934689	0.00503986	0.488892	no	0.00845368	0.0278868	0.610383	no	-9.55614	6	+	31964272	31964815	31964272	C4A	V00502 // C4A // complement component 4A (Rodgers blood group) // 6p21.3 // 720	V00502 // NONCODE // accn=V00502 class=mRNAlike lncRNA name=NULL ref=H-invitational v7.5 transcriptId=HIT000320805 cpcScore=1.6218900 cnci=-0.0351884 // chr6 // 100 // 100 // 0 // --- // 0
13	TC08000217.hg.1	-0.000802401	0.0191167	0.950096	no	-0.00808367	0.00787366	0.610576	no	907.435	8	+	28174503	28200872	28174503	PNOC	NM_006228 // PNOC // prepronociceptin // 8p21 // 5368 /// ENST00000301908 // PNOC // prepronociceptin // 8p21 // 5368 /// ENST00000522209 // PNOC // prepronociceptin // 8p21 // 5368 /// AK289633 // PNOC // prepronociceptin // 8p21 // 5368 /// AK301456 // PNOC // prepronociceptin // 8p21 // 5368 /// BC034758 // PNOC // prepronociceptin // 8p21 // 5368 /// OTTHUMT00000219964 // PNOC // prepronocice…	NM_006228 // RefSeq // Homo sapiens prepronociceptin (PNOC), transcript variant 1, mRNA. // chr8 // 100 // 100 // 0 // --- // 0 /// ENST00000301908 // ENSEMBL // prepronociceptin [gene_biotype:protein_coding transcript_biotype:protein_coding] // chr8 // 100 // 100 // 0 // --- // 0 /// ENST00000522209 // ENSEMBL // prepronociceptin [gene_biotype:protein_coding transcript_biotype:protein_coding] //…
10	TC07001340.hg.1	0.00485024	0.0146005	0.478411	no	0.00415964	0.0225221	0.610978	no	-14.2385	7	-	44421965	44530479	44530479	NUDCD3	NM_015332 // NUDCD3 // NudC domain containing 3 // 7p13-p12 // 23386 /// ENST00000338427 // NUDCD3 // NudC domain containing 3 // 7p13-p12 // 23386 /// ENST00000355451 // NUDCD3 // NudC domain containing 3 // 7p13-p12 // 23386 /// ENST00000460110 // NUDCD3 // NudC domain containing 3 // 7p13-p12 // 23386 /// BC003691 // NUDCD3 // NudC domain containing 3 // 7p13-p12 // 23386 /// BC017657 // NUDCD…	NM_015332 // RefSeq // Homo sapiens NudC domain containing 3 (NUDCD3), mRNA. // chr7 // 100 // 100 // 0 // --- // 0 /// ENST00000338427 // ENSEMBL // NudC domain containing 3 [gene_biotype:protein_coding transcript_biotype:processed_transcript] // chr7 // 100 // 100 // 0 // --- // 0 /// ENST00000355451 // ENSEMBL // NudC domain containing 3 [gene_biotype:protein_coding transcript_biotype:protein_…
14	TC09000794.hg.1	0.00479731	0.0344234	0.701654	no	0.00768894	0.0185774	0.612438	no	60.2763	9	+	138359934	138364095	138359934	PPP1R26-AS1	ENST00000455039 // PPP1R26-AS1 // PPP1R26 antisense RNA 1 // --- // 100506599	ENST00000455039 // ENSEMBL // PPP1R26 antisense RNA 1 [gene_biotype:antisense transcript_biotype:antisense] // chr9 // 100 // 100 // 0 // --- // 0 /// OTTHUMT00000054989 // Havana transcript // [retired] cdna:all chromosome:VEGA50:9:138359934:138364095:1 Gene:OTTHUMG00000020905 // chr9 // 100 // 100 // 0 // --- // 0 /// OTTHUMT00000054989 // NONCODE // accn=NULL class=mRNAlike lncRNA name=vega ln…
17	TC15000687.hg.1	0.0119579	0.0168463	0.324825	no	0.00730783	0.010206	0.614271	no	-38.8868	15	+	75182363	75191798	75182363	MPI	NM_002435 // MPI // mannose phosphate isomerase // 15q24.1 // 4351 /// ENST00000323744 // MPI // mannose phosphate isomerase // 15q24.1 // 4351 /// ENST00000352410 // MPI // mannose phosphate isomerase // 15q24.1 // 4351 /// ENST00000535694 // MPI // mannose phosphate isomerase // 15q24.1 // 4351 /// AF504648 // MPI // mannose phosphate isomerase // 15q24.1 // 4351 /// AK294030 // MPI // mannose …	NM_002435 // RefSeq // Homo sapiens mannose phosphate isomerase (MPI), transcript variant 1, mRNA. // chr15 // 100 // 100 // 0 // --- // 0 /// ENST00000323744 // ENSEMBL // mannose phosphate isomerase [gene_biotype:protein_coding transcript_biotype:protein_coding] // chr15 // 100 // 100 // 0 // --- // 0 /// ENST00000352410 // ENSEMBL // mannose phosphate isomerase [gene_biotype:protein_coding tra…
8	TC06004077.hg.1	-0.00224197	0.0160994	0.641184	no	-0.00290249	0.014944	0.61487	no	29.4614	6	+	31913486	31919861	31913486	CFB	NM_001710 // CFB // complement factor B // 6p21.3 // 629 /// ENST00000425368 // CFB // complement factor B // 6p21.3 // 629 /// ENST00000497841 // CFB // complement factor B // 6p21.3 // 629 /// AF349679 // CFB // complement factor B // 6p21.3 // 629 /// AK304042 // CFB // complement factor B // 6p21.3 // 629 /// BC004143 // CFB // complement factor B // 6p21.3 // 629 /// OTTHUMT00000076395 // CF…	NM_001710 // RefSeq // Homo sapiens complement factor B (CFB), mRNA. // chr6 // 100 // 100 // 0 // --- // 0 /// ENST00000425368 // ENSEMBL // complement factor B [gene_biotype:protein_coding transcript_biotype:protein_coding] // chr6 // 100 // 100 // 0 // --- // 0 /// ENST00000497841 // ENSEMBL // complement factor B [gene_biotype:protein_coding transcript_biotype:processed_transcript] // chr6 //…
8	TC06004120.hg.1	0.00304759	0.0338315	0.397659	no	0.00216076	0.0132831	0.619124	no	-29.0994	6	-	32008931	32077151	32077151	TNXB	NM_019105 // TNXB // tenascin XB // 6p21.3 // 7148 /// NM_032470 // TNXB // tenascin XB // 6p21.3 // 7148 /// ENST00000375244 // TNXB // tenascin XB // 6p21.3 // 7148 /// ENST00000451343 // TNXB // tenascin XB // 6p21.3 // 7148 /// ENST00000479795 // TNXB // tenascin XB // 6p21.3 // 7148 /// BC071883 // TNXB // tenascin XB // 6p21.3 // 7148 /// OTTHUMT00000268927 // TNXB // tenascin XB // 6p21.3 …	NM_019105 // RefSeq // Homo sapiens tenascin XB (TNXB), transcript variant XB, mRNA. // chr6 // 100 // 100 // 0 // --- // 0 /// NM_032470 // RefSeq // Homo sapiens tenascin XB (TNXB), transcript variant XB-S, mRNA. // chr6 // 100 // 100 // 0 // --- // 0 /// ENST00000375244 // ENSEMBL // tenascin XB [gene_biotype:protein_coding transcript_biotype:protein_coding] // chr6 // 100 // 100 // 0 // --- /…
6	TC05001096.hg.1	-0.00154023	0.0216638	0.736739	no	-0.00273842	0.0769755	0.621693	no	77.7926	5	-	473334	524549	524549	SLC9A3	NM_004174 // SLC9A3 // solute carrier family 9, subfamily A (NHE3, cation proton antiporter 3), member 3 // 5p15.3 // 6550 /// ENST00000264938 // SLC9A3 // solute carrier family 9, subfamily A (NHE3, cation proton antiporter 3), member 3 // 5p15.3 // 6550 /// ENST00000514375 // SLC9A3 // solute carrier family 9, subfamily A (NHE3, cation proton antiporter 3), member 3 // 5p15.3 // 6550 /// BC1016…	NM_004174 // RefSeq // Homo sapiens solute carrier family 9, subfamily A (NHE3, cation proton antiporter 3), member 3 (SLC9A3), transcript variant 1, mRNA. // chr5 // 100 // 100 // 0 // --- // 0 /// ENST00000264938 // ENSEMBL // solute carrier family 9, subfamily A (NHE3, cation proton antiporter 3), member 3 [gene_biotype:protein_coding transcript_biotype:protein_coding] // chr5 // 100 // 100 //…
10	TC07000276.hg.1	-0.013359	0.0132641	0.337566	no	-0.00832056	0.0261611	0.624054	no	-37.7155	7	+	44646121	44748669	44646121	OGDH	NM_001003941 // OGDH // oxoglutarate (alpha-ketoglutarate) dehydrogenase (lipoamide) // 7p14-p13 // 4967 /// NM_001165036 // OGDH // oxoglutarate (alpha-ketoglutarate) dehydrogenase (lipoamide) // 7p14-p13 // 4967 /// NM_002541 // OGDH // oxoglutarate (alpha-ketoglutarate) dehydrogenase (lipoamide) // 7p14-p13 // 4967 /// ENST00000222673 // OGDH // oxoglutarate (alpha-ketoglutarate) dehydrogenase…	NM_001003941 // RefSeq // Homo sapiens oxoglutarate (alpha-ketoglutarate) dehydrogenase (lipoamide) (OGDH), transcript variant 2, mRNA. // chr7 // 100 // 100 // 0 // --- // 0 /// NM_001165036 // RefSeq // Homo sapiens oxoglutarate (alpha-ketoglutarate) dehydrogenase (lipoamide) (OGDH), transcript variant 3, mRNA. // chr7 // 100 // 100 // 0 // --- // 0 /// NM_002541 // RefSeq // Homo sapiens oxogl…
17	TC15002281.hg.1	0.00390009	0.0116556	0.769649	no	-0.00778083	0.0219083	0.627379	no	-299.504	15	+	74753606	74773633	74753606	UBL7-AS1	ENST00000499217 // UBL7-AS1 // UBL7 antisense RNA 1 (head to head) // 15q24.1 // 440288 /// NR_038448 // UBL7-AS1 // UBL7 antisense RNA 1 (head to head) // 15q24.1 // 440288	ENST00000499217 // NONCODE // UBL7 antisense RNA 1 (head to head) [gene_biotype:antisense transcript_biotype:antisense] // chr15 // 100 // 100 // 0 // --- // 0 /// NR_038448 // NONCODE // accn=NR_038448 class=lncRNA name= ref=RefGeneNoncode transcriptId=NR_038448 cpcScore=-0.6372340 cnci=-0.2028034 // chr15 // 100 // 100 // 0 // --- // 0 /// uc002ayb.2 // NONCODE // accn=NULL class=lncRNA name= r…
8	TC06000395.hg.1	-0.000824601	0.0203379	0.95896	no	0.00922217	0.0796144	0.633215	no	1218.38	6	+	32146131	32151930	32146131	RNF5;RNF5P1	NM_006913 // RNF5 // ring finger protein 5, E3 ubiquitin protein ligase // 6p21.3 // 6048 /// NR_003129 // RNF5P1 // ring finger protein 5, E3 ubiquitin protein ligase pseudogene 1 // 8p11.22 // 286140 /// ENST00000375094 // RNF5 // ring finger protein 5, E3 ubiquitin protein ligase // 6p21.3 // 6048 /// ENST00000487940 // RNF5 // ring finger protein 5, E3 ubiquitin protein ligase // 6p21.3 // 60…	NM_006913 // RefSeq // Homo sapiens ring finger protein 5, E3 ubiquitin protein ligase (RNF5), mRNA. // chr6 // 100 // 100 // 0 // --- // 0 /// NR_003129 // RefSeq // Homo sapiens ring finger protein 5, E3 ubiquitin protein ligase pseudogene 1 (RNF5P1), non-coding RNA. // chr6 // 100 // 100 // 0 // --- // 0 /// ENST00000375094 // ENSEMBL // ring finger protein 5, E3 ubiquitin protein ligase [gene…
8	TC06004049.hg.1	0.00464728	0.00607051	0.585564	no	0.00498707	0.0104734	0.63511	no	7.31169	6	-	32148745	32152101	32152101	AGER	NM_001136 // AGER // advanced glycosylation end product-specific receptor // 6p21.3 // 177 /// NM_001206929 // AGER // advanced glycosylation end product-specific receptor // 6p21.3 // 177 /// NM_001206932 // AGER // advanced glycosylation end product-specific receptor // 6p21.3 // 177 /// NM_001206934 // AGER // advanced glycosylation end product-specific receptor // 6p21.3 // 177 /// NM_0012069…	NM_001136 // RefSeq // Homo sapiens advanced glycosylation end product-specific receptor (AGER), transcript variant 1, mRNA. // chr6 // 100 // 100 // 0 // --- // 0 /// NM_001206929 // RefSeq // Homo sapiens advanced glycosylation end product-specific receptor (AGER), transcript variant 2, mRNA. // chr6 // 100 // 100 // 0 // --- // 0 /// NM_001206932 // RefSeq // Homo sapiens advanced glycosylatio…
4	TC02003464.hg.1	-0.013692	0.00492402	0.500619	no	-0.0117159	0.0163466	0.635294	no	-14.4328	2	+	105719098	105720244	105719098		---	TCONS_00003808 // NONCODE // accn=NULL class=lncRNA name=Human lincRNA ref=BodyMapLinc transcriptId=TCONS_00003808 cpcScore=-1.0077900 cnci=-0.1990580 // chr2 // 100 // 100 // 0 // --- // 0
3	TC01002869.hg.1	-0.0269161	0.0197687	0.473211	no	-0.0218072	0.0251792	0.635415	no	-18.9807	1	-	93166376	93166491	93166491		---	ENST00000364447 // ENSEMBL // RNA, U4 small nuclear 59, pseudogene [gene_biotype:snRNA transcript_biotype:snRNA] // chr1 // 100 // 100 // 0 // --- // 0
14	TC09002341.hg.1	-0.00817199	0.00811499	0.583075	no	-0.00857412	0.0198373	0.635755	no	4.92087	9	+	138023133	138027186	138023133		---	TCONS_00016212 // NONCODE // accn=NULL class=lncRNA name=Human lincRNA ref=BodyMapLinc transcriptId=TCONS_00016212 cpcScore=-0.9198950 cnci=-0.2543254 // chr9 // 100 // 100 // 0 // --- // 0
17	TC15001647.hg.1	-0.00242013	0.0132126	0.678181	no	0.00327541	0.0173446	0.641181	no	235.34	15	-	75011883	75017951	75017951	CYP1A1	NM_000499 // CYP1A1 // cytochrome P450, family 1, subfamily A, polypeptide 1 // 15q24.1 // 1543 /// ENST00000379727 // CYP1A1 // cytochrome P450, family 1, subfamily A, polypeptide 1 // 15q24.1 // 1543 /// ENST00000395048 // CYP1A1 // cytochrome P450, family 1, subfamily A, polypeptide 1 // 15q24.1 // 1543 /// ENST00000395049 // CYP1A1 // cytochrome P450, family 1, subfamily A, polypeptide 1 // 1…	NM_000499 // RefSeq // Homo sapiens cytochrome P450, family 1, subfamily A, polypeptide 1 (CYP1A1), mRNA. // chr15 // 100 // 100 // 0 // --- // 0 /// ENST00000379727 // ENSEMBL // cytochrome P450, family 1, subfamily A, polypeptide 1 [gene_biotype:protein_coding transcript_biotype:protein_coding] // chr15 // 100 // 100 // 0 // --- // 0 /// ENST00000395048 // ENSEMBL // cytochrome P450, family 1, …
8	TC06004078.hg.1	-0.00260426	0.00830902	0.643272	no	-0.00314433	0.0154513	0.644356	no	20.7379	6	+	31938868	31949228	31938868	STK19	NM_004197 // STK19 // serine/threonine kinase 19 // 6p21.3 // 8859 /// NM_032454 // STK19 // serine/threonine kinase 19 // 6p21.3 // 8859 /// NR_026717 // STK19 // serine/threonine kinase 19 // 6p21.3 // 8859 /// ENST00000375331 // STK19 // serine/threonine kinase 19 // 6p21.3 // 8859 /// ENST00000375333 // STK19 // serine/threonine kinase 19 // 6p21.3 // 8859 /// AK303438 // STK19 // serine/thre…	NM_004197 // RefSeq // Homo sapiens serine/threonine kinase 19 (STK19), transcript variant 1, mRNA. // chr6 // 100 // 100 // 0 // --- // 0 /// NM_032454 // RefSeq // Homo sapiens serine/threonine kinase 19 (STK19), transcript variant 2, mRNA. // chr6 // 100 // 100 // 0 // --- // 0 /// NR_026717 // RefSeq // Homo sapiens serine/threonine kinase 19 (STK19), transcript variant 3, non-coding RNA. // …
1	TC01000613.hg.1	0.0113372	0.0118731	0.510118	no	0.00959186	0.0159231	0.644705	no	-15.3948	1	+	50459990	50461874	50459990		---	ENST00000448346 // ENSEMBL // cdna:known chromosome:GRCh37:1:50459990:50461874:1 gene:ENSG00000227839 gene_biotype:protein_coding transcript_biotype:protein_coding // chr1 // 100 // 100 // 0 // --- // 0
1	TC01004376.hg.1	-0.00762348	0.0256911	0.666917	no	-0.00962731	0.0293916	0.654084	no	26.285	1	+	50772147	50773062	50772147		---	TCONS_00000934 // NONCODE // accn=NULL class=lncRNA name=Human lincRNA ref=BodyMapLinc transcriptId=TCONS_00000934 cpcScore=-1.0840900 cnci=-0.3565461 // chr1 // 100 // 100 // 0 // --- // 0
15	TC10000108.hg.1	-0.0211257	0.0130376	0.280062	no	-0.0105533	0.00903199	0.654587	no	-50.0454	10	+	14033815	14049525	14033815		---	ENST00000446193 // ENSEMBL // havana:known chromosome:GRCh38:10:13991815:14007526:1 gene:ENSG00000229751 gene_biotype:antisense transcript_biotype:antisense // chr10 // 100 // 100 // 0 // --- // 0 /// OTTHUMT00000046885 // Havana transcript // novel transcript[gene_biotype:antisense transcript_biotype:antisense] // chr10 // 100 // 100 // 0 // --- // 0
4	TC02002160.hg.1	0.00272816	0.00866603	0.884412	no	0.00982855	0.0868742	0.665792	no	260.263	2	-	105197279	105198348	105198348	LOC105373524	ENST00000424257 // LOC105373524 // uncharacterized LOC105373524 // --- // 105373524	ENST00000424257 // ENSEMBL // havana:known chromosome:GRCh38:2:104580821:104581890:-1 gene:ENSG00000231626 gene_biotype:lincRNA transcript_biotype:lincRNA // chr2 // 100 // 100 // 0 // --- // 0 /// OTTHUMT00000329251 // NONCODE // putative novel transcript[gene_biotype:lincRNA transcript_biotype:lincRNA] // chr2 // 100 // 100 // 0 // --- // 0
4	TC02000636.hg.1	0.00884817	0.018454	0.608287	no	-0.00905159	0.0324105	0.665906	no	-202.299	2	+	105199610	105201812	105199610	LOC105373525	ENST00000438566 // LOC105373525 // uncharacterized LOC105373525 // --- // 105373525	ENST00000438566 // ENSEMBL // havana:known chromosome:GRCh38:2:104583152:104585354:1 gene:ENSG00000236109 gene_biotype:lincRNA transcript_biotype:lincRNA // chr2 // 100 // 100 // 0 // --- // 0 /// OTTHUMT00000329250 // NONCODE // putative novel transcript[gene_biotype:lincRNA transcript_biotype:lincRNA] // chr2 // 100 // 100 // 0 // --- // 0
7	TC05003212.hg.1	-0.00509462	0.0136421	0.803244	no	-0.0104953	0.0220175	0.669743	no	106.008	5	-	123676150	123676863	123676863		---	TCONS_00009771 // NONCODE // accn=NULL class=lncRNA name=Human lincRNA ref=BodyMapLinc transcriptId=TCONS_00009771 cpcScore=-1.2711600 cnci=-0.2463639 // chr5 // 100 // 100 // 0 // --- // 0
3	TC01000854.hg.1	-0.0036023	0.0110037	0.679471	no	0.00444524	0.0282385	0.673761	no	223.4	1	+	93297594	93307481	93297594	RPL5;SNORD21;SNORA66	NM_000969 // RPL5 // ribosomal protein L5 // 1p22.1 // 6125 /// NR_000006 // SNORD21 // small nucleolar RNA, C/D box 21 // 1p22.1 // 6083 /// NR_002444 // SNORA66 // small nucleolar RNA, H/ACA box 66 // 1p22.1 // 26782 /// ENST00000315741 // RPL5 // ribosomal protein L5 // 1p22.1 // 6125 /// ENST00000370321 // RPL5 // ribosomal protein L5 // 1p22.1 // 6125 /// ENST00000383953 // SNORD21 // small …	NM_000969 // RefSeq // Homo sapiens ribosomal protein L5 (RPL5), mRNA. // chr1 // 100 // 100 // 0 // --- // 0 /// NR_000006 // RefSeq // Homo sapiens small nucleolar RNA, C/D box 21 (SNORD21), small nucleolar RNA. // chr1 // 100 // 100 // 0 // --- // 0 /// NR_002444 // RefSeq // Homo sapiens small nucleolar RNA, H/ACA box 66 (SNORA66), small nucleolar RNA. // chr1 // 100 // 100 // 0 // --- // 0 /…
12	TC07003222.hg.1	0.00556146	0.0107706	0.764131	no	0.00937194	0.0230373	0.67439	no	68.5157	7	-	145372975	145378462	145378462		---	TCONS_00013270 // NONCODE // accn=NULL class=lncRNA name=Human lincRNA ref=BodyMapLinc transcriptId=TCONS_00013270 cpcScore=-0.9494880 cnci=-0.4095398 // chr7 // 100 // 100 // 0 // --- // 0
14	TC09000797.hg.1	0.00489406	0.00564893	0.641985	no	0.00534517	0.0373706	0.675797	no	9.21742	9	+	138413284	138418386	138413284	LCN1	NM_001252617 // LCN1 // lipocalin 1 // 9q34 // 3933 /// NM_001252618 // LCN1 // lipocalin 1 // 9q34 // 3933 /// NM_001252619 // LCN1 // lipocalin 1 // 9q34 // 3933 /// NM_002297 // LCN1 // lipocalin 1 // 9q34 // 3933 /// ENST00000263598 // LCN1 // lipocalin 1 // 9q34 // 3933 /// ENST00000371781 // LCN1 // lipocalin 1 // 9q34 // 3933 /// BC065721 // LCN1 // lipocalin 1 // 9q34 // 3933 /// BC074925…	NM_001252617 // RefSeq // Homo sapiens lipocalin 1 (LCN1), transcript variant 2, mRNA. // chr9 // 100 // 100 // 0 // --- // 0 /// NM_001252618 // RefSeq // Homo sapiens lipocalin 1 (LCN1), transcript variant 3, mRNA. // chr9 // 100 // 100 // 0 // --- // 0 /// NM_001252619 // RefSeq // Homo sapiens lipocalin 1 (LCN1), transcript variant 4, mRNA. // chr9 // 100 // 100 // 0 // --- // 0 /// NM_002297…
4	TC02003458.hg.1	-0.00819681	0.0123165	0.668703	no	0.00960615	0.0236038	0.67768	no	217.194	2	+	105127003	105128314	105127003		---	OTTHUMT00000329371 // NONCODE // putative novel transcript[gene_biotype:lincRNA transcript_biotype:lincRNA] // chr2 // 100 // 100 // 0 // --- // 0 /// OTTHUMT00000329372 // NONCODE // putative novel transcript[gene_biotype:lincRNA transcript_biotype:lincRNA] // chr2 // 100 // 100 // 0 // --- // 0 /// OTTHUMT00000329373 // NONCODE // putative novel transcript[gene_biotype:lincRNA transcript_biotyp…
11	TC07000419.hg.1	0.0026023	0.0131289	0.881527	no	0.00878394	0.01063	0.678977	no	237.545	7	+	68505139	68511790	68505139		---	ENST00000447158 // ENSEMBL // havana:known chromosome:GRCh38:7:69040152:69046803:1 gene:ENSG00000233689 gene_biotype:lincRNA transcript_biotype:lincRNA // chr7 // 100 // 100 // 0 // --- // 0 /// OTTHUMT00000344771 // Havana transcript // putative novel transcript[gene_biotype:lincRNA transcript_biotype:lincRNA] // chr7 // 100 // 100 // 0 // --- // 0
4	TC02003461.hg.1	0.0164086	0.0163253	0.342681	no	0.00863848	0.0225244	0.678991	no	-47.3541	2	+	105320216	105321967	105320216		---	TCONS_00002963 // NONCODE // accn=NULL class=lncRNA name=Human lincRNA ref=BodyMapLinc transcriptId=TCONS_00002963 cpcScore=-1.0847300 cnci=-0.2525209 // chr2 // 100 // 100 // 0 // --- // 0
[truncated: 136 more rows]

## Sheet: TS8
Table S8. Association of childhood SHS and child molecular phenotpyes adjusted for sustained maternal smoking in pregnancy
All molecular marks reaching multiple-testing correction in one of the main models (global-SHS or cotinine) are shown
		Global-SHS				Urinary cotinine
Molecular layer	Molecular mark	log2FC	SE	P-value	Adj. P-value	log2FC	SE	P-value	Adj. P-value	% change1
Plasma proteins	PAI1 (SERPINE1 gene)	0.165051	0.0440245	0.0270221	no	0.378693	0.0505384	0.000165732	yes	129.44
[truncated: 4 more rows]

## Sheet: TS9
Table S9. Comparison of the association of own smoking in adults and childhood SHS with serum metabolites, ordered by metabolite name
[truncated: 29 more rows]

[truncated: 11 more sheets: TS10, TS11, TS12, TS13, TS14, TS15, TS16, TS17, TS18, TS19, TS20]
